# Supplementary material for: The structure of human dermatan sulfate epimerase 1 emphasizes the importance of C5-epimerization of glucuronic acid in higher organisms
Source: Chem Sci. 2020 Dec 8;12(5):1869–85. doi: 10.1039/d0sc05971d (PMC8006597; doi:10.1039/d0sc05971d)
Supplement: Supplementary file 5 [file SC-012-D0SC05971D-s005.xlsx]

## Sheet: Correct
Supplementary Table 1. DS-epi1 Blast hits.
Name	Species	ID	Taxonomy ID	Length (aa)	% identity	alignment length	mismatches	gap opens	query start	query end	subject start	subject end	evalue	bit score	% positives
dermatan-sulfate epimerase isoform a precursor	Homo sapiens	NP_037484.1	9606	958	100	144	0	0	1	144	755	898	7.30e-91	292	100.00
PREDICTED: dermatan-sulfate epimerase isoform X2	Nomascus leucogenys	XP_003255647.1	61853	958	100	144	0	0	1	144	755	898	2.12e-90	291	100.00
PREDICTED: dermatan-sulfate epimerase	Gorilla gorilla gorilla	XP_018884816.1	9595	958	99.306	144	1	0	1	144	755	898	8.74e-90	289	100.00
dermatan-sulfate epimerase isoform X1	Pan paniscus	XP_008951154.1	9597	958	99.306	144	1	0	1	144	755	898	7.48e-90	289	99.31
dermatan-sulfate epimerase isoform X2	Pan troglodytes	XP_009450150.1	9598	958	99.306	144	1	0	1	144	755	898	5.94e-90	290	99.31
PREDICTED: dermatan-sulfate epimerase	Cercocebus atys	XP_011905957.1	9531	958	98.611	144	2	0	1	144	755	898	3.15e-89	288	100.00
PREDICTED: dermatan-sulfate epimerase isoform X1	Macaca fascicularis	XP_015304063.1	9541	958	98.611	144	2	0	1	144	755	898	2.45e-89	288	100.00
PREDICTED: dermatan-sulfate epimerase isoform X1	Macaca mulatta	XP_001111756.1	9544	958	98.611	144	2	0	1	144	755	898	2.45e-89	288	100.00
dermatan-sulfate epimerase isoform X1	Papio anubis	XP_009204498.1	9555	958	98.611	144	2	0	1	144	755	898	1.76e-89	288	100.00
dermatan-sulfate epimerase isoform X1	Pongo abelii	XP_002817315.2	9601	958	98.611	144	2	0	1	144	755	898	3.02e-89	288	99.31
PREDICTED: dermatan-sulfate epimerase isoform X2	Chlorocebus sabaeus	XP_008005448.1	60711	958	98.611	144	2	0	1	144	755	898	1.02e-89	289	100.00
PREDICTED: dermatan-sulfate epimerase	Rhinopithecus roxellana	XP_010371518.1	61622	958	98.611	144	2	0	1	144	755	898	1.54e-89	288	100.00
dermatan-sulfate epimerase isoform X1	Piliocolobus tephrosceles	XP_023074794.1	591936	958	98.611	144	2	0	1	144	755	898	1.21e-89	289	100.00
PREDICTED: dermatan-sulfate epimerase	Rhinopithecus bieti	XP_017710949.1	61621	874	98.333	120	2	0	1	120	755	874	7.68e-71	237	98.33
PREDICTED: dermatan-sulfate epimerase	Mandrillus leucophaeus	XP_011857709.1	9568	977	97.917	144	3	0	1	144	774	917	1.38e-88	286	100.00
dermatan-sulfate epimerase isoform X1	Aotus nancymaae	XP_012315835.1	37293	958	97.917	144	3	0	1	144	755	898	2.31e-89	288	100.00
dermatan-sulfate epimerase isoform X1	Otolemur garnettii	XP_003781657.1	30611	959	97.241	145	3	1	1	144	755	899	1.46e-87	283	99.31
PREDICTED: dermatan-sulfate epimerase isoform X1	Ceratotherium simum simum	XP_004422298.1	73337	959	97.241	145	3	1	1	144	755	899	3.61e-87	282	98.62
PREDICTED: dermatan-sulfate epimerase isoform X1	Callithrix jacchus	XP_002746933.1	9483	958	97.222	144	4	0	1	144	755	898	5.36e-89	287	100.00
PREDICTED: dermatan-sulfate epimerase	Saimiri boliviensis boliviensis	XP_010347613.1	39432	958	97.222	144	4	0	1	144	755	898	1.76e-88	286	99.31
PREDICTED: dermatan-sulfate epimerase	Colobus angolensis palliatus	XP_011790437.1	336983	977	97.222	144	4	0	1	144	774	917	3.74e-88	285	99.31
dermatan-sulfate epimerase isoform X1	Macaca nemestrina	XP_011712211.1	9545	958	96.528	144	5	0	1	144	755	898	2.95e-87	282	99.31
dermatan-sulfate epimerase isoform X1	Microcebus murinus	XP_012608677.1	30608	957	96.528	144	4	1	1	144	755	897	2.24e-85	277	97.92
PREDICTED: dermatan-sulfate epimerase	Propithecus coquereli	XP_012505609.1	379532	957	96.528	144	4	1	1	144	755	897	1.75e-85	278	97.92
dermatan-sulfate epimerase isoform X1	Dasypus novemcinctus	XP_004471270.1	9361	959	95.862	145	5	1	1	144	755	899	2.18e-86	280	98.62
PREDICTED: dermatan-sulfate epimerase isoform X1	Equus asinus	XP_014721630.1	9793	959	95.862	145	5	1	1	144	755	899	2.12e-85	278	97.24
dermatan-sulfate epimerase isoform X1	Equus caballus	XP_001502727.2	9796	959	95.862	145	5	1	1	144	755	899	1.99e-85	278	97.24
PREDICTED: dermatan-sulfate epimerase isoform X2	Equus przewalskii	XP_008516409.1	9798	823	95.862	145	5	1	1	144	619	763	1.28e-85	276	97.24
PREDICTED: dermatan-sulfate epimerase	Tupaia chinensis	XP_006165051.1	246437	976	95.862	145	3	3	1	144	774	916	1.25e-82	270	97.24
PREDICTED: dermatan-sulfate epimerase isoform X1	Rhinolophus sinicus	XP_019596921.1	89399	958	95.833	144	6	0	1	144	755	898	1.90e-77	256	97.92
PREDICTED: dermatan-sulfate epimerase isoform X1	Cebus capucinus imitator	XP_017352930.1	1737458	958	95.833	144	6	0	1	144	755	898	5.09e-78	258	98.61
dermatan-sulfate epimerase isoform X2	Felis catus	XP_023110043.1	9685	955	95.804	143	5	1	1	143	755	896	6.84e-84	273	97.20
PREDICTED: dermatan-sulfate epimerase isoform X1	Panthera pardus	XP_019294471.1	9691	955	95.804	143	5	1	1	143	755	896	7.67e-84	273	97.20
PREDICTED: dermatan-sulfate epimerase	Acinonyx jubatus	XP_014938313.1	32536	955	95.804	143	5	1	1	143	755	896	4.34e-84	274	97.20
PREDICTED: dermatan-sulfate epimerase	Leptonychotes weddellii	XP_006734297.1	9713	958	95.522	134	6	0	2	135	756	889	6.55e-71	238	98.51
PREDICTED: dermatan-sulfate epimerase	Marmota marmota marmota	XP_015355941.1	9994	960	95.205	146	5	1	1	144	755	900	2.53e-81	266	97.26
dermatan-sulfate epimerase isoform X2	Physeter catodon	XP_023971349.1	9755	958	95.139	144	7	0	1	144	755	898	2.56e-77	256	97.92
PREDICTED: dermatan-sulfate epimerase isoform X1	Camelus bactrianus	XP_010963756.1	9837	958	95.139	144	7	0	1	144	755	898	1.23e-76	254	97.22
dermatan-sulfate epimerase precursor	Camelus ferus	EPY74571.1	419612	845	95.139	144	7	0	1	144	642	785	4.43e-77	253	97.22
dermatan-sulfate epimerase	Ictidomys tridecemlineatus	XP_005340911.1	43179	818	94.483	145	7	1	1	144	614	758	8.09e-79	258	97.93
PREDICTED: dermatan-sulfate epimerase	Camelus dromedarius	XP_010977440.1	9838	958	94.444	144	8	0	1	144	755	898	3.98e-76	253	97.22
PREDICTED: dermatan-sulfate epimerase isoform X1	Vicugna pacos	XP_015095943.1	30538	958	94.444	144	8	0	1	144	755	898	5.23e-75	249	97.22
PREDICTED: dermatan-sulfate epimerase isoform X3	Odobenus rosmarus divergens	XP_004398015.1	9708	958	94.406	143	8	0	2	144	756	898	1.64e-75	251	97.20
dermatan-sulfate epimerase	Neomonachus schauinslandi	XP_021548847.1	29088	958	94.406	143	8	0	2	144	756	898	1.21e-75	251	97.20
dermatan-sulfate epimerase	Octodon degus	XP_004648440.2	10160	787	93.75	144	9	0	1	144	584	727	1.77e-74	246	95.83
PREDICTED: dermatan-sulfate epimerase isoform X1	Orcinus orca	XP_004264746.1	9733	960	93.151	146	8	1	1	144	755	900	7.61e-76	252	95.21
PREDICTED: dermatan-sulfate epimerase isoform X1	Tursiops truncatus	XP_019785164.1	9739	960	93.151	146	8	1	1	144	755	900	7.93e-76	252	95.21
dermatan-sulfate epimerase isoform X1	Delphinapterus leucas	XP_022410577.1	9749	960	93.151	146	8	1	1	144	755	900	7.93e-76	252	95.21
dermatan-sulfate epimerase isoform X1	Myotis lucifugus	XP_006089233.1	59463	960	93.151	146	8	1	1	144	755	900	1.87e-77	256	94.52
PREDICTED: dermatan-sulfate epimerase isoform X2	Balaenoptera acutorostrata scammoni	XP_007190799.1	310752	959	93.103	145	9	1	1	144	755	899	1.05e-75	251	94.48
PREDICTED: dermatan-sulfate epimerase	Orycteropus afer afer	XP_007952263.1	1230840	959	93.103	145	9	1	1	144	755	899	5.20e-76	252	95.17
PREDICTED: dermatan-sulfate epimerase	Miniopterus natalensis	XP_016054182.1	291302	996	93.056	144	9	1	1	144	794	936	5.04e-82	269	95.83
PREDICTED: dermatan-sulfate epimerase isoform X1	Myotis brandtii	XP_005884747.1	109478	961	92.517	147	8	1	1	144	755	901	2.70e-77	256	93.88
dermatan-sulfate epimerase isoform X1	Neophocaena asiaeorientalis asiaeorientalis	XP_024612465.1	1706337	961	92.517	147	8	2	1	144	755	901	2.48e-74	248	94.56
PREDICTED: dermatan-sulfate epimerase isoform X1	Myotis davidii	XP_006756949.1	225400	960	92.466	146	9	1	1	144	755	900	3.38e-76	253	93.84
dermatan-sulfate epimerase isoform X1	Canis lupus familiaris	XP_533477.2	9615	959	92.414	145	10	1	1	144	755	899	2.02e-75	251	94.48
PREDICTED: dermatan-sulfate epimerase isoform X1	Ailuropoda melanoleuca	XP_019660279.1	9646	959	92.414	145	10	1	1	144	755	899	8.78e-76	252	94.48
PREDICTED: dermatan-sulfate epimerase isoform X1	Chinchilla lanigera	XP_005409808.1	34839	959	92.414	145	10	1	1	144	755	899	2.98e-75	250	93.79
PREDICTED: dermatan-sulfate epimerase	Chrysochloris asiatica	XP_006839974.1	185453	959	92.414	145	10	1	1	144	755	899	8.09e-76	252	95.86
PREDICTED: dermatan-sulfate epimerase isoform X1	Nannospalax galili	XP_008850413.1	1026970	959	92.414	145	10	1	1	144	755	899	1.54e-75	251	93.79
PREDICTED: dermatan-sulfate epimerase isoform X2	Manis javanica	XP_017508989.1	9974	956	92.361	144	9	2	1	144	755	896	2.17e-80	264	95.83
PREDICTED: dermatan-sulfate epimerase	Panthera tigris altaica	XP_007078764.1	74533	956	92.361	144	9	2	1	143	755	897	4.06e-73	244	93.75
PREDICTED: dermatan-sulfate epimerase	Eptesicus fuscus	XP_008157652.1	29078	979	91.781	146	10	1	1	144	774	919	1.13e-77	257	95.21
dermatan-sulfate epimerase isoform X2	Pteropus alecto	XP_006926164.1	9402	959	91.724	145	11	1	1	144	755	899	3.44e-75	250	93.79
PREDICTED: dermatan-sulfate epimerase isoform X1	Rousettus aegyptiacus	XP_016019128.1	9407	959	91.724	145	11	1	1	144	755	899	3.69e-75	250	93.79
dermatan-sulfate epimerase	Desmodus rotundus	XP_024407598.1	9430	957	91.724	145	9	2	1	144	755	897	4.73e-73	244	93.10
dermatan-sulfate epimerase isoform X1	Odocoileus virginianus texanus	XP_020750053.1	9880	959	91.724	145	11	1	1	144	755	899	1.23e-78	259	96.55
PREDICTED: dermatan-sulfate epimerase	Ochotona princeps	XP_004580362.1	9978	959	91.724	145	11	1	1	144	755	899	1.96e-75	251	93.79
PREDICTED: dermatan-sulfate epimerase	Galeopterus variegatus	XP_008573848.1	482537	772	91.724	145	11	1	1	144	568	712	1.96e-74	245	93.79
LOW QUALITY PROTEIN: dermatan-sulfate epimerase	Loxodonta africana	XP_003404320.1	9785	956	91.667	144	10	1	1	144	755	896	2.46e-73	245	95.14
dermatan sulfate epimerase variant 1	Castor fiber	AOY33853.1	10185	823	91.667	144	11	1	1	144	621	763	1.39e-76	252	95.14
LOW QUALITY PROTEIN: dermatan-sulfate epimerase	Castor canadensis	XP_020031607.1	51338	957	91.667	144	11	1	1	144	755	897	1.86e-76	253	95.14
PREDICTED: dermatan-sulfate epimerase	Pantholops hodgsonii	XP_005965074.1	59538	960	91.096	146	11	1	1	144	755	900	1.12e-75	251	95.21
PREDICTED: dermatan-sulfate epimerase	Oryctolagus cuniculus	XP_002714963.2	9986	959	91.034	145	12	1	1	144	755	899	1.74e-74	248	93.10
PREDICTED: dermatan-sulfate epimerase isoform X1	Cricetulus griseus	XP_016831897.1	10029	959	91.034	145	12	1	1	144	755	899	9.86e-77	254	95.86
PREDICTED: dermatan-sulfate epimerase	Elephantulus edwardii	XP_006879083.1	28737	959	91.034	145	12	1	1	144	755	899	1.49e-73	246	93.10
dermatan-sulfate epimerase	Pteropus vampyrus	XP_023389138.1	132908	929	91.034	145	12	1	1	144	725	869	1.59e-74	248	93.79
PREDICTED: dermatan-sulfate epimerase isoform X1	Hipposideros armiger	XP_019523850.1	186990	959	91.034	145	12	1	1	144	755	899	2.07e-73	245	93.79
dermatan-sulfate epimerase isoform X1	Heterocephalus glaber	XP_004869129.1	10181	962	90.541	148	10	2	1	144	755	902	1.23e-73	246	92.57
PREDICTED: dermatan-sulfate epimerase isoform X2	Ursus maritimus	XP_008689413.1	29073	918	90.476	147	11	1	1	144	712	858	3.51e-74	247	93.88
PREDICTED: dermatan-sulfate epimerase	Sorex araneus	XP_004621816.1	42254	958	90.411	146	10	3	1	144	755	898	4.40e-71	239	91.78
PREDICTED: dermatan-sulfate epimerase isoform X1	Lipotes vexillifer	XP_007455054.1	118797	960	90.411	146	12	1	1	144	755	900	2.81e-73	245	93.84
PREDICTED: dermatan-sulfate epimerase isoform X1	Capra hircus	XP_017908526.1	9925	959	90.345	145	13	1	1	144	755	899	2.02e-75	251	94.48
PREDICTED: dermatan-sulfate epimerase isoform X1	Ovis aries musimon	XP_012017880.1	9938	959	90.345	145	13	1	1	144	755	899	2.19e-75	251	94.48
PREDICTED: dermatan-sulfate epimerase isoform X1	Ovis aries	XP_012037932.1	9940	959	90.345	145	13	1	1	144	755	899	2.19e-75	251	94.48
LOW QUALITY PROTEIN: dermatan-sulfate epimerase	Cavia porcellus	XP_023419413.1	10141	960	90.278	144	13	1	1	144	758	900	2.67e-73	245	92.36
dermatan-sulfate epimerase	Enhydra lutris kenyoni	XP_022376008.1	391180	962	89.928	139	10	1	1	135	755	893	2.27e-69	234	93.53
PREDICTED: dermatan-sulfate epimerase	Condylura cristata	XP_004673846.1	143302	960	89.796	147	11	2	1	144	755	900	9.43e-71	238	91.84
PREDICTED: dermatan-sulfate epimerase	Echinops telfairi	XP_004702070.1	9371	959	89.655	145	14	1	1	144	755	899	1.65e-74	248	93.10
dermatan-sulfate epimerase precursor	Bos taurus	NP_001106703.1	9913	959	89.655	145	14	1	1	144	755	899	4.01e-75	250	94.48
hypothetical protein A6R68_03166	Neotoma lepida	OBS68296.1	56216	841	89.655	145	13	2	1	144	638	781	9.45e-74	244	94.48
PREDICTED: dermatan-sulfate epimerase	Bos mutus	XP_005907458.1	72004	959	89.655	145	14	1	1	144	755	899	3.37e-75	250	94.48
dermatan-sulfate epimerase isoform X1	Trichechus manatus latirostris	XP_004372544.1	127582	959	89.655	145	14	1	1	144	755	899	1.37e-72	243	94.48
PREDICTED: dermatan-sulfate epimerase isoform X1	Bos indicus	XP_019822730.1	9915	959	89.655	145	14	1	1	144	755	899	2.42e-82	250	94.48
dermatan-sulfate epimerase isoform X1	Sus scrofa	XP_005659456.2	9823	957	89.583	144	14	1	1	144	755	897	1.50e-72	243	93.06
dermatan-sulfate epimerase precursor	Rattus norvegicus	NP_001102403.1	10116	958	88.966	145	14	2	1	144	755	898	1.31e-76	254	93.79
PREDICTED: dermatan-sulfate epimerase isoform X1	Bison bison bison	XP_010860127.1	43346	959	88.966	145	15	1	1	144	755	899	1.75e-74	248	94.48
PREDICTED: dermatan-sulfate epimerase isoform X1	Peromyscus maniculatus bairdii	XP_006984382.1	230844	958	88.966	145	14	2	1	144	755	898	2.98e-67	228	93.79
PREDICTED: dermatan-sulfate epimerase isoform X1	Dipodomys ordii	XP_012888283.1	10020	962	88.514	148	13	1	1	144	755	902	2.11e-74	248	91.89
PREDICTED: dermatan-sulfate epimerase isoform X1	Fukomys damarensis	XP_010612344.1	885580	961	88.435	147	14	1	1	144	755	901	2.77e-72	242	93.88
dermatan-sulfate epimerase isoform X2	Mesocricetus auratus	XP_005073329.1	10036	960	88.356	146	15	2	1	144	755	900	3.23e-70	236	94.52
dermatan-sulfate epimerase isoform X1	Carlito syrichta	XP_008053463.1	1868482	958	88.194	144	17	0	1	144	755	898	6.95e-70	236	91.67
dermatan-sulfate epimerase	Mus caroli	XP_021030101.1	10089	958	87.586	145	16	2	1	144	755	898	2.63e-75	250	93.10
dermatan-sulfate epimerase precursor	Mus musculus	NP_766096.1	10090	958	87.586	145	16	2	1	144	755	898	5.10e-76	252	93.79
PREDICTED: dermatan-sulfate epimerase isoform X1	Bubalus bubalis	XP_006055738.1	89462	959	87.586	145	17	1	1	144	755	899	2.27e-73	245	93.10
dermatan-sulfate epimerase	Meriones unguiculatus	XP_021506893.1	10047	957	87.5	144	17	1	1	144	755	897	8.46e-71	238	92.36
PREDICTED: dermatan-sulfate epimerase	Jaculus jaculus	XP_004660707.1	51337	959	87.075	147	14	2	1	144	755	899	1.11e-71	241	91.16
dermatan-sulfate epimerase	Mus pahari	XP_021060981.1	10093	958	86.897	145	17	2	1	144	755	898	1.88e-74	248	91.72
PREDICTED: dermatan-sulfate epimerase	Microtus ochrogaster	XP_005363577.1	79684	959	86.897	145	18	1	1	144	755	899	7.55e-71	238	92.41
PREDICTED: dermatan-sulfate epimerase isoform X2	Mustela putorius furo	XP_004753607.1	9669	963	85.906	149	16	1	1	144	755	903	6.38e-72	241	91.28
dermatan-sulfate epimerase isoform X1	Phascolarctos cinereus	XP_020827265.1	38626	963	84.459	148	18	1	2	144	756	903	8.49e-71	238	91.22
PREDICTED: dermatan-sulfate epimerase	Cariama cristata	XP_009705315.1	54380	959	83.582	134	21	1	2	134	756	889	3.47e-61	212	90.30
dermatan-sulfate epimerase isoform X1	Sarcophilus harrisii	XP_003769426.1	9305	965	83.333	150	18	1	2	144	756	905	2.26e-69	234	88.67
PREDICTED: dermatan-sulfate epimerase	Opisthocomus hoazin	XP_009943159.1	30419	959	82.639	144	24	1	2	144	756	899	2.64e-70	237	89.58
PREDICTED: dermatan-sulfate epimerase	Egretta garzetta	XP_009643512.1	188379	959	82.639	144	24	1	2	144	756	899	4.35e-70	236	89.58
PREDICTED: dermatan-sulfate epimerase	Apteryx australis mantelli	XP_013814587.1	202946	959	82.639	144	24	1	2	144	756	899	4.81e-70	236	89.58
Dermatan-sulfate epimerase, partial	Podiceps cristatus	KFZ64395.1	345573	819	82.517	143	25	0	2	144	617	759	1.46e-70	236	89.51
PREDICTED: dermatan-sulfate epimerase	Cuculus canorus	XP_009560529.1	55661	959	82.09	134	23	1	2	134	756	889	1.79e-64	221	89.55
PREDICTED: dermatan-sulfate epimerase isoform X1	Calidris pugnax	XP_014820252.1	198806	957	82.09	134	23	1	2	134	754	887	1.72e-63	218	88.81
PREDICTED: dermatan-sulfate epimerase	Pelecanus crispus	XP_009482180.1	36300	959	82.069	145	25	1	1	144	755	899	6.24e-67	228	88.97
PREDICTED: dermatan-sulfate epimerase isoform X1	Tinamus guttatus	XP_010220609.1	94827	960	82.069	145	24	1	2	144	756	900	1.39e-65	224	88.28
PREDICTED: dermatan-sulfate epimerase	Lepidothrix coronata	XP_017685923.1	321398	960	82.069	145	24	1	2	144	756	900	2.10e-65	223	88.28
PREDICTED: dermatan-sulfate epimerase	Chaetura pelagica	XP_010003086.1	8897	959	81.944	144	25	1	2	144	756	899	9.05e-70	235	88.89
PREDICTED: dermatan-sulfate epimerase isoform X1	Haliaeetus albicilla	XP_009912151.1	8969	959	81.944	144	25	1	2	144	756	899	1.29e-69	235	88.89
dermatan-sulfate epimerase isoform X1	Gallus gallus	XP_419777.3	9031	959	81.944	144	25	1	2	144	756	899	4.72e-65	223	88.89
hypothetical protein CIB84_004389	Bambusicola thoracicus	POI31860.1	9083	826	81.944	144	25	1	2	144	623	766	8.14e-69	231	88.89
PREDICTED: dermatan-sulfate epimerase isoform X1	Meleagris gallopavo	XP_003204312.1	9103	959	81.944	144	25	1	2	144	756	899	8.14e-65	222	88.89
PREDICTED: dermatan-sulfate epimerase	Phalacrocorax carbo	XP_009502694.1	9209	959	81.944	144	25	1	2	144	756	899	9.62e-70	235	88.89
dermatan-sulfate epimerase	Amazona aestiva	KQK80073.1	12930	1029	81.944	144	25	1	2	144	826	969	3.05e-68	232	88.89
PREDICTED: dermatan-sulfate epimerase	Fulmarus glacialis	XP_009575802.1	30455	959	81.944	144	25	1	2	144	756	899	3.72e-69	234	88.89
PREDICTED: dermatan-sulfate epimerase	Gavia stellata	XP_009811920.1	37040	959	81.944	144	25	1	2	144	756	899	4.72e-66	225	88.89
Dermatan-sulfate epimerase	Cathartes aura	KFP56465.1	43455	959	81.944	144	25	1	2	144	756	899	1.96e-65	223	88.89
PREDICTED: dermatan-sulfate epimerase	Charadrius vociferus	XP_009879413.1	50402	957	81.944	144	25	1	2	144	754	897	6.82e-70	236	88.89
PREDICTED: dermatan-sulfate epimerase	Eurypyga helias	XP_010146266.1	54383	959	81.944	144	25	1	2	144	756	899	1.75e-69	234	89.58
PREDICTED: dermatan-sulfate epimerase	Apaloderma vittatum	XP_009876748.1	57397	959	81.944	144	25	1	2	144	756	899	2.53e-68	231	88.19
PREDICTED: dermatan-sulfate epimerase	Merops nubicus	XP_008944913.1	57421	959	81.944	144	25	1	2	144	756	899	2.66e-69	234	88.89
PREDICTED: dermatan-sulfate epimerase isoform X1	Coturnix japonica	XP_015714102.1	93934	959	81.944	144	25	1	2	144	756	899	3.03e-65	223	88.89
PREDICTED: dermatan-sulfate epimerase	Balearica regulorum gibbericeps	XP_010297176.1	100784	959	81.944	144	25	1	2	144	756	899	4.37e-69	233	88.19
PREDICTED: dermatan-sulfate epimerase	Tauraco erythrolophus	XP_009981306.1	121530	959	81.944	144	25	1	2	144	756	899	1.81e-69	234	88.89
PREDICTED: dermatan-sulfate epimerase	Nipponia nippon	XP_009458801.1	128390	959	81.944	144	25	1	2	144	756	899	1.98e-69	234	88.89
PREDICTED: dermatan-sulfate epimerase	Chlamydotis macqueenii	XP_010124014.1	187382	959	81.944	144	25	1	2	144	756	899	1.81e-69	234	88.89
PREDICTED: dermatan-sulfate epimerase isoform X1	Aquila chrysaetos canadensis	XP_011579789.1	216574	959	81.944	144	25	1	2	144	756	899	1.81e-69	234	88.89
PREDICTED: dermatan-sulfate epimerase	Pterocles gutturalis	XP_010076348.1	240206	959	81.944	144	25	1	2	144	756	899	1.98e-69	234	88.89
PREDICTED: dermatan-sulfate epimerase	Antrostomus carolinensis	XP_010169946.1	279965	959	81.944	144	25	1	2	144	756	899	1.42e-69	235	88.89
dermatan-sulfate epimerase	Patagioenas fasciata monilis	OPJ73157.1	372326	993	81.944	144	25	1	2	144	790	933	2.38e-69	234	88.89
PREDICTED: dermatan-sulfate epimerase	Anser cygnoides domesticus	XP_013031014.1	381198	959	81.944	144	25	1	2	144	756	899	3.32e-65	223	88.89
PREDICTED: dermatan-sulfate epimerase	Haliaeetus leucocephalus	XP_010571735.1	52644	959	81.944	144	25	1	2	144	756	899	8.63e-77	235	88.89
Dermatan-sulfate epimerase, partial	Phoenicopterus ruber ruber	KFQ86291.1	9218	739	81.818	143	26	0	2	144	537	679	1.97e-71	237	88.81
PREDICTED: dermatan-sulfate epimerase	Erinaceus europaeus	XP_007521104.1	9365	960	81.757	148	21	3	1	144	755	900	7.90e-62	214	85.81
PREDICTED: dermatan-sulfate epimerase	Nestor notabilis	XP_010016904.1	176057	961	81.507	146	24	2	2	144	756	901	1.57e-67	229	87.67
PREDICTED: dermatan-sulfate epimerase	Ficedula albicollis	XP_005043553.1	59894	959	81.379	145	24	2	2	144	756	899	1.30e-63	218	88.97
PREDICTED: dermatan-sulfate epimerase	Leptosomus discolor	XP_009945912.1	188344	960	81.379	145	25	1	2	144	756	900	2.47e-65	223	87.59
PREDICTED: dermatan-sulfate epimerase	Manacus vitellinus	XP_008929647.1	328815	960	81.379	145	25	1	2	144	756	900	4.26e-65	223	88.28
dermatan-sulfate epimerase isoform X1	Corvus cornix cornix	XP_010400933.1	932674	960	81.379	145	25	1	2	144	756	900	5.15e-65	222	88.28
dermatan-sulfate epimerase isoform X2	Anas platyrhynchos	XP_012960237.1	8839	959	81.25	144	26	1	2	144	756	899	3.25e-65	223	88.89
dermatan-sulfate epimerase isoform X1	Columba livia	XP_013224083.1	8932	959	81.25	144	26	1	2	144	756	899	2.38e-69	234	88.89
hypothetical protein ASZ78_013980	Callipepla squamata	OXB61935.1	9009	1132	81.25	144	26	1	2	144	929	1072	1.31e-63	219	88.19
PREDICTED: dermatan-sulfate epimerase	Melopsittacus undulatus	XP_005154756.1	13146	959	81.25	144	26	1	2	144	756	899	6.00e-68	230	87.50
PREDICTED: dermatan-sulfate epimerase	Geospiza fortis	XP_005418495.1	48883	958	81.25	144	25	2	2	144	756	898	5.18e-63	217	88.19
PREDICTED: dermatan-sulfate epimerase	Picoides pubescens	XP_009895692.1	118200	959	81.25	144	26	1	2	144	756	899	2.85e-65	223	88.89
PREDICTED: dermatan-sulfate epimerase	Zonotrichia albicollis	XP_005490743.1	44394	957	81.119	143	26	1	2	144	756	897	2.76e-68	231	88.81
PREDICTED: dermatan-sulfate epimerase isoform X1	Parus major	XP_015477012.1	9157	959	80.69	145	25	2	2	144	756	899	6.13e-63	217	87.59
PREDICTED: dermatan-sulfate epimerase	Mesitornis unicolor	XP_010193407.1	54374	960	80.69	145	26	1	2	144	756	900	8.46e-66	224	88.28
PREDICTED: dermatan-sulfate epimerase	Tyto alba	XP_009969178.1	56313	960	80.69	145	26	1	2	144	756	900	1.75e-65	224	87.59
PREDICTED: dermatan-sulfate epimerase isoform X1	Corvus brachyrhynchos	XP_008636006.1	85066	960	80.69	145	26	1	2	144	756	900	1.64e-64	221	88.28
PREDICTED: dermatan-sulfate epimerase	Pseudopodoces humilis	XP_005518350.1	181119	959	80.69	145	25	2	2	144	756	899	4.22e-62	214	86.90
hypothetical protein H355_014525, partial	Colinus virginianus	OXB76481.1	9014	1158	80.556	144	27	1	2	144	955	1098	1.83e-63	219	88.19
PREDICTED: dermatan-sulfate epimerase	Aptenodytes forsteri	XP_009287413.1	9233	959	80.556	144	27	1	2	144	756	899	4.95e-64	219	87.50
PREDICTED: dermatan-sulfate epimerase	Pygoscelis adeliae	XP_009323942.1	9238	959	80.556	144	27	1	2	144	756	899	4.80e-64	220	87.50
PREDICTED: dermatan-sulfate epimerase	Calypte anna	XP_008495572.1	9244	959	80.556	144	27	1	2	144	756	899	4.47e-68	231	87.50
PREDICTED: dermatan-sulfate epimerase	Phaethon lepturus	XP_010284381.1	97097	958	80.42	143	28	0	2	144	756	898	1.32e-60	210	88.81
dermatan-sulfate epimerase isoform X1	Cyanistes caeruleus	XP_023779741.1	156563	957	80.42	143	27	1	2	144	756	897	8.01e-68	230	88.81
PREDICTED: dermatan-sulfate epimerase	Falco peregrinus	XP_005243791.1	8954	960	80	145	27	1	2	144	756	900	3.14e-65	223	87.59
dermatan-sulfate epimerase isoform X1	Numida meleagris	XP_021245586.1	8996	960	80	145	27	1	2	144	756	900	1.00e-64	221	86.90
PREDICTED: dermatan-sulfate epimerase isoform X1	Serinus canaria	XP_009091041.1	9135	959	80	145	26	2	2	144	756	899	1.99e-62	215	87.59
PREDICTED: dermatan-sulfate epimerase	Acanthisitta chloris	XP_009068501.1	57068	960	80	145	27	1	2	144	756	900	4.41e-64	220	87.59
PREDICTED: dermatan-sulfate epimerase, partial	Buceros rhinoceros silvestris	XP_010140156.1	175836	587	80	145	27	1	2	144	383	527	7.55e-66	219	87.59
PREDICTED: dermatan-sulfate epimerase isoform X1	Struthio camelus australis	XP_009679990.1	441894	960	80	145	27	1	2	144	756	900	5.31e-65	222	87.59
dermatan-sulfate epimerase	Lonchura striata domestica	XP_021411186.1	299123	957	79.72	143	28	1	2	144	756	897	3.63e-67	228	87.41
PREDICTED: dermatan-sulfate epimerase isoform X2	Sturnus vulgaris	XP_014748150.1	9172	959	79.31	145	27	2	2	144	756	899	1.02e-61	213	86.90
PREDICTED: dermatan-sulfate epimerase	Falco cherrug	XP_005445758.1	345164	960	79.31	145	28	1	2	144	756	900	4.80e-65	223	87.59
dermatan-sulfate epimerase isoform X2	Chrysemys picta bellii	XP_005306419.1	8478	959	79.167	144	29	1	2	144	756	899	5.43e-63	217	88.89
dermatan-sulfate epimerase isoform X2	Terrapene mexicana triunguis	XP_024056256.1	1415176	958	79.021	143	30	0	2	144	756	898	1.89e-64	221	89.51
PREDICTED: dermatan-sulfate epimerase isoform X1	Monodelphis domestica	XP_001369104.1	13616	962	78.912	147	27	2	2	144	756	902	5.56e-68	231	89.12
PREDICTED: dermatan-sulfate epimerase	Taeniopygia guttata	XP_002191507.1	59729	959	78.621	145	28	2	2	144	756	899	4.22e-62	214	86.21
PREDICTED: dermatan-sulfate epimerase	Colius striatus	XP_010195365.1	57412	960	78.519	135	27	1	2	134	756	890	8.96e-58	202	87.41
PREDICTED: dermatan-sulfate epimerase	Chelonia mydas	XP_007057486.1	8469	990	76.923	143	33	0	2	144	788	930	1.22e-56	199	87.41
dermatan-sulfate epimerase isoform X1	Pogona vitticeps	XP_020666499.1	103695	958	76.923	143	33	0	2	144	756	898	1.11e-61	213	86.01
PREDICTED: dermatan-sulfate epimerase	Gekko japonicus	XP_015264554.1	146911	956	76.923	143	31	1	2	144	756	896	5.09e-60	209	86.71
dermatan-sulfate epimerase isoform X4	Pelodiscus sinensis	XP_025040539.1	13735	1124	76.224	143	33	1	2	144	923	1064	1.74e-64	222	86.01
PREDICTED: dermatan-sulfate epimerase isoform X1	Anolis carolinensis	XP_016853226.1	28377	958	76.224	143	34	0	2	144	756	898	6.68e-60	208	83.92
PREDICTED: dermatan-sulfate epimerase isoform X2	Alligator mississippiensis	XP_006258974.1	8496	960	75.862	145	33	1	2	144	756	900	2.13e-59	207	83.45
PREDICTED: dermatan-sulfate epimerase-like	Crocodylus porosus	XP_019393733.1	8502	1428	75.862	145	33	1	2	144	1224	1368	4.19e-60	210	84.14
dermatan-sulfate epimerase isoform X5	Alligator sinensis	XP_025062828.1	38654	990	75.862	145	33	1	2	144	786	930	2.77e-60	209	84.14
PREDICTED: dermatan-sulfate epimerase	Protobothrops mucrosquamatus	XP_015677061.1	103944	956	75.524	143	33	1	2	144	756	896	1.66e-60	210	83.92
PREDICTED: dermatan-sulfate epimerase isoform X1	Gavialis gangeticus	XP_019375608.1	94835	960	75.172	145	34	1	2	144	756	900	3.09e-60	209	84.14
dermatan-sulfate epimerase isoform X1	Python bivittatus	XP_007429116.1	176946	956	73.427	143	36	1	2	144	756	896	1.12e-54	194	82.52
PREDICTED: dermatan-sulfate epimerase-like	Thamnophis sirtalis	XP_013918453.1	35019	912	72.917	144	37	1	1	144	711	852	2.97e-59	206	82.64
Dermatan-sulfate epimerase	Ophiophagus hannah	ETE61714.1	8665	623	72.727	143	37	1	2	144	423	563	2.45e-59	202	83.92
dermatan-sulfate epimerase precursor	Xenopus tropicalis	NP_001120268.1	8364	955	64.706	136	46	1	2	137	756	889	4.15e-41	155	79.41
PREDICTED: LOW QUALITY PROTEIN: dermatan-sulfate epimerase	Ornithorhynchus anatinus	XP_003428770.2	9258	833	63.699	146	49	1	2	143	629	774	2.59e-46	170	79.45
PREDICTED: dermatan-sulfate epimerase-like isoform X1	Xenopus laevis	XP_018118770.1	8355	956	61.538	143	53	1	2	144	756	896	6.34e-49	177	76.92
hypothetical protein AB205_0210300, partial	Rana catesbeiana	PIO33850.1	8400	651	61.538	143	52	2	2	144	452	591	4.78e-48	173	77.62
PREDICTED: dermatan-sulfate epimerase isoform X1	Nanorana parkeri	XP_018419375.1	125878	955	57.343	143	58	2	2	144	756	895	1.48e-44	165	74.83
PREDICTED: dermatan-sulfate epimerase isoform X1	Latimeria chalumnae	XP_006009113.1	7897	956	56.25	144	59	2	2	144	756	896	1.10e-34	137	68.75
dermatan-sulfate epimerase isoform X1	Cynoglossus semilaevis	XP_008310865.1	244447	958	49.624	133	61	3	2	133	761	888	4.83e-30	124	66.92
dermatan-sulfate epimerase isoform X2	Salvelinus alpinus	XP_023855680.1	8036	958	47.015	134	64	5	2	134	761	888	5.05e-25	109	67.16
dermatan-sulfate epimerase	Fundulus heteroclitus	XP_012709549.1	8078	956	46.809	141	69	3	2	141	758	893	3.99e-29	121	65.25
PREDICTED: dermatan-sulfate epimerase	Haplochromis burtoni	XP_005931090.1	8153	956	46.207	145	71	4	2	144	758	897	1.59e-29	122	65.52
PREDICTED: dermatan-sulfate epimerase-like	Neolamprologus brichardi	XP_006796308.1	32507	956	46.207	145	71	4	2	144	758	897	2.11e-29	122	65.52
dermatan-sulfate epimerase isoform X1	Maylandia zebra	XP_004566267.1	106582	956	46.207	145	71	4	2	144	758	897	2.61e-29	122	65.52
PREDICTED: dermatan-sulfate epimerase	Pundamilia nyererei	XP_005745800.1	303518	956	46.207	145	71	4	2	144	758	897	2.61e-29	122	65.52
unnamed protein product	Tetraodon nigroviridis	CAF93486.1	99883	915	45.946	111	57	1	2	112	756	863	1.47e-22	102	68.47
PREDICTED: dermatan-sulfate epimerase isoform X1	Lepisosteus oculatus	XP_006626226.1	7918	956	45.833	144	74	2	2	144	756	896	4.72e-28	118	63.89
dermatan-sulfate epimerase isoform X1	Oryzias latipes	XP_011490360.1	8090	954	45.833	144	72	3	2	144	756	894	2.96e-29	121	65.97
dermatan-sulfate epimerase isoform X1	Rhincodon typus	XP_020375792.1	259920	957	45.833	144	75	2	2	144	756	897	7.19e-23	103	63.19
PREDICTED: dermatan-sulfate epimerase	Nothobranchius furzeri	XP_015831696.1	105023	955	45.714	140	71	2	2	141	758	892	2.31e-28	119	67.86
PREDICTED: LOW QUALITY PROTEIN: dermatan-sulfate epimerase	Lates calcarifer	XP_018555188.1	8187	960	45.517	145	72	4	2	144	762	901	3.69e-26	112	64.83
dermatan-sulfate epimerase	Seriola dumerili	XP_022626064.1	41447	964	45.517	145	72	4	2	144	766	905	5.55e-26	112	65.52
PREDICTED: dermatan-sulfate epimerase isoform X1	Stegastes partitus	XP_008296441.1	144197	956	45.517	145	72	4	2	144	758	897	6.95e-25	109	65.52
dermatan-sulfate epimerase	Seriola lalandi dorsalis	XP_023286278.1	1841481	963	45.517	145	72	4	2	144	765	904	6.74e-26	112	65.52
putative dermatan-sulfate epimerase	Scophthalmus maximus	AWP19602.1	52904	1353	45.324	139	70	3	2	139	1155	1288	2.61e-25	110	64.75
PREDICTED: dermatan-sulfate epimerase isoform X1	Cyprinodon variegatus	XP_015254167.1	28743	955	45.139	144	72	4	2	144	758	895	1.05e-25	111	65.97
PREDICTED: dermatan-sulfate epimerase-like	Salmo salar	XP_014060468.1	8030	958	44.928	138	67	5	2	137	761	891	9.20e-25	108	66.67
PREDICTED: dermatan-sulfate epimerase isoform X1	Oreochromis niloticus	XP_005457970.1	8128	956	44.828	145	73	4	2	144	758	897	1.82e-27	116	64.14
dermatan-sulfate epimerase	Amphiprion ocellaris	XP_023152741.1	80972	956	44.828	145	73	4	2	144	758	897	1.60e-24	108	64.83
PREDICTED: dermatan-sulfate epimerase isoform X1	Scleropages formosus	XP_018599405.1	113540	953	44.828	145	67	5	2	143	758	892	9.31e-24	106	60.00
dermatan-sulfate epimerase-like isoform X1	Oncorhynchus tshawytscha	XP_024233612.1	74940	959	44.776	134	68	5	2	134	761	889	7.62e-23	103	64.93
PREDICTED: dermatan-sulfate epimerase isoform X1	Esox lucius	XP_010881155.1	8010	960	44.444	144	76	3	2	144	760	900	3.61e-19	92.8	64.58
dermatan-sulfate epimerase isoform X1	Oryzias melastigma	XP_024147552.1	30732	970	44.444	144	74	3	2	144	772	910	1.70e-27	116	63.89
PREDICTED: dermatan-sulfate epimerase isoform X1	Larimichthys crocea	XP_010745938.1	215358	961	44.444	144	74	3	2	144	763	901	4.60e-24	107	64.58
PREDICTED: dermatan-sulfate epimerase	Callorhinchus milii	XP_007897828.1	7868	958	44.218	147	74	4	2	144	756	898	2.98e-26	113	65.99
dermatan-sulfate epimerase	Acanthochromis polyacanthus	XP_022049477.1	80966	956	44.138	145	74	4	2	144	758	897	4.92e-24	107	64.83
dermatan-sulfate epimerase isoform X1	Xiphophorus maculatus	XP_023203001.1	8083	968	43.972	141	73	3	2	141	758	893	9.34e-27	114	65.96
PREDICTED: dermatan-sulfate epimerase	Takifugu rubripes	XP_003977355.1	31033	954	43.972	141	73	3	2	141	756	891	4.59e-24	107	63.12
hypothetical protein CCH79_00020035	Gambusia affinis	PWA29900.1	33528	828	43.972	141	73	3	2	141	630	765	1.13e-26	114	66.67
PREDICTED: dermatan-sulfate epimerase isoform X1	Paralichthys olivaceus	XP_019947045.1	8255	959	43.75	144	75	3	2	144	761	899	1.27e-24	108	63.89
dermatan-sulfate epimerase isoform X1	Kryptolebias marmoratus	XP_017288261.1	37003	956	43.75	144	75	3	2	144	758	896	7.08e-25	109	63.19
LOW QUALITY PROTEIN: dermatan-sulfate epimerase-like	Oncorhynchus kisutch	XP_020351981.1	8019	959	43.357	143	72	5	2	141	760	896	5.62e-21	98.2	64.34
dermatan-sulfate epimerase-like	Oncorhynchus mykiss	XP_021455935.1	8022	959	43.284	134	70	5	2	134	761	889	2.22e-21	99.4	63.43
PREDICTED: dermatan-sulfate epimerase	Austrofundulus limnaeus	XP_013882360.1	52670	914	43.056	144	76	4	2	144	716	854	8.67e-24	106	65.28
dermatan-sulfate epimerase isoform X1	Labrus bergylta	XP_020492318.1	56723	957	43.056	144	76	3	2	144	759	897	7.90e-24	106	63.19
dermatan-sulfate epimerase isoform X1	Monopterus albus	XP_020468577.1	43700	957	42.759	145	76	4	2	144	759	898	4.19e-22	101	62.76
PREDICTED: dermatan-sulfate epimerase	Clupea harengus	XP_012676866.1	7950	955	42.647	136	72	3	3	137	758	888	2.79e-22	102	66.18
PREDICTED: dermatan-sulfate epimerase	Notothenia coriiceps	XP_010774740.1	8208	782	42.361	144	77	3	2	144	584	722	1.22e-25	111	62.50
dermatan-sulfate epimerase isoform X1	Paramormyrops kingsleyae	XP_023665957.1	1676925	953	41.958	143	75	4	2	143	757	892	3.43e-21	98.6	61.54
dermatan-sulfate epimerase precursor	Danio rerio	NP_001025396.1	7955	949	41.606	137	68	3	2	137	757	882	6.13e-20	95.1	61.31
PREDICTED: dermatan-sulfate epimerase	Sinocyclocheilus rhinocerous	XP_016421247.1	307959	946	41.606	137	68	3	2	137	754	879	3.27e-20	95.9	61.31
PREDICTED: LOW QUALITY PROTEIN: dermatan-sulfate epimerase-like	Cyprinus carpio	XP_018945377.1	7962	931	41.284	109	55	1	2	110	757	856	1.31e-15	82.8	62.39
PREDICTED: dermatan-sulfate epimerase-like	Poecilia formosa	XP_016521894.1	48698	600	41.135	141	77	3	2	141	402	537	9.33e-21	97.4	61.70
PREDICTED: dermatan-sulfate epimerase	Poecilia latipinna	XP_014882070.1	48699	597	41.135	141	77	3	2	141	399	534	7.96e-21	97.4	61.70
PREDICTED: dermatan-sulfate epimerase, partial	Poecilia mexicana	XP_014834530.1	48701	600	41.135	141	77	3	2	141	402	537	6.44e-21	97.8	61.70
PREDICTED: dermatan-sulfate epimerase isoform X1	Hippocampus comes	XP_019714691.1	109280	953	40.972	144	79	3	2	144	755	893	1.60e-26	114	65.28
PREDICTED: dermatan-sulfate epimerase-like	Sinocyclocheilus grahami	XP_016106169.1	75366	951	40.876	137	71	3	2	137	757	884	2.00e-18	90.9	60.58
PREDICTED: dermatan-sulfate epimerase isoform X1	Sinocyclocheilus anshuiensis	XP_016318286.1	1608454	951	40.876	137	71	3	2	137	757	884	8.06e-19	92.0	60.58
PREDICTED: dermatan-sulfate epimerase isoform X1	Poecilia reticulata	XP_008396810.1	8081	952	40	140	76	3	2	141	758	889	4.38e-19	92.8	60.00
dermatan-sulfate epimerase	Boleophthalmus pectinirostris	XP_020787626.1	150288	948	39.13	138	74	3	2	139	756	883	4.55e-19	92.8	62.32
dermatan-sulfate epimerase	Astyanax mexicanus	XP_022522898.1	7994	952	37.313	134	73	4	2	134	760	883	3.06e-19	93.2	62.69
PREDICTED: dermatan-sulfate epimerase isoform X1	Ictalurus punctatus	XP_017306883.1	7998	935	31.034	58	35	1	2	54	758	815	1.2e-06	36.2	58.62
PREDICTED: dermatan-sulfate epimerase isoform X1	Pygocentrus nattereri	XP_017543621.1	42514	947	27.891	147	79	7	2	141	762	888	1.83e-11	50.4	52.38

## Sheet: QUERY
>aa755-898
LLEKQILSRVRNTASFRKTAERLLRFSDKRQTEEAIDRIFAISQQQQQQSKSKKNRRAGKRYKFVDAVPDIFAQIEVNEKKIRQKAQILAQKELPIDEDEEMKDLLDFADVTYEKHKNGGLIKGRFGQARMVTTTHSRAPSLSA

## Sheet: FASTA
>9606
MRTHTRGAPSVFFIYLLCFVSAYITDENPEVMIPFTNANYDSHPMLYFSRAEVAELQLRAASSHEHIAAR
LTEAVHTMLSSPLEYLPPWDPKDYSARWNEIFGNNLGALAMFCVLYPENIEARDMAKDYMERMAAQPSWL
VKDAPWDEVPLAHSLVGFATAYDFLYNYLSKTQQEKFLEVIANASGYMYETSYRRGWGFQYLHNHQPTNC
MALLTGSLVLMNQGYLQEAYLWTKQVLTIMEKSLVLLREVTDGSLYEGVAYGSYTTRSLFQYMFLVQRHF
NINHFGHPWLKQHFAFMYRTILPGFQRTVAIADSNYNWFYGPESQLVFLDKFVMRNGSGNWLADQIRRNR
VVEGPGTPSKGQRWCTLHTEFLWYDGSLKSVPPPDFGTPTLHYFEDWGVVTYGSALPAEINRSFLSFKSG
KLGGRAIYDIVHRNKYKDWIKGWRNFNAGHEHPDQNSFTFAPNGVPFITEALYGPKYTFFNNVLMFSPAV
SKSCFSPWVGQVTEDCSSKWSKYKHDLAASCQGRVVAAEEKNGVVFIRGEGVGAYNPQLNLKNVQRNLIL
LHPQLLLLVDQIHLGEESPLETAASFFHNVDVPFEETVVDGVHGAFIRQRDGLYKMYWMDDTGYSEKATF
ASVTYPRGYPYNGTNYVNVTMHLRSPITRAAYLFIGPSIDVQSFTVHGDSQQLDVFIATSKHAYATYLWT
GEATGQSAFAQVIADRHKILFDRNSAIKSSIVPEVKDYAAIVEQNLQHFKPVFQLLEKQILSRVRNTASF
RKTAERLLRFSDKRQTEEAIDRIFAISQQQQQQSKSKKNRRAGKRYKFVDAVPDIFAQIEVNEKKIRQKA
QILAQKELPIDEDEEMKDLLDFADVTYEKHKNGGLIKGRFGQARMVTTTHSRAPSLSASYTRLFLILNIA
IFFVMLAMQLTYFQRAQSLHGQRCLYAVLLIDSCILLWLYSSCSQSQC
>10090
MRTHTRGAPSVFFICLLCCVSAFITDENPEVMIPFTNANYDSHPMLYFSRKDVAELQLRAASSHEHIAAR
LTEAVHTMLTNPLEYLPPWDPKEYSARWNEIYGNNLGALAMFCVLYPENTEARDMAKDYMERMAAQPSWL
VKDAPWDEVPLAHSLVGFATAYDFLYNYLSKTQQETFLEVIANASGYMYETSYRRGWGFQYLHNHQPTNC
MALLTGSLILMNQGYLQEAYLWTKQVLSIMEKSLVLLREVTDGSLYEGVAYGSYTTRSLFQYMFLVQRHF
DINHFGHPWLKQHFAFMYRTILPGFQRTVAIADSNYNWFYGPESQLVFLDKFVMRNGSGNWLADQIRRNR
VVEGPGTPSKGQRWCTLHTEFLWYDASLKPVPPPDFGTPTLHYFEDWGVVTYGSALPAEINRSFLSFKSG
KLGGRAIYDIVHRNKYKDWIKGWRNFNAGHEHPDQNSFTFAPNGVPFITEALYGPKYTYFNNVLMFSPAV
SKSCFSPWEGQVTEDCSSKWSKYKHDLAASCQGRVIAADEKDGVVFIRGEGVGAYNPMLNLKHIQRNLIL
LHPQLLLLVDQIHLGEESPLETAASFFHNVDVPFEETVVDGVHGALIRQRDGLYKMYWMDDTGYSEKANF
ASVMYPRGYPYNGTNYVNVTMHLRSPITRAAYLFIGPSVDVQSFSIHGDPQRLDVFIATSEHAYATYLWT
GENTGHSAFAQVIADHQKILFDQSSAIKSTAVPEVKDYAAIVEQNLQHFKPVFQLLEKQILSRVQNTASF
RKTAERLLRFSDKRQTEEAIDRIFAISQQQRQQRGKSKKSRKAGKHYKFVDAVPDIFAQIEVNEKKIRQK
AQVLAQREQPIDEDEEMKDLLDFADVTYEKHKNEGSVKGGFGQVRMVTSHNRAPSLSASYTRLFLILNIA
IFFVMLAMQLTYFQRAQSLHGQRCLYAVLLIDSCVLLWLYSSCSQSQC
>99883
MRTHTRGAPTVFFISLLWPLLAAADLDASGGIPFMGGNYDGHPMLYFSRGDVEEMQYAAAGTHRDMAKRI
RDAGEAMLEHPDEYLPPWSPAEFSARWNEVYGNNLGVLSMFCLLYPHRIGALDLVKDYMERMAAQPSWLV
KDAPWDEVPLAHSLVGFATAYDFMYEYLDKGQQERFLQVIGNASRLMYEKSYVRGWGFQYLHNHQPTNCV
ALLTGSLVYMTQGYLQEAYLWTKQVLSIMEKSMVLLQDVTDGSLYEGVAYGTYTTRSLFQYMFLVQRHFA
IGHFQHPWLFKHFAFLYRTILPGFQRTVAIADSNYNWFYGPESQLVFLDRYVLQNGSGNWLAEIIHQNRV
TEGPGQAGKGQRWCTLHTEFIWYDPGLIPKPPSDFGTSQLHHFEDWGVVTYGSALPADTNRTFLSFKSGK
LGGRAIYDIVHRNKYKDWVKGWRNFNAGHEHPDQNSFTFAPNGVPFITEALYGPKYTLLNNVVLFGSSIS
HSCFKPWAGQVTETCDSKWLKYKVGLAADAQGRVEVAMQRQGMVFIRGEGHSAYDPELKLRSFQRNLLLL
HPQLLLLVDHIHLQTDSPTRAMSAFFHNTDRPFQGTRVDGVHGAFVTHGEDKYKMSWMDDTGYSNKEMLG
YWNYPRGYPYNGSNYVNVTVPLRYPYTRMAYIFFGPGADVQSFSVRGDDQRVDIYLATKDHTYTIYLLTA
EETSKPLHAMVLLDKKKIVFEKSLGAKSDSSPEEVEEYVNVMEDNLQHVKPVFQQMERHILGRVLNTASI
RKTAERLLQFSDKRKTDEVIEKMFAMSKKQGRSKGGKKLNLGEKLAESFPDIFAQIEVNEKKERQRTSKH
SYTDIPEEGDQDLAHLWNIRTATNIKKGSLSRVANLKKFIWGSLQGAGPYRTLPHTSGCFYFSTRPLSSC
CSPSY
>7955
MRTYTRGAPTVFFISALWVLAAPGPAAVDPTGGVAFLGGNYEGTHPMLYFGLTEVEELQRAAIGTHKALA
QQIREAGEAILERPEEYLPPWSPAEFSARWNEVYGNNLGLLSMFCMLYPHRAGALDVAKEYMERMAAQPN
WMVKDAPWDEVPIAHSLVGFATAFDFLYEYLSKGQQERFIQVIGNASRYMYEKSYHRGWGFQYLHNHQPT
NCVALLTGSLVLMNQGYLQEAYLWTKQAISIMEKSMVLLQDVTDGSLYEGVAYGTYTTRSLFQYMYLVQR
HFDIGHFSHPWLQKHFAFLYRTLLPGFQRTVAIADSNYNWFYGPESQLVFLDRYVMRNGSGNWLAEVIRQ
NRVLEGPGQAGRGQRWCTLHTEFLWYDASLRPTPPPDYGTSHLHHFEDWGVVTYGSALPAGKNHTFLSFK
SGKLGGRAIFDIVHQNKYKDWIKGWRNFNAGHEHPDQNSFTFAPNGVPFITEALYGPKYTSLNNAVMFGP
AVSESCFAPWEGQVTEACNSKWLKYKHGQAADCHGQVEAALEQQGMVFIRGEGQAAYNPELKIKNFQRNL
LLLHPQLLLMVDHVELHSGSLTRSMSAFFHNTDLPFLKTQIDGVHGALIRHGNETSKMFWLDDTGSSEKA
VVGYRSYPRGYPYNGSNYVNVTMPLRYPTSRLAYIFFGSGVDVQSFSVHGDSERLEIYLATRDHTYNIYL
FTDQLPTKPMAMVLVDQQKVVFERTAGIKEQPIEEVEEYANVVEDNLQHVKPVFQQLERHILSRVLNTDT
FHKTAERLLKSSDKRKTSGNIQKMFSLSKKKGKGGKKTSFSDSLPDIFAQIEASEKKERQRTVKRVYEEL
PEEGDGDSRAFVDYSDLRKGKKVGFVKGRKFKEVRVGATAESEDVFSTTSYIRLFLISNIATFFVLLAVL
LTRFQRAQSLHTQRCLYCVLLIDSFVLLCLYSSCSQAQC
>9615
MRTHTRGAPSVFFIYLFCFVSAYITDENPEVMIPFTNANYDSHPMLYFSRAEVAELQLRAASSHEHIAAR
LTEAVHTMLSSPLEYLPPWDPKDYSARWNEIYGNNLGALAMFCVLYPENIEARDMAKDYMERMAAQPSWL
VKDAPWDEVPLAHSLVGFATAYDFLYNYLSKTQQEKFLEVIANVSGYMYETSYRRGWGFQYLHNHQPTNC
MALLTGSLVLMNQGYLQEAYLWTKQVLTIMEKSLVLLREVTDGSLYEGVAYGSYTTRSLFQYMFLVQRHF
DINHFGHPWLKQHFAFMYRTILPGFQRTVAIADSNYNWFYGPESQLVFLDKFVMRNGSGNWLADQIRRNR
VTEGPGTPSKGQRWCTLHTEFLWYDASLKSVPPPDFGTPTLHYFEDWGVVTYGSALPAEINRSFLSFKSG
KLGGRAIYDIVHRNKYKDWIKGWRNFNAGHEHPDQNSFTFAPNGVPFITEALYGPKYTFFNNVLMFSPAV
SKSCFSPWEGQVTEDCSSKWSKYKHDLAASCQGRVVAAVEKNGVVFIRGEGVGAYNPQLNLKNVQRNLFL
LHPQLLLLVDQIHLGDKSPLETAASFFHNVDVPFEETVVDGVHGAFIRQRDGLYKMYWMDDTGYSEKATL
ASVTYPRGYPYNGTNYVNVTVRLRSPITRTAYLFIGPSVDVQSFSVHGDAQQLDVFIATSQHAYATYLWS
GETAGQSAFAQVIADRQKILFDRSSAIKSTTMPEVKDYATVVEQNLQRFKPVFQLLEKQILSRVRNTASF
RKTAERLLRFSDKRQTEEAIDRIFAISQQQQQQQSKSKKNRRVGKRYKFVDAVPDIFAQIEVNEKKIRQK
AQILAQKELPIDEDEEMKDLLDFADVTYEKHKNGGALKGRFGQARMMTTTRSRAPSLSSSYTRLFLILNI
AIFFVMLAMQLTYFQRAQSLHGQRCLYAVLLIDSCILLWLYSSCSQSQC
>9544
MRTHTRGAPSVFFIYLLRFVSAYITDENPEVMIPFTNANYDSHPMLYFSRAEVAELQRRAASSHEHIAAR
LTEAVHTMLSSPLEYLPPWDPKDYSARWNEIYGNNLGALAMFCVLYPENIEARDMAKDYMERMAAQPSWL
VKDAPWDEVPLAHSLVGFATAYDFLYNYLSKTQQEKFLEVIANASGYMYETSYRRGWGFQYLHNHQPTNC
MALLTGSLVLMNQGYLQEAYLWTKQVLTIMEKSLILLREVTDGSLYEGVAYGSYTTRSLFQYMFLVQRHF
NINHFGHPWLKQHFAFMYRTILPGFQRTVAIADSNYNWFYGPESQLVFLDKFVMRNGSGNWLADQIRRNR
AVEGPGTPSKGQRWCTLHTEFLWYDASLKSVPPPDFGTPTLHYFEDWGVVTYGSALPAEINRSFLSFKSG
KLGGRAIYDIVHRNKYKDWIKGWRNFNAGHEHPDQNSFTFAPNGVPFITEALYGPKYTFFNNVLMFSPAV
SKSCFSPWEGQVTEDCSSKWSKYKHDLAASCQGRVVAAEEKNGVVFIRGEGVGAYNPQLNLKNVQRNLIL
LHPQLLLLVDQIHLGEESPLETAASFFHNVDVPFEETVVDGVHGAFIRQRDGLYKMYWMDDTGYSEKATF
ASVTYPRGYPYNGTNYVNVTMHLRSPITRAAYLFIGPSIDVQSFTIHGDSQQLDVFVATSKHAYATYLWT
GEATGQSAFAQVIADRHKILFDRNSAIKSSIVPEVKDYAAIVEQNLQHFKPVFQLLEKQILSRVRNTASF
RKTAERLLRFSDKRQTEEAIDRIFAISQQQQQQSKSKKNRRAGKRYKFVDAVPDIFAQIEVNEKKIRQKA
QILAQKELPIDEDEEMKDLLDFADVTYEKHKNGGLMKGRFGQARMMTTTHSRAPSLSASYTRLFLILNIA
IFFVMLAMQLTYFQRAQSLHGQRCLYAVLLIDSCILLWLYSSCSQSQC
>13616
MRTHTRGAPSVFFIHLCCFVAACITDENPEVMIPFINANYDSHPMLYFSKGEVEELQQRAGGTHRHIAAR
LTEAVQTMLSSPLEYLPPWDPKDYSARWNEIYGNNLGALAMFCVLYPENIEARNMATDYMERMAAQPSWL
VKDAPWDEVPLAHSLVGFATAYDFLFNYLSKTQQEKFLEVIANASGYMYETSYRRGWGFQYLHNHQPTNC
MALLTGSLVLMNQGYLQEAYLWTKQVLAIMEKSIVLLREVTDGSLYEGVAYGSYTTRSLFQYMFLVQRHF
DINHFNHPWLKQHFAFMYRTVLPGFQRTVAIADSNYNWFYGPESQLVFLDKFVMRNGSGNWLADQIRQNR
VIEGPGTASKGQRWCTLHTEFLWYEASLGSVPPPDYGTPTLHYFEDWGVVTYGSALPAETNRPFLSFKSG
KLGGRAIYDIVHRNKYKDWIKGWRNFNAGHEHPDQNSFTFAPNGVPFITEALYGPKYTFFNNVLMFSPAA
SKSCFSPWEGQVTEDCSSKWSKYKHDLAAHCQGRVVAALEKDGVVFIRGEGIGAYNPQLRLKNFQRNLIL
LHPQLLLLVDQIQLEEDSPLEAAASFFHNVDVPFEETVVDGVHGASIKQRGGTYKMYWMDDTGSSERGTL
ASVTYPRGYPYNGTNYVNVTTPLRSPVTRVAYLFIGPSVDVQSFNVHGDAQQLDVFVATSDHAYAVYLWT
GEAAGQTTFLRVIADRRKILFDRSATIYSTPVAEVKDYASIVEHNLEHFKPVFQRLEKQILSRVRNSAGF
RKTAERLLRFSDKRQTEEAINRIFAVSQRQRKQELQGKAKKNRRTGSRRYKFIDAVPDIFAQIEVNEKKI
RQKAQILAQKELPIDEEEEMKDLLDFADVSYVKHKIGVPFRGQLGQAQMATTARSRAPSISASYTRLFLV
LNIAIFFVMLAMQLTYFQRAQSLHGQRCLYAILLVDSCILLWLYSSCSQSQC
>10116
MRTHTRGAPTVFFICLLCCVSAYITDENPEVMIPFTNANYDSHPMLYFSRKDVAELQLRAASSHEHIAAR
LTEAVHTMLTNPLEYLPPWDHKEYSARWNEIYGNNLGALAMFCVLYPENIEAREMAKDYMERMAAQPSWL
VKDAPWDEVPLAHSLVGFATAYDFLYNYLSKTQQETFLEVIANASGYMYETSYRRGWGFQYLHNHQPTNC
MALLTGSLVLMNQGYLQEAYLWTKQVLSIMEKSLVLLREVTDGSLYEGVAYGSYTTRSLFQYMFLVQRHF
DINHFGHPWLKHHFAFMYRTVLPGFQRTVAIADSNYNWFYGPESQLVFLDKFVMRNGSGNWLADQIRKNR
VVEGPGTPSKGQRWCTLHTEFLWYDASLKSVPPLDFGTPTLHYFEDWGVVTYGSALPAEINRSFLSFKSG
KLGGRAIYDIVHRNKYKEWIKGWRNFNAGHEHPDQNSFTFAPNGVPFITEALYGPKYTFFNNVLMFSPAV
SKSCFSPWEGQVTEDCSSKWSKYKHDLAASCQGRVIAAEEKDGVVFIRGEGVGAYNPMLNLKNIHRNLIL
LHPQLLLLVDQIHLGEESPLETAASFFHNVDVPFEETVVDGVHGAFIRQRDGLYKMYWMDDTGYSEKATF
ASVTYPRGYPYNGTNYVNVTMHLRSPITRAAYLFIGPSVDVQSFSIHGDPQRLDVFVATSEHAYATYLWT
GENTGQSAFAQVIADHQKILFDQSSAIKSTTVPEVKDYAAIVERNLQHFKPVFQLLEKQILSRVQNTASF
RKTAERLLRFSDKRQTEEAIDRIFAISQQQRQQRGKSKKSRRTGKHYKFVDAVPDIFAQIEVNEKKIRQK
AQILAQKEQPIDEDEEMKDLLDFADVTYEKHRNGGSMKDGFGQARMVTSHNRAPSLSASYTRLFLILNIA
IFFVMLAMQLTYFQRAQSLHGQRCLYAVLLIDSCVLLWLYSSCSQSQC
>9913
MRTHTRGAPSVFFICLFCFVSACVTDENPEVMIPFTNANYDSHPMLYFSRAEVAELQLRAASSHEHIAAR
LTEAVNTMLSSPLEYLPPWDPKEYSARWNEIYGNNLGALAMFCVLYPENMEARDMAKDYMERMAAQPSWL
VKDAPWDEVPLAHSLVGFATAYDFLYNYLSKTQQEKFLEVIANASGYMYETSYRRGWGFQYLHNHQPTNC
MALLTGSLVLMNQGYLQEAYLWTKQVLTIMEKSLVLLREVTDGSLYEGVAYGSYTTRSLFQYMFLVQRHF
DINHFGHPWLKQHFAFMYRTILPGFQRTVAIADSNYNWFYGPESQLVFLDKFVMRNGSGNWLADQIRRNR
VVEGPGTPSKGQRWCTLHTEFLWYDASLKSVPPPDFGTPTLHYFEDWGVVTYGSALPAEINRSFLSFKSG
KLGGRAIYDIVHRNKYKDWIKGWRNFNAGHEHPDQNSFTFAPNGVPFITEALYGPKYTFFNNVLMFSPAA
SKSCFSPWEGQVTEDCSSKWSKYKHDPAASCQGRVVAAVEKNGVVFIRGEGVGAYNPQLHLRNVQRNLIL
LHPQLLLLVDQIHLGEDSPLERAASFFHNVDFPFEQTVVDGVHGALIRQRDGLYKMYWMDDTGYSEKGTF
ASVTYPRGYPYNGTNYVNVTTHLRSPVTRAAYLFIGPSIDVQSFSIHGDAQQLDVFVATSEHAYATYLWT
GETAGQSAFAQVIADRQKILFDRSSAIRSSVVPEVKDYAALVEQNLQHFKPVFQLLEKQILSRVRNTASF
RKTAERLLRFSDKRQTEEAIDRIFAISQQQQQQQSKSKKNRRGGKRYKFVDAVPDIFAQIEVNERKVRQK
AQILAQKELPVDEDEEMKDLLDFADITYEKHKNGDVMNGRFGQARMVTTTHSRAPALSASYTRLFLILNI
AIFFVMLAMQLTYFQRAQSLHGQRCLYAVLLIDSCILLWLYSSCSQSQC
>8364
MRTHTRGAPSVFFIHLLCYIVVYCTEKDINTQIPFLNAKYDGYPMLYFSKGEMETLRAQAASSHQHISAR
INEAVHVMLTNPSEYLPPWDPKEFSARWNEIYGNNLGALAMYCVLNPDNTEALGLAREYMERMAAQPSWL
VKDAPWDEVPLAHSLVGFATAYDFLYNSFSKQQKVRFLEVIANASVNMYETSFRRGWGFQYIHNHQPTNC
VALLTGSLVMMNQGYLQEAYFWTKQVLTIMEKSIVLLNDVTDGSLYEGVAYGSYTTRSLFQYMFLVQRHF
DINHFGHPWLKEHFAFMYRTVLPGFQRTVAIADSNYNWFYGPESQLVFLDKYVLRNGSGNWLAEQIHANR
VQEGPGTPAKGQRWCTLHTEFLWYDATLQSTPPPDFGTPQLHYFEDWGVVTYGSSLPAEINRPFLSFKSG
KLGGRAIFDIVHKNKYKDWIKGWRNFNAGHEHPDQNSFTFAPNGFPFITEALYGPKYTFLNNALMFSPSV
SESCFAPWQGQVTEDCTSKWLKYKQGEAADSQGRVVAAVEKSGVVFIRGEGVGAYSPNLKLKSVQRNLIL
LHPQLLLLVDHIHLDRGSTLEATSSFFHNVDMPFEATSIDSVHGAIIRHRDGMYKMYWMDDTGQSEKAVI
ASTSYPQGYPYNGTNYVNVTTYLRKPITRAIYVFIGPSVDVESFSVHGDYQQVDVYLATSEHAYAAYIFT
GETPSQSIYAKVVADRQKFVFDKTSSIGSSSPEEVKDYSAIVEQNLQHFKPVFQEMEKQILSHVKNTASF
RKTAERLLRFSDKRNTEEAIEKIFSVSQQQKQQGKTKKIRKATRNDKFINAVPDLFAQIEVNEKQTRQKA
MALAQSELPVNEEEEMKDLLDFVDKPQVKQKSVSVSKHVSPHMLTTFHSGTSISDSYTRLFLILNISIFM
VLLVLQLSRFLKPKGMQQKRCLYAILTLDFCILMWLYLSCYQSQC
>9796
MKTHTRGAPSVFFIYLFCFVSAYISDENPEVMIPFTNANYDSHPMLYFSRAEVAELQLRAASSHEHIAAR
LTEAVHTMLSSPLEYLPPWDPKEYSARWNEIYGNNLGALAMFCVLYPENIEARDMAKDYMERMAAQPSWL
VKDAPWDEVPLAHSLVGFATAYDFLYNYLSKTQQEKFLEVIANASGYMYETSYRRGWGFQYLHNHQPTNC
MALLTGSLVLMNQGYLQEAYLWTKQVLSIMEKSLVLLREVTDGSLYEGVAYGSYTTRSLFQYMFLVQRHF
DINHFGHPWLKQHFAFMYRTILPGFQRTVAIADSNYNWFYGPESQLVFLDKFVMRNGSGNWLADQIRRNR
VMEGPGTPSKGQRWCTLHTEFLWYDASLKSVPPPDYGTPTLHYFEDWGVVTYGSALPAEIDRSFLSFKSG
KLGGRAIYDIVHRNKYKDWIKGWRNFNAGHEHPDQNSFTFAPNGVPFITEALYGPKYTFFNNVLMFSPAV
SKSCFSPWEGQVTEDCSSKWSKYKHDLAASCQGRVVAAVEKNGVVFIRGEGVGAYNPQLNLKNVQRNLIL
LHPQLLLLVDQIHLGEESPLETAASFFHNVDFPFEETVVDGVHGAFIRQRDGLYKMYWMDDTGYSEKATF
ASVMYPRGYPYNGTNYVNVTMHLRSPITRAAYLFIGPSVDVQSFSIHGDSQQLDVFIATSEHAYATYLWT
GETTGQSAFAQVIADRQKILFDRSSAIKSTTVPEVKDYAAIVEQNLQHFKPVFQLLEKQILSRVRNTASF
RKTAERLLRFSDKRQTEEAIDRIFAISQQQQQKQSKSKKNRRGGKHYKFVDAVPDIFAQIEVNEKKIRQK
AQILAQKELPIDEDEEMKDLLDFADVTYEKHKNGGLMKGRVGQARMVTTTHSKAPSLSASYTRLFLILNI
AIFFVMLAMQLTYFQRAQSLHGQRCLYAVLLIDSCILLWLYSSCSQSQC
>59729
MRTHTRGAPSVFFIHAVCFAFACGAREDQDTMVPFVNANYDSYPMLYFSKGDVETLRLQASTTHQHIAAR
LIEAVQTMLSNPLEYLPPWDPKEFTARWNEIYGNNLGALAMFCVLFPENMEAINMAKDYMERMAAQPSWL
VKDAPWDEVPLAHSLVGFATAYDFLYSYLSKIQQERFLEVIANASGYMYETSYRRGWGFQYLHNHQPTNC
VALLAGSLVLMNQGYLQEAYLWTKQVLAIMEKSVVLLQEVTDGSLYEGVAYGSYTTRSLFQYMFLVQRHF
DINHFSHPWLKQHFAFMYRTVLPGFQRTVAIADSNYNWFYGPESQLVFLDKFVMRNGSGNWLAEQIRRNR
VVEGPGTPSKGQRWCTLHTEFLWYDASLRSVPPPDYGIPKLHYFEDWGVVTYGSALPAEINRPFLSFKSG
KLGGRAIYDIVHKNKYKEWIKGWRNFNAGHEHPDQNSFTFAPNGVPFITEALYGPKYTFLNNVLMFSPAV
SKSCFSPWEGQITEDCSSKWLKYKRDLAGDCQGRVVAATERSGVVFIRGEGVGAYNPKLKLRKLQRNLIL
LHPQLLLLVDQIHLEDDSPLEAATSFFHNVDVPFEETVVDDVHGAFIRHRDGIYKMYWMDDTGHSEKATI
ASRMYPRGYPYNGTNYVNVTTLLRHPITRAIYLFIGPSVDVQSFTVRGDSPQLDVFVTTGEHAYAVYLWP
VEDGSRSAFAQVIADRQKIVFDRASAIRSSTVPEVKDYVGIVERNLQHFKPVFQQLEKQILSRVRNTASF
RKTAERLLRFSDKRQTEEAIDRIFAISQRQQQQQHGRAKKNRKVAKGYKFVDAVPDIFAQIEVNERKVRQ
KAQTQAQKELPVDEDEEMKDLMDFADITYVKHKTGVSIKGRSGLAQMVATARSTPSISASYTRLFLILNI
AIFFVMLAMQLTYFQKAKRLHGQRCLYAILLVDSCILLWLYSSCSQSQC
>9483
MRTHTRGAPSVFFIYFLCFVSAYITDENPEVMIPFINANYDSHPMLYFSRAEVAELQLRAASSHEHIAAR
LTEAVHTMLSSPLEYLPPWDPKDYSARWNEIYGNNLGALAMFCVLYPENIEARDMAKDYMERMAAQPSWL
VKDAPWDEVPLAHSLVGFATAYDFLYNYLSKTQQEKFLEVIANASGYMYETSYRRGWGFQYLHNHQPTNC
MALLTGSLVLMNQGYLQEAYLWTKQVLTIMEKSLVLLREVMDGSLYEGVAYGTYTTRSLFQYMFLVQRHF
DINHFGHPWLKQHFAFMYRTILPGFQRTVAIADSNYNWFYGPESQLVFLDKFVMRNGSGNWLADQIRRNR
VVEGPGTPSKGQRWCTLHTEFLWYDASLKSVPPPDFGTPTLHYFEDWGVVTYGSALPAEINRSFLSFKSG
KLGGRAIYDIVHRNKYKDWIKGWRNFNAGHEHPDQNSFTFAPNGVPFITEALYGPKYTFFNNVLMFSPAV
SKSCFSPWEGQVTEDCSSKWSKYKHDLAASCQGRVVAAEEKNGVVFIRGEGVGAYNPHLNLKNVQRNLIL
LHPQLLLLVDQIHLGEESPLEIAASFFHNVDVPFEETMVDGVHGAFIRQRDGLYKMYWMDDTGYSEKATF
ASVTYPRGYPYNGTNYVNVTMHLRSPITRAAYLFIGPSIDVQSFTIHGDSQQLDVFVATSEHAYTTYLWT
DEATGQSAFAQVIADHHKILFDQNSAIKTSIVPEVKDYAAIVEQNLQHFKPVFQLLEKQILSRVRNTASF
RKTAERLLRFSDKRQTEEAIDRIFAISQKQQQQSKSKKNRRAGKRYKFVDAVPDIFAQIEVNEKKIRQKA
QILAEKELPIDEDEEMKDLLDFADVTYEKHKNGGLMKGRFGEARMVTTTHSRAPSLSASYTRLFLILNIA
IFFVMLAMQLTYFQRAQSLHGQRCLYAVLLIDSCILLWLYSSCSQSQC
>9103
MRTHTRGAPSVFFIHVMCFAFACGIREDVDAMVPFVNANYDSYPMLYFSKGDVEGLRLQAATTHRHITAR
LMEAVQTMLSNPLEYLPPWDPKEFSARWNEIYGNNLGALAMFCILYPDNTEAIGMAKDYMERMAAQPSWL
VKDAPWDEVPLAHSLVGFATAYDFLYSYLSKTQQERFLEVIANASGYMYETSYRRGWGFQYLHNHQPTNC
VALLAGSLVLMNQGYLQEAYLWTKQVLAIMEKSVVLLQEVTDGSLYEGVAYGSYTTRSLFQYMFLVQRHF
DINHFNHPWLKQHFAFMYRTVLPGFQRTVAIADSNYNWFYGPESQLVFLDKFVMRNGSGNWLADQIRRNR
VVEGPGTPSKGQRWCTLHTEFLWYDASLRSVPPPDFGVPKLHYFEDWGVVTYGSALPAEINRPFLSFKSG
KLGGRAIYDIVHKNKYKEWIKGWKNFNAGHEHPDQNSFTFAPNGVPFITEALYGPKYTFFNNVLMFSPAV
SKSCFSPWEGQITEDCSSKWLKYKHDLAGDCQGRVVAAMERSGVVFIRGEGVGAYNPKLKLRKLQRNLIL
LHPQLLLLVDQIHLEDDSPLEAATSFFHNVDVPFEETVVDEIHGAFIRHRDGIYKMYWMDDTGHSEKATI
ASRMYPRGYPYNGTNYVNVTTLLRHPITRAIYLFIGPSIDVQSFTVRADSRQLDVFVTTNEHSYAVYLWT
VEDGPRSAFAQVTAGRQKIVFDRTSAIRNFAVPEVKDYIGIVERNLQHFKPVFQQLEKQILSRVRNTASF
RKTAERLLRFSDKRQTEEAIDRIFAISQRQQQQRGRAKKNRKVPKGYKFVDAVPDIFAQIEVNERKVRQK
AQTQAQKELPIDEDEEMKDLLDFADITYVKHKTGVSIKGRSGLAQLVATTRSSAPSISASYTRLFLILNI
AIFFVMLAMQLTYFQKAKRLHGQRCLYAILLVDSCILLWLYSSCSQSQC
>61853
MRTHTRGAPSVFFIYLLCFVSAYITDENPEVMIPFTNANYDSHPMLYFSRAEVAELQRRAASSHEHIAAR
LTEAVHTMLSSPLEYLPPWDPKDYSARWNEIYGNNLGALAMFCVLYPENIEARDMAKDYMERMAAQPSWL
VKDAPWDEVPLAHSLVGFATAYDFLYNYLSKTQQEKFLEVIANASEYMYETSYRRGWGFQYLHNHQPTNC
MALLTGSLVLMNQGYLQEAYLWTKQVLTIMEKSLVLLREVTDGSLYEGVAYGSYTTRSLFQYMFLVQRHF
NINHFGHPWLKQHFAFMYRTILPGFQRTVAIADSNYNWFYGPESQLVFLDKFVMRNGSGNWLADQIRRNR
VVEGPGTPSKGQRWCTLHTEFLWYDASLKSVPPPDFGTPTLHYFEDWGVVTYGSSLPAEINRSFLSFKSG
KLGGRAIYDIVHRNKYKDWIKGWRNFNAGHEHPDQNSFTFAPNGVPFITEALYGPKYTFFNNVLMFSPAV
SKSCFSPWEGQVTEDCSSKWSKYKHDLAASCQGRVVAAEEKNGVVFIRGEGVGAYNPQLNLKNVQRNLIL
LHPQLLLLVDQIHLGEESPLETAASFFHNVDVPFEETVVDGVHGAFMRQRDGLYKMYWMDDTGYSEKATF
ASVTYPRGYPYNGTNYVNVTMHLRSPITRAAYLFIGPSIDVQSFTVHGDSQQLDVFVATSKHAYATYLWT
GEATGQSAFAQVIADHHKILFDQNSAIKSSIVPEVKDYAAIVEQNLQRFKPVFQLLEKQILSRVRNTASF
RKTAERLLRFSDKRQTEEAIDRIFAISQQQQQQSKSKKNRRAGKRYKFVDAVPDIFAQIEVNEKKIRQKA
QILAQKELPIDEDEEMKDLLDFADVTYEKHKNGGLIKGRFGQARMVTTTHSRAPSLSASYTRLFLILNIA
IFFVMLAMQLTYFQRAQSLHGQRCLYAVLLIDSCILLWLYSSCSQSQC
>9785
MRTHTRGAPSVFFIYLFCFASAYITDENPEVMIPFTNANYDNHPMLYFSRAEVAELQLRAASTHEHIAAR
LTEAVHTMLSSPLEYLPPWDPKDYSARWNEIYGNNLGALAMFCVLYPENIEARDMAKDYMERMAAQPSWL
VKDAPWDEVPLAHSLVGFATAYDFLYNYLSKTQQEKFLEVIANASGYMYETSYRRGWGFQYLHNHQPTNC
MALLTGSLVLMNQGYLQEAYLWTKQVLSIMEKSLVLLREVTDGSLYEGVAYGSYTTRSLFQYMFLVQRHF
DINHFGHPWLKQHFAFMYRTILPGFQRTVAIADSNYNWFYGPESQLVFLDKFVMRNGSGNWLADQIRRNR
VMEGPGTPSKGQRWCTLHTEFLWYDASLKSAPPPDFGTPTLHYFEDWGVVTYGSALPAEINRSFLSFKSG
KLGGRAIYDIVHRNKYKDWIKGWRNFNAGHEHPDQNSFTFAPNGVPFITEALYGPKYTFFNNVLMFSPAV
SKSCFSPWEGQVTEDCSSKWSKYKHDLAANCQGRVVAAVEKNGVVFIRGEGVGAYNPRLSLKNVQRNLIL
LHPQLLLLVDQIHLGEESPLETAASFFHNVDVPFEETVVDGVHGAFIRQRDGLYKMYWMDDTGYSEKATF
ASVTXPRGYPYNGTNYVNVTMHLRSPITRAAYLFIGPSVDVQSFSIHGDSQQLDVFIATNEHAYATYLWT
GEATGQSAFAQVIADRQKILFDRSSAIKSTTVPEVKDYAAIVEQNLQRFKPVFQLLEKEILSRVRNTASF
RKTAERLLRFSDKRQTEEAIDRIFAISQQQQQKSKKNRRAGKGYKFVDAVPDIFAQIEVNEKKIRRKAQI
LAQKEQPIDEDEEMKDLLDFADVTYEKHKNGDLVRGRFGQARMVTTTRSRAPSLSASYTRLFLILNIAIF
FVMLAMQLTYFQRSQSLHGQRCLYAVLLIDSCILLWLYSSCSQSQC
>9031
MRTHTRGAPSVFFIHVMCFAFACGTREDVDAMVPFVNANYDSYPMLYFSKGDVEGLRLQAATTHRHITAR
LMEAVQTMLSNPLEYLPPWDPKEFSARWNEIYGNNLGALAMFCVLYPDNTEAIGMAKDYMERMAAQPSWL
VKDAPWDEVPLAHSLVGFATAYDFLYSYLSKTQQERFLEVIANASGYMYETSYRRGWGFQYLHNHQPTNC
VALLAGSLVLMNQGYLQEAYLWTKQVLAIMEKSVVLLQEVTDGSLYEGVAYGSYTTRSLFQYMFLVQRHF
DINHFNHPWLKQHFAFMYRTVLPGFQRTVAIADSNYNWFYGPESQLVFLDKFVMRNGSGNWLADQIRRNR
VVEGPGTPSKGQRWCTLHTEFLWYDASLRSIPPPDFGVPKLHYFEDWGVVTYGSALPAEINRPFLSFKSG
KLGGRAIYDIVHKNKYKEWIKGWRNFNAGHEHPDQNSFTFAPNGIPFITEALYGPKYTFFNNVLMFSPAV
SKSCFSPWEGQITEDCSSKWLKYKHDLAGDCQGRVVAAMERSGVVFIRGEGVGAYNPKLKLRKLQRNLIL
LHPQLLLLVDQIHLEDDSPLEAATSFFHNVDVPFEETVVDEIHGAFIRHRDGIYKMYWMDDTGHSEKATI
ASRMYPRGYPYNGTNYVNVTTLLRHPITRAIYLFIGPSIDVQSFTVRADSRQLDVFVTTSEHSYVVYLWT
VEDGPRSAFAQVTAGRQKIVFDRTSAIRNFAVPEVKDYIGIVERNLQHFKPVFQQLEKQILSRVRNTASF
RKTAERLLRFSDKRQTEEAIDRIFAISQRQQQQRGRAKKNRKVSKGYKFVDAVPDIFAQIEVNERKVRQK
AQTQAQKELPIDEDEEMKDLLDFADITYVKHKTGVSIKGRSGLAQLVATTRSSAPSISASYTRLFLILNI
AIFFVMLAMQLTYFQKAKRLHGQRCLYAILLVDSCILLWLYSSCSQSQC
>9305
MRTHTRGAPSVFFIHLCYFVAAYITDENPEVMIPFINANYDSHPMLYFSKGEVEELQRRAASTHRHIAAR
LTEAVQMMLSSPLEYLPPWDPKDYSARWNEIYGNNLGALAMFCVLYPENIEARNMAKDYMERMAAQPSWL
VKDAPWDEVPLAHSLVGFATAYDFLYNYLSKTQQEKFLEVIANASGYMYETSYRRGWGFQYLHNHQPTNC
MALLTGSLVLMNQGYLQEAYLWTKQVLAIMEKSMVLLREVTDGSLYEGVAYGSYTTRSLFQYMFLVQRHF
DINHFNHPWLKQHFAFMYRTVLPGFQRTVAIADSNYNWFYGPESQLVFLDKFVMRNGSGNWLADQIRQNR
VIEGPGTASKGQRWCTLHTEFLWYEASLGSVPPPDYGTPTLHYFEDWGVVTYGSALPAEINRPFLSFKSG
KLGGRAIYDIVHRNKYKEWIKGWRNFNAGHEHPDQNSFTFAPNGVPFITEALYGPKYTFFNNVLMFAPAV
SKSCFSPWEGQVTEDCSSKWSKYKHDSAAHCQGRVVAALEKEGVVFIRGEGVGAYNPQLKLKNFQRNLIL
LHPQLLLLVDQIHLEEDSPLETAASFFHNVDVPFEEIVVDGVHGACIKQRDGIYKMYWMDDTGYSEKATI
ASVTYPRGYPYNGTNYVNVTTHLRSPITKVAYLFIGPSIDVQSFNLHGDAQQLDVFIATSDHAYAVYLWT
GEATGQTAFAHVIADHQKIIFDQSAIIKSSPVSEVKDYAGIVERSLQHFKPVFQQLEKQILSRVRNTASF
RKTAERLLRFSDKRQTEEAIDRIFAISQQQQQQQRKQQLQGKAKKNRRPARRYKFIDAVPDIFAQIEVNE
KKIRQKAQILAQKELPIDEDEEMKDLLDFADVSYVKHKIGVPFRGQFGQAQMVTTARSRAPSISASYTRL
FLILNIAIFFVMLAMQLTYFQRAQSLHGQRCVYAILLVDSCILLWLYSSCSQSQC
>30611
MRTHTRGAPSVFFIYLFCVVSAYITDKNPEVMIPFTNANYDSHPMLYFSRAEVAELQLRASSSHEHIAAK
LTEAVHTMLSSPLEYLPPWDPKDYSARWNEIYGNNLGALAMFCVLYPENIEARDMAKDYMERMAAQPSWL
VKDAPWDEVPLAHSLVGFATAYDFLYNYLSKTQQEKFLEVIANASGYMYETSYRRGWGFQYLHNHQPTNC
MALLTGSLVLMNQGYLQEAYLWTKQVLTIMEKSLVLLREVTDGSLYEGVAYGSYTTRSLFQYMFLVQRHF
DINHFGHPWLKQHFAFMYRTILPGFQRTVAIADSNYNWFYGPESQLVFLDKFVMRNGSGNWLADQVRKNR
VVEGPGTPSKGQRWCTLHTEFLWYDASLKSVPPPDFGTPTLHYFEDWGVVTYGSALPAEINRSFLSFKSG
KLGGRAIYDIVHRNKYKDWIRGWRNFNAGHEHPDQNSFTFAPNGVPFITEALYGPKYTFFNNVLMFSPAV
SKSCFSPWEGQVTEDCSSKWSKYKHDLAASCQGRVVAAVEKSGVVFIRGEGVGAYNPQLNLKNVQRNLIL
LHPQLLLLVDQIHLGEESPLETAASFFHNVDVPFEETVVDGVHGAFIRQRDGLYKMYWMDDTGYSEKATF
ASVTYPRGYPYNGTNYVNVTMHLRSPITRAAYLFIGPSVDVQSFSIHGDSQQLDVFVATSEHAYATYLWT
GEATGQSAFAQVIADRQKILFDRNSAIKSTTVPEVKDYAAIVEQNLQHFKPVFQLLEKQILSRVRNTASF
RKTAERLLRFSDKRQTEEAIDRIFAISQQQQQQQSKSKKNRRAGKRYKFVDAVPDIFAQIEVNEKKIRQK
AQILAQKELPIDEDEEMKDLLDFADITYEKHKNGGLMKGRFGQARMMTTTHSRAPSLSASYTRLFLILNI
AIFFVMLAMQLTYFQRAQSLHGQRCLYAVLLIDSCILLWLYSSCSQSQC
>31033
MRTHTRGAPTVFFISLLWPLLAAVDLDSSGGIPFMGGNYDGHPMLYFSRGDVEEMQYAAAGTHRDMAKRI
RDAGEAMLEHPEEYLPPWSPAEFTARWNEVYGNNLGVLSMFCLLYPHRAGALDLVKDYMERMAAQPSWLV
KDAPWDEVPLAHSLVGFATAYDFMHEYLNKDQQERFLQVIGNASRLMYEKSYVRGWGFQYLHNHQPTNCV
ALLTGSLVYMTQGYLQEAYLWTKQVLSIMEKSMVLLQDVTDGSLYEGVAYGTYTTRSLFQYMFLVQRHFA
IGHFRHPWLLKHFAFLYRTILPGFQRTVAIADSNYNWFYGPESQLVFLDRYVMRNGSGNWLADLIHQNRV
MEGPGQAGKGQRWCTLHTEFIWYDPGLIPKPPSDFGTSQLHYFEDWGVVTYGSALPADTNRTFLSFKSGK
LGGRAIYDIVHRNKYKEWVKGWRNFNAGHEHPDQNSFTFAPNGVPFVAEALYGPKYTLLNNVVLFGSSVS
DSCFKPWAGQVTETCDSKWLKYKVGQAADTQGRVEAAMRREGMVFIRGEGHSAYNPELKIRNFQRNLLLL
HPQLLLLVDHIHLQTDSPTRAMSAFFHNTDLPFQGTSVDGVHGAFITHGQDKYKMFWLDDTSYSNKGMLG
YWNYPRGYPYNGSNYVNVTMPLRYPHTRVAYIFFGPGVDVQSFSVRSDNQRVDIYLATKDHTYTIYLLTT
EEMSKPLYAMVLLDKKKVVFEKSVEAGADNSPDEVEEYVNVMEDNLQHVKPVFQQLERHILGRVLNTASI
RRTAERLLQFSDKRKTDEVIEKMFAMSKKQGKGKGGKRLNLGEKLSESFPDIFAQIEVNEKKERQRTSKH
TYTDTPEEGDQDLRAFMDYTDGHKNKKGAFVKGRKFKEIHMGVRTESESLSNTSSYIRLFLLLNTATFFL
LLAIILTRFQRGRSLHTQRCFYLILLIDCFILLYLYSSCSHTKC
>9733
MRTHTRGAPSVFFIYLFCFVSAYVTDENPEVMIPFTNANYDSHPMLYFSRAEVAKLQLRAASSHEHIAAR
LTEAVHIMLSSPLEYLPPWDPKEYSARWNEIYGNNLGALAMFCVLYPENIEARDMAKDYMERMAAQPSWL
VKDAPWDEVPLAHSLVGFATAYDFLYNYLSKTQQERFLEVIANASGYMYETSYRRGWGFQYLHNHQPTNC
MALLTGSLVLMNQGYLQEAYLWTKQVLTIMEKSLVLLREVTDGSLYEGVAYGSYTTRSLFQYMFLVQRHF
DINHFGHPWLKQHFAFMYRTILPGFQRTVAIADSNYNWFYGPESQLVFLDKFVMRNGSGNWLADQIRRNR
VMEGPGTPSKGQRWCTLHTEFLWYDASLKSVPPPDFGTPALHYFEDWGVVTYGSALPAEINRSFLSFKSG
KLGGRAIYDIVHRNKYKDWIKGWRNFNAGHEHPDQNSFTFAPNGVPFITEALYGPKYTFFNNVLMFSPAV
SKSCFSPWEGQVTEDCSSKWSKYKHDLAASCQGRVVAAMEKNGVVFIRGEGVGAYNPQLHLKNVQRNLIL
LHPQLLLLVDQIHLGEDSPLETAAGFFHNVDFSFEETVVDGVHGAFIRQRDGLYKMYWMDDTGYSEKGTF
ASVTYPRGYPYNGTNYVNVTTHLRSPITRAAYLFIGPSIDVQSFSIHGDSQQLDVFIATGEHAYATYLWT
GETTEQLALAQVIADRQKILFDWSSAIKSTIVPEVKDYAAIVEQNLQRFKPVFQLLEKQILSRVRNTASF
RKTAERLLRFSDKRQTEEAIDRIFAISQQQQQQQQSKSKKNRRGGKRYKFVDAVPDIFAQIEVNEKKIRQ
KAQILAQKELPIDEDEEMKDLLDFADVTYEKHKNGDLMKGRFGQARMVTTTRSRAPALSASYTRLFLILN
IAIFFVMLAMQLTYFQRAQSLHGQRCLYAVLLIDSCILLWLYSSCSQSQC
>127582
MRTHTRGAPSVFFIYLFCFASAYITDENPEVMIPFTNANYDNHPMLYFSRAEVAELQLRAANTHEHIAAR
LTEAVHTMLSSPLEYLPPWDPKDYSARWNEIYGNNLGALAMFCVLYPENIEARDMAKDYMERMAAQPSWL
VKDAPWDEVPLAHSLVGFATAYDFLYNYLSKTQQEKFLEVIANASGYMYETSYRRGWGFQYLHNHQPTNC
MALLTGSLVLMNQGYLQEAYLWTKQVLTIMEKSLILLREVTDGSLYEGVAYGSYTTRSLFQYMFLVQRHF
EINHFGHPWLKQHFAFMYRTILPGFQRTVAIADSNYNWFYGPESQLVFLDKFVMRNGSGNWLADQIRRNR
VMEGPGTPSKGQRWCTLHTEFLWYDASLKSIPPPDFGTPTLHYFEDWGVVTYGGALPAEINRSFLSFKSG
KLGGRAIYDIVHRNKYKDWIKGWRNFNAGHEHPDQNSFTFAPNGVPFITEALYGPKYTFFNNVLMFSPAV
SKSCFSPWEGQVTEDCSSKWSKYKHDLAANCQGRVVAAVEKNGVVFIRGEGVGAYSPRLRLKNVQRNLIL
LHPQLLLLVDQIYLGEESPLETAASFFHNVDVPFEETVVDGVHGAFIRQRDGLYKMYWMDDTGYSEKATF
ASVTYPRGYPYNGTNYVNVTTHLRSPITRAAYLFIGPSVDVQSFSIHGDSQQLDVFIATSKHAYATYLWT
GEATGQSAFAQVIADRQKILFDRSLAIKSTTVPEVKDYVAIVEQNLQRFKPVFQLLEKQILSRVRNTASF
RKTAERLLRFSDKRQTEEAIDRIFAISQQQQQQQSKSKKKRRAGKRYKFVDAVPDIFAQIEVSEKKIRRK
AQILAQKELPIDEDEEMKDLLDFADITYEKHKSGSLVRGQFGQARMVTTTHSRASSLSASYTRLFLILNI
AIFFVMLAVQLTYFQRAQSLHGQRCLYAVLLIDSCVLLWLYSSCSQSQC
>9708
MRTHTRGAPSVFFICLFCLASASIADENPEVMIPFTNANYDSHPMLYFSGAEVAELRLQAASSHEHIAAR
LTEAVHAMLSSPLEYLPPWDPKDYSARWNEIYGNNLGALAMFCVLYPENMEARDMAKDYMERMAAQPSWL
VKDAPWDEVPLAHSLVGFATAYDFLYNYLSKTQQEKFLEVIANVSGYMYETSYRRGWGFQYLHNHQPTNC
MALLTGSLVLMNQGYLQEAYLWTKQVLTIMEKSLVLLREVTDGSLYEGVAYGSYTTRSLFQYMFLVQRHF
DINHFGHPWLKQHFAFMYRTILPGFQRTVAIADSNYNWFYGPESQLVFLDKFVMRNGSGNWLADQIRRNR
VTEGPGTPSKGQRWCTLHTEFLWYDASLKSVPPPDFGTPTLHYFEDWGVVTYGSALPAEINRSFLSFKSG
KLGGRAIYDIVHRNKYKEWIKGWRNFNAGHEHPDQNSFTFAPNGVPFITEALYGPKYTFFNNVLMFSPAV
SKSCFSPWEGQVTEDCSSKWSKYKQDLAASCQGRVVAAEEKDGVVFIRGEGVGAYNPRLDLKNVQRNLIL
LHPQLLLLVDQIHLGEESPLESAASFFHNVDVPFEETVVDGVHGAFIRQRDGLYKMYWMDDTGYSEKATF
VSATYPRGYPYNGTNYVNVTVHLRSPITRTAYLFIGPSVDVQSFSIHGDSQQLGVFIATSQHAYAAYLWS
GENTAQPAFAQVIADRRRILFDRSSAIKSTSVPEVKDYAAVVDQNLQRFKPVFQQLEKQILSRVRNTASF
RKTAERLLRFSDKRQTEEAIDRIFAISQQQQQQSKSKRNRRVGKGYKFVDAVPDIFAQIEVNEKKIRQKA
QILAQKELPIDEDEEMKDLLDFADVTYEKHKNGGSLKGRFGQARMMTTTRSRAPSLSSSYTRLFLILNIA
IFFVMLAMQLTYFQRAQSLHGQRCLYAVLLIDSCILLWLYSSCSQSQC
>73337
MKTHTRGAPSVFFICLFCFASAYITDENPEVMIPFTNANYDSHPMLYFSRAEVAELQLRAASSHEHIAAR
LTEAVHTMLSSPLEYLPPWDAKDYSARWNEIYGNNLGALAMFCVLYPENIEARDMAKDYMERMAAQPSWL
VKDAPWDEVPLAHSLVGFATAYDFLYNYLSKTQQEKFLEVIANASGYMYETSYRRGWGFQYLHNHQPTNC
MALLTGSLVLMNQGYLQEAYLWTKQVLTIMEKSLVLLREVTDGSLYEGVAYGSYTTRSLFQYMFLMQRHF
NINHFGHPWLKQHFAFMYRTILPGFQRTVAIADSNYNWFYGPESQLVFLDKFVMRNGSGNWLADQIRRNR
VMEGPGTPSKGQRWCTLHTEFLWYDASLKSVPPADFGTPTLHYFEDWGVVTYGSALPAEIDRSFLSFKSG
KLGGRAIYDIVHRNKYKDWIKGWRNFNAGHEHPDQNSFTFAPNGVPFITEALYGPKYTFFNNVLMFSPAV
SKSCFSPWEGQVTEDCSSKWSKYKHDLAASCQGRVVAAGEKNGVVFIRGEGVGAYNPHLNLKNVQRNLIL
LHPQLLLLVDQIHLGEESPLETAASFFHNVDFPFEETVVDGVHGAFIRQRDGLYKMYWMDDTGYSEKATF
ASVTYPRGYPYNGTNYVNVTMHLRSPITRAAYLFIGPSVDVQSFSIHGDSQQLDVFIATSEHAYATYLWT
GETTGQSAFAQVIADRQKILFDRSSAIKSTTVPEVKDYAAIVEHNLQRFKPVFQLLEKQILSRVRNTASF
RKTAERLLRFSDKRQTEEAIDRIFAISQQQQQQQSKSKKNRRGGKRYKFVDAVPDIFAQIEVNEKKIRQK
AQILAQKELPIDEDEEMKDLLDFADVTYEKHKNGGLMKGQFGQARMVTTTHSRAPSLSASYTRLFLILNI
AIFFVMLAMQLTYFQRAQSLHGQRCLYAVLLIDSCILLWLYSSCSQSQC
>9361
MRTHTRGAPSVFFIYLFGFVSAYVTDENPEVMIPFTNANYDSHPMLYFSRAEVAELQVRAAGTHEHIAAR
LTEAVHTMLSSPLEYLPPWDPKEYSARWNEIYGNNLGALAMFCVLYPENIEARDMAKDYMERMAAQPSWL
VKDAPWDEVPLAHSLVGFATAYDFLYNYLSKMQQEKFLEVIANASGYMYETSYRRGWGFQYLHNHQPTNC
MALLTGSLVLMNQGYLQEAYLWTKQVLSIMEKSLVLLREVTDGSLYEGVAYGSYTTRSLFQYMFLVQRHF
GINHFGHPWLKQHFAFMYRTVLPGFQRTVAIADSNYNWFYGPESQLVFLDKFVMRNGSGNWLADRIRRNR
VTDGPGTPSKGQRWCTLHTEFLWYDASLKSVPPPDFGTPTLHYFEDWGVVTYGSALPAEINRSFLSFKSG
KLGGRAIYDIVHRSKYKDWIKGWRNFNAGHEHPDHNSFTFAPNGVPFITEALYGPKYTFFNNVLMFSPAV
SKSCFSPWEGQVTEDCSSKWSKYKHDLAASCQGRVVAALEKNGVVFIRGEGVGAYNPQLNLKSVQRNLIL
LHPQLLLLVDQIHVGEESPLETAASFFHNVDVPFEETVVDGVHGAFIRQRDGLYKMYWMDDTGYSEKATF
ASVTYPRGYPYNGTNYVNVTMHLRSPITRAAYLFIGPSVNVQSFSIHGDSQQLNVFIATSKHAYATYLWA
GETTGQSAFAQVIADRQKILFDWSSALRSTTVPEVKDYAAIVEQNLQRFKPVFQLLEKQILSRVRNTASF
RKTAERLLRFSDKRQTEEAIDRIFAISQQQQQQQSKSKKNRRAGKRYKFVDAVPDIFAQIEVNEKKIRQK
AQILAQKELPIDEDEEMKDLLDFADITYEKHKNGGLMKGQFGQAQMVVTTHSRAPSLSASYTRLFLILNI
AIFFVMLAMQLTYFQRAQSLHGQRCLYAVLLIDSCILLWLYSSCSQSQC
>106582
MRTYTRGAPTVFFISLLWPLLSLAAVAEVDPSGGIPFMGGNYNGHPMLYFSRGDVEQLQYAAAGTHQEMA
RRIREAGETMLEHPEEYLPPWSPAEFSARWNEVYGNNLGVLSMFCLLYPHRAGALDLVKDYMERMAAQPS
WLVKDAPWDEVPLAHSLVGFATAYDFLYEYLNKGQQERFLQVIGNASRLMYEKSYVRGWGFQYLHNHQPT
NCVALLTGSLVYMMQGYLQEAYLWTKQVLSIMEKSMVLLQDVTDGSLYEGVAYGTYTTRSLFQYMFLVQR
HFAIGHFDHSWLLKHFAFLYRTILPGFQRTVAIADSNYNWFYGPESQLVFLDRYVLRNGSGNWLADLIHQ
NRVMEGPGQAGKGQRWCTLHTEFIWYDPGLVPKPPSDFGTPKLHYFEDWGVVTYGSALPVKANSSFLSFK
SGKLGGRAIFDIVHKNKYKEWIKGWRNFNAGHEHPDQNSFTFAPNGVPFVTEALYGPKYTLLNNAVLFSS
AFSGSCFKPWAGQVTEACDSKWLKYKVGPAADAQGRVEAAIERKGMIFIRGEGRSAYNPELKIRNVQRNL
LLLHPQLLLVVDHIHLDPDSPVRAMSAFFHNTELPFQGTKVDGVHGAFISHGEDKYKMFWMDDTNYSNKG
VVGYWNYPRGYPYNGSNYVNVTMPLRYPHTRMAYIFFGPGVDVQSFSLRGDNERVDIYLATKKHIYTIYL
LTAEVTSKALFAMVLLDNKKIVFEKEAAEVSSFPEEVEEYVSLMEDNLQHVKPVFQQMERHILGRVLNTV
SFRKTAERLLQFTDKKKTEEAIEKMFAMSRKQSKGKGGKRVNLGDKLSETLPDIFAQIEVNEKKERQRTS
KRTYDDSPEEGDADTRAFVDYADSRKNRKGGFFKGRKFKEVHMVATAGSDSLPSTASYIRLFLLLNMATF
FSLLAVLLTRFKRGRSLYTQRCFYSILLIDCFILLYLYSSCSHTQC
>9978
MRTHTRGAPSVFFIYLLGFVSAFITDENPEVMIPFTNANYDSHPMLYFSRSEVVQLQLKAASTHEHIAAR
ITEAVHTMLSSPLEYLPPWDPKEYSARWNEIYGNNLGALAMYCVLYPENIEARDMAKDYMERMAAQPSWL
VKDAPWDEVPLAHSLVGFATAYDFLYSYLSKTQKEKFLEVIANASGYMYETSYRRGWGFQYLHNHQPTNC
MALLTGSLVLMNQGYLQEAYLWTKQVLTIMEKSLVLLREVTDGSLYEGVAYGSYTTRSLFQYMFLVQRHF
DINHFGHPWLKQHFAFMYRTILPGFQRTVAIADSNYNWFYGPESQLVFLDKFVMRNGSGNWLADQIRKNR
VVEGPGTPSKGQRWCTLHTEFLWYDANLKSVPPSDFGTPTLHYFEDWGVVTYGSALPAEINRSFLSFKSG
KLGGRAIYDIVHGNKYKDWIKGWRNFNAGHEHPDQNSFTFAPNGVPFITEALYGPKYTFFNNVLMFSPAV
SKSCFSPWEGQVTEDCSSKWSKYKHDLAASCQGRVVAAVEKNGVVFIRGEGVGAYNPQLNLKNIQRNLIL
LHPQLLLLVDEIHLGEDSALQTAASFFHNVDVPFEETEVDGVHGAFIRQRDGLYKMYWMDDTGYSEKATF
ASVTYPRGYPYNGTNYVNVTMHLRSPITRAAYLFIGPSVDVQSFSIHSSSRQLDVFIATSEHAYTTYLWM
GEPTGQSAFAQVIADHQKILFDHSSAIKSTSVPEVKDYTAIVEQNLQHFKPVFQLLEKQILSRVRNTASF
RKTAERLLRFSDKRQTEEAIDRIFAISQQQQQRQSKSRKNRRAGKRYKFVDAVPDIFAQIEVNEKKIRQK
AQILAQKELPIDEDEEMKDLLDFADVTYEKHKNGDLMKGGFAQARMGTTTHSRAPSLSASYTRLFLILNI
AIFFVMLAMQLTYFQRAQSLHGQRCLYAVLLLDSCILLWLYSSCSQSQC
>42254
MRTHTRGAPSVFFIYLFCFVSAYITDENPEVMIPFTNANYDSHPMLFFSRAEVSELQLRATSSHKHIAAR
LTEAVHAMLTSPLEYLPPWDPKDYSARWNEIYGNNLGALAMYCVLYPENIEAQDMAKDYMERMAAQPSWL
VKDAPWDEVPLAHSLVGFATAYDFLYNYLSKTQQEKFLEVIANASGYMYETSYRRGWGFQYLHNHQPTNC
MALLTGSLILMNQGYLQEAYLWTKQVLTIMEKSLVLLREVTDGSLYEGVAYGSYTTRSLFQYMFLVQRHF
DINHFGHPWLKQHFSFMYRTILPGFQRTVAIADSNYNWFYGPESQLVFLDKFVMRNGSGNWLADQIRRSR
VLEGPGTPSKGQRWCTLHTEFLWYDASLKSVPPPDFGTPTLHYFEDWGVVTYGSALPAEINRSFLSFKSG
KLGGRAIYDIVHRNKYKDWIKGWRNFNAGHEHPDQNSFTFAPNGVPFITEALYGPKYTFFNNVLMFSPAV
SKSCFSPWEGQVTEDCSSKWSKYKHDLAASCQGRVVAAVEKNGVVFIRGEGVGAYNPQLKLKHVQRNLIL
LHPQLLLLVDQIHLGEDTPLESVASFFHNVDVPFEETVVDGVHGAFIRQRDGLYKMYWMDDTGYSEKGNF
ASVTYPRGYPYNGTNYVNVTTHLRSPLTRAAYLFIGPSLDVQSFSIHGDSQQLDVFIATSEHAYATYIWT
GDTTGQSAFAQVIADRQKILFDQSSAIKSTLVPEVKDYTAIVEQNLQHFKPVFQLLEKQILSRVRNTASF
RKTAERLLRFSDKRQTEEAIDRIFAISQQQQQQQQIKSKKNRRVGKRYKFVDAVPDIFAQIEDNEKKIRQ
KAQILAQKEQPIDEDEEMKDLLDFADVTYEKHKNGLMKGHFGQGRMGTTRSKAPSLSASYTRLFLILNIA
IFFVMLAMQLTYFQRAQSLHGQRCLYAVLLIDSCILLWLYSSCSQSQC
>51337
MRTHTRGAPSVFFIYLLCFVSAHITDENPDVMIPFTNANYDSHPMLYFSRAEVVELQLRAASSHEHIAAR
LTEAVHTMLSSPLEYLPPWDPKEYSARWNEIYGNNLGALAMFCVLFPENIEARDMAKDYMERMAAQPSWL
VKDAPWDEVPLAHSLVGFATAYDFLYNYLSKTQQEKFLEVIANASGYMYETSYRRGWGFQYLHNHQPTNC
MALLTGSLVLMNQGYLQEAYLWTKQVLTIMEKSLVLLREVTDGSLYEGVAYGSYTTRSLFQYMFLVQRHF
GINHFNHPWLKQHFAFMYRTILPGFQRTVAIADSNYNWFYGPESQLVFLDKFVMRNGSGNWLADQIRRNR
VVEGPGTPSKGQRWCTLHTEFLWYDASLKSVPPPDFGTPTLHYFEDWGVVTYGSSLPAEINRSFLSFKSG
KLGGRAIYDIVHRNKYKDWIKGWRNFNAGHEHPDQNSFTFAPNGVPFITEALYGPKYTFFNNVLMFSPAV
SKSCFSPWEGQVTEDCSSKWSKYKHDLAASCQGRVVAAVEKDGVVFIRGEGMGAYNPQLNLKNFQRNLIL
LHPQLLLLVDQIHLGEESPLETAASFFHNVDVPFEETVVDGVHGAFIRQRDGLYKMYWMDDTGYSEKATF
ASVTYPRGYPYNGTNYVNVTMHLRSPITRAAYLFIGPSVDVQSFSIHGDSQRLDVFIATSEHAYATYLWT
GENAGQPAFAQVIADRQKILFDWNSAIKSTSVPEVKDYAAIVDQSLQHFKPVFQLLEKQILSRVRNTASF
RKTAERLLRFSDKRQTEEAIDRIFAISQQQQQQQQQSKSKRNRKAGKRYKFVDAVPDIFAQIEVNEKKVR
QKAQILAQRELPIDEDEEMKDLLDFADVTYEKHKNGDSVKDQLGHVRMTTHGRAPPLSASYTKLFLILNI
AIFFVMLAMQLTYFQRAQSLHGQRCLYAVLLIDSCVLLWLYSSCSQSQC
>9371
MRTHTRGAPSVFFICLVCFVSAHITDEDPEVMIPFMNANYDSHPMLYFSRAEVAELQLRAASTHEHIAVR
LTEAVNTMLSSPLEYLPPWDPKDYSARWNEIYGNNLGALAMFCVLYPENLEARDMAKDYMERMAAQPSWL
VKDAPWDEVPLAHSLVGFATAYDFLYNYLSKTQQEKFLEVIANASGYMYETSYRRGWGFQYLHNHQPTNC
MALLTGSLVLMNQGYLQEAYLWTKQVLTIMEKSLVLLREVTDGTLYEGVAYGSYTTRSLFQYMFLVQRHF
NINHFGHPWLKQHFAFMYRTILPGFQRTVAIADSNYNWFYGPESQLVFLDKFVIRNGSGNWLADRIRRNR
VMEGPGTPSKGQRWCTLHTEFLWYDASLKSVPPPDFGTPALHYFEDWGVVTYGSALPAEINRSFLSFKSG
KLGGRAIYDIVHRSKYKDWIKGWRNFNAGHEHPDQNSFTFAPNGVPFITEALYGPKYTYFNNALMFSPAV
SKSCFAPWEGQVTEDCSSKWSKYKHDLAANCQGRVVAAMEKNGLVFIRGEGVGAYNPRLNLKNVQRNLIL
LHPQLLLLVDQISLGEASPVETAASFFHNVDAPFEETEVDGVHGAFIRQRDGLYKMYWMDDTGYSEKATF
ASVTYPRGYPYNGTNYVNVTMHLRSPITRVAYLFIGPSVDVQSFSIHGDAQQLDVFIATSEHAYATYLWT
GEATGQSAFAQVIADHQKILFDRSAAIRSTLVPEVRDYAAIVEQNLQRFKPVFQLLEKQILSRVRNTASF
RKTAERLLRFSDKRQTEEAIDRIFAISQQQLLQQSKSKKTRRAGKRYKFVDAVPDIFAQIEVNEKRIRQK
AQILAQKELPVDEDEEMKDLLDFADVTYEKHKNGGLVKGQFGQARMLTTTLRRAPSLSASYTRLFLILNI
AIFFVMLAVQLTYFQRAQSLHGQRCLYTVLLIDSCILLWLYSSCSQSQC
>143302
MRTHTRGAPSVFFIYLFCFASAYITDENPEVMIPFTNANYDSHPMLYFSRAEVAELQLRAASSHEHIAAR
ITEAVHTMLSSPLEYLPPWDPKDYSARWNEIYGNNLGALAMFCVLYPENIEARDMAKDYMERMAAQPSWL
VKDAPWDEVPLAHSLVGFATAYDFLYNYLSKTQQEKFLEVIANASGYMYETSYRRGWGFQYLHNHQPTNC
MALLTGSLVLMNQGYLQEAYLWTKQVLTIMEKSLVLLREVTDGSLYEGVAYGSYTTRSLFQYMFLVQRHF
DINHFGHPWLKQHFAFMYRTVLPGFQRTVAIADSNYNWFYGPESQLVFLDKFVMRNGSGNWLADQIRRNR
VMEGPGTPSKGQRWSTLHTEFLWYDASLKSVPPPDFGTPTLHYFEDWGVVTYGSALPAEINRSFLSFKSG
KLGGRAIYDIVHRNKYKDWIKGWRNFNAGHEHPDQNSFTFAPNGVPFITEALYGPKYTFFNNVLMFSPAV
SKSCFSPWEGQVTEDCSSKWSKYKHDLAANCQGRVVAAVEKNGVVFIRGEGVGAYNPELKLKNVQRNLIL
LHPQLLLLVDQLHLGEDSPLETAASFFHNVDVPFEETVVDGVHGAFIRQRDGLYKMYWMDDTGYSEKATF
ASVTYPRGYPYNGTNYVNVTMHLRSPITRAAYLFIGPSVDVQSFSIHGDSQQLDVFIATSEHAYATYLWT
SETTGQSAFAQVIADRQKILFDRSSGIRSTIVTEVKDYAAIVEQNLQHFKPVFQLLEKQILSRVRNTASF
RKTAERLLRFSDKRQTEEAIDRIFAISQQQQQQQQQSKSKKNRRAGKRYKFVDAVPDIFAQIEVNEKKIR
QKAQILAQKEQPIDEDEEMKDLLDFADVTYEKHKNGLMKSRFRQGRMGTTTHSQAPSLSASYTRLFLILN
IAIFFVMLAVHLTYFHRAQSLHGQRCLYAVLLIDSFILLWLYSSCSQSQC
>9669
MRTHTRGAPSVFFIYLFCFVSAYITDENPEVMIPFTNANYDSHPMLYFSRAEVAELQLRAASSHEHIAAR
LTEAVHTMLSSPLEYLPPWDPKDYSARWNEIYGNNLGALAMFCVLYPENIEARDMAKDYMERMAAQPSWL
VKDAPWDEVPLAHSLVGFATAYDFLYNYLSKSQQEKFLEVIANVSGYMYETSYRRGWGFQYLHNHQPTNC
MALLTGSLVLMNQGYLQEAYLWTKQVLTIMEKSLVLLREVTDGSLYEGVAYGSYTTRSLFQYMFLVQRHF
DINHFGHPWLKQHFAFMYRTILPGFQRTVAIADSNYNWFYGPESQLVFLDKFVMRNGSGNWLADQIRRNR
VTEGPGTPSKGQRWCTLHTEFLWYDASLKSVPPPDFGTPTLHYFEDWGVVTYGSALPAEINRSFLSFKSG
KLGGRAIYDIVHRNKYKDWIKGWRNFNAGHEHPDQNSFTFAPNGVPFITEALYGPKYTFFNNVLMFSPAA
AKSCFSPWEGQVTEDCSSKWSKYKHDPAASCQGRVVAAVEKSGVVFIRGEGVGAYSPQLDLKSVQRNLIL
LHPQLLLLVDQIHLGERSPLETAASFFHNVDVPFEETAVDGVHGAFLRQRDGLYKMYWMDDTGSSEKATF
ASVTYPRGYPYNGTNYVNVTVRLRRPVTRTAYLFIGPSLDVQSFSLHGDAQQLDVFVATRRHAYAAYLWT
GESTGQSAFAQVIADRREILFDRSCAVRSAPPPELRDHAALVERSLQRFKPVFQLLEKQILSRVRNTAGF
RKTAERLLRFSDKRQTEEAIDRIFAISQQQQQPQQQQQSKSKKNRRGGKRYQFVDAVPDIFAQIEVNEKK
IRQKAQILAQKELPIDEDEEMKDLLDFADVTYEKHKSGGSLNGRFGQARMMTTTRSRAPSLSSSYTRLFL
ILNIAIFFVMLAMQLTYFQRAQSLHGQRCLYAVLLIDSCILLWLYSSCSQSQC
>10181
MRTHTRGAPSVFFICLLCLGSAYIADESPEVMIPFTNANYDSHPMLYFSRSEVAELQLQAVSSHEHIAAR
LTDAVHTMLSSPLEYLPPWDPKDYSARWNEIYGNNLGALAMFCVLYPENIEARDMAKDYMERMAAQPSWL
VKDAPWDEVPLAHSLVGFATAYDFLYNYLSKMQQERFLEVIANASGYMYETSYRRGWGFQYLHNHQPTNC
MALLTGSLVLMNQGYLQEAYLWTKQVLTIMEKSLVLLREVTDGSLYEGVAYGSYTTRSLFQYLFLVQRHF
GINHFGHPWLKRHFAFMYRTILPGFQRTVAIADSNYNWFYGPESQLVFLDKFVMRNGSGNWLADQIRRNR
VVEGPGTPSKGQRWCTLHTEFLWYDASLKLVPPPDFGTPALHYFEDWGVVTYGSALPAEINRSFLSFKSG
KLGGRAIYDIVHRNKYKDWIKGWRNFNAGHEHPDQNSFTFAPNGVPFITEALYGPKYTFFNNVLMFSPAV
AKTCFSPWEGQVTEDCSSKWSKYKHDLAASCQGRVVAAAEKGGVVFIRGEAVHAYNPQLKLKNIQRNLIL
LHPQLLLLVDQIHLGEESPLETAASFFHNVDVPFEETVVDGVHGAFLRQRDGLYKMYWMDDTGYSEKATF
ASVTYPRGYPYNGTNYVNVTMHLRQPITRAAYLFIGPSVDVQSFSIHGDWQQLDVFIATSEHAYATYLWT
GETTGQSAFAHVIADRQKILFDQSSAIKSSSVPEVKDYTAIVEQNLQHFKPVFQLLEKQILSRVRNTASF
RETAERLLRFSDKRQTEEAIDRIFAISQQQQQQQQQSKSKKNRRAGKHYKFVDAVPDIFAQIEVNEKKIR
QKAQILAQKELPIDEDEEMKDLLDFADVTYEKHKKNGGSMKGRFGQVRMVTTTHSRAPILSASYTRLFLI
LNIAIFFVMLAMQLTYFQRAQSLHSQRCLYAVLLIDGCILLWLYSSCSQSQC
>10036
MKTHTRGAPSVFFIYLLGFVSAYITDENPEVMIPFTNANYDSHPMLYFSRTEVPELQLKAASSHEHIAAR
LTEAVHAMLSNPLEYLPPWDHKDYSARWNEIYGNNLGALAMFCVLYPENLEARDMAKDYMERMAAQPSWL
VKDAPWDEVPLAHSLVGFATAYDFLYNYLSKTQQETFLEVIANASSYMYETSYRRGWGFQYLHNHQPTNC
MALLTGSLVLMNQGYLQEAYLWTKQVLTIMEKSLVLLREVTDGSLYEGVAYGSYTTRSLFQYMFLVQRHF
DINHFGHPWLKQHFAFMYRTILPGFQRTVAIADSNYNWFYGPESQLVFLDKFVMRNGSGNWLADQIRKNR
VLEGPGTPSKGQRWCTLHTEFLWYDASLKSVPPPDYGTPTLHYFEDWGVVTYGSALPAEINRSFLSFKSG
KLGGRAIYDIVHRNKYKDWIKGWRNFNAGHEHPDQNSFTFAPNGVPFITEALYGPKYTFFNNVLMFSPAV
SKSCFSPWEGQVTEDCSSKWSKYKHDLAASCQGRVVAAEEKEGIVFIRGEGVGAYNPLLNLKNIQRNLVL
LHPQLLLLVDQIHLGEESPLETAASFFHNVDVPFEETVVDGVHGAFIRQRDGLYKMYWMDDTGYSEKATF
ASVTYPRGYPYNGTNYVNVTMHLRSPITRAAYLFIGPSVDVQSFSIHGDPQRLDVFVATSEHAYATYLWT
DESTGQSAFAQVIADHQKILFDRSSAIKITAVPEVKDYAAIVEHNLQLFKPVFQLLEKQILSRVQNTASF
RKTAERLLRFSDKRQTEEAINRIFAISQRQRQHQGKSKKSRRTGKRYKFVDAVPDIFAQIEVNEKKVRQK
AQILAQKELPIDEDEEMKDLLDFADVTYEKHKNGGGSVKGGFGQVRMVTTSLNRAPSLSASYTRLFLILN
IAIFLVMLAMQLTYFQRAQSLHSQRCLYAVLLIDSCILLWLYSSCSQSQC
>59894
MRTHTRGAPSVFFIHAVCFAFACSAREDQDTMVPFVNANYDSYPMLYFSKGDVETLRLQASTTHQHIAAR
LIEAVQTMLSNPLEYLPPWDPKEFSARWNEIYGNNLGALAMFCVLFPENMEAINMAKDYMERMAAQPSWL
VKDAPWDEVPLAHSLVGFATAYDFLYSYLSKIQQERFLEVIANASGYMYETSYRRGWGFQYLHNHQPTNC
VALLAGSLVLMNQGYLQEAYLWTKQVLAIMEKSVVLLQEVTDGSLYEGVAYGSYTTRSLFQYMFLVQRHF
DINHFSHPWLKQHFAFMYRTVLPGFQRTVAIADSNYNWFYGPESQLVFLDKFVMRNGSGNWLAEQIRRNR
VVEGPGTPSKGQRWCTLHTEFLWYDASLSSVPPPDYGVPKLHYFEDWGVVTYGSALPAEINRPFLSFKSG
KLGGRAIYDIVHKNKYKEWIKGWRNFNAGHEHPDQNSFTFAPNGVPFITEALYGPKYTFLNNVLMFSPAV
SKSCFSPWEGQITEDCSSKWLKYKHDLAGDCQGRVVAAMERSGVVFIRGEGVGAYNPKLKLRKLQRNLIL
LHPQLLLLVDQIHLEDDSPLEAATSFFHNVDVPFEETVVDDVHGAFIRHRDGIYKMYWMDDTGHSEKATV
ASRMYPRGYPYNGTNYVNVTTLLRRPVTRAIYLFIGPSVDVQSFTVRGDSPQLDVFVTTGEHAYAVYLWP
VEDGSRSAFAQVIADRQKIVFDRASAIRSSTVPEVKDYIGIVERNMQHIKPVFQQLEKQILSRVRNTASF
RKTAERLLRFSDKRQTEEAIDRIFAISQRQQQQQRGRTKKNRKVAKGYKFVDAVPDIFAQIEVNERKVRQ
KAQTQAQKELPVDEDEEMKDLLDFADITYVKHKTGVSIKGQSGLAQMVTTTRSAPSISASYTRLFLLLNI
AIFFVMLAMQLTYFPKAKRLHSQRCLYAILLVDSCILLWLYSACSQSQC
>13146
MRTHTRGAPSVFFIHAVCFAFAYSAREDPDAMVPFVNANYDSYPMLYFSKGDMETLRLQATTTHRHIAAR
LIEAVQTMLSNPLEYLPPWDPKEFSARWNEIYGNNLGALAMFCILYPENIEAINMAKDYMERMAAQPSWL
VKDAPWDEVPLAHSLVGFATAYDFLYSYLSKTQQERFLEVIANASGYMYETSYRRGWGFQYLHNHQPTNC
VALLAGSLVLMNQGYLQEAYLWTKQVLAIMEKSVVLLQEVTDGSLYEGVAYGSYTTRSLFQYMFLVQRHF
DINHFSHPWLKQHFAFMYRTVLPGFQRTVAIADSNYNWFYGPESQLVFLDKFVMRNGSGNWLAEQIRRNR
VVEGPGTASKGQRWCTLHTEFLWYDASLRSIPPLDYGVPKLHYFEDWGVVTYGSALPAEINRPFLSFKSG
KLGGRAIYDIVHKNKYKEWIRGWRNFNAGHEHPDQNSFTFAPNGVPFITEALYGPKYTFFNNVLMFSPAV
SKSCFSPWEGQITEDCSSKWLKYKHDLAGDCQGRVIAAMERSGVVFIRGEGVGAYNPKLKLRKLQRNLIL
LHPQLLLLVDQIHLEDDSPLEAATSFFHNVDVPFEETVVDDVHGAFIRQRDGIYKMYWMDDTGHSEKATI
ASRMYPRGYPYNGTNYVNVTTLLRHPITRAIYLFIGPSVDVQSFTVRGDSPQLDVFVTTSEHAYTVYLWP
VEDGSRSAFAQVIADRQKILFDRASAIRSSAVPEVKDYIGIVERNLQHFKPVFQQLEKQILSRVRNTASF
RKTAERLLRFSDKRQTEEAIDRIFAISQRQQQQHGRAKKNRKVAKGYKFVDAVPDIFAQIEVNERKVRQK
AQTQAQKELPIDEDEEMKDLLDFADITYVKHKTGMSIKGRSGLGQMVTTARISAPSISASYTRLFLILNI
AIFFVMLAMQLTYFQKAKRLHGQRCLYAILLVDSCILLWLYSSCSQSQC
>419612
MFLRNTAGLWTSEWHFSISALPPRSWLVKDAPWDEVPLAHSLVGFATAYDFLYNYLSKTQQEKFLEVIAN
ASGYMYETSYRRGWGFQYLHNHQPTNCMALLTGSLVLMNQGYLQEAYLWTKQVLTIMEKSLVLLREVTDG
SLYEGVAYGSYTTRSLFQYMFLVQRHFDINHFGHPWLKQHFAFMYRTILPGFQRTVAIADSNYNWFYGPE
SQLVFLDKFVMRNGSGNWLADQIRKNRVLEGPGTPSKGQRWCTLHTEFLWYDASLKSVPPPDFGTPTLHY
FEDWGVVTYGSALPAEINRSFLSFKSGKLGGRAIYDIVHRNKYKDWIKGWRNFNAGHEHPDQNSFTFAPN
GVPFITEALYGPKYTFFNNVLMFSPAVSKSCFSPWEGQVTEDCSSKWSKYKHDLAASCQGRVVAAVEKNG
VVFIRGEGVGAYNPQLNLKNVERNLILLHPQLLLLVDQIHLGEDSPLETAASFFHNVDFPFEETVIDGVH
GAFIRQRDGLYKMYWMDDTGYSEKGTFASVTYPRGYPYNGTNYVNVTMHLRSPITRAAYLFIGPSVDVQS
FSIHGDAQQLDVFIATSEHAYTTYLWTGETTGQSAFAQVIADHHKILFDRSSAIKSPIIPEEKDYAALVD
QNLQRFKPVFQLLEKQILSRVRNTASFRKTAERLLRFSDKRQTEEAIDRIFAISQQQQQQSKSKKNRRVG
KRYKFVDTVPDIFAQIEVNEKKIRQKAQILAQKELPIDEDEEMKDLLDFADVTYEKHKNGDLMEGRFGQA
RMVTTTRSRAPALSASYTRLFLILNIAIFFVMLAMQLTYFQRAQSLHGQRCLYAVLLIDSCILLWLYSSC
SQSQC
>8954
MRTHTRGAPSVFFIHAVCFAFACGAREDLDVMVPFVNANYDSYPMLYFSKGDMEALRLQAATTHQHIAAR
LTEAVQTMLSNPLEYLPPWDPKEFSARWNEIYGNNLGALAMFCVLFPENIEAINMAKDYMERMAAQPSWL
VKDAPWDEVPLAHSLVGFATAYDFLYSYLSKTQQERFLEVIANASGYMYETSYRRGWGFQYLHNHQPTNC
VALLAGSLVLMNQGYLQEAYLWTKQVLAIMEKSVVLLQEVTDGSLYEGVAYGSYTTRSLFQYVFLVQRHF
DINHFSHPWLKQHFAFMYRTVLPGFQRTVAIADSNYNWFYGPESQLVFLDKFVMRNGSGNWLAEQIRRNR
VVEGPGTPSKGQRWCTLHTEFLWYDASLRSVPPPDYGIPKLHYFEDWGVVTYGSALPAEINRPFLSFKSG
KLGGRAIYDIVHKNKYKEWIKGWRNFNAGHEHPDQNSFTFAPNGVPFITEALYGPKYTFFNNVLMFSPAV
AKSCFSPWEGQVTEDCSSKWLKYKHDLAGDCQGRVVAAMERSGVVFIRGEGVGAYNPKLKLRKLQRNLIL
LHPQLLLLVDQIHLEDDSPLEAATSFFHNVDVPFEETVVDDVHGAFIRHRDGIYKMYWMDDTGHSEKATI
ASRMYPRGYPYNGTNYVNVTTLLRHPITRAIYLFIGPSVDVQSFTVRGDSPQLDVFVTTSEHAYTVYLWP
IEDGSRSAFAQVIADRQKIVFDRASAIRSSTVPEVKDYVGIVERNLQHFKPVFQHLEKQILSRVRNTASF
RKTAERLLRFSDKRQTEEAIDRIFAISQRQQQQQHGRAKKNRKVAKGYKFVDAVPDIFAQIEVNERKVRQ
KAQTQAQKELPVDEDEEMKDLLDFADITYVKHKTGVSVKGRSGLAQMVTTARSSAPSISASYTRLFLILN
IAIFFVMLAMQLTYFQKAKRLHGQRCLYAILLVDSCILLWLYSSCSQSQC
>8478
MRTHTRGAPSVFFIHVVCFALASGTDEKPSAVIPFVNANYDSYPMLYFSKGEVEDLRIKAATTHQHIAAR
LTEAVQTMLSSPLEYLPPWDPKEFSARWNEIYGNNLGALAMFCVLYPKNIEAINMAKDYMERMAAQPSWL
VKDAPWDEVPLAHSLVAFATAYDFLYNYLSKTEQERFLEVIANASGYMYETSYRRGWGFQYLHNHQPTNC
MALLAGSLVLMNQGYLQEAYLWTKQVLSIMEKSIVLLREVTDGSLYEGVAYGSYTTRSLFQYMFLVQRHF
DINHFNHPWLKEHFAFMYRTVLPGFQRTVAIADSNYNWFYGPESQLVFLDKFVMRNGSGNWLADQIRRNR
VVEGPGTPSKGQRWCTLHTEFLWYDASLHSVPPPDYGIPKLHYFEDWGVVTYGSALPAEINRPFLSFKSG
KLGGRAIYDIVHKNKYKEWIKGWRNFNAGHEHPDQNSFTFAPNGVPFITEALYGPKYTFFNNVLMFSPAV
SKSCFSPWEGQVTEDCSSKWLKYKHDLAADCQGRVVAAMERKGVVFIRGEGVGAYNPKLKLKNFQRNLLL
LHPQLLLLVDLIHLEDDSPLEAATSFFHNVDVPFEETVIDDVHGAFIRHHDGLYKMYWMDDTGYSEKAIV
ASKMYPRGYPYNGTNYVNVTTHLRNPITRAVYLFIGPSIDVQSFNVHGDSQQLDVFIATSEHAYAVYLWT
GEDGGHSVFAQIIADRQKILFDRTSTIRNSAVSEVKDYVQIVEQNLQHFKPVFQQLEKQILSRVQNTDSF
RKTAERLLRFSDKRQTEEAIDRLFAISQQQQQQQGRAKKSKKVAKGYKFVDAVPDIFAQIEVNERKVRQK
AQTLAQKELPVDEDEEMKDLLDFADVTYVKHKNGASIKGQSGLEQMVSTARSSAPSISASYTRLFLILNI
VIFFVMLAMQLTYFQKAKSLHGQRWLYAILLADSCILLWLYSSCSQSQC
>79684
MRTHTRGAPSVFFIYLLCFVSAYITDENPEVMIPFTNANYDSHPMLYFSRREVAELQLRAASSHEHIAAR
LTEAVHTMLSNPLEYLPPWDHKEYSARWNEIYGNNLGALAMFCVLYPENIEARDMAKDYMERMAAQPSWL
VKDAPWDEVPLAHSLVGFATAYDFLYNYLSKTQQETFLEVIANASSYMYETSYRRGWGFQYLHNHQPTNC
MALLTGSLVLMNQGYLQEAYLWTKQVLTIMEKSLVLLREVTDGSLYEGVAYGSYTTRSLFQYMFLVQRHF
DINHFGHPWLKQHFAFMYRTILPGFQRTVAIADSNYNWFYGPESQLVFLDKFVMRNGSGNWLADQIRKNR
VVEGPGTPSKGQRWCTLHTEFLWYDASLKSVPPPDFGTPTLHYFEDWGVVTYGSALPAEINRSFLSFKSG
KLGGRAIYDIVHRNKYKDWIKGWRNFNAGHEHPDQNSFTFAPNGVPFITEALYGPKYTFFNNVLMFSPAV
SKSCFSPWEGQVTEDCSSKWSKYKHDLAASCQGRVIAAAEKDGVVFIRGEGIGAYNPLLHLKNIQRNLIL
LHPQLLLLVDQIHLGEESPLETAASFFHNVDVPFEETVVDGVHGAFIRQRDGLYKMYWMDDTGYSEKATF
ASVTYPRGYPYNGTNYVNVTMHLRSPITRAAYLFIGPSVDVQSFSIHGDPQRLDVFVTTNEHAYATYLWT
GESPGQSAFAQVIADHQKILFDWSSAIKSPTVPEVKDYAAIVEHNLQHFKPVFRLLEKQILSRVQNTASF
RKTAERLLRFSDKRQTEEAIDRIFAISQRQQQQQGKSKKSRRAGKRYKFVDAVPDIFAQIEVNEKKVRQR
AQILAQKELPIDEDEEMKDLLDFADVTYEKQKNGGSMKGGFGQMRMVTSSRNRAPSLSASYTRLFLILNI
AIFFVMLAMQLTYFQRAQSLHGQRCLYAVLLIDSCVLLWLYSSCSQTQC
>43179
MRTHTRGAPSVFFIYLLCLVSAYITDENPEVMIPFTNANYDSHPMLYFSRAEVAELQLRAASSHEHIAAR
LREAVHTMLSSPLEYLPPWDPKDYSARWNEIYGNNLGALAMFCVLYPENIEARDMAKDYMERMAAQPSWL
VKDAPWDEVPLAHSLVGFATAYDFLYNYLSKTQQEKFLEVIANASGYMYETSYRRGWGFQYLHNHQPTNC
MALLTGSLVLMNQGYLQEAYLWTKQVLTIMEKSLVLLREVTDGSLYEGVAYGSYTTRSLFQYMFLVQRHF
DINHFGHPWLKQHFAFMYRTILPGFQRTVAIADSNYNWFYGPESQLVFLDKFVMRNGSGNWLADQIRRNR
VVEGPGTPSKGQQDCSSKWSKYKHDLAANCQGRVVAAMEKDGVVFIRGEGVGAYNPRLNLKNIQRNLILL
HPQLLLLVDQIHLGEESPLETAASFFHNVDFPFEETVVDGVHGAFIRQRDGLYKMYWMDDTGYSEKATIA
SVTYPRGYPYNGTNYVNVTMHLRSPITRAAYLFIGPSVDVQSFSIHGDSQRLDVFIATSEHAYAIYLWTS
ETTGQSAFAQVIADRQEILFDWNSAIKSTTVPEVKDYTAIVEHNLQHFKPVFQLLEKQILSRVQNTASFR
KTAERLLRFSDKRQTEEAIDRIFAISQQQQQQQGKSKKSRRSGKRYKFVDAVPDIFAQIEVNEKKIRQKA
QILAQKELPIDEDEEMKDLLDFADVTYEKHKNGALMKGRFGQARMVTTSHSRAPSLSASYTRLFLILNIA
IFFVMLAMQLTYFQRSQSLYGQRCLYAVLLIDSCILLWLYSSCSQSQC
>34839
MRTHTRGAPSVFFICLLCLGSAHTTDENPEVLIPFTNANYDSHPMLYFSRSQVAELQLWAVSSHEHIAAR
LTEAVHTMLSSPLEYLPPWDPKDYSARWNEIYGNNLGALAMFCVLYPDNIEARDMAKDYMERMAVQPSWL
VKDAPWDEVPLAHSLVGFATAYDFLYNYLSKMQQERFLEVIANASGYMYETSYRRGWGFQYLHNHQPTNC
MALLTGSLILMNQGYLQEAYLWTKQVLTIMEKSLVLLREVTDGSLYEGVAYGSYTTRSLFQYVFLVQRHF
GINHFGHPWLKRHFAFMYRTILPGFQRTVAIADSNYNWFYGPESQLVFLDKFVMRNGSGNWLADQIRRNR
VVEGPGTASKGQRWCTLHTEFLWYDASLKSVPPPDFGTPTLHYFEDWGVVTYGSALPAEINRSFLSFKSG
KLGGRAIHDIVHKNKYKDWIKGWRNFNAGHEHPDQNSFTFAPNGVPFITEALYGPKYTFFNNVLMFSPAV
SKSCFSPWEGQVTEDCSSKWSKYKHDLAANCQGRVVAAAEKDGVVFIRGEAVRAYNPQLKLKNIQRNLIL
LHPQLLLLVDQVHLGEESPLETAASFFHNVDVPFEETVVDGVHGAFIRQRDGLYKMYWMDDTGYSEKATF
ASMTYPRGYPYNGTNYVNVTMHLRRPITRAAYLFIGPSVDVQSFSIHGDWQRLDVFIATSEHAYATYLWT
GETMGQSAFAQVIADRQKILFDQSSAIKSTSVPEVKDYAAVVEQNLQHFKPVFQLLEKQILSRVRNTASF
RETAERLLRFSDKRQTEEAIDRIFAISQQQQQQQSKSKKSRRGGKHYKFVDAVPDIFAQIEVNEKKIRQK
AQILAQKELPIDEDEEMKDLLDFADVTYEKHKNGGLMKGRFGQARMVTTTHSRASSLSASYTRLFLILNI
AIFFVMLAMQLTYFQRTQSLHGQRCLYAVLLIDSCILLWLYSSCSQSQC
>345164
MRTHTRGAPSVFFIHAVCFAFACGAREDPDVMVPFVNANYDSYPMLYFSKGDMEALRLQAATTHQHIAAR
LTEAVQTMLSNPLEYLPPWDPKEFSARWNEIYGNNLGALAMFCVLFPENIEAINMAKDYMERMAAQPSWL
VKDAPWDEVPLAHSLVGFATAYDFLYSYLSKTQQERFLEVIANASGYMYETSYRRGWGFQYLHNHQPTNC
VALLAGSLVLMNQGYLQEAYLWTKQVLAIMEKSVVLLQEVTDGSLYEGVAYGSYTTRSLFQYVFLVQRHF
DINHFSHPWLKQHFAFMYRTVLPGFQRTVAIADSNYNWFYGPESQLVFLDKFVMRNGSGNWLAEQIRRNR
VVEGPGTPSKGQRWCTLHTEFLWYDASLRSVPPPDYGIPKLHYFEDWGVVTYGSALPAEINRPFLSFKSG
KLGGRAIYDIVHKNKYKEWIKGWRNFNAGHEHPDQNSFTFAPNGVPFITEALYGPKYTFFNNVLMFSPAV
AKSCFSPWEGQVTEDCSSKWLKYKHDLAGDCQGRVVAAMERSGVVFIRGEGVGAYNPKLKLRKLQRNLIL
LHPQLLLLVDQIHLEDDSPLEAATSFFHNVDVPFEETVVDDVHGAFIRHRDGIYKMYWMDDTGHSEKATI
ASRMYPRGYPYNGTNYVNVTTLLRHPVTRAIYLFIGPSVDVQSFTVRGDSPQLDVFVTTSEHAYAVYLWP
IEDGSRSAFAQVIADRQKIVFDRASAIRSSTVPEVKDYVGIVERNLQHFKPVFQHLEKQILSRVRNTASF
RKTAERLLRFSDKRQTEEAIDRIFAISQRQQQQQHGRAKKNRKVAKGYKFIDAVPDIFAQIEVNERKVRQ
KAQTQAQKELPVDEDEEMKDLLDFADITYVKHKTGVSVKGRSGLAQMVTTARSSAPSISASYTRLFLILN
IAIFFVMLAMQLTYFQKAKRLHGQRCLYAILLVDSCILLWLYSSCSQSQC
>44394
MRTHTRGAPSVFFIHAVCFAFACGAREDQDTMVPFVNANYDSYPMLYFSKGDVETLRLQASTTHQHIAAR
LIEAVQTMLSNPLEYLPPWDPKEFSARWNEIYGNNLGALAMFCVLFPENMEAINMAKDYMERMAAQPSWL
VKDAPWDEVPLAHSLVGFATAYDFLYSYLSKIQQERFLEVIANASGYMYETSYRRGWGFQYLHNHQPTNC
VALLAGSLVLMNQGYLQEAYLWTKQVLAIMEKSVVLLQEVTDGSLYEGVAYGSYTTRSLFQYMFLVQRHF
DINHFSHPWLKQHFAFMYRTVLPGFQRTVAIADSNYNWFYGPESQLVFLDKFVMRNGSGNWLAEQIRRNR
VVEGPGTPSKGQRWCTLHTEFLWYDASLRSVPPPDYGVPKLHYFEDWGVVTYGSALPAEINRPFLSFKSG
KLGGRAIYDIVHKNKYKEWIKGWRNFNAGHEHPDQNSFTFAPNGVPFITEALYGPKYTFFNNVLMFSPAV
SKSCFSPWEGQITEDCSSKWLKYKHDLAGDCQGRVVAATERSGVVFIRGEGVGAYNPKLKLRKLQRNLIL
LHPQLLLLVDQIHLEDDSPLEAATSFFHNVDVPFEETVVDDVHGAFIRHRDGIYKMYWMDDTGHSEKATI
ASRMYPRGYPYNGTNYVNVTTLLRHPVTRAIYLFIGPSVDVQSFTVRGDSPQLDVFVTTGEHAYAVYLWP
VEDGSRSAFAQVIADRQKIVFDRASAIRSSTVPEVKDYIGIVERNLQHFKPVFQQLEKQILSRVRNTASF
RKTAERLLRFSDKRQTEEAIDRIFAISQRQQQRGRAKKNRKVAKGYKFVDAVPDIFAQIEVNERKVRQKA
QTQAQKELPVDEDEEMKDLLDFADITYVKHKTGMSIKGRSGLAQMVATARSAPSISASYTRLFLILNIAI
FFVMLAMQLTYFQKAKRLHGQRCLYAILLVDSCILLWLYSSCSQSQC
>8128
MRTYTRGAPTVFFISLLWPLLSPAAVAEVDPSGGIPFMGGNYNGHPMLYFSRGDVEQLQYAAAGTHREMA
RRIREAGETMLEHPEEYLPPWSPAEFSARWNEVYGNNLGVLSMFCLLYPHRAGALDLVKDYMERMAAQPS
WLVKDAPWDEVPLAHSLVGFATAYDFLYEYLNKDQQERFLQVIGNASRLMYEKSYVRGWGFQYLHNHQPT
NCVALLTGSLVYMMQGYLQEAYLWTKQVLSIMEKSMVLLQDVTDGSLYEGVAYGTYTTRSLFQYMFLVQR
HFAIGHFDHSWLLKHFAFLYRTILPGFQRTVAIADSNYNWFYGPESQLVFLDRYVLRNGSGNWLADLIHQ
NRVMEGPGQAGKGQRWCTLHTEFIWYDPGLVPKPPSDFGTPKLHYFEDWGVVTYGSALPVKTNSSFLSFK
SGKLGGRAIFDIVHKNKYKEWIKGWRNFNAGHEHPDQNSFTFAPNGVPFITEALYGPKYTLLNNAVLFSS
AFSGSCFKPWAGQVTEACDSKWLKYKVGPAADTQGRVEAAIERKGMVFIRGEGRSAYNPELKIRNVQRNL
LLLHPQLLLVVDHIHLDPDSPVRAMSAFFHNTELPFQGTKVDGVHGAFISHGEDKYKMFWMDDTNYSNKG
VVGYWNYPRGYPYNGSNYVNVTMPLRYPHTRMAYIFFGPDVDVQSFSLRGDNERVDIYLATKDHIYTIYL
LTAEVTSKPLLAMVLLDNKKIVFEKEAAEVNSFPEEVEEYVSVMEDNLQHVKPVFQQMERHILGRVLNTV
SFRKTAERLLQFTDKKKTEEAIEKMFAMSRKQSKGNGGKRVNLGDKLSETLADIFAQIEVNEKKERQRTS
KRTYDDSPEEGDADTRAFVDYADSRKNRKGGFFKGRKFKEVHMVATAGSDSFPSTASYIRLFLLLNMAIF
FLLLAVLLTRFKRGRSLHTQRCFYSILLIDCFILLYLYSSCSHTQC
>48883
MRTHTRGAPSVFFIHAVCFAFACGAREDQDTMVPFVNANYDSYPMLYFSKGDVETLRLQASTTHQHIAAR
LIEAVQTMLSNPLEYLPPWDPKEFSARWNEIYGNNLGALAMFCVLFPENMEAINMAKDYMERMAAQPSWL
VKDAPWDEVPLAHSLVGFATAYDFLYNYLSKIQQERFLEVIANASGYMYETSYRRGWGFQYLHNHQPTNC
VALLAGSLVLMNQGYLQEAYLWTKQVLAIMEKSVVLLQEVTDGSLYEGVAYGSYTTRSLFQYMFLVQRHF
DINHFSHPWLKQHFAFLYRTVLPGFQRTVAIADSNYNWFYGPESQLVFLDKFVMRNGSGNWLAEQIRRNR
VVEGPGTPSKGQRWCTLHTEFLWYDASLRSVPPPDYGVPKLHYFEDWGVVTYGSALPAEINRPFLSFKSG
KLGGRAIYDIVHKNKYKEWIKGWRNFNAGHEHPDQNSFTFAPNGVPFITEALYGPKYTFFNNVLMFSPAV
SKTCFSPWEGQITEDCSSKWLKYKHDLAGDCKGRVVAAMERSGVVFIRGEGVGAYNPKLKLRKLQRNLIL
LHPQLLLLVDQIHLEDDSPLEAATSFFHNVDVPFEETVVDDVHGAFIRHRDGIYKMYWMDDTGHSEKATI
ASRMYPRGYPYNGTNYVNVTTLLRHPVTRAIYLFIGPSVDVQSFTVRGDSPQLDVFVTTGEHAYAVYLWP
VEDGSRSAFAQVIADRQKIVFDRASAIRSSAVPEVKDYIGIVERNLQHFKPVFQQLEKQILSRVRNTASF
RKTAERLLRFSDKRQTEEAIDRIFAISQRQQQQRGRAKKNRKVAKGYKFVDAVPDIFAQIEVNERKVRQK
AQTQAQKELPVDEDEEMKDLLDFADITYVKHKTGVSIKGRSGLAQMVATARSAPSISASYTRLFLILNIA
VFFVMLAMQLTYFQKAKRLHVQRCLYAILLVDSCILLWLYSSCSQSQC
>181119
MRTHTRGAPSVFFIHAVCFAFACGAREERDTMVPFVNANYDSYPMLYFSKGDVEALRLQASTTHQHIAAR
LIEAVQTMLSNPLEYLPPWDPKEFSARWNEIYGNNLGALAMFCVLFPENMEAINMAKDYMERMAAQPSWL
VKDAPWDEVPLAHSLVGFATAYDFLYSYLSKIQQERFLEVIANASGYMYETSYRRGWGFQYLHNHQPTNC
VALLAGSLVLMNQGYLQEAYLWTKQVLAIMEKSVVLLQEVTDGSLYEGVAYGSYTTRSLFQYMFLVQRHF
DINHFSHPWLKQHFAFMYRTVLPGFQRTVAIADSNYNWFYGPESQLVFLDKFVMRNGSGNWLAEQIRRNR
VVEGPGTPSKGQRWCTLHTEFLWYDASLRSVPPPDYGVPKLHYFEDWGVVTYGSALPAEINRPFLSFKSG
KLGGRAIYDIVHKNKYKEWIKGWRNFNAGHEHPDQNSFTFAPNGVPFITEALYGPKYTFFNNVLMFSPAV
SKSCFSPWEGQITEDCSSKWLKYKHDLAGDCQGRVVAATERSGVVFIRGEGVGAYNPKLKLRKLQRNLIL
LHPQLLLLVDQIHLEDDSPLEAATSFFHNVDVPFEETVVDDVHGAFIRHRDGIYKMYWMDDTGHSEKAII
ASRMYPRGYPYNGTNYVNVTTLLRHPVTRAIYLFIGPSVDVQSFTVRGDSPQLDVFVTTGEHAYAVYLWP
IEDGSRSAFAQVIADRQKIVFDQASAIRSSTVPEVKDYIGIVERNLQHFKPVFQQLEKQILSRVRNTASF
RKTAERLLRFSDKRQTEEAIDRIFAISQRQQQQQRGRAKKNRKVAKGYKFVDAVPDIFAQIEVNERKVRQ
KAQTQAQKELPVDEDEEMKDLLDFADNTYVKHKTGMSIKGRSGLAQMVATARSAPSISASYTRLFLILNI
AIFFVMLAMQITYFQKAKRLHGQRCLYAILLVDSCILLWLYSSCSQSQC
>303518
MRTYTRGAPTVFFISLLWPLLSLAAVAEVDPSGGIPFMGGNYNGHPMLYFSRGDVEQLQYAAAGTHQEMA
RRIREAGETMLEHPEEYLPPWSPAEFSARWNEVYGNNLGVLSMFCLLYPHRAGALDLVKDYMERMAAQPS
WLVKDAPWDEVPLAHSLVGFATAYDFLYEYLNKGQQERFLQVIGNASRLMYEKSYVRGWGFQYLHNHQPT
NCVALLTGSLVYMMQGYLQEAYLWTKQVLSIMEKSMVLLQDVTDGSLYEGVAYGTYTTRSLFQYMFLVQR
HFAIGHFDHSWLLKHFAFLYRTILPGFQRTVAIADSNYNWFYGPESQLVFLDRYVLRNGSGNWLADLIHQ
NRVMEGPGQAGKGQRWCTLHTEFIWYDPGLVPKPPSDFGTPKLHYFEDWGVVTYGSALPVKANSSFLSFK
SGKLGGRAIFDIVHKNKYKEWIKGWRNFNAGHEHPDQNSFTFAPNGVPFVTEALYGPKYTLLNNAVLFSS
AFSGSCFKPWAGQVTEACDSKWLKYKVGPAADAQGRVEAAIERKGMIFIRGEGRSAYNPELKIRNVQRNL
LLLHPQLLLVVDHIHLDPDSPVRAMSAFFHNTELPFQGTKVDGVHGAFISHGEDKYKMFWMDDTNYSNKG
VVGYWNYPRGYPYNGSNYVNVTMPLRYPHTRMAYIFFGPGVDVQSFSLRGDNERVDIYLATKKHIYTIYL
LTAEVTSKSLFAMVLLDNKKIVFEKEAAEVSSFPEEVEEYVSLMEDNLQHVKPVFQQMERHILGRVLNTV
SFRKTAERLLQFTDKKKTEEAIEKMFAMSRKQSKGKGGKRVNLGDKLSETLPDIFAQIEVNEKKERQRTS
KRTYDDSPEEGDADTRAFVDYADSRKNRKGGFFKGRKFKEVHMVATAGSDSLPSTASYIRLFLLLNMATF
FSLLAVLLTRFKRGRSLYTQRCFYSILLIDCFILLYLYSSCSHTQC
>109478
MRTHTRGAPSVFFISLLCSVSAYITDENPEVMIPFINANYDSHPMLYFSRAEVAELQLRATSSHEHIAAR
LTEAVHTMLSSPLEYLPPWDPKDFSARWNEIYGNNLGALAMFCVLYPENIEARDMAKDYMERMAAQPSWL
VKDAPWDEVPLAHSLVGFATAYDFLYNYLSKTQQEKFLEVIANASGYMYETSYRRGWGFQYLHNHQPTNC
MALLTGSLVLMNQGYLQEAYLWTKQVLTIMEKSLVLLREVTDGSLYEGVAYGSYTTRSLFQYMFLVQRHF
DINHFGHPWLKQHFAFMYRTILPGFQRTVAIADSNYNWFYGPESQLVFLDKFVMRNGSGNWLADQIRKNR
VVEGPGTPSKGQRWCTLHTEFLWYDASLKSVPPPDFGTPTLHYFEDWGVVTYGSALPAELNRSFLSFKSG
KLGGRAIYDIVHRNKYKDWIKGWRNFNAGHEHPDQNSFTFAPNGVPFITEALYGPKYTFFNNVLMFSPAV
SKSCFSPWEGQVTEDCSSKWSKYKHDLAASCQGRVVAAVERNGVVFIRGEGVGAYNPQLSLKNIQRNLIL
LHPQLLLLVDEVHLGEESLLETATSFFHNVDFPFEETVVDGVHGAFIRQRDGLYKMYWMDDTGYSEKATF
ASVTYPRGYPYNGTNYVNVTMHLRSPITRAAYLFIGPSVDVQSFNIHGDPQQLDVFIATREHAYAVYLWT
DETPGQSAFAQVIADRQKILFDRSSAIKSATVPEVKDYAAIVERNLQHFKPVFQLLEKQILSRVRNTASF
RKTAERLLRFSDKRQTEEAIDRIFAISQQQQQQQQQRKSKKNRRVGKRYKFVDAVPDIFAQIEVNEKKIR
QKAQILAQKEQPIDEDEEMKDLLDFADVTYEKHKNEGLMKGRFGPARMVTTMHSKAPSLSAAYTRLFLIL
NIVIFFVMLAMQLTYFQRAQSLHGQRCLYAVLLVDSCILLWLYSSCSQSQC
>8153
MRTYTRGAPTVFFISLLWPLLSLAAVAEVDPSGGIPFMGGNYNGHPMLYFSRGDVEQLQYAAAGTHQEMA
RRIREAGETMLEHPEEYLPPWSPAEFSARWNEVYGNNLGVLSMFCLLYPHRAGALDLVKDYMERMAAQPS
WLVKDAPWDEVPLAHSLVGFATAYDFLYEYLNKGQQERFLQVIGNASRLMYEKSYVRGWGFQYLHNHQPT
NCVALLTGSLVYMMQGYLQEAYLWTKQVLSIMEKSMVLLQDVTDGSLYEGVAYGTYTTRSLFQYMFLVQR
HFGIGHFDHSWLLKHFAFLYRTILPGFQRTVAIADSNYNWFYGPESQLVFLDRYVLRNGSGNWLADLIHQ
NRVMEGPGQAGKGQRWCTLHTEFIWYDPGLVPKPPSDFGTPKLHYFEDWGVVTYGSALPVKANSSFLSFK
SGKLGGRAIFDIVHKNKYKEWIKGWRNFNAGHEHPDQNSFTFAPNGVPFITEALYGPKYTLLNNAVLFSS
AFSGSCFKPWAGQVTEACDSKWLKYKVGPAADAQGRVEAAIERKGMIFIRGEGSSAYNPELKIRNVQRNL
LLLHPQLLLVVDHIHLDPDSPVRAMSAFFHNTELPFQGTKVDGVHGAFISHGEDKYKMFWMDDTNYSNKG
VVGYWNYPRGYPYNGSNYVNVTMPLRYPHTRMAYIFFGPGVDVQSFSLRGDNERVDIYLATKKHIYTIYL
LTAEVTSKPLFAMVLLDNKKIVFEKEAAEVSSFPEEVEEYVSLMEDNLQHVKPVFQQMERHILGRVLNTV
SFRKTAERLLQFTDKKKTEEAIEKMFAMSRKQSKGKGGKRVNLGDKLSETLPDIFAQIEVNEKKERQRTS
KRTYDDSPEEGDADTRAFVDYADSRKNRKGGFFKGRKFKEVHMVATAGSDSLPSTASYIRLFLLLNMATF
FLMLAVLLTGFKRGRSLYTQRCFYSILLIDCFILLYLYSSCSHTQC
>72004
MRTHTRGAPSVFFICLFCFVSACVTDENPEVMIPFTNANYDSHPMLYFSRAEVAELQLRAASSHEHIAAR
LTEAVNTMLSSPLEYLPPWDPKEYSARWNEIYGNNLGALAMFCVLYPENMEARDMAKDYMERMAAQPSWL
VKDAPWDEVPLAHSLVGFATAYDFLYNYLSKTQQEKFLEVIANASGYMYETSYRRGWGFQYLHNHQPTNC
MALLTGSLVLMNQGYLQEAYLWTKQVLSIMEKSLVLLREVTDGSLYEGVAYGSYTTRSLFQYMFLVQRHF
DINHFGHPWLKQHFAFMYRTILPGFQRTVAIADSNYNWFYGPESQLVFLDKFVMRNGSGNWLADQIRRNR
VVEGPGTPSKGQRWCTLHTEFLWYDASLKSVPPPDFGTPTLHYFEDWGVVTYGSALPAEINRSFLSFKSG
KLGGRAIYDIVHRNKYKDWIKGWRNFNAGHEHPDQNSFTFAPNGVPFITEALYGPKYTFFNNVLMFSPAA
SKSCFSPWEGQVTEDCSSKWSKYKHDPAASCQGRVVAAVEKNGVVFIRGEGVGAYNPQLHLRNVQRNLIL
LHPQLLLLVDQIHLGEDSPLERAASFFHNVDFPFEETVVDGVHGALIRQRDGLYKMYWMDDTGYSEKGTF
ASVTYPRGYPYNGTNYVNVTTHLRSPVTRAAYLFIGPSIDVQSFSIHGDAQQLDVFVATSEHAYATYLWT
GETAGQSAFAQVIADRQKILFDRSSAIRSSVVPEVKDYAVLVEQNLQHFKPVFQLLEKQILSRVRNTASF
RKTAERLLRFSDKRQTEEAIDRIFAISQQQQQQQSKSKKNRRGGKRYKFVDAVPDIFAQIEVNERKVRQK
AQILAQKELPVDEDEEMKDLLDFADITYEKHKNGDVMNGRFGQARMVTTTHSRAPALSASYTRLFLILNI
AIFFVMLAMQLTYFQRAQSLHGQRCLYAVLLIDSCILLWLYSSCSQSQC
>59538
MRTHTRGAPSVFFICLFCFVSACVTDENPEVMIPFTNANYDSHPMLYFSRAEVAELQLRAASSHEHIAAR
LTEAVNTMLSSPLEYLPPWDPKEYSARWNEIYGNNLGALAMFCVLYPENMEARDMAKDYMERMAAQPSWL
VKDAPWDEVPLAHSLVGFATAYDFLYNYLSKTQQEKFLEVIANASGYMYETSYRRGWGFQYLHNHQPTNC
MALLTGSLVLMNQGYLQEAYLWTKQVLTIMEKSLVLLREVTDGSLYEGVAYGSYTTRSLFQYMFLVQRHF
DINHFGHPWLKQHFAFMYRTILPGFQRTVAIADSNYNWFYGPESQLVFLDKFVMRNGSGNWLADQIRRNR
VVEGPGTPSKGQRWCTLHTEFLWYDASLKSVPPPDFGTPTLHYFEDWGVVTYGSALPAEINRSFLSFKSG
KLGGRAIYDIVHRNKYKDWIKGWRNFNAGHEHPDQNSFTFAPNGVPFITEALYGPKYTFFNNVLMFSPAA
SKSCFSPWEGQVTEDCSSKWSKYKHDPAASCQGRVVAAVEKNGVVFIRGEGVGAYNPQLHLRNVQRNLIL
LHPQLLLLVDQIHLGEDSPLERAASFFHNVDFPFEETVVDGVHGALIRQRDGLYKMYWMDDTGYSEKGTF
ASVTYPRGYPYNGTNYVNVTTHLRSPVTRAAYLFIGPSVDVQSFSIHGDAQQLDVFVATSEHAYATYLWT
GETAGQSAFAQVIADRQKILFDRSSAIRSSIVPEVKDYAAVVEQNLQHFKPVFQLLEKQILSRVRNTASF
RKTAERLLRFSDKRQTEEAIDRIFAISQQQQQQQQSKSKKNRRGGKRYKFVDAVPDIFAQIEVNERKVRQ
KAQILAQKELPIDEDEEMKDLLDFADITYEKHKNGDVINGRFGQARMVTTTHSRAPALSASYTRLFLILN
IAIFFVMLAMQLTYFQRAQSLHGQRCLYAVLLIDSCILLWLYSSCSQSQC
>7897
MKTYTRGAPTVFFLNLVCCMVAFSKQETPGAGIYFLNGNYDGHPMLYFGKADVKELQLKARGTHRHIAAR
ITEAVQTMLSNPEEYLPPWEPKDFSARWNEIYGNNLGALAMFCMLYPDNTEAMQLAMEYMDRMAAQPSWL
VKDAPWDEVPLAHSLVGFSTAYDFLYNYLNKSQQERYLGVIANASSYMYEKSYSRGWGFQYLHNHQPTNC
IALLTGSLILMNQGYLQEAYLWTKQALAIMEKFMVLLRDVTDGSLYEGVAYGSYTTRSLFQYMFLVQRHF
NIGHFNHPWVKQHFAFLYKTILPGFQRSVAIADSNYNWFYGPESQLVFLDNYILRNGSGNWLAEQIRRNR
KVEGPGTPAKGHRWCTLHTEFLWYDATLAPAPPLDFGIPRLHYFEDWGVVTYGSALPVEINKSFLSFKSG
KLGGRAIHDIVHSNKYKSWIKGWRNFNAGHEHPDQNSFTFAPNGVPFITEALYGPKYTFLNNVAMFSPAV
SDSCFAPWEGQVTEACTSKWLKYKHGAAANSKGQIVATLERGGMVFIRGEGVGAYSPSLKLRSVQRNLVL
LHPQLLLLVDQIHLEVDSPVEAMATFFHNTDVPFEETVIDGVHGAFIRQNDDLYKMFWMDDAGFSEKAVV
AYRSYPRGYSYNGSNYVNVTMPLRNPITRVAYIFIGPSMDVHSFSIRGDSQRVDVYIGTAKHTYTVYLLT
GETTSKPLFAMVLADRTKIVFEKASAIREDAVPEVENYMDILEENLQHAKPVFQQLEKQILAHVLNTDNF
RKTAERLLKFSDKKKSEETIEKIFAISRQQGKIKKSKKGGSVDKFSDNLPDIFAQIEQNEKKERQKVLQR
LQDEAPDESEEEMKDLYDFVDPHYLSNKKGPMNKKRRFGNTQMVSTARSTAQSVSASYTRLFLILNIATF
LFLLTLQLTRFQKAQSLQAQRCLYAILLVDSFILLCLYSSCSRAKC
>59463
MRTHTRGAPSVFFISLLCSVSAYITDENPEVMIPFTNANYDSHPMLYFSRAEVAELQLRATSSHEHIAAR
LTEAVHTMLSSPLEYLPPWDPKDFSARWNEIYGNNLGALAMFCVLYPENIEARDMAKDYMERMAAQPSWL
VKDAPWDEVPLAHSLVGFATAYDFLYNYLSKTQQEKFLEVIANASGYMYETSYRRGWGFQYLHNHQPTNC
MALLTGSLVLMNQGYLQEAYLWTKQVLTIMEKSLVLLREVTDGSLYEGVAYGSYTTRSLFQYMFLVQRHF
DINHFGHPWLKQHFAFMYRTILPGFQRTVAIADSNYNWFYGPESQLVFLDKFVMRNGSGNWLADQIRKNR
VVEGPGTPSKGQRWCTLHTEFLWYDASLKSVPPPDFGTPTLHYFEDWGVVTYGSALPAELNRSFLSFKSG
KLGGRAIYDIVHRNKYKDWIKGWRNFNAGHEHPDQNSFTFAPNGVPFITEALYGPKYTFFNNVLMFSPAV
SKSCFSPWEGQVTEDCSSKWSKYKHDLAASCQGRVVAAVERNGVVFIRGEGVGAYNPQLSLKNIQRNLIL
LHPQLLLLVDEVHLGEESLLETATSFFHNVDFPFEETVVDGVHGAFIRQRDGLYKMYWMDDTGYSEKATF
ASVTYPRGYPYNGTNYVNVTMHLRSPITRAAYLFIGPSVDVQSFSIHGDPQQLDVFIATGEHAYAVYLWT
DETPGQSAFAQVIADRQKILFDRSSAIKSATVPEVKDYAAIVERNLQHFKPVFQLLEKQILSRVRNTASF
RKTAERLLRFSDKRQTEEAIDRIFAISQQQQQQQQRKSKKNRRVGKRYKFVDAVPDIFAQIEVNEKKIRQ
KAQILAQKEQPIDEDEEMKDLLDFADVTYEKHKNEGLMKGRFGPARMVTTMHSKAPSLSASYTRLFLILN
IVIFFVMLAMQLTYFQRAQSLHGQRCLYAVLLVDSCILLWLYSSCSQSQC
>246437
MGSFEDGLAALEIWRSDATMRTHTRGAPSVFFIYLLCFVSAYISDENPEVMLPFTNANYDSHPMLYFSRE
EVAELQLRATSSHEHIAARITEAVHTMLSSPLEYLPPWDPKDYSARWNEIYGNNLGALAMFCVLYPENIE
ARDMAKDYMERMAAQPSWLVKDAPWDEVPLAHSLVGFATAYDFLYNYLSKTQQEKFLEVIANASGYMYET
SYRRGWGFQYLHNHQPTNCMALLTGSLVLMSQGYLQEAYLWTKQVLTIMEKSLVLLREVTDGSLYEGVAY
GSYTTRSLFQYMFLVQRHFDINHFGHPWLKQHFAFMYRTILPGFQRTVAIADSNYNWFYGPESQLVFLDK
FVMRNGSGNWLADQIRKNRVVEGPGTPSKGQRWCTLHTEFLWYDASLKSVPPPDFGTPVLHYFEDWGVVT
YGSALPAEINRSFLSFKSGKLGGRAIYDIVHRNKYKDWIKGWRNFNAGHEHPDQNSFTFAPNGVPFITEA
LYGPKYTFFNNVLMFSPAVSKSCFSPWEGQVTEDCSSKWLKYKHDLAASCQGRVVAALEKNGVVFIRGEG
VGAYNPQLNLKNVQRNLILLHPQLLLLVDQIYLGEESPLETAASFFHNVDVPFEETMVDGVHGAFIRQRD
GLYKMYWMDDTGYSEKATFASVTYPRGYPYNGTNYVNVTMHLRSPITRIAYLFIGPSVDVQSFSIHGDSQ
QLDVFIATSEHAYATYLWTGETTGQSAFAQVIADRQKILFDRNSAIKSTFVPEVKDYAAIVEQNLQHFKP
VFQLLEKQILSRVRNTASFRKTAERLLRFSDKRQTEEAIDRIFAISQQQQKQQSKSKKNRRAGKRYKFVD
AVPDIFAQIEVNEKKIRQKAQILAQKELPIDEDEEMKDLLDFADITYEKHKNGLLKGRFGQARMATTHSR
APSLSASYTRLFLILNIAIFFVMLAMQLTYFQRAQSLHGQRCLYVVLLIDSCILLWLYSSCSQSQC
>8496
MRTHTRGAPSVFFINVVYFALAYSTDENPRTVIPFINANYDSYPMLYFSKGEVGDLRLKAVTTHQHITDR
LTEAVQTMLSNPLEYLPPWDPKEFSSRWNEIYGNNLGALAMFCVLYPENLEAINMAKDYMERMAAQPSWL
VKDAPWDEVPLAHSLVGFATAYDFLYNYLSKNQQERFLEVIANASGYMYETSYRRGWGFQYLHNHQPTNC
VALLAGSLVLMNQGYLQEAYLWTKQVLAIMEKSIVLLQEVTDGSLYEGVAYGSYTTRSLFQYIFLVQRHF
GINHFNHPWLKQHFAFMYRTVLPGFQRTVAIADSNYNWFYGPESQLVFLDKFIMRNGSGNWLADQIRKNR
VVEGPGTPSKGQRWCTLHTEFLWYDASLHSVPPPDYGIPKLHYFEDWGVVTYGSALPAEINRPFLSFKSG
KLGGRAIYDIVHKNKYKEWIKGWRNFNAGHEHPDQNSFTFAPNGVPFITEALYGPKYTFFNNVLMFSPAM
SKSCFFPWEGQITEDCSSKWLKYKHDLAGDCQGRVVAAMERSGVVFIRGEGVGAYNPKLKLKNFQRNLVL
LHPQLLLLVDQIHLEDDSPLEATTSFFHNVDMPFEETVIDNVHGAFIRHRDGMYRMFWMDDAGYSEKATI
ASKMYPRGYPYNGTNFVNVTTHLRHPITRGVYLFIGPSIDVQSFDVRGDSEQLDVFVTTSEHSYAIYLWT
VETGAHSVFAQVIADRQKIMFDHVSAIKSSAVPEVEDYVGIVEQNLQNFKPVFQQLEKQILSRVRNTDSF
RKTAERLLRFSDKRQTEEAIDRIFAISQQQQHQQQGREKKSKKVAKGYKFVDAVPDIFAQIEVNERKVRQ
KAQTQAQNELPVNEDEEMKDLLDFADVTYVKHKTGASLKGQSGLAHMVTTARSSASLVSASYTRLFLILN
IAIFFVMLAMQLTCFQRAKSLHGQRCLYAVLLVDSCILLWLYSSCSQSQC
>8665
MRNGSGNWLADQIRRNRVLEGPGTPSKGQRWCTLHTEFLWYDSSLGFVPPPDYGIPKLHYFEDWGVVTYG
SALPAEINSPFLSFKSGKLGGRAIYDIVHQNKYKEWIKGWRNFNAGHEHPDQNSFTFAPNGVPFITEALY
GPKYTFLNNVLMFSPAVSKSCFYPWEGQITEDCSSKWLKYKHDLAADCQGKVIAAIEKNEIIFIRGEGVG
AYHPKLKLKSVQRNLLLLHPQLLLLVDQIYLQEDSPAKVATSFFHNVDVPFEDTVIDNVHGAFIRQQDGN
YKMYWMDDTGHSQKAIIASRMYPRGYPYNGTNYVNVTTHLRSPITRVVYLFIGPSIDVQSFSVHGNSQQL
DIFVTTSEHAYAIYLWTDENKSHSVFAQVIADHQKIVFERASAVRNSPVSGVKGNIEIVEKNLQHFKPVF
QQLEKQILSRVRNTDSFRKTAERLLRFSDKRQTEEVIDRIFAISQQQQGRAKKNKKVAKGYKFVDAGPDI
FAQIEVNERKIRQKAQSLAQKEMPVDEEEEMKDLLDFADITYVKERNSVPIKVQPGLSQIFSTARSSAPL
VSASYTRLFLLLNIVIFFVMLAMQLTWFQKAKSLHGQRCLYAILLIDSCILLWLYSSCSQSQC
>7918
MRTYTRGAPTVFFITLFCFSLALSLEEDPSGGIPFLGGNYDGHPMLYFSREEVGALQRQGRGTHLHIAAK
IQEAGRTMLAHPEEYLPPWSPADFSARWNEIYGNNLGVLSMFCVLFPETERALDLAREYMERMAAQPSWL
VKDAPWDEVPLAHSLVGFATAYDFLYGDLSRSQQERFLQVIANTSRYMYEKSYNRGWGFQYLHNHQPTNC
VALLTGSLVLMNQGYLQEAYLWTKQVLAIMEKSLVMLQDITDGSLYEGVAYGTYTSRSLFQYMFLVQRHF
GIGHFHHPWLKQHFAFLYRTILPGFQRSVAIADSNYNWFYGPESQLVFLDSYVMRNGSGNWLAEMIRKNR
VVDGPGQAGKGQRWCTLHTEFIWYNPNLTSTAPADFGKPRLHYFEDWGVVTYGSALPAGINRTFLSFKSG
KLGGRAIFDIVHRNKYKDWIKGWRNFNAGHEHPDQNSFTFAPNGVPFITEALYGPKYTFLNNVVMFSPAA
SDSCFAPWEGQVTEACTSKWLKYKQGAAADCQGKVVAALERNGMVFIRGEGKGAYSPGLKIKSFQRNLLL
LQPQLLLLVDHVHLESDSPVGLMSSYFHNTDLPFEETVKDGVHGAFIRHRDGLYKMFWMDDTGYSDKGVL
GYRNYPRGYPYNGSNYVNVTLPLRNPNSRGVFIFFGPDMDVQSFSIRSDAQRVDIYLATSEHTYTVYLLT
GEVTSKPLFAMVLADHEKVVFEKASGVKESSPAEVNNYANFVEDNLQHAKPVFQQLQKQILARVLNTDNF
RKTAERLLDFSDQKKTEEIIEKMFTLKKKQNRNKNSKKGALADKLSDGLPDIFAQIEVNEKKERQKAMKR
VYDEDIEEADGDARAFLDYSDLRLPKGRKSGIFKQRKYKELPMVSTDRSTDPLISASYIRLFLILNIATF
FFLLALLLTRFQKTQGLHTKRCFYGIVLVDSFILLCLYSSCSRAQC
>32507
MRTYTRGAPTVFFISLLWPLLSPAAVAEVDPSGGIPFMGGNYNGHPMLYFSRGDVEQLQYAAAGTHREMA
RRIREAGETMLEHPEEYLPPWSPAEFSARWNEVYGNNLGVLSMFCLLYPHRAGALDLVKDYMERMAAQPS
WLVKDAPWDEVPLAHSLVGFATAYDFLYEYLNKGQQERFLQVIGNASRLMYEKSYVRGWGFQYLHNHQPT
NCVALLTGSLVYMMQGYLQEAYLWTKQVLSIMEKSMVLLQDVTDGSLYEGVAYGTYTTRSLFQYMFLVQR
HFAIGHFDHSWLLKHFAFLYRTILPGFQRTVAIADSNYNWFYGPESQLVFLDRYVLRNGSGNWLADLIHQ
NRVMEGPGQAGKGQRWCTLHTEFIWYDPGLVPKPPSDFGTPKLHYFEDWGVVTYGSALPVKTNSSFLSFK
SGKLGGRAIFDIVHKNKYKEWIKGWRNFNAGHEHPDQNSFTFAPNGVPFVTEALYGPKYTLLNNAVLFSS
AFSGSCFKPWAGQVTEACDSKWLKYKMGPAADAQGRVEAAIERKGMIFIRGEGRSAYNPELKIRNVQRNL
LLLHPQLLLVVDHIHLDPDSPVRAMSAFFHNTELPFQGTKVDGVHGAFISHGEDKYKMFWMDDTNYSNKG
VVGYWNYPRGYPYNGSNYVNVTMPLRYPHTRMAYIFFGPGVDVQSFSLRGDNERVDIYLATKKHIYTIYL
LTAEVTSKPLFAMVLLDNEKIVFEKEAAEVSSFPEEVEEYVSLMEDNLQHVKPVFQQMERHILGRVLNTV
SFRKTAERLLQFTDKKKTEEAIEKMFAMSRKQSKGKGGKRVNLGDKLSETLPDIFAQIEVNEKKERQRTS
KRTYDDSPEEGDADTRAFVDYADSRKNRKGGFFKGRKFKEVHMVATAGSDSLPSTASYIRLFLLLNMATF
FLLLAVLLTRFKRGRSLYTQRCFYSILLIDCFILLYLYSSCSHTQC
>225400
MRTHTRGAPSVFFIALLCSVSAYITDENPEVMIPFTNANYDSHPMLYFSRAEVAELQLRAASSHEHIAAR
LTEAVHTMLSSPLEYLPPWDPKDFSARWNEIYGNNLGALAMFCVLYPENIEARDMARDYMERMAAQPSWL
VKDAPWDEVPLAHSLVGFATAYDFLYNYLSKTQQEKFLEVIANASGYMYETSYRRGWGFQYLHNHQPTNC
MALLTGSLVLMNQGYLQEAYLWTKQVLTIMEKSLVLLREVTDGSLYEGVAYGSYTTRSLFQYMFLVQRHF
DINHFGHPWLKQHFAFMYRTILPGFQRTVAIADSNYNWFYGPESQLVFLDKFVMRNGSGNWLADQIRKNR
VVEGPGTPSKGQRWCTLHTEFLWYDASLKSVPPPDFGTPTLHYFEDWGVVTYGSALPAELNRSFLSFKSG
KLGGRAIYDIVHRNKYKDWIKGWRNFNAGHEHPDQNSFTFAPNGVPFITEALYGPKYTFFNNVLMFSPAV
SKSCFSPWEGQVTEDCSSKWSKYKHDLAASCQGRVVAAVERNGVVFIRGEGVGAYNPQLSLKNIQRNLIL
LHPQLLLLVDEVHLGEESLLETATSFFHNVDFPFEETVVDGVHGAFIRQRDGLYKMYWMDDTGYSEKATF
ASVTYPRGYPYNGTNYVNVTMHLRSPITRAAYLFIGPSVDVQSFSIHGDPQQLDVFIATREHAYAVYLWT
DEDPGQSAFAQVIADRQKILFERSSAIKSTAVPEVKDYAAIVERSLQHFKPVFQLLEKQILSRVRNTASF
RKTAERLLRFSDKRQTEEAIDRIFAISQQQQQQQQRKSIKNRRVGKRYKFVDAVPDIFAQIEVNEKKIRQ
KAQILAQKEQPIDEDEEMKDLLDFADVTYEKHKNEGLMKGRFGPARMVTTMHSKAPSLSASYTRLFLILN
IVIFFVMLAMQLTYFQRAQSLHGRRCLYAVLLVDSCILLWLYSSCSQSQC
>9713
MRTHTRGAPSVFFICLFCLVSASITDENPEVMIPFTNADYNSHPMLYFSRAEVAELRLQAASSHEHIAAR
LTEAVHAMLSSPLEYLPPWDPKDYSARWNEIYGNNLGALAMFCVLYPENMEARDMAKDYMERMAAQPSWL
VKDAPWDEVPLAHSLVGFATAYDFLYNYLSKTQQEKFLEVIANVSGYMYETSYRRGWGFQYLHNHQPTNC
MALLTGSLVLMNQGYLQEAYLWTKQVLTIMEKSLVLLREVTDGSLYEGVAYGSYTTRSLFQYMFLVQRHF
DINHFGHPWLKQHFAFMYRTILPGFQRTVAIADSNYNWFYGPESQLVFLDKFVMRNGSGNWLADQIRRNR
VTEGPGTPSKGQRWCTLHTEFLWYDASLKSVPPPDFGTPTLHYFEDWGVVTYGSALPAEINRSFLSFKSG
KLGGRAIYDIVHRNKYKEWIKGWRNFNAGHEHPDQNSFTFAPNGVPFITEALYGPKYTFFNNVLMFSPAV
SKSCFSPWEGQVTEDCSSKWSKYKQDLAASCQGRVVAAEEKNGVVFIRGEGVGAYNPRLDLKSVQRNLIL
LHPQLLLLVDQIHLGEESPLESAASFFHNVDVPFEETVVDGVHGAFIRQRDGLYKMYWMDDTGYSEKATF
ASATYPRGYPYNGTNYVNVTVHLRSPITRTAYLFIGPSVDVQSFSIHGDSQQLGVFIATSQHAYAAYLWS
GESTAQPAFAQVIADRRRILFDRSSAIKSTSVAEVKDYAAVVDQNLQRFKPVFQQLEKQILSRVQNTASF
RKTAERLLRFSDKRQTEEAIDRIFAISQQQQQQSKSKRNRRVGKRYKFVDAVPDIFAQIEVNEKKIRQKA
QILAQKELPIDEDEEMKDLLDFADVTYEKHKNGGSLKGRFGQARMMTTTRSRARSLSSSYTRLFLILNIA
IFFVMLAMQLTYFQRAQSLHGQRCLYAVLLIDSCILLWLYSSCSQSQC
>28737
MRTHTRGAPSVFFIYLFCFVSAYITDENPDVMIPFTNANYDSHPMLYFSKADVEELQLRASGTHEHIAAR
LTEAVHTMLSSPLEYLPPWDPKEYSARWNEIYGNNLGALAMFCVLFPENLEARDMAKDYMERMAAQPSWL
VKDAPWDEVPLAHSLVGFATAYDFLYNYLSKTQQEKFLEVIANASGYMYETSYRRGWGFQYLHNHQPTNC
MALLTGSLVLMNQGYLQEAYLWTKQVLTIMEKSLVLLREVTDGSLYEGVAYGSYTTRSLFQYMFLVQRHF
DINHFGHPWLKQHFAFMYRTVLPGFQRTVAIADSNYNWFYGPESQLVFLDKFVMRNGSGNWLADRIRRSR
VQEGPGTPSKGQRWCTLHTEFLWYDANLKSVPPPDFGTPTLHYFEDWGVVTYGSALPAEINRSFLSFKSG
KLGGRAIYDIVHRNKYKDWIKGWRNFNAGHEHPDQNSFTFAPNGVPFITEALYGPKYTFFNNVLMFSPAV
SKSCFFPWEGQVTEDCSSKWSKYKHDLAANCQGRVVAAMEKNGVVFIQGEGVGAYNPHLHLKNVQRNLIL
LHPQLLLLVDQIHLGEESPLETTSSFFHNVDVPFEETVVDGVHGAFIRQRDGLYKMYWMDDTGYSEKATF
ASVTYPRGYPYNGTNYVNVTMHLRSPITRAAYLFIGPSVDVQSFSIHGDSQQLNVFIATGKHAYATYLWT
GEPTGQSAFAQVIADRQKILFDRSSAIKSTTVPEVKEYAAIVEQNLQRFKPVFQLLEKQILSRVRNTASF
RKTAERLLRFSDKRQTEEAIDRIFAISQQQQQQQSKSKKNRRAGKRYKFVDAVPDIFAQIEVNEKKIRQK
AQILAQKELPIDEDEEMKDLLDFADVTYEKHKSSGLVKGRFGHARMMTTTRSRGSSLSASYTRLFLILNI
AIFFVMLAMQLTYFQRAQSLHGQRCLYAVLLVDSCILLWLYSSCSQSQC
>185453
MRTHTRGAPSVFFIYLFGFVSAYITDEDPRVMIPFTNANYDSHPMLYFSKAEVAELRIRASSTHEHIAAR
LTEAVHTMLSSPLEYLPPWDPKDYSARWNEIYGNNLGALAMFCVLYPENIEARDMAKDYMERMAAQPSWL
VKDAPWDEVPLAHSLVGFATAYDFLYNYLSKMQQEKFLEVIANASGYMYETSYRRGWGFQYLHNHQPTNC
MALLTGSLVLMNQGYLQEAYLWTKQVLTIMEKSLVLLREVTDGSLYEGVAYGSYTTRSLFQYMFLVQRHF
DINHFGHPWLKQHFAFMYRTILPGFQRTVAIADSNYNWFYGPESQLVFLDKFVMRNGSGNWLADQIRKNR
VIEGPGTPSKGQRWCTLHTEFLWYDASLKSVPPPDFGTPTLHYFEDWGVVTYGSALPAEINRSFLSFKSG
KLGGRAIYDIVHRNKYKDWIKGWRNFNAGHEHPDQNSFTFAPNGVPFITEALYGPKYTFFNNVLMFSPAV
SKSCFAPWEGQVTEDCSSKWSKYKHDLAANCQGRVVAAVEKNGMVFIRGEGVGAYNPRLSLKNVQRNLIL
LHPQLLLLVDQIYLGEESPLETAASFFHNVDVPFEETVVDGVHGAFIRQRDGLYKMYWMDDTGYSEKATF
ASVTYPRGYPYNGTNYVNVTTHLRSPITRAAYLFIGPSVDVQSFSIHGDSQQLDVFIATSEHAYATYLWT
GESTGQSAFAQVIADHQKITFDQSSVIKSTLVPEVKDYAAIVEQNLQRFKPVFQLLEKQILSRVQNTASF
RKTAERLLRFSDKRQTEEAIDRIFAISQQQQQQQSKSKKNRRAGKRYKFLDAVPDIFAQIEVNEKKIRQK
AQILAQKELPIDEDEEMKDLLDFADVTYEKHKNGGLVKGQFGQARMVTTTHSKASSLSASYTRLFLILNI
AIFFVMLAMQLTYFQKAQSLHGQRCLYAVLLIDSCILLWLYSSCSQSQC
>9402
MRTHTRGAPSVFFICLFCFVSAYITDNSPEVMIPFTNANYDSHPMLYFSRAEVTELQLRAASSHEHIAAR
LTEAVHTMLSSPLEYLPPWDPKDYSARWNEIYGNNLGALAMFCVLYPENIEARDMAKDYMERMAAQPSWL
VKDAPWDEVPLAHSLVGFATAYDFLYSYLSKTQQERFLEVIANASGYMYETSYRRGWGFQYLHNHQPTNC
MALLTGSLVLMNQGYLQEAYLWTKQVLTIMEKSLVLLREVTDGSLYEGVAYGSYTTRSLFQYMFLVQRHF
DINHFGHPWLKQHFAFMYRTILPGFQRTVAIADSNYNWFYGPESQLVFLDKFVMRNGSGNWLADQIRKNR
VMEGPGTPSKGQRWCTLHTEFLWYDASLKSVPPPDFGTPTLHYFDDWGVVTYGSALPAEINRSFLSFKSG
KLGGRAIYDIVHRNKYKDWIKGWRNFNAGHEHPDQNSFTFAPNGVPFITEALYGPKYTFFNNALMFSPAV
SKSCFSPWEGQVTEDCSSKWSKYKHDLAASCQGRVVAAVEKNGVVFIRGEGVGAYNPQLNLKNVRRNLIL
LHPQLLLLVDEIHLGEESPLETAASFFHNVDFPFEETVVDGVHGAFIRQRDGLYKMYWMDDTGYSKKATF
ASVTYPRGYPYNGTNYVNVTMHLRSPITRAAYLFIGPSVDVQSFSIHGDSQQLDVFIATSKHAYAIYLWT
GEITGQSAFAQVIADRQKILFDRSSAIKSTIVPEVKDYAAVVEQNLQRFKPVFQLLEKQILSRVRNTASF
RKTAERLLRFSDKRQTEEAIDRIFAISQQHQQQQSKSKKNRKAGKRYKFVDAVPDIFAQIEVNEKKIRQK
AQILAQKELPIDEDEEMKDLLDFADVTYEKHKNNGLIKGRFGQERMMTTTHSKASSLSASYTRLFLILNI
AIFFVMLAMQLTYFQRAQSLHGQRCLYAVLLIDSCILLWLYSSCSQSQC
>230844
MRTHTRGAPSVFFICLLGLVSAYMTDENPEVMIPFTNANYDSHPMLYFSRTEVAELQLRAASSHEHIAAR
LTEAVHTMLSNPLEYLPPWDHKDYSARWNEIYGNNLGALAMFCVLYPENIEARDMAKDYMERMAAQPSWL
VKDAPWDEVPLAHSLVGFATAYDFLYNYLSKTQQETFLEVIANASGYMYETSYRRGWGFQYLHNHQPTNC
MALLTGSLVLMNQGYLQEAYLWTKQVLTIMEKSLVLLREVTDGSLYEGVAYGSYTTRSLFQYMFLVQRHF
DINHFGHPWLKQHFAFMYRTILPGFQRTVAIADSNYNWFYGPESQLVFLDKFVMRNGSGNWLADQIRKNR
VVEGPGTPSKGQRWCTLHTEFLWYDASLKSVPPPDFGTPTLHYFEDWGVVTYGSALPAEINRSFLSFKSG
KLGGRAIYDIVHRNKYKDWIKGWRNFNAGHEHPDQNSFTFAPNGVPFITEALYGPKYTFFNNVLMFSPAV
SKSCFSPWEGQVTEDCSSKWSKYKHDLAASCQGRVVAAEEKNGVVFIRGEGIGAYNPLLNLKNIQRNLIL
LHPQLLLLVDQIHLGEESPLETAASFFHNVDVPFEETVVDGVHGAFIRQRDGLYKMYWMDDTGYSEKATF
ASVTYPRGYPYNGTNYVNVTMHLRSPITRAAYLFIGPSVDVQSFSIHGDAQRLDVFVATNEHAYATYLWT
GENTGQSAFAQVIADRQKILFDRSSAIKSTTVPEVEDYAAIVEHSLQHFKPVFQLLEKQILSRVQNTASF
RKTAERLLRFSDKRQTEEAIDRIFAISQQQRQQQGKSKKSRRAGKRYKFVDAVPDIFAQIEVNEKKVRQK
AQILAQKELPIDEDEEMKDLLDFADVTYEKHKSGGPGHGGFGHMRMVTSHNRAPSLSASYTRLFLILNIA
IFFVMLAMQLTYFQRAQSLHGQRCLYAVLLIDSCVLLWLYSSCSQSQC
>74533
MRTHTRGAPSVFFIYLFCFVSAYVTDENPEVMIPFTNAHYDSHPMLFFSRDEVAELQLRAAGSHEHIAAR
LTEAVHTMLSSPLEYLPPWDPKDYSARWNEIYGNNLGALAMFCVLYPENIEARDMAKDYMERMAAQPSWL
VKDAPWDEVPLAHSLVGFATAYDFLYNYLSKTQQEKFLEVIANVSGYMYETSYRRGWGFQYLHNHQPTNC
MALLTGSLVLMNQGYLQEAYLWTKQVLTIMEKSLVLLREVTDGSLYEGVAYGSYTTRSLFQYMFLVQRHF
DINHFGHPWLKQHFAFMYRTILPGFQRTVAIADSNYNWFYGPESQLVFLDKFVMRNGSGNWLADQIRRNR
VVEGPGTPSKGQRWCTLHTEFLWYDASLKSVPPPDFGTPTLHYFEDWGVVTYGSALPAEINRSFLSFKSG
KLGGRAIYDIVHRNKYKDWIKGWRNFNAGHEHPDQNSFTFAPNGVPFITEALYGPKYTFFNNVLMFSPAV
SKSCFSPWEGQVTEDCSSKWSKYKHDLAASCQGRVVAAVEKNGVVFIRGEGVGAYNPQLNLRSVQRNLIL
LHPQLLLLVDQIHLGEDSPLETAASFFHNVDVPFEETVVDGVHGAFIRQRDGLYKMYWMDDTGYSEKATF
ASVTYPRGYPYNGTNYVNVTMHLRSPITRTAYLFIGPSVDVQSFSIHGDSQQLDVFVATSQHAYATYLWT
GETTGQSAFAQVIADRQKILFDRSSAIKSTTVPEVKDYAAIVEQNLQHFKPVFQLLEKQILSRVRNTASF
RKTAERLLRFSDKRQTEEAIDRIFAISQQQQQQQSKSKKNRRAGKRYKFVDAVPDIFAQIEVNEKKIRQK
AQILAQKELPIDEDEEMKDLLDFADVTYEKHKNGGLMKGRFGQTRMMTTRSRAPSASYTKLFLILNIAIF
FVMLAMQLTYFQRAQSLHGQRCLYAVLLIDSCILLWLYSSCSQSQC
>8469
MKEDEVYSYNSLSSGYVKDGLAAIETWRSDATMRTHTRGAPSVFFIHVVCFALASSTDENPSAVIPFVNA
NYDSYPMLYFSKGEVEDLRIKAATTHQHIAARLTEAVQTMLSSPLDYLPPWDPKEFSARWNEIYGNNLGA
LAMFCVLYPKNIEAINMAKDYMERMAAQPSWLVKDAPWDEVPLAHSLVAFATAYDFLYNYLSKTEQERFL
EVIANASGYMYETSYRRGWGFQYLHNHQPTNCMALLAGSLVLMNQGYLQEAYLWTKQVLSIMEKSIVLLR
EVTDGSLYEGVAYGSYTTRSLFQYMFLVQRHFDINHFNHPWLKEHFAFMYRTVLPGFQRTVAIADSNYNW
FYGPESQLVFLDKFVMRNGSGNWLADQIRRNRVVEGPGTPSKGQRWCTLHTEFLWYDASLHSVPPPDYGI
PKLHYFEDWGVVTYGSALPAEINRPFLSFKSGKLGGRAIYDIVHKNKYKEWVKGWRNFNAGHEHPDQNSF
TFAPNGVPFITEALYGPKYTFFNNVLMFSPAVSKSCFSPWEGQVTEDCSSKWLKYKHDLAADCQGRVVAA
MERSGVVFIRGEGVGAYNPELKLKNFQRNLLLLHPQLLLLVDLIHLEDDSPLEAATSFFHNVDVPFEETV
IDDVHGAFIRHHDGMYKMYWMDDTGYSEKATVASKMYPQGYPYNGTNYVNVTTHLRNPITRAVYLFIGPS
IDVQSFNVHGDSQQLDVFIATSEHAYAVYLWTGEDGGHSVFAQIIADRQKILFDRTSTIRNSAVSEVKDY
VQIVEQNLQHFKPVFQQLEKQILSHVRNTDSFRKTAERLLRFSDKRQTEEAIDRLFAISQQQQQQGRAKK
SKKVAKSYKFVDAVPDIFAQIEVNERKVRQKAQTQAQKELPVDEDEEMKDLLDFVDITHVKHKNGASIKG
QSGLEQMVSTARSSAPSISASYTRLFLILNIFIFFVMLAMQMTYFQKAKSLHGQRWLYAILLVDSCILLW
LYSSCSQSQC
>89462
MRTHTRGAPSVFFICLFCFVSACVTDENPEVMIPFTNANYDSHPMLYFSRAEVAELQLRAASSHEHIAAR
LTEAVNTMLSSPLEYLPPWDPKEYSARWNEIYGNNLGALAMFCVLYPENMEARDMAKDYMERMAAQPSWL
VKDAPWDEVPLAHSLVGFATAYDFLYNYLSKTQQEKFLEVIANASGYMYETSYRRGWGFQYLHNHQPTNC
MALLTGSLVLMNQGYLQEAYLWTKQVLTIMEKSLVLLREVTDGSLYEGVAYGSYTTRSLFQYMFLVQRHF
DINHFGHPWLKQHFAFMYRTILPGFQRTVAIADSNYNWFYGPESQLVFLDKFVMRNGSGNWLADQIRRNR
VVEGPGTPSKGQRWCTLHTEFLWYDASLKSVPPPDFGTPTLHYFEDWGVVTYGSALPAEINRSFLSFKSG
KLGGRAIYDIVHRNKYKDWIKGWRNFNAGHEHPDQNSFTFAPNGVPFITEALYGPKYTFFNNVLMFSPAA
SKSCFSPWEGQVTEDCSSKWSKYKHDPAASCQGRVVAAVEKNGVVFIRGEGVGAYNPQLHLRNVQRNLIL
LHPQLLLLVDQIHLGEDSPLERAASFFHNVDFPFEETVVDGVHGALIRQRDGLYKMYWMDDTGYSEKGTF
ASVTYPRGYPYNGTNYVNVTTHLRSPITRAAYLFIGPSVDVQSFSIHGDAQQLDVFVATSEHAYATYLWT
GETAGQSAFAQVIADRQKILFDRSSAIRSSVVPEVKDYAALVEQNLQHFKPVFQLLEKQILSRVRNTASF
RKTAERLLRFSDKRQTEEAIDRIFAISQQQQQQQSKSKKNRRGGKRYKFVDAVPDIFAQIEVNERKVRQK
AQILAQKELPVDEDEEMKDLLDFADITYEKHRNGDVMNGRFGQARMAATTHSRAPALSASYTRLFLILNI
AIFFVMLAMQLTYFQRAQSLHGQRCLYAVLLIDSCILLWLYSSCSQSQC
>310752
MRTHTRGAPSVFFIYLFCFVSAYVTDENPEVMIPFMNANYDSHPMLYFSRAEVAKLQLRAASSHEHIAAR
LTEAVHTMLSSPLEYLPPWDPKEYSARWNEIYGNNLGALAMFCVLYPENIEARDMAKDYMERMAAQPSWL
VKDAPWDEVPLAHSLVGFATAYDFLYNYLSKTQQERFLEVIANASGYMYETSYRRGWGFQYLHNHQPTNC
MALLTGSLVLMNQGYLQEAYLWTKQVLTIMEKSLVLLREVTDGSLYEGVAYGSYTTRSLFQYMFLVQRHF
DINHFGHPWLKQHFAFMYRTILPGFQRTVAIADSNYNWFYGPESQLVFLDKFVMRNGSGNWLADQIRRNR
VMEGPGTPSKGQRWCTLHTEFLWYDASLKSVPPPDFGTPALHYFEDWGVVTYGSALPAEINRSFLSFKSG
KLGGRAIYDIVHRNKYKDWIKGWRNFNAGHEHPDQNSFTFAPNGVPFITEALYGPKYTFFNNVLMFSPAV
SKSCFSPWEGQVTEDCSSKWSKYKHDLAASCQGRVVAAVEKNGVVFIRGEGVGAYNPQLRLKNVQRNLML
LHPQLLLLVDQIHLGEDSPLETAASFFHNVDFSFEETVVDGVHGAFIRQRDGLYKMYWMDDTGYSEKGTF
ASVTYPRGYPYNGTNYVNVTTHLRSPITRAAYLFIGPSVDVQSFSIHGDSQQLDVFIATSEHAYATYLWT
GETTEQLALAQVIADRQKILFDRSSAIKSTVVPEVKDYAAIVEQNLQHFKPVFQLLEKQILSRVRNTASF
RKTAERLLRFSDKRQTEEAIDRIFAISQQQQQQQSKSKKNRRGGKRYKFVDAVPDIFAQIEVNEKKIRQK
AQILAQKELPIDEDEEMKDLLDFADVTYEKHKNGDLMKGRFGQARMVTTTRSRAPALSASYTRLFLILNI
AIFFVMLAMQLTYFQRAQSLHGQRCLYAVLLIDSCILLWLYSSCSQSQC
>176946
MRTHTRGAPSVFFIHVVCFALICSTDNNPSTVVPFVNANYDNYPMLYFSRREIQDLRYKAATTHQHIATR
LVEAVQIMLSNSLEYLPPWDPKDFSARWNEIYGNNLGALAMFCILYPDNMEAINMAKDYMERMAAQPSWL
VKDAPWDEVPLAHSLVGFATAYDFLHNYLSKSQQEKFLEVIANASGYMYEASYRRGWGFQYLHNHQPTNC
VALLVGSLVLMNQGYLQEAYLWTKQVLTIMEKSIVLLQEVTDGSLYEGVAYGSYTTRSLFQYIFLVQRHF
DINHFKHPWLKQHFAFMYRTVLPGFQRTVAIADSNYNWFYGPESQLVFLDKFVMRNGSGNWLADQIRRNR
VLEGPGTASKGQRWCTLHTEFLWYDSSLGFVPPPDYGIPKLHYFEDWGVVTYGSALPAEINRPFLSFKSG
KLGGRAIYDIVHQNKYKEWIKGWRNFNAGHEHPDQNSFTFAPNGVPFITEALYGPKYTFLNNVLMFSPAV
SKSCFYPWEGQVTEDCSSKWLKYKHDLAADCQGRIVAAIERSEIIFIRGEGVGAYNPKLKLKSVQRNLLL
VHPQLLLLVDQIYLHDDSPAKVATSFFHNVDVPFEETVIDNVHGAFIRQEDGIYKMYWMDDTGYSQKAVI
DSRMYPRGYPYNGTNYVNVTTHLRSPITRAVYLFIGPSIDVQSFSVHGNSQQLDIFVTTSEHAYTIYLWT
DENKSHSVFAQVIADHQKVVFERASAIRNSPVSGVKNNIEIVEQNLQHFKPVFQQLEKQILSRVRNTDSF
RKTAERLLRFSDKRQTEEAIDRIFAISQQQQGKAKKYKKVAKGYKFVDAGPDIFAQIEVNERKIRQKAQS
LAQKELPVDEEEEMKDLLDFADITYEKQRNSVPIKVQSGLAQILSTARSSGPLVSASYTRLFLILNIVIF
FVMLAMQLTWFQKAKSLHGQRCLYAILLIDSCILLWLYSSCSQSQC
>118797
MRTHTRGAPSVFFIYLFCFVSAYVTDEDPEVMIPFTNANYDSHPMLYFSRAEVAKLQLRAASSHQHIAAR
LTEAVHIMLSSPLEYLPPWDPKEYSARWNEIYGNNLGALAMFCVLYPENIEARDMAKDYMERMAAQPSWL
VKDAPWDEVPLAHSLVGFATAYDFLYNYLSKTQQERFLEVIANASGYMYETSYRRGWGFQYLHNHQPTNC
MALLTGSLVLMNQGYLQEAYLWTKQVLTIMEKSLVLLREVTDGSLYEGVAYGSYTTRSLFQYMVLVQRHF
DINHFGHPWLKQHFAFMYRTILPGFQRTVAIADSNYNWFYGPESQLVFLDKFVMRNGSGNWLADQIRRNR
VMEGPGTPSKGQRWCTLHTEFLWYDASLKSVPPPDFGTPALHYFEDWGVVTYGSALPAEINRSFLSFKSG
KLGGRAIYDIVHRNKYKDWIKGWRNFNAGHEHPDQNSFTFAPNGVPFITEALYGPKYTFFNNVLMFSPAV
SKSCFSPWEGQVTEDCSSKWSKYKHDLAASCQGRVVAAVEKNGVVFIRGEGVGAYNPQLHLKNVQRNLIL
LHPQLLLLVDQIHLGEDSPLETAASFFHNVDFSFEETVVDGVHGAFIRQRDGLYKMYWMDDTGYSEKGTF
ASVTYPRGYPYNGTNYVNVTTHLRSPITRAAYLFIGPSVDVQSFSIHGDSQQLDVFVATSEHAYATYLWT
GETTEQLALAQVIADHQKILFDRSSTIKTTVVPEVKDYAAIVEQNLQHFKPVFQLLEKQILSRVRNTASF
RKTAERLLRFSDKRQTEEAIDRIFAISQQQQQQQQSKSKKNRRGGKRYKFVDAVPDIFAQIEVNEKRIRQ
KAQILAQKELPIDENEEMKDLLDFADVTYEKHTNGDLMKGRFGQARMVTATRSRAPALSASYTRLFLILN
IAIFFVMLAMQLTYFQRAQSLHGQRCLYAVLLVDSCILLWLYSSCSQSQC
>9365
MRTHTRGAPSVFFIYLFCSVSAFITDKNPEVMIPFINANYDSHPMLYFSREEVAELQHRAVSSHKHIAAR
ITEAVHTMLSSPLEYLPPWDPKEYSARWNEIYGNNLGALAMFCVLYPENIEARDMAKDYMERMAAQPSWL
VKDAPWDEVPLAHSLVGFATAYDFLYNYLSKTQQEKFLEVIANASGYMYETSYRRGWGFQYLHNHQPTNC
MALLTGSLVLMNQGYLQEAYLWTKQVLTIMEKSLVLLREVSDGSLYEGVAYGSYTTRSLFQYMFLVQRHF
DINHFGHPWLKKHFAFMYRTILPGFQRTVAIADSNYNWFYGPESQLVFLDTFVMRNGSGNWLADQIRRNR
VMEGPGTPSKGQRWCTLHTEFLWYDASLKSVSPPDFGTPTLHYFEDWGVVTYGSALPAEINRSFLSFKSG
KLGGRAIYDIVHRNKYKGWIKGWRNFNAGHEHPDQNSFTFAPNGVPFITEALYGPKYTFFNNVLMFSPAV
SKSCFSPWEGQVTEDCSSKWSKYKHDLAASCQGRVVAAVEKNGVVFMRGEGVGAYNPQLKLKNVQRNLIL
LHPQLLLLVDQIHLEEDSPLESAASFFHNVDVPFEETVVDGVHGAFIQQRDGLYKMYWMDDTGYSEKGTF
ASVTYPRGYPYNGTNYVNVTTHLRSPVTRAAYLFIGPSVDVQSFNIHGDSQQLEVFIATSKHAYAAYLWT
GETTGQSAFAQVIADRQKILFDRSSAIKSTMVPEVKDYAAIVEQNLQHFKPVFQLLEKQILSRVRNTASF
RKTAERLLRFSDKRQTEEAIDRIFAISQQQQQQQQRQSKSKKSRRVGKRYKFVDAVPDIFAQIEDNEKKV
RQKAQILAQKEQPIDEDEEMNDLLDFADVTYEKHTNGLLKGGFGNGRMVTTYSRTSSLSASYTRLFLILN
IAIFLVMLAMQLTYFQRAQNLHGQRCLYAVLLVDCCILLWLYSSCSQSQC
>9258
MAPPKLGIVDRLVKDAPWDEVPLAHSLMGFATAYDFLYDSLSKMQQERFLEVIANTSGYMYETSYRRGWG
FQYLHNHQPTNCMALLVGSLVLMNQGYLQEAYLWTKQVLSIMEKSIVLLQEVTDGSLYEGVAYGSYTTRS
LFQYLFLVQRHFNIDHFGHPWLKQHFAFMYRTVLPGFQRTVAIADSNYNWFYGPESQLVFLDKFVLRNGS
GNWLAEQIRLHRVADGPGSPSKGQRWCTLHTEFLWYDASLHSVPPPDFGTPALHYFEDWGVVTYGSALPA
EARRPFLSFKSGKLGGRAIFDIVHGSKYRDWIRGWRNFNAGHEHPDQNSFTFAPNGVAFVTEALYGPKYT
FFNNAVMFAPAPAGGCFSPWEGQVTEDCSSKWSRYKHGQAADSQGRVVAAQERGGVVFIRGEGAGAYHPR
LRLKHLQRNLVLLHPQLLLLVDHIHLEEDSPLKAMAAFFHNVDVPFEPTAVDGVHGAFVRQRDGLYRMFW
MDEAGASERATLASAAYPRGYPYNGTHFVNVTTRLRGPVTRVAYLFVGPAVDVQSFNVHGDARRLDVFIA
TGQHAYAIFLWTAAEAEGQPVFAQVIADRSKISFDRASAVRPSAVPEVPDYVGVVEQNLQRFKPVFQQLE
RQILSRVQNTASFRETAARLLRFSDKRQTEEAIERIFSVTRQRHPSPSHCRKAKKSRRKGRRSRFVDAGP
DIFAQIEVNEKKIRQAAQVRAQKELPVDEDEEMKDLLDFADFPHERHLDGGFIRSQPGRPQRATLARSPA
AAASYTRLFLMLNIAIFFVMLATQLSYFQRAQSLHGQRCLYAILLADGCXLLWLYSSCSQTQC
>7868
MKTYTHGAATVIFINLFCSLLAQPVNAKSGGSIHFMNGNYDGHPMLYFGKEDVEDLRVKARGSHWHIATR
IRDAVQIMLLNPVEYLPPWDPKHFSARWNEMYGNNLGVLAIFCVLFPERTEALEFTLDYMERMASQPSWL
VKDAPWDEVPLAHSLVSFATAYDFLYDHLNKSRQERYVEVIADASRYMYEMSYSRGWGFQYLHNHQPTNC
VALLTGSLILMTQGYLQEAYLWTKQVLAILEKSMVLLQDVKDGSLYEGVAYGSYTTRSLFQYMFLVQKHF
NISHFDHPWIKQHFAFYYRTVLPGFQRTVAIADSNYNWFYGPESQLVFLDTYIMRNGSGNWLAQQIRKNR
IREGPGTPTKGQRWCTLHIEFLWYDATLTPVPPRDYGLSKLHYFEDWGVVTYGGAVPTEINRPFLSFKSG
KLGGRAIFDIVHQNKYSQWITGWKNFNAGHEHPDQNSFTFAPNGVPFITEALYGPKYTYLNNALTFSPAT
SESCFPPWEGQVTEACNSKWLKYKHGISGNSHGHIVAALEQNGVVFIRGEAVGAYSPSLKLKSSQRSLLL
LHPQLLLLVDQIHLEEDSPLQKMSAFFHNTDVGFQATSKDGIHGAFVQQKDGQYRMFWMDDQGNSEKGML
SYKVYPRGYPYNGTYYVNVTTTLRYPITRTAYIFFGPSVEIQSFTIREDLDRVDLYIATNDKTYTVYLIT
GETPMKPLFAMVLTDRQKIVFDRGSAVRTDSLKEVENYVNVVEENLQHAKPVFQQLEKHILARVFNTDNF
RKTAERLLKLSGKKKTEEAIEKLFSISRAQSKAKKTRKGKSEGDKFSNNLPDIFAQIEMNEKRERKKLVE
QLKEESDSNERNEDVREFFDFKDLPYVKPEKAINNKVARNRYVNPRATIRSTAQSLSASYTRLFLILNIA
TFFFLLALQLIRFQKAPSLHAQRFLYAILLLDCFVLLCLYSSCSQAQC
>1230840
MRTHTRGAPSVFFISLFCFVSAYITDENPEVMIPFTNANYDNHPMLYFSKAEVSELQLKATSTHEHIAAR
LTEAVHTMLSSPLEYLPPWDPKDYSARWNEIYGNNLGALAMFCVLYPENIEARDMAKDYMERMAAQPSWL
VKDAPWDEVPLAHSLVGFATAYDFLYNYLSKTQQEKFLEVIANASGYMYETSYRRGWGFQYLHNHQPTNC
MALLTGSLVLMNQGYLQEAYLWTKQVLTIMEKSLVLLREVTDGSLYEGVAYGSYTTRSLFQYMFLVQRHF
NINHFGHPWLKQHFAFMYRTILPGFQRTVAIADSNYNWFYGPESQLVFLDKFVMRNGSGNWLADRIRRNR
VMEGPGTPSKGQRWCTLHTEFLWYDASLKSVPPQDFGTPTLHYFEDWGVVTYGSALPAEINRSFLSFKSG
KLGGRAIYDIVHRNKYKDWIKGWRNFNAGHEHPDQNSFTFAPNGVPFITEALYGPKYTYFNNVLMFSPAV
SKSCFSPWEGQVTEDCSSKWSKYKHDLAANCQGKVVAAVEKNGVVFIQGESVGAYNPRLSLKNVQRNLIL
LHPQLLLLVDQIYLGEESPLETAASFFHNVDVPFEETVVDGVHGAFIRQRDGVYKMYWMDDTGYSEKATF
ASVTYPRGYPYNGTNYVNVTMHLRSPITRAAYLFIGPSVDVQSFSIHGDSQQLDVFIATSKHAYAIYLWT
GEATGQSTFAQVIADRQKILFDRSSAIKSTIVPEVKDYVAIVEQNLQHFKPVFQLLEKQILSRVRNTASF
RKTAERLLRFSDKRQTEEAIDRIFAISQQQQQQQSKSKKNRRAGKRYKFVDAVPDIFAQIEVNEKKIRQK
AQILAQKELPIDEEEEMKDLLDFADVTYEKHKNGGLVKAQFGQARMVTTTHSRASSLSASYTRLFLILNI
AIFFVMLAMHLTYFQRAQSLHGQRCLYAVLLIDSCILLWLYSSCSQSQC
>60711
MRTHTRGAPSVFFIYLLCFVSAYITDENPEVMIPFTNANYDSHPMLYFSRAEVAELQLRAASSHEHIAAR
LTEAVHTMLSSPLEYLPPWDPKDYSARWNEIYGNNLGALAMFCVLYPENIEARDMAKDYMERMAAQPSWL
VKDAPWDEVPLAHSLVGFATAYDFLYNYLSKTQQEKFLEVIANASGYMYETSYRRGWGFQYLHNHQPTNC
MALLTGSLVLMNQGYLQEAYLWTKQVLTIMEKSLILLREVTDGSLYEGVAYGSYTTRSLFQYIFLVQRHF
NINHFGHPWLKQHFAFMYRTILPGFQRTVAIADSNYNWFYGPESQLVFLDKFVMRNGSGNWLADQIRRNR
AVEGPGTPSKGQRWCTLHTEFLWYDASLKSVPPPDFGTPTLHYFEDWGVVTYGSALPAEINRSFLSFKSG
KLGGRAIYDIVHRNKYKDWIKGWRNFNAGHEHPDQNSFTFAPNGVPFITEALYGPKYTFFNNVLMFSPAV
SKSCFSPWEGQVTEDCSSKWSKYKHDLAASCQGRVVAAEEKNGVVFIRGEGVGAYNPQLNLKNVQRNLIL
LHPQLLLLVDQIHLGEESPLETAASFFHNVDVPFEETVVDGVHGAFIRQRDGLYKMYWMDDTGYSEKATF
ASVTYPRGYPYNGTNYVNVTMHLRSPITRAAYLFIGPSIDVQSFTIHGDSQQLDVFVATSKHAYATYLWT
GEATGQSAFAQVIADRHKILFDRNSAIKSSIVPEVKDYAAIVEQNLQHFKPVFQLLEKQILSRVRNTASF
RKTAERLLRFSDKRQTEEAIDRIFAISQQQQQQSKSKKNRRAGKRYKFVDAVPDIFAQIEVNEKKIRQKA
QILAQKELPIDEDEEMKDLLDFADVTYEKHKNGGLMKGRFGQARMMTTTHSRAPSLSASYTRLFLILNIA
IFFVMLAMQLTYFQRAQSLHGQRCLYAVLLIDSCILLWLYSSCSQSQC
>1868482
MRTHTRGAPSVFFISLLCFGSASITNENPEALVPFTNANYDSHPMLFFSRAEVAELQLRATGSHAHIAAR
LTEAVHTMLSSPLDYLPPWDPKDYSARWNEIYGNNLGALAMFCVLYPENIEARDMAKDYMERMAAQPSWL
VKDAPWDEVPLAHSLVGFATAYDFLYSYLSKTQQEKFLEVIANASGYMYETSYRRGWGFQYLHNHQPTNC
MALLTGSLILMNQGYLQEAYLWTKQVLTIMEKSLVLLREVTDGSLYEGVAYGSYTTRSLFQYMFLVQRHF
GINHFGHPWLKQHFAFMYRTILPGFQRTVAIADSNYNWFYGPESQLVFLDKFVMRNGSGNWLADQIRRNR
VAEGPGTPSKGQRWCTLHTEFLWYDASLKSVPPPDFGTPTLHYFEDWGVVTYGSALPAEINRSFLSFKSG
KLGGRAIYDIVHRNKYKDWIKGWRNFNAGHEHPDQNSFTFAPNGVPFITEALYGPKYTFFNNVLMFSPAV
SKSCFSPWEGQVTEDCSSKWSKYKHDLAASCQGRVVAAAEKNGLVFIRGEGVGAYNPRLNLQKVQRNLLL
LHPQLLLLVDQIHLGEDSPLETAASFFHNVDVPFEETMVDGVHGAFTRQRDGLYKMYWMDDTGYSEKATF
ASVTYPRGYPYNGTNYVNVTTHLRSPVTRVAYLFIGPSVDVQSFSTHGDAQQLDVFIATSEHAYAVYLWT
GEAVGQSAFAQVIADHQKILFDRSVAIRTAPVPEVKDYVAVVEQNLQRFKPVFQLLEKQILSRVRNTAGF
RKTAERLLRFSDKRQTEEAIDRIFAISQRQQQQRKSKKNRRASRRYKFVDTGPDIFAQIEVNEKKIRQKA
QILAQKELPIDEDEEMKDLLDFADVTYEKHKNGESMKGQLGQVRMVTAPRSRAPALSASYTRLFLVLNIA
IFFVMLAMQLTYFQRAQSLHGQRCLYAVLLVDSCVLLWLYSSCSQSQC
>29078
MVSFEDGLAALEAWRSDATMRTHTRGAPSVFFISLLCCVSAYVTDENPEVMIPFTNADYDSHPMLYFSRA
EVAELQLRATSSHEHIAARLTEAVHTMLSSPLEYLPPWDPKDFSARWNEIYGNNLGALAMFCVLYPENIE
ARDMAKDYMERMAAQPSWLVKDAPWDEVPLAHSLVGFATAYDFLYNYLSKTQQEKFLEVIANASGYMYET
SYRRGWGFQYLHNHQPTNCMALLTGSLVLMNQGYLQEAYLWTKQVLTIMEKSLVLLREVTDGSLYEGVAY
GSYTTRSLFQYMFLVQRHFDINHFGHPWLKQHFAFMYRTILPGFQRTVAIADSNYNWFYGPESQLVFLDK
FVMRNGSGNWLADQIRKNRVVEGPGTPSKGQRWCTLHTEFLWYDASLKSVPPPDFGTPTLHYFEDWGVVT
YGSALPAELNRSFLSFKSGKLGGRAIYDIVHRNKYKDWIKGWRNFNAGHEHPDQNSFTFAPNGVPFITEA
LYGPKYTFFNNVLMFSPAVSKTCFSPWEGQVTEDCSSKWSKYKHDLAASCQGRVVAAVEKDGVVFIRGEG
VGAYNPQLSLKNIQRNLILLHPQLLLLVDEVHLGEESLVETATSFFHNVDLPFEETAVDGVHGAFIRQRD
GLYKMYWMDDTGYSEKATFASVTYPRGYPYNGTNYVNVTMHLRSPVTRAAYLFIGPSVDVQSFSIHGDPQ
QLDVFIATGEHAYAVYLWTGETPGQPAFAQVIADRQEILFDRSSAVKSTAVPELKDYAAVVERNLQHFKP
VFQLLEKQILSRVRNTASFRKTAERLLRFSDKRQTEEAIDRIFAISQQQQQQQQRKSKKNRRGGKRYKFV
DAVPDIFAQIEVNEKKIRQKAQILAQKEQPVDEDEEMKDLLDFADVTYERHRNDGLMKGRLGQARMVTTT
HSKAPSLSASYTRLFLILNIVIFFVMLAMQLTYFQRAQSLHGQRCLYAVLLIDSCILLWLYSSCSQSQC
>9986
MRTHTRGAPSVFFIYLLGFVSAYITDENPEVMIPFTNANYDSHPMLYFSRAEVAELQLRAASSHEHIAAR
IIEAVHTMLSSPLEYLPPWDPKDYSARWNEIYGNNLGALAMFCVLYPENIEARDMAKDYMERMAAQPSWL
VKDAPWDEVPLAHSLVGFATAYDFLYNYLSKTQQEKFLEVIANASGYMYETSYRRGWGFQYLHNHQPTNC
MALLTGSLVLMNQGYLQEAYLWTKQVLTIMEKSLVLLREVTDGSLYEGVAYGSYTTRSLFQYMFLVQRHF
DINHFGHPWLKQHFAFMYRTILPGFQRTVAIADSNYNWFYGPESQLVFLDKFVMRNGSGNWLADQIRKNR
VVEGPGTPSKGQRWCTLHTEFLWYDASLKSVPPSDFGTPTLHYFEDWGVVTYGSSLPAEINRSFLSFKSG
KLGGRAIYDIVHRNKYKDWIKGWRNFNAGHEHPDQNSFTFAPNGVPFITEALYGPKYTFFNNVLMFSPAV
SKSCFSPWEGQVTEDCSSKWSKYKHDLAASCQGRVVAAVEKNGVVFIRGEGVGAYNPQLNLKNIQRNLIL
LHPQLLLLVDQIHLGEDSPLEMAASFFHNVDVPFEETVVDGVHGAFIRQRDGLYKMYWMDDTGYSEKATF
ASVTYPRGYPYNGTNYVNVTMHLRSPVTRAAYLFIGPSVDVQSFSIHGDAEELDVFVATSEHAYATYLWT
GETTGQSAFAQVIADHQKILFDRNSAVKSTTVPEVKDYAALVERNLQHFKPVFQLLEKQILSRVRNTAGF
RKTAERLLRFSDKRQTEEAIDRIFAISQQQQQRQSKSKKNRRAGKHYKFVDAVPDIFAQIEVNEKKIRQK
AQILAQKELPIDEDEEMKDLLDFADVTYEKHKNGDLMKSQFAQARMVTTTHSRAPSLSASYTRLFLILNI
AIFFVMLAMQLTYFQRAQSLHGQRCLYAVLLLDSCILLWLYSSCSQSQC
>144197
MRTHTRGAPTVFFISLLWPLLAPAAAADVDPGGGIPFMGGNYDGHPMLYFSRGNVEELQYAAAGTHREMA
RRIREAGEAMLEHPEEYLPPWSPAEFSARWNEVYGNNLGVLSMFCLLYPHRAGALDLAKDYMERMAAQPS
WLVKDAPWDEVPLAHSLVGFATAYDFLYEYLNKGQQERFLQVIGNASRLMYEKSYVRGWGFQYLHNHQPT
NCVALLTGSLVYMTQGYLQEAYLWTKQALSIMEKSMVLLQDVTDGSLYEGVAYGTYTTRSLFQYMFLVQR
HFAISHFDHPWLLKHFAFLYRTILPGFQRTVAIADSNYNWFYGPESQLVFLDRYVLRNGSGNWLADLIHQ
NRVMEGPGQAGKGQRWCTLHTEFIWYDPGLISKPPSDFGTSQLHYFEDWGVVTYGSALPANTNCTFLSFK
SGKLGGRAIFDIVHRNKYKEWIKGWRNFNAGHEHPDQNTFTFAPNGVPFITEALYGPKYTLLNNAVLFGS
AFSGSCFKPWAGQVTEACDSKWLKYKVGLAADAQGRVEAAMEREGMVFIRGEGHSAYNPELKIRNFQRNL
LLLHPQILLLVDHIHLDPDSPVRTMSAFFHNTELPFQSTKVDGVHGAFVSHGKDEYKMFWMDDTSYSNKG
VVGYWNYPRGYPYNGSNYVNVTMPLRYPHTRVAYIFFGPGVDVQSFSLRSDDQRVDIYLATKDHTYTIYL
LTGEITSKPLFAMVLQDHKKIVFEKAAAVVDSSPEEVEEYVNVMEDNLQHVKPVFQQMERHILGRVLNTA
SFRKTAERLLQFSDKKKTEEVIEKMFAMSKKQSKGKGGKKVNLGEKLSESMPDIFAQIEVNEKKERQRTS
KRTYEDSPEEGDADSRAFMDYTDGRKNRKGGFIKGRKFKEIHMVATAGSESLPSTASYIRLFLLLNTATF
FLLLAVLLTRFQRGRSLHTQRCFYTILLIDCFILLYLYSSCSHSQC
>244447
MRTYTRGAPTVFFISFLWLLLFLKEELTIAEVDPSGGIPFMGGNYDGHPMLYFTRGEVEELQYASSGTHQ
EMARRIREAAETMLEHPEEYLPPWSPAEFSARWNEVYGNNLGVLSMFCLLYPHRAGALDFAKDYMERMAA
QPSWLVKDAPWDEVPLAHSLVGFATAYDFLYEYLNKDQQDRFLQVIGNASRLMYEKSYVRGWGFQYLHNH
QPTNCVALLTGSLVYMTQGYLQEAYLWTKQVLSIMEKSMVLLRDVTDGSLYEGVAYGTYTTRSLFQYMFL
VQRHFSIGHFDHPWLLRHFAFLYRTILPGFQRTVAIADSNYNWFYGPESQLVFLDRYVLRNGSGNWLADV
IHQNRVVEGPGQAGKGQRWCTLHTELIWYDPSLIPKPPSDFGTSRLHHFEDWGVVTYGGALPADTNRTFI
SFKSGKLGGRAIFDIVHKNKYKEWIKGWRNFNAGHEHPDQNTFTFAPNGFPFITEALYGPKYTLLNNAVL
FGSAISGSCFQPWVGQVTEACDSKWLIYKVGLAADTQGRIEAAMERQGMIFIRGEGRSAYSPDLKIRNFQ
RNLLLLHPQLLLVVDHIHLDADSPTWAMSAFFHNTELPFQDAKADNVHGAFVSHGEDKYKMFWLDDTGYS
NKGVIGYWNYPRGYPYNGSNYVNITMPLRYPYTRVAYIFYGPGVDIKSFSLRGDDQRVDIHLDAVDHTYT
VYLLTGEVTSKPLYSMVLLDNKKVVFEKAAAAVDTSPEEVEEYVNVMEDNLQHVKPVFQQMERHILGRVL
NTASFRKTAERLLQFSDKRKTEEVIEKMFAMSRKQGKAKGGKRVNLAEKLSETLPDIFAQIEVNEKKERQ
KTSKRTYEDSPEEGDADSKAFIDYTDSRKNKKGGFVKGRKFKEVPMATVGSEGVSSTTSYIRLFLLLNTA
TFFLLLAVLLMCFQKGRSLHTQRCFYTILLIDCFILLYLYSSCSHTQC
>8081
MRTHTRGAPTVFFISLLWPLLAPVPAAEVDPAGGIPFMGGNYDSHPMLYFSRGDVEELQYAAAGTHRQMA
RRIREAGETMLEHPEEYLPPWSPTEFTARWNEVYGNNLGVLSMFCLLYPHRAGALDLAKDYMERMAAQPS
WLVKDAPWDEVPLAHSLVGFATAYDFLYEYLNKGQQEHFLQVIGNASRLMYEKSYVRGWGFQYLHNHQPT
NCVALLTGSLVYMTQGYLQEAYLWTKQVLSIMEKSMVLLQEVTDGSLYEGVAYGTYTTRSLFQYMFLVQR
HFAIGHFSHPWLLKHFAFLYRTILPGFQRTVAIADSNYNWFYGPESQLVFLDRYVLRNGSGNWLADLINQ
NRITEGPGQAGKGQRWCTLHTEFIWYDPGLIPKPPADFGTSQLHYFEDWGVVTYGGALPSGTNSSFLSFK
SGKLGGRAIFDIVHNNKYQEWIKGWRNFNAGHEHPDQNSFTFAPNGVPFITEALYGPKYTLLNNVALFGS
TLSGGCFKPWAGQVTEACDSKWLKYKVGLAADAQGRVDAAIKREGMVFIRGEGHSAYNPELKIRNFQRNL
LLLHPQLLLMVDHIHLDPGSPTRAMSAFFHNTELPFQSTKVDGVHGAFVTHGKENYKMFWMDDTNSSNKG
MVGYWSYPRGYPYNGSNYVNVTMPLRYPHTRVAYIFFGPGLDVQSFSLREHDQQVDIYLSTKDHTYTIYL
LTGEVTSKNVFAIVLLDHKKIVFERAAAVVDSFPVEVEEYANVMEDNLQHVKPVFQQMERHILGRVLNTA
SFRRTAERLLQFSDKKKTEEVIKKMFAMSKKQNKGKGGKRLNFGEKLSENLPDIFAQIEVSEKNERQRIS
KRTYEDSPEEGDADSRAFVDYPAGHRNRKGGRRFKEVHIVATARSEGVSGNPSYIRLFLLMNTTTFFLLL
AVLLTRFQRGRSLHTQRCFYTIVLIDCFILLYLYSSCSHTQC
>9244
MRTHTRGAPSVFFIHAVCFAFACGAGEDPNMMVPFVNANYDSYPMIYFSKGDVEALRLQAATTHRHIAAR
LMEAVQTMLSNPLEYLPPWDPKEFGARWNEIYGNNLGALAMFCVLYPENIEAINMAKDYMERMAAQPSWL
VKDAPWDEVPLAHSLVGFATAYDFLYGYLSKIQQERFLEVIANASGYMYETSYRRGWGFQYLHNHQPTNC
VALLAGSLVLMNQGYLQEAYLWTKQVLAIMEKSIVLLQEVTDGSLYEGVAYGSYTTRSLFQYMFLVQRHF
GINHFRHPWLKQHFAFMYRTVLPGFQRTVAIADSNYNWFYGPESQLVFLDKFVMRNGSGNWLAEQIRRNR
VVEGPGTPSKGQRWCTLHTEFLWYDASLHSVPPLDYGVPKLHYFEDWGVVTYGSALPAEINRPFLSFKSG
KLGGRAIYDIVHKNKYKEWIKGWKNFNAGHEHPDQNSFTFAPNGVPFITEALYGPKYTFFNNVLMFSPAV
SKSCFSPWEGQITEDCSSKWLKYKHDLAGDCQGRVVAAMEKSGVVFIRGEGVGAYSPKLKLRKLQRNLIL
LHPQLLLLVDQIHLEDDSPLEAATSFFHNVDVPFEETVVDDVHGAFIRHRDGIYKMYWMDDTGHSEKATI
ASRMYPRGYPYNGTNYVNVTTFLRHPLTRAIYLFIGPSVDVQSFTVRGDSPQLDVFVTTSEHAYAVYLWP
AEEGSRSAFAQVIADRQKIVFDRASAVRSSAVPEVKDYVGIVERNLQHFKPVFQQLEKQILSRVRNTDSF
RKTAERLLRFSDKRQTEEAIDRIFAISQRQQQQHGRAKKNRKVAKGYKFVDAVPDIFAQIEVNERKVRQK
AQTQAQKELPVDEDEEMKDLLDFADITYVKHKIGVSIKGRSGPVQMVTTARSSAPSISASYTRLFLILNI
AIFFVMLAMQLTYFQKAKRLHGQRCLYAILLVDSCILLWLYSSCSQSQC
>9798
MCRLVKDAPWDEVPLAHSLVGFATAYDFLYNYLSKTQQEKFLEVIANASGYMYETSYRRGWGFQYLHNHQ
PTNCMALLTGSLVLMNQGYLQEAYLWTKQVLSIMEKSLVLLREVTDGSLYEGVAYGSYTTRSLFQYMFLV
QRHFDINHFGHPWLKQHFAFMYRTILPGFQRTVAIADSNYNWFYGPESQLVFLDKFVMRNGSGNWLADQI
RRNRVMEGPGTPSKGQRWCTLHTEFLWYDASLKSVPPPDYGTPTLHYFEDWGVVTYGSALPAEIDRSFLS
FKSGKLGGRAIYDIVHRNKYKDWIKGWRNFNAGHEHPDQNSFTFAPNGVPFITEALYGPKYTFFNNVLMF
SPAVSKSCFSPWEGQVTEDCSSKWSKYKHDLAASCQGRVVAAVEKNGVVFIRGEGVGAYNPQLNLKNVQR
NLILLHPQLLLLVDQIHLGEESPLETAASFFHNVDFPFEETVVDGVHGAFIRQRDGLYKMYWMDDTGYSE
KATFASVMYPRGYPYNGTNYVNVTMHLRSPITRAAYLFIGPSVDVQSFSIHGDSQQLDVFIATSEHAYAT
YLWTGETTGQSAFAQVIADRQKILFDRSSAIKSTTVPEVKDYAAIVEQNLQHFKPVFQLLEKQILSRVRN
TASFRKTAERLLRFSDKRQTEEAIDRIFAISQQQQQKQSKSKKNRRGGKHYKFVDAVPDIFAQIEVNEKK
IRQKAQILAQKELPIDEDEEMKDLLDFADVTYEKHKNGGLMKGRVGQARMVTTTHSKAPSLSASYTRLFL
ILNIAIFFVMLAMQLTYFQRAQSLHGQRCLYAVLLIDSCILLWLYSSCSQSQC
>482537
MYETSYRRGWGFQYLHNHQPTNCMALLTGSLVLMNQGYLQEAYLWTKQVLTIMEKSLVLLREVTDGSLYE
GVAYGSYTTRSLFQYMFLIQRHFGINHFGHPWLKQHFAFMYRTILPGFQRTVAIADSNYNWFYGPESQLV
FLDKFVMRNGSGNWLADQIRRNRVVDGPGTPSKGQRWCTLHTEFLWYDASLKSIPPPDFGTPTLHYFEDW
GVVTYGSALPAEINRSFLSFKSGKLGGRAIYDIVHRNKYKDWIKGWRNFNAGHEHPDQNSFTFAPNGVPF
ITEALYGPKYTFFNNVLMFSPAVSKSCFSPWEGQVTEDCSSKWSKYKHDLAASCQGRVVAAVEKNGVVFI
RGEGVGAYNPQLNLKNVQRNLILLHPQLLLLVDQIHLGEESPLETAASFFHNVDVPFEETMVDGVHGAFI
RQRDGLYKMYWMDDTGYSEKATFASVTYPRGYPYNGTNYVNVTMHLRSPITRAVYLFIGPSVDVQSFSIH
GDSQQLDVFIATSEHAYATYLWTGETTGQSAFAQVIADRQKILFDRHSAIKSTLVPEVKDYAAIVEQNLQ
RFKPVFQLLEKQILSRVQNTASFRKTAERLLRFSDKRQTEEAIDRIFAISQQQQQQQSKSKKNRRAGKRY
KFVDAVPDIFAQIEVNEKKIRQKAQILAQKELPIDEDEEMKDLLDFADVTYEKHKNGGLMKDQSGQVRMV
TATHSRAPSLSASYTRLFLILNIAIFFVMLAMQLTYFQKAQSLHGQRCLYAVLLIDSCILLWLYSSCSQS
QC
>85066
MRTHTRGAPSVFFINAVCFAFACGAREDRDAMVPFVNANYDSYPMLYFSKGDVESLRLQASTTHQHIAAR
LIEAVQTMLSNPLEYLPPWDPKEFSARWNEIYGNNLGALAMFCVLYPENIEAINMAKDYMERMAAQPSWL
VKDAPWDEVPLAHSLVGFATAYDFLYSYLSKIQQERFLEVIANASGYMYETSYRRGWGFQYLHNHQPTNC
VALLAGSLVLMNQGYLQEAYLWTKQVLAIMEKSVVLLQEVTDGSLYEGVAYGSYTTRSLFQYMFLVQRHF
DINHFSHPWLKQHFAFMYRTVLPGFQRTVAIADSNYNWFYGPESQLVFLDKFVMRNGSGNWLAEQIRRNR
VVEGPGTPSKGQRWCTLHTEFLWYDASLRSVPPPDYGVPKLHYFEDWGVVTYGSALPAEINRPFLSFKSG
KLGGRAIYDIVHKNKYKEWIKGWRNFNAGHEHPDQNSFTFAPNGVPFITEALYGPKYTFFNNVLMFSPAV
SKSCFSPWEGQITEDCSSKWLKYKHDLAGDCQGRVVAATERSGVVFIRGEGVGAYNPKLKLRKLQRNLIL
LHPQLLLLVDQIHLEDDSPLEAATSFFHNVDVPFEETVVDDVHGAFIRHRDGIYKMYWMDDTGHSEKATI
ASRMYPRGYPYNGTNYVNVTTLLRHPLTRAIYLFIGPSVDVQSFTVRGDSPQLEVFVTTGEHAYAVYLWP
VEDGSRSTFAQVIADRQKIVFDRASAIRTSTVPEVKDYIGIVERNLQHFKPVFQQLEKQILSRVRNTASF
RKTAERLLRFSDKRQTEEAIDRIFAISQRQQQQQRGRAKKNKKVAKGYKFVDAVPDIFAQIEVNERKVRQ
KAQTQAQKELPVDEDEEMKDLLDFADITYVKHKTGLSIKGRSGLAQMVTTARSSAPSISASYTRLFLILN
IAIFFVMLAMQLTYFQKAKRLHGQRCLYAILLVDSCILLWLYSSCSQSQC
>29073
MGKKGKSEIRKLRHSKYRFAQCDADGSFEDGLAALEIWRSDATMRTHTRGAPSVFFIYLFCFVSSYITDE
NPEVMIPFTNANYDSHPMLYFSRTEVAELQLRAASSHEHIAARLTEAVHTMLSSPLEYLPPWDPKEYSAR
WNEIYGNNLGALAMFCVLYPENLEARDMAKDYMERMAAQPRYLQEAYLWTKQVLTIMEKSLVLLREVTDG
SLYEGVAYGSYTTRSLFQYMFLVQRHFDINHFGHPWLKQHFAFMYRTILPGFQRTVAIADSNYNWFYGPE
SQLVFLDKFVMRNGSGNWLADQIRRNRVTEGPGTPSKGQRWCTLHTEFLWYDASLKSVPPPDFGTPTLHY
FEDWGVVTYGSALPAEINRSFLSFKSGKLGGRAIYDIVHRNKYKDWIKGWRNFNAGHEHPDQNSFTFAPN
GVPFITEALYGPKYTFFNNVLMFSPAVSKSCFSPWEGQVTEDCSSKWSKYKHDLAASCQGRVVAAVEKNG
VVFIRGEGVGAYNPRLNLKNVQRNLLLLHPQLLLVVDQIPRGAGTPREPAASFFHNVDVPFEETAVDGVH
GAFIRQRDGLYKMYWMDDSGYSERATFASVTYPRGYPYNGTNYVNVTVRLRSPVTRTAYLFIGPSVDVQS
FSIHGDPQQLDVFVATSRHAYAAYLWTGEGTGQSALAQVIADRQKILFDRSSAIRSTSVPEVKDYAALVE
QNLQHFKPVFQLLEKQILSRVRNTASFRKTAERLLRFSDKRQTEEAIDRIFAISQQQQQQQQQSKSKKNR
RVGKRYKFVDAVPDIFAQIEVNEKKIRQKAQILAQKELPIDEDEEMKDLLDFADVTYEKHKNGGSLNGRF
GQARMMTTTHSRAPALSSSYTRLFLILNIAIFFVMLAMQLTYFQRAQSLHGQRCLYAVLLIDSCILLWLY
SSCSQSQC
>1026970
MRTHTRGAPSVFFINLLCFVSAYITDENPEVMIPFASANYDSHPMLYFSRTEVAELQLKAASSHKHIAAR
LTEAVHTMLSNRLDYLPPWDPKEYSARWNEIYGNNLGALAMYCVLYPENIEARDMARDYMERMAAQPSWL
VKDAPWDEVPLAHSLVGFATAYDFLYNYLSKIQQEKFLEVIANASGYMYETSYRRGWGFQYLHNHQPTNC
MALLTGSLVLMNQGYLQEAYLWTKQVLTIMEKSLVLLREVTDGSLYEGVAYGSYTTRSLFQYMFLVQRHF
DINHFGHPWLKQHFAFMYRTILPGFQRTVAIADSNYNWFYGPESQLVFLDKFVMRNGSGNWLADQIRKNR
VVEGPGTPSKGQRWCTLHTEFLWYDASLKSVPPPDFGTPTLHYFEDWGVVTYGSALPAEINRSFLSFKSG
KLGGRAIYDIVHRNKYKDWVKGWRNFNAGHEHPDQNSFTFAPNGVPFITEALYGPKYTFFNNVLMFSPAV
SKSCFSPWEGQVTEDCLSKWSKYKHDLAASCQGRVVAAAEKDGVVFIRGEGVGAYNPQLNLKNVQRNLIL
LHPQLLLLVDQIHLGEESPVETAASFFHNVDVPFEETVVDGVHGAFIRQRDGLYKMYWMDDTGYSEKATF
ASVTYPRGYPYNGTNYVNVTMHLRSPITRAAYLFIGPSVDVQSFSIHGDSQQLDVFIATSEHAYATYLWT
GESTGQSAFAQVIADRQKILFDRNSAIKSTTVPEVKDYVAIVERNLQHFKPVFQLLEKQILSRVRNTASF
RKTAERLLRFSDKRQTEEAIDRIFAISQQQQQQQGKSKKHRRVDKRYKFVDAGPDIFAQIEVNEKKIRQK
AQILAQKELPIDEDEEMKDLLDFADVTYEKHKNGGSVNGRFGQARMVTATHSRARSLSASYTRLFLILNI
AIFFVMLAMQLTYFQRAQSLHGQRCLYAVLLVDSCVLLWLYSSCSQSQC
>328815
MRTHTRGAPSVFFIHAVCFAFAYGAREDRDVMVPFVNANYDSYPMLYFSKGDVESLRLQATTTHQHIAAR
LIEAVQTMLSNPLEYLPPWDPKEFSARWNEIYGNNLGALAMFCVLYPENIEAINMAKDYMERMAAQPSWL
VKDAPWDEVPLAHSLVGFATAYDFLYSYLSKIQQERFLEVIANASGYMYETSYRRGWGFQYLHNHQPTNC
VALLAGSLVLMNQGYLQEAYLWTKQVLAIMEKSVVLLQEVTDGSLYEGVAYGSYTTRSLFQYMFLVQRHF
DINHFSHPWLKQHFAFMYRTVLPGFQRTVAIADSNYNWFYGPESQLVFLDKFVMRNGSGNWLAEQIRRNR
VVEGPGTPSKGQRWCTLHTEFLWYDASLRSVPPPDYGVPKLHYFEDWGVVTYGSALPAEINRPFLSFKSG
KLGGRAVYDIVHKNKYKEWIKGWRNFNAGHEHPDQNSFTFAPNGVPFITEALYGPKYTFFNNVLMFSPAV
SKSCFSPWEGQITEDCSSKWLKYKHDLAGDCQGRVVAAMERSGVVFIRGEGVGAYNPKLKLRKLQRNLIL
LHPQLLLLVDQIHLEDDSPLEAATSFFHNVDVPFEETVVDDVHGAFIRHRDGIYKMYWMDDTGHSEKATI
ASRMYPRGYPYNGTNYVNVTTLLRHPVTRAIYLFIGPSVDVQSFTVRGDSPQLDVFVTTGEHAYAVYLWP
AEDGSRSAFAQVIADRQKIVFDRASAIRSSAVPEVKDYMGIVERNLQHFKPVFQQLEKQILSRVRNTASF
RKTAERLLRFSDKRQTEEAIDRIFAISQRQQQQQRGKAKKNRKVAKGYKFVDAVPDIFAQIEVNERKVRQ
KAQTQAQKEMPVDEDEEMKDLLDFADITYVKHKTGLSIKGRSGLAQMVTTARSSAPSISASYTRLFLILN
IAIFFVMLAMQLTYFQKAKRLHGQRCLYAILLVDSCILLWLYSSCSQSQC
>57421
MRTHTRGAPSVFFIHAICFAFACGAREEPDAMVPFVNANYDSYPMLYFSRGEVEALRLQAATTHRHIAAR
LAEAVQTMLSSPLEYLPPWDPKEFSARWNEIYGNNLGALAMFCVLYPENIEAISMAKDYMERMAAQPSWL
VKDAPWDEVPLAHSLVGFATAYDFLYSYLSKTQQERFLEVIANASGYMYETSYRRGWGFQYLHNHQPTNC
VALLAGSLVLMNQGYLQEAYLWTKQVLAIMEKSVVLLQEVTDGSLYEGVAYGSYTTRSLFQYMFLVQRHF
DINHFSHPWLKQHFAFMYRTVLPGFQRTVAIADSNYNWFYGPESQLVFLDKFVMRNGSGNWLAEQIRRNR
VVEGPGTPSKGQRWCTLHTEFLWYDASLRSVPPPDYGVPKLHYFEDWGVVTYGSALPAEINRPFLSFKSG
KLGGRAIYDIVHKNKYKEWIKGWRNFNAGHEHPDQNSFTFAPNGVPFITEALYGPKYTFFNNVLMFSPAV
SKSCFSPWEGQITEDCSSKWLKYKHDSAGDCQGRVVAAMERSGVVFIRGEGVGAYNPKLKLRKLQRNLIL
LHPQLLLLVDQIHLEDDSPLEAATSFFHNVDVPFEETVVDDVHGAFIRHRDGIYKMYWMDDTGHSEKATI
ASRMYPRGYPYNGTNYVNVTTPLRRPVTRAIYLFIGPSVDVQSFTVRGDSPQLDVFVATGEHAYAVYLWP
VEDGSRSAFAQVVVDQQKIVFDRASAVRSSVVPEVKDYVGIVERNLQHFKPVFQQLEKQILSRVRNTASF
RKTAERLLRFSDKRQTEEAIDRIFAISQRQQQQHGRAKKNRKVAKGYKFVDAVPDIFAQIEVNERKVRQK
AQTQAQKELPVDEDEEMKDLLDFADITYVKHKTGVSIKGRSGLAQMVTTARSSAPSISASYTRLFLILNI
AIFFVMLAMQLTYFQKAKRLHGQRCLYAILLVDSCILLWLYSSCSQSQC
>9597
MRTHTRGAPSVFFIYLLCFVSAYITDENPEVMIPFTNANYDSHPMLYFSRAEVAELQRRAASSHEHIAAR
LTEAVHTMLSSPLEYLPPWDPKDYSARWNEIFGNNLGALAMFCVLYPENIEARDMAKDYMERMAAQPSWL
VKDAPWDEVPLAHSLVGFATAYDFLYNYLSKTQQEKFLEVIANASGYMYETSYRRGWGFQYLHNHQPTNC
MALLTGSLVLMNQGYLQEAYLWTKQVLTIMEKSLVLLREVTDGSLYEGVAYGSYTTRSLFQYMFLVQRHF
NINHFGHPWLKQHFAFMYRTILPGFQRTVAIADSNYNWFYGPESQLVFLDKFVMRNGSANWLADQIRRNR
VVEGPGTPSKGQRWCTLHTEFLWYDASLKSVPPPDFGTPTLHYFEDWGVVTYGSALPAEINRSFLSFKSG
KLGGRAIYDIVHRNKYKDWIKGWRNFNAGHEHPDQNSFTFAPNGVPFITEALYGPKYTFFNNVLMFSPAV
SKSCFSPWVGQVTEDCSSKWSKYKHDLAASCQGRVVAAEEKNGVVFIRGEGVGAYNPQLNLKNVQRNLIL
LHPQLLLLVDQIHLGEESPLETAASFFHNVDVPFEETVVDGVHGAFIRQRDGLYKMYWMDDTGYSEKATF
ASVTYPRGYPYNGTNYVNVTMHLRSPITRAAYLFIGPSIDVQSFTVHGDSQQLDVFIATSKHAYATYLWT
GEATGQSAFAQVIADRHKILFDRNSVIKSSIVPEVKDYAAIVEQNLQHFKPVFQLLEKQILSRVRNTASF
RKTAERLLRFSDKRQTEEAIDRIFAISQQQQQQSKSKKNRRAGKRYKFVDAVPDIFAQIEVNEKKIRQKA
QILAQKELPIDEDEEMKDLLDFADVTYEKHKNGGLIKGRFGQARMVTATHSRAPSLSASYTRLFLILNIA
IFFVMLAMQLTYFQRSQSLHGQRCLYAVLLIDSCILLWLYSSCSQSQC
>43455
MRTHTRGAPSVFFIHVVCFAFAYGAREDPDAMVPFVNANYDSYPMLYFSKGDMEALRLQATTTHQHIAAR
LIEAVQTMLSNPLEYLPPWDPKEFSARWNEIYGNNLGALAMFCVLYPENIEAINMAKDYMERMAAQPSWL
VKDAPWDEVPLAHSLVGFATAYDFLYSYLSKTQQERFLEVIANASGYMYETSYRRGWGFQYLHNHQPTNC
VALLAGSLVLMNQGYLQEAYLWTKQVLAIMEKSVVLLQEVTDGSLYEGVAYGSYTTRSLFQYMFLVQRHF
DINHFSHPWLKQHFAFMYRTVLPGFQRTVAIADSNYNWFYGPESQLVFLDKFVMRNGSGNWLAEQIRRNR
VVEGPGTPSKGQRWCTLHTEFLWYDASLRSVPPPDYGVPKLHYFEDWGVVTYGSALPAEINRPFLSFKSG
KLGGRAIYDIVHKNKYKEWIKGWRNFNAGHEHPDQNSFTFAPNGVPFITEALYGPKYTFFNNVLMFSPAV
SKSCFSPWEGQITEDCSSKWLKYKHDLAGDCQGRVVAAMERSGVVFIRGEGVGAYNPKLKLRKLQRNLVL
LHPQLLLLVDQIHLEDDSPLEAATSFFHNVDVPFEETVVDDVHGAFIRHRDGIYKMYWMDDTGHSEKATI
ASRMYPRGYPYNGTNYVNVTTLLRHPVTRAIYLFIGPSVDVQSFTVHGDSPQLDVFITTSEHAYAVYLWP
VEDGSRSAFAQVIADRQKIVFDRASAIRSSAVPEVKDYIGIVERNLQHFKPVFQQLEKQILSRVRNTASF
RKTAERLLRFSDKRQTEEAIDRIFAISQRQQQQRGRAKKNRKVAKGYKFVDAVPDIFAQIEVNERKVRQK
AQTQAQKELPVDEDEEMKDLLDFADITYVKHKTGVSIKGRSGLAQMVTTARSSAPSISASYTRLFLILNI
AIFFVMLAMQLTYFQKAKRLHGQRCLYAILLVDSCILLWLYSSCSQSQC
>9218
LFLSGYLQEAYLWTKQVLAIMEKSVVLLQEVTDGSLYEGVAYGSYTTRSLFQYMFLVQRHFDINHFSHPW
LKQHFAFMYRTVLPGFQRTVAIADSNYNWFYGPESQLVFLDKFVMRNGSGNWLAEQIRRNRVVEGPGTPS
KGQRWCTLHTEFLWYDASLRSVPPPDYGVPKLHYFEDWGVVTYGSALPAEINRPFLSFKSGKLGGRAIYD
IVHKNKYKEWIKGWRNFNAGHEHPDQNSFTFAPNGVPFITEALYGPKYTFLNNVLMFSPAVSKSCFSPWE
GQITEDCSSKWLKYKHDLAGDCQGRVVAAMERSGVVFIRGEGVGAYNPKLKLRKLQRNLILLHPQLLLLV
DQIHLEDDSPLEAAASFFHNVDVPFEETVVDDVHGAFIRHRDGIYKMYWMDDTGRSEKAIITSRMYPRGY
PYNGTNYVNVTTLLRHPVTRAIYLFIGPSVDVQSFTVRGDSPQLDVFVTTSEHAYAVYLWPLEDGSRSAF
AQVIADRQKIVFDRASAIRSSAVPEVKDYAGIVERNLQHFKPVFQQLEKQILSRVRNTASFRKTAERLLR
FSDKRQTEEAIDRIFAISQRQQQHGRAKKNRKVAKGYKFVDAVPDIFAQIEVNERKVRQKAQTQAQKELP
VDEDEEMKDLLDFADITYVKHKTGVSIKGRSGLAQMVTTARSSAPSISASYTRLFLILNIAIFFVMLAMQ
LTYFQKAKRLHGQRCLYAILLVDSCILLWLYSSCSQSQC
>57068
MRTHTRGAPSVFFIHVVCFAFACGAREDQDVMVPFVNANYDSYPMLYFSKGDVQTLRLQAATTHQHIAAR
LTEAVQTMLSNPLEYLPPWDPKEFSARWNEIYGNNLGALAMFCVLYPENIEATNMAKDYMERMAAQPSWL
VKDAPWDEVPLAHSLVGFATAYDFLYSYLSKTQQERFLEVIANASGYMYETSYRRGWGFQYLHNHQPTNC
VALLAGSLVLMNQGYLQEAYLWTKQVLTIMEKSVVLLQEVTDGSLYEGVAYGSYTTRSLFQYMFLVQRHF
DINHFHHPWLKQHFAFMYRTVLPGFQRTVAIADSNYNWFYGPESQLVFLDKFVMRNGSGNWLAEQIRRNR
VVEGPGTPSKGQRWCTLHTEFLWYDASLRSVPPPDYGVPKLHYFEDWGVVTYGSALPAEINRPFLSFKSG
KLGGRAIYDIVHENKYKEWIKGWRNFNAGHEHPDQNSFTFAPNGVPFITEALYGPKYTFLNNALMFSPAV
SKSCFSPWEGQITEDCSSKWLKYKHDLAGDCQGRVVAAMERSGVVFIRGEGVGAYNPKLKLRKLQRNLIL
LHPQLLLLVDQIHLEDDSPLEAATSYFHNVDVPFEETVVDDVHGAFIRHRDGIYKMYWMDDTGHSEKAII
ASRMYPRGYPYNGTNYVNVTTLLRRPVTRAIYLFIGPSVDVQSFTVRGDSPQLDVFVTTAEHAYAVYLWP
AEDGSRSAFAQVIADRQKIVFDKASAIRSSTVPEVKDYIGIVERNLQHFKPVFQQLEKQILSRVRNTASF
RKTAERLLRFSDKRQTEEAIDRIFAISQRQQQQQRGRAKKNRKVAKGYKFVDAVPDIFAQIEVNERKVRQ
KAQTQAQKELPVDEDEEMKDLLDFADITYVKHKTGVSIKGQLGLAHMSTTSRSSAPSISASYTRLFLILN
IAIFFVMLAMQLTYFQKAKRLHGQRCLYAILLVDSCILLWLYSSCSQSQC
>345573
LVKDAPWDEVPLAHSLVGFATAYDFLYNYLSKTQQEKFLEVIANASGYMYETSYRRGWGFQYLHNHQPTN
CVALLAGSLVLMNQGYLQEAYLWTKQVLAIMEKSVVLLQEVTDGSLYEGVAYGSYTTRSLFQYMFLVQRH
FGINHFSHPWLKQHFAFMYRTVLPGFQRTVAIADSNYNWFYGPESQLVFLDKFVMRNGSGNWLAEQIRRN
RVVEGPGTPSKGQRWCTLHTEFLWYDASLRSVPPPDYGVPKLHYFEDWGVVTYGSALPAEINRPFLSFKS
GKLGGRAIYDIVHKNKYKEWIKGWRNFNAGHEHPDQNSFTFAPNGVPFITEALYGPKYTFFNNVLMFSPA
VSKSCFSPWEGQITEDCSSKWLKYKHDLAGDCQGRVVAAMERSGVVFIRGEGVGAYNPKLKLRKLQRNLI
LLHPQLLLLVDQIHLEDDSPLEAATSFFHNVDVPFEETVVDDVHGAFIRHRDGIYKMYWMDDTGHSEKAT
ITSRMYPRGYPYNGTNYVNVTTLLRHPITRAIYLFIGPSVDVQSFTVRGDSPQLDVFVTTSEHAYAVYLW
PAEDGSRSAFAQVIADRQKIVFDRASAIRSSAVPEVKDYVGIVERNLQHFKPVFQQLEKQILSRVRNTAS
FRKTAERLLRFSDKRQTEEAIDRIFAISQRQQQRGRAKKNRKVAKGYKFVDAVPDIFAQIEVNERKVRQK
AQTQAQKELPVDEDEEMKDLLDFADVTYVKHKTGVSIKGRSGLAQMVTTARSSAPSISASYTRLFLILNI
AIFFVMLAMQLTYFQKAKRLHGQRCLYAILLVDSCILLWLYSSCSQSQC
>9135
MRTHTRGAPSVFFIHAVCFAFACGAREDQDTMVPFVNANYDSYPMLYFSKGDVQTLRLQASSTHQHIAAR
LIEAVQTMLSNPLEYLPPWDPKEFSARWNEIYGNNLGALAMFCVLFPENMEAINMAKDYMERMAAQPSWL
VKDAPWDEVPLAHSLVGFATAYDFLYSYLSKIQQERFLEVIANASGYMYETSYRRGWGFQYLHNHQPTNC
VALLAGSLVLMNQGYLQEAYLWTKQVLAIMEKSVVLLQEVTDGSLYEGVAYGSYTTRSLFQYMFLVQRHF
DINHFSHPWLKQHFAFMYRTVLPGFQRTVAIADSNYNWFYGPESQLVFLDKFVMRNGSGNWLAEQIRRNR
VVEGPGTPSKGQRWCTLHTEFLWYDASLRSVPPPDYGVPKLHYFEDWGVVTYGSALPAEINRPFLSFKSG
KLGGRAIYDIVHKNKYKEWIKGWRNFNAGHEHPDQNSFTFAPNGVPFITEALYGPKYTFFNNVLMFSPAV
SKSCFSPWEGQITEDCSSKWLKYKHDLAGDCQGRVVAATERSGVVFIRGEGVGAYNPKLKLRRLQRNLIL
LHPQLLLLVDQIHLEDDSPLEAATSFFHNVDVPFEETVVDDVHGAFIRHRDGIYKMYWMDDTGHSEKATI
ASRMYPRGYPYNGTNYVNVTTLLRHPVTRAIYLFIGPSVDVQSFTVRGDSPQLDVFVTTGEHAYAVYLWP
VEDGSRSAFAQVIADRQKIVFDRASAIRSSTVPEVKDYVGIVERNLQHFKPVFQQLEKQILSRVRNTASF
RKTAERLLRFSDKRQTEEAIDRIFAISQRQQQQQRGRAKKNRKVAKGYKFVDAVPDIFAQIEVNERKVRQ
KAQTQAQKELPVDEDEEMKDLLDFADITYVKHKTGVSVKGRSGLAQMVATAGSAPSISASYTRLFLILNI
AIFFVMLAMQLTYFQKAKRLHGQRCLYAILLVDSCILLWLYSSCSQSQC
>9555
MRTHTRGAPSVFFIYLLRFVSAYITDENPEVMIPFTNANYDSHPMLYFSRAEVVELQRRAASSHEHIAAR
LTEAVHTMLSSPLEYLPPWDPKDYSARWNEIYGNNLGALAMFCVLYPENIEARDMAKDYMERMAAQPSWL
VKDAPWDEVPLAHSLVGFATAYDFLYNYLSKTQQEKFLEVIANASGYMYETSYRRGWGFQYLHNHQPTNC
MALLTGSLVLMNQGYLQEAYLWTKQVLTIMEKSLILLREVTDGSLYEGVAYGSYTTRSLFQYMFLVQRHF
NINHFGHPWLKQHFAFMYRTILPGFQRTVAIADSNYNWFYGPESQLVFLDKFVMRNGSGNWLADQIRRNR
AVEGPGTPSKGQRWCTLHTEFLWYDASLKSVPPPDFGTPTLHYFEDWGVVTYGSALPAEINRSFLSFKSG
KLGGRAIYDIVHRNKYKDWIKGWRNFNAGHEHPDQNSFTFAPNGVPFITEALYGPKYTFFNNVLMFSPAV
SKSCFSPWEGQVTEDCSSKWSKYKHDLAASCQGRVVAAEEKNGVVFIRGEGVGAYNPQLNLKNVQRNLIL
LHPQLLLLVDQIHLGEESPLETAASFFHNVDVPFEETVVDGVHGAFIRQRDGLYKMYWMDDTGYSEKATF
ASVTYPRGYPYNGTNYVNVTMHLRSPITRAAYLFIGPSIDVQSFTIHGDSQQLDVFVATSKHAYATYLWT
GEATGQSAFAQVIADHHKILFDRNSAIKSSIVPEVKDYAAIVEQNLQHFKPVFQLLEKQILSRVRNTASF
RKTAERLLRFSDKRQTEEAIDRIFAISQQQQQQSKSKKNRRAGKRYKFVDAVPDIFAQIEVNEKKIRQKA
QILAQKELPIDEDEEMKDLLDFADVTYEKHKNGGLMKGRFGQARMMTTTHSRAPSLSASYTRLFLILNIA
IFFVMLAMQLTYFQRAQSLHGQRCLYAVLLIDSCILLWLYSSCSQSQC
>9233
MRTHTRGAPSVFFIHAVCFAFAYGAREDPDAMVPFVNANYDSYPMLYFSKGDVEALRLQAATTHQHIAAR
LIEAVQTMLSNPLEYLPSWDPKEFSARWNEIYGNNLGALAMFCVLYPENIEAINMAKDYMERMAAQPSWL
VKDAPWDEVPLAHSLVGFATAYDFLYSYLSKIQQERFLEVIANASGYMYETSYRRGWGFQYLHNHQPTNC
VALLAGSLVLMNQGYLQEAYLWTKQVLAIMEKSVVLLQEVTDGSLYEGVAYGSYTTRSLFQYMFLVQRHF
DINHFSHPWLKQHFAFMYRTVLPGFQRTVAIADSNYNWFYGPESQLVFLDKFVMRNGSGNWLAEQIRRNR
VVEGPGTPSKGQRWCTLHTEFLWYDASLRSVPPPDYGVPKLHYFEDWGVVTYGSALPAEINRPFLSFKSG
KLGGRAIYDIVHKNKYKEWIKGWRNFNAGHEHPDQNSFTFAPNGVPFITEALYGPKYTFFNNVLMFSPAV
SKSCFSPWEGQITEDCSSKWLKYKHDLAGDCQGRVVAAMERSGVVFIRGEGVGAYNPKLKLRKLQRNLIL
LHPQLLLLVDQIHLEDDSPLEAATSFFHNVDVPFEETVVDDVHGAFIRHRDGIYKMYWMDDTGHSEKATI
ASRMYPRGYPYNGTNYVNVTTLLRHPVTRAIYLFIGPSVDVQSFTARGDSPQLDVFVTTSEHAYAVYLWP
VEDGSRSAFAQVIADRQKIVFDRASAIRSSAVPEVKDYVGIVERNLQHFKPVFQQLEKQILSRVRNTASF
RKTAERLLRFSDKRQTEEAIDRIFAISQRQQQQHSRAKKNRKVAKGYKFVDAVPDIFAQIEVNERKVRQK
AQTQAQKELPVDEDEEMKDLLDFADITYVKHKTRVSIKGRSGLAQMATTARSSAPSISASYTRLFLILNI
AIFFVMLAMQLTYFQKAKRLHGQRCLYAILLVDSCILLWLYSSCSQSQC
>9238
MRTHTRGAPSVFFIHVVCFAFAYGAREDPDAMVPFVNANYDSYPMLYFSKGDVEALRLQAATTHQHIAAR
LIEAVQTMLSNPLEYLPSWDPKEFSARWNEIYGNNLGALAMFCVLYPENIEAINMAKDYMERMAAQPSWL
VKDAPWDEVPLAHSLVGFATAYDFLYSYLSKIQQERFLEVIANASGYMYETSYRRGWGFQYLHNHQPTNC
VALLAGSLVLMNQGYLQEAYLWTKQVLAIMEKSVVLLQEVTDGSLYEGVAYGSYTTRSLFQYMFLVQRHF
DINHFSHPWLKQHFAFMYRTVLPGFQRTVAIADSNYNWFYGPESQLVFLDKFVMRNGSGNWLAEQIRRNR
VVEGPGTPSKGQRWCTLHTEFLWYDASLRSVPPPDYGVPKLHYFEDWGVVTYGSALPAEINRPFLSFKSG
KLGGRAIYDIVHKNKYKEWIKGWRNFNAGHEHPDQNSFTFAPNGVPFITEALYGPKYTFFNNVLMFSPAV
SKSCFSPWEGQITEDCSSKWLKYKHDLAGDCQGRVVAAMERSGVVFIRGEGVGAYNPKLKLRKLQRNLIL
LHPQLLLLVDQIHLEDDSPLEAATSFFHNVDVPFEETVVDDVHGAFIRHRDGIYKMYWMDDTGHSEKATI
ASRMYPRGYPYNGTNYVNVTTLLRHPVTRAIYLFIGPSVDVQSFTARGDSPQLDVFVTTSEHAYAVYLWP
VEDGSRSAFAQVIADRQKIVFDRASAIRSSAVPEVKDYVGIVERNLQHFKPVFQQLEKQILSRVRNTASF
RKTAERLLRFSDKRQTEEAIDRIFAISQRQQQQHSRAKKNRKVAKGYKFVDAVPDIFAQIEVNERKVRQK
AQTQAQKELPVDEDEEMKDLLDFADITYVKHKTRVSIKGRSGLAQMATTARSSAPSISASYTRLFLILNI
AIFFVMLAMQLTYFQKAKRLHGQRCLYAILLVDSCILLWLYSSCSQSQC
>36300
MRTHTRGAPSVFFIHAVCFAFACGAREDPDVMVPFVNANYDSYPMLYFSKGDVEALRLQAATTHQHIAAR
LIEAVQTMLSNPLEYLPPWDPKEFSARWNEIYGNNLGALAMFCVLYPENIEAINMAKDYMERMAAQPSWL
VKDAPWDEVPLAHSLVGFATAYDFLYSYLSKTQQERFLEVIANASGYMYETSYRRGWGFQYLHNHQPTNC
VALLAGSLVLMNQGYLQEAYLWTKQVLAIMEKSVVLLQEVTDGSLYEGVAYGSYTTRSLFQYMFLVQRHF
DINHFSHPWLKQHFAFMYRTVLPGFQRTVAIADSNYNWFYGPESQLVFLDKFVMRNGSGNWLAEQIRRNR
VVEGPGTPSKGQRWCTLHTEFLWYDASLRSVPPPDYGIPKLHYFEDWGVVTYGSALPAEINRPFLSFKSG
KLGGRAIYDIVHKNKYEEWIKGWRNFNAGHEHPDQNSFTFAPNGVPFITEALYGPKYTFLNNVLMFSPAV
SKSCFSPWEGQITEDCSSKWLKYKHDLAGDCQGRVVAAMEKSGVVFIRGDGVGAYNPKLKLRKLQRNLIL
LHPQLLLLVDQIHLEDDSPLEAATSFFHNVDVPFEETVVDDVHGAFIRHRDGIYKMYWMDDTGHSKKAII
ASRMYPRGYPYNGTNYVNVTTLLRHPVTRAIYLFIGPSIDVQSFTVRGDSPQLDVFITTSEHAYTVYLWP
VEDGSRTPFAQVIADRQKIVFDRASAIRSSAVPEVKDYVGIVERNLQHFKPVFQLLEKQILSRVRNTASF
RKTAERLLRFSDKRQTEEAIDRIFAISQRQQQQHSRAKKNRKVAKGYKFVDAVPDIFAQIEVNERKVRQK
AQTQAQKELPVDEDEEMKDLLDFADITYVKHKTGVSIKGRSGLAQMVTTARSSAPSISASYTRLFLILNI
AIFFVMLAMQLTYFQKAKRLHGQRCLYAILLVDSCILLWLYSSCSQSQC
>128390
MRTHTRGAPSVFFIHVVCFAFAYSAREDPDAMVPFVNANYDSYPMLYFSKGDVEALRLQASTTHQHIAAR
LVEAVQTMLSNPLEYLPPWDPKEFSARWNEIYGNNLGALAMFCVLYPENIEAISMAKDYMERMAAQPSWL
VKDAPWDEVPLAHSLVGFATAYDFLYSYLSKTQQERFLEVIANASGYMYETSYRRGWGFQYLHNHQPTNC
VALLAGSLVLMNQGYLQEAYLWTKQVLAIMEKSVVLLQEVTDGSLYEGVAYGSYTTRSLFQYMFLVQRHF
DINHFSHPWLKQHFAFMYRTVLPGFQRTVAIADSNYNWFYGPESQLVFLDKFVMRNGSGNWLAEQIRRNR
VVEGPGTPSKGQRWCTLHTEFLWYDASLRSTPPPDYGVPKLHYFEDWGVVTYGSALPAEINRPFLSFKSG
KLGGRAIYDIVHKNKYKEWIKGWRNFNAGHEHPDQNSFTFAPNGVPFITEALYGPKYTFFNNVLMFSPAV
SKSCFSPWEGQITEDCSSKWLKYKHDLAGDCQGRVVAAMERSGVVFIRGEGVGAYNPKLKLRKLQRNLIL
LHPQLLLLVDQIHLEDDSPLEAATSFFHNVDVPFEETVVDDVHGAFIRHRDGIYKMYWMDDTGHSEKAII
ASRMYPRGYPYNGTNYVNVTTLLRHPVTRAIYIFIGPSVDVQSFTVRGDSPQLDVFVTTNEHAYAVYLWP
VEDGSRSAFAQVIADRQKIVFDRASAIRSSAVPEVKDYVGIVERNLQHFKPVFQQLEKQILSRVRNTASF
RKTAERLLRFSDKRQTEEAIDRIFAISQRQQQQHGRAKKNRKVAKGYKFVDAVPDIFAQIEVNERKVRQK
AQTQAQKELPVDEDEEMKDLLDFADITYVKHKTGVSIKGRSGLAQMVTTARSSAPSISASYTRLFLILNI
AIFFVMLAMQLTYFQKAKRLHGQRCLYAILLVDSCILLWLYSSCSQSQC
>9598
MRTHTRGAPSVFFIYLLCFVSAYITDENPEVMIPFTNANYDSHPMLYFSRAEVAELQRRAASSHEHIAAR
LTEAVHTMLSSPLEYLPPWDPKDYSARWNEIFGNNLGALAMFCVLYPENIEARDMAKDYMERMAAQPSWL
VKDAPWDEVPLAHSLVGFATAYDFLYNYLSKTQQEKFLEVIANASGYMYETSYRRGWGFQYLHNHQPTNC
MALLTGSLVLMNQGYLQEAYLWTKQVLTIMEKSLVLLREVTDGSLYEGVAYGSYTTRSLFQYMFLVQRHF
NINHFGHPWLKQHFAFMYRTILPGFQRTVAIADSNYNWFYGPESQLVFLDKFVMRNGSANWLADQIRRNR
VVEGPGTPSKGQRWCTLHTEFLWYDASLKSVPPPDFGTPTLHYFEDWGVVTYGSALPAEINRSFLSFKSG
KLGGRAIYDIVHRNKYKDWIKGWRNFNAGHEHPDQNSFTFAPNGVPFITEALYGPKYTFFNNVLMFSPAV
SKSCFSPWVGQVTEDCSSKWSKYKHDLAASCQGRVVAAEEKNGVVFIRGEGVGAYNPQLNLKNVQRNLIL
LHPQLLLLVDQIHLGEESPLETAASFFHNVDVPFEETVVDGVHGAFIRQRDGLYKMYWMDDTGYSKKATF
ASVTYPRGYPYNGTNYVNVTMHLRSPITRAAYLFIGPSIDVQSFTVHGDSQQLDVFIATSKHAYATYLWT
GEATGQSAFAQVIADHHKILFDRNSVIKSSIVPEVKDYAAIVEQNLQHFKPVFQLLEKQILSRVRNTASF
RKTAERLLRFSDKRQTEEAIDRIFAISQQQQQQSKSKKNRRAGKRYKFVDAVPDIFAQIEVNEKKIRQKA
QILAQKELPIDEDEEMKDLLDFADVTYEKHKNGGLIKGRFGQARMVTATHSRAPSLSASYTRLFLILNIA
IFFVMLAMQLTYFQRSQSLHGQRCLYAVLLIDSCILLWLYSSCSQSQC
>9209
MRTHTRGAPSVFFIHAVCFAVAYGAREDPDVMVPFVNANYDSYPMLYFSKGDVEALRLQAATTHQHIAAR
LTEAVQTMLLNPQEYLPPWDPKEFSSRWNEIYGNNLGALAMFCVLYPENIEAISMATDYMERMAAQPSWL
VKDAPWDEVPLAHSLVGFATAYDFLYSYLSKIQQERFLEVIANASGYMYETSYRRGWGFQYLHNHQPTNC
VALLAGSLVLMNQGYLQEAYLWTKQVLAIMEKSVVLLQEVTDGSLYEGVAYGSYTTRSLFQYMFLVQRHF
DINHFSHPWLKQHFAFMYRTVLPGFQRTVAIADSNYNWFYGPESQLVFLDKFVMRNGSGNWLAEQIRRNR
VVEGPGTPSKGQRWCTLHTEFLWYDASLRSVPPPDYGVPKLHYFEDWGVVTYGSALPAEINRPFLSFKSG
KLGGRAIYDIVHKNKYREWIKGWRNFNAGHEHPDQNSFTFAPNGIPFITEALYGPKYTFFNNVLMFSPAV
SKSCFSPWEGQITEDCSSKWLKYKHDLAGDCQGRVVAAMERSGVVFIRGEGVGAYNPKLKLRKLQRNLIL
LHPQLLLLVDQIHLEDDSPLEAATSFFHNVDVPFEETVIDDVHGAFIRHHDGIYKMYWMDDTGHSEKATI
ASRMYPRGYPYNGTNYVNVTTLLRHPVTRAIYLFMGPFVDVQSFTVRGDSPQLDVFVTTSEHAYTVYLWP
AEDGSRSPFAQVIADRQKIVFDRAAAIRSSAVPEVKDYVGIVERNLQHFKPVFQQLEKQILSRVRNTASF
RKTAERLLRFSDKRQTEEAIDRIFAISQRQQQQHGRAKKNRKVAKGYKFVDAVPDIFAQIEVNERKVRQK
AQTQAQKELPVDEDEEMKDLLDFADITYVKHKTGVSIKGRSGPAQMVTTARSSAPSISASYTRLFLILNI
AIFFVMLTMQLTYFQKAKRLHGQRCLYAILLVDSCILLWLYSSCSQSQC
>55661
MRTHTRGAPSVFFIHAVCFAFVYGAREDPDAMVPFVNANYDSYPMLYFSKGDVETLRLQAVTTHQHIAAR
LVEAVQTMLSNPLEYLPPWDPKEFSARWNEIYGNNLGALAMFCVLYPENIEAINMAKDYMERMAAQPSWL
VKDAPWDEVPLAHSLVGFATAYDFLYSYLSKIQQERFLEVIANASGYMYETSYRRGWGFQYLHNHQPTNC
VALLAGSLVLMNQGYLQEAYLWTKQVLAIMEKSVVLLQEVTDGSLYEGVAYGSYTTRSLFQYMFLVQRHF
DINHFSHPWLKQHFAFMYRTVLPGFQRTVAIADSNYNWFYGPESQLVFLDKFVMRNGSGNWLAEQIRRNR
VVEGPGTPSKGQRWCTLHTEFLWYDASLHSVPPPDYGVPRLHYFEDWGVVTYGSALPAEINRPFLSFKSG
KLGGRAIYDIVHKNKYKEWIRGWRNFNAGHEHPDQNSFTFAPNGVPFITEALYGPKYTFLNNVLMFSPAV
SKSCFSPWEGQITEDCSSKWLKYKHDLAGDCQGRVVAAMEKSGVVFIRGEGVGAYNPKLKLRKLQRNLIL
LHPQLLLLVDQIHLDDDSPLEAATSFFHNVDVPFEETVVDDVHGAFIRHRDGIYKMYWMDDTGHSEKATI
TSRMYPRGYPYNGTNYVNVTTILRHPVTRAIYLFIGPSVDVQSFTIQGDSPQLNVFVTTGDHAYTVYLWP
VEDGSRSAFAQVIADRQKIVFDRASAIRSSAVPEVKDYVGIVERNLQHFKPVFQQLEKQILSRVRNTASF
RKTAERLLRFSDKRQTEEAIDRIFAISQRQQRQHGRAKKNRKVAKGYKFVDAVPDIFAQIEVNERKVRQK
AQTQAQKELPVDEDEEMKDLLDFADITYVKHKTGVSIKGRSGLAQMVATARSSAPSISSSYTRLFLILNI
AIFFVMLAMQLTYFHKAKRLHGQRCLYAILLVDSCILLWLYSSCSQSQC
>30455
MRTHTRGAPSVFFIHAVCFAFAYGAREDPDTMVPFVNANYDSYPMLYFAKGDVEALRLQAATTHRHIAAR
LIEAVQTMLSNPLEYLPPWDPKEFSARWNEIYGNNLGALAMFCVLYPENIEAINMAKDYMERMAAQPSWL
VKDAPWDEVPLAHSLVGFATAYDFLFSYLSKTQQERFLEVIANASGYMYETSYRRGWGFQYLHNHQPTNC
VALLAGSLVLMNQGYLQEAYLWTKQVLAIMEKSVVLLQEVTDGSLYEGVAYGSYTTRSLFQYMFLVQRHF
DINHFSHPWLKQHFAFMYRTVLPGFQRTVAIADSNYNWFYGPESQLVFLDKFVMRNGSGNWLAEQIRRNR
VVEGPGTPSKGQRWCTLHTEFLWYDASLRSVPPPDYGVPKLHYFEDWGVVTYGSALPAEINRPFLSFKSG
KLGGRAIYDIVHKNKYKEWIKGWRNFNAGHEHPDQNSFTFAPNGVPFVTEALYGPKYTFFNNVLMFSPAV
SKSCFSPWEGQITEDCSSKWLKYKHDLAGDCQGRVVAAMERSGVVFIRGEGVGAYNPKLKLRKWQRNLIL
LHPQLLLLVDQIHLEDDSPLEAATSFFHNVDVPFEETVVDDVHGAFIRHRDGIYKMYWMDDTGHSEKATI
ASRMYPRGYPYNGTNYVNVTTLLRHPVTRAIYLFIGPSVDVQSFTVRGDSPQLDVFVTTSEHAYALYLWP
AEDGSRSAFAQVIADRQKIVFDRASAIRSSAVPEVKDYLEIVERNLQRFKPVFQQLEKQILSRVRNTASF
RKTAERLLRFSDKRQTEEAIDRIFAISQRQQQQHGRAKKNRKVAKGYKFVDAVPDIFAQIEVNERKVRQK
AQTQAQKELPVDEDEEMKDLLDFADITYVKHKTGVSIKGRSGLAQMVTTARSSAPSISASYTRLFLILNI
AIFFVMLAMQLTYFQKAKRLHGQRCLYAILLVDSCILLWLYSSCSQSQC
>441894
MRTHTRGAPSVFFIHVICVAFAYSTREDPSAMIPFVNANYDSYPMLYFSKGDVEGLRLKAATTHQHIAAH
LTEAVQTMVSNPLEYLPPWDPKEFSARWNEIYGNNLGALAMFCVLYPENIEAINMAKDYMERMAAQPSWL
VKDAPWDEVPLAHSLVGFATAYDFLYSYLSKTQQERFLEVIANASGYMYETSYRRGWGFQYLHNHQPTNC
VALLAGSLVLMNQGYLQEAYLWTKQVLAIMEKAIVLLQEVTDGSLYEGVAYGSYTTRSLFQYMFLVQRHF
DINHFGHPWLKQHFAFMYRTVLPGFQRTVAIADSNYNWFYGPESQLVFLDKFVMRNGSGNWLAEQIRRHR
VVEGPGTPSKGQRWCTLHTEFLWYDASLHSVPPPDYGVPKLHYFEDWGVVTYGSALPAEINRPFLSFKSG
KLGGRAIYDIVHKNKYKEWIKGWRNFNAGHEHPDQNSFTFAPNGVPFITEALYGPKYTFFNNVLMFSPAV
SKSCFSPWEGQITEDCSSKWLKYKHDLAGDCQGRVVAAMERSGVVFIRGEGVGAYNPKLKLRKLQRNLVL
LHPQLLLLVDQIHLEDDSPLEAATSFFHNVDVPFEETVVDEVHGAFIRHRDGIYKMYWMDDTGHSEKATI
ASRMYPRGYPYNGTNYVNVTTLLRHPITRVIYLFIGPSIDVQSFTVRGDPRQLDVFVTTGEHAYAVYLWT
VEDGPRSAFVQVVADRQKIVFDRASAIRTSAVPEVKDYVGIVERNLQHFKPVFQQLEKQILSRVRNTASF
RKTAERLLRFSDKRQTEEAIDRIFAISQRQQQQQHGRAKKNRKVAKGYKFVDAVPDIFAQIEVNERKVRQ
KAQTQAQKELPVDEEEEMKDLLDFADITYVKHKTGVSIKGRSGLAQMVTTARSSAPSISASYTRLFLILN
IAIFFVMLAMQLTYFQKAKRLHGQRCLYAILLVDSCILLWLYSSCSQSQC
>188379
MRTHTRGAPSVFFIHAVCFAFAYGAREDPDAMVPFVNANYDSYPMLYFSKGDVEALRLQATTTHQHIAAR
LVEAVQTMLSNPLEYLPPWDPKEFSARWNEIYGNNLGALAMFCVLYPENIEAISMAMDYMERMAAQPSWL
VKDAPWDEVPLAHSLVGFATAYDFLYSYLSKTQQERFLEVIANASGYMYETSYRRGWGFQYLHNHQPTNC
VALLAGSLVLMNQGYLQEAYLWTKQVLAIMEKSVVLLQEVTDGSLYEGVAYGSYTTRSLFQYMFLVQRHF
DINHFSHPWLKQHFAFMYRTVLPGFQRTVAIADSNYNWFYGPESQLVFLDKFVMRNGSGNWLAEQIRRNR
VVEGPGTPSKGQRWCTLHTEFLWYDASLRSIPPPDYGVPKLHYFEDWGVVTYGSALPAEINRPFLSFKSG
KLGGRAIYDIVHKNKYKEWIKGWRNFNAGHEHPDQNSFTFAPNGVPFITEALYGPKYTFFNNVLMFSPAV
SKSCFSPWEGQITEDCSSKWLKYKHDLAGDCQGRVVAAMERSGVVFIRGEGVGAYNPKLKLRKLQRNLIL
LHPQLLLLVDQIHLEDDSPLEAATSFFHNVDVPFEETVVDDVHGAFIRHRDGIYKMYWMDDTGHSEKATI
ASRMYPRGYPYNGTNYVNVTTLLRHPVTRAIYLFIGPSVDVQSFTVRGDSPQLDVFVTTSEHAYAVYLWP
AEDGSRSAFAQVIADRQKIVFDQASAIRSFAVPEVKDYVGIVERNLQHFKPVFQQLEKQILSRVRNTASF
RKTAERLLRFSDKRQTEEAIDRIFAISQRQQQQHGRAKKNRKAAKGYKFVDAVPDIFAQIEVNERKVRQK
AQTQAQKELPVDEDEEMKDLLDFADITYVKHKTGVSIKGRSGLAQMVTTARSSAPSISASYTRLFLILNI
AIFFVMLAMQLTYFQKAKRLHGQRCLYAILLVDSCILLWLYSSCSQSQC
>37040
MRTHTRGAPSVFFIHAVCFAFAYGAREDPDTMVPFVNANYDSYPMLYFSKGDVEALRLQAATTHQHIAAR
LSEAVQTMLSNSLEYLPPWDPKEFSARWNEIYGNNLGALAMFCVLYPENIEAINMAKDYMERMAAQPSWL
VKDAPWDEVPLAHSLVGFATAYDFLYSYLSKTQQERFLEVIANASGYMYETSYRRGWGFQYLHNHQPTNC
VALLAGSLVLMNQGYLQEAYLWTKQVLAIMEKSVVLLQEVTDGSLYEGVAYGSYTTRSLFQYMFLVQRHF
DINHFSHPWLKQHFAFMYRTVLPGFQRTVAIADSNYNWFYGPESQLVFLDKFVMRNGSGNWLAEQIRRNR
VVEGPGTPSKGQRWCTLHTEFLWYDASLRSVPPPDYGVPKLHYFEDWGVVTYGSALPAEINRPFLSFKSG
KLGGRAIYDIVHKNKYKEWIKGWRNFNAGHEHPDQNSFTFAPNGVPFITEALYGPKYTFFNNVLMFFPAV
SKSCFSPWEGQITEDCSSKWLKYKHDLAGDCQGRVVAAMERSGVVFIRGEGVGAYNPKLKLRKLQRNLIL
LHPQLLLLVDQIHLEDDSPLEAATSFFHNVDVPFEETVVDDVHGAFIRHRDGIYKMYWMDDTGHSEKATI
ASRMYPRGYPYNGTNYVNVTTLLRHPVTRAIYLFIGPSVDVQSFTVRGDSPQLDVFVTTGEHAYTVSLWP
VEDGSRSAFAQVIADRQKIVFDRASAIRNSAVPEVKDYIGIVERNLQHFKPVFQQLEKQILSRVRNTASF
RKTAERLLRFSDKRQTEEAIDRIFAISQRQQQQHSRTKKNRKVAKGYKFVDAVPDIFAQIEVNERKVRQK
AQTQAQKELPVDEDEEMKDLLDFADITYVKHKTGVSIKGRSGLAQMVTTARSSAPSISASYTRLFLILNI
AIFFVMLAMQLTYFQKAKRLHGQRCLYAILLVDSCILLWLYSSCSQSQC
>54380
MRTHTRGAPSVFFIHAVCFAFAYGAREDPDAMVPFVNANYDSYPMLYFSKGDVEALRLQATTTHRHIAAR
LIEAVQTMLSNPLEYLPPWDPKEFSARWNEIYGNNLGALAMFCVLYPENIEAINMAKDYMERMAAQPSWL
VKDAPWDEVPLAHSLVGFATAYDFLYSYLSKTQQERFLEVIANASGYMYETSYRRGWGFQYLHNHQPTNC
VALLAGSLVLMNQGYLQEAYLWTKQVLAIMEKSVVLLQEVTDGSLYEGVAYGSYTTRSLFQYVFLVQRHF
DINHFSHPWLKQHFAFMYRTVLPGFQRTVAIADSNYNWFYGPESQLVFLDKFVMRNGSGNWLAEQIRRNR
VVEGPGTPSKGQRWCTLHTEFLWYDASLRSVPPPDYGVPKLHYFEDWGVVTYGSALPAEINRPFLSFKSG
KLGGRAIYDIVHKNKYKEWIKGWRNFNAGHEHPDQNSFTFAPNGVPFITEALYGPKYTFFNNVLMFSPAV
SKSCFSPWEGQITEDCSSKWLKYKHDSAGDCQGRVVAAMERSGVVFIRGEGVGAYNPKLKLRKLQRNLIL
LHPQLLLLVDQIHLEDDSPLEAATSFFHNVDVPFEETVVDDVHGAFIRHRDGLYKMYWMDDTGHSEKATI
ASRMYPRGYPYNGTNYVNVTTLLRHPVTRAIYLFIGPSVDVQSFTVRGDSPQLDVFVTTSEHAYAVYLWP
LEDGSRSAFAQVIADRQKIVFDRTSAIRSSAVPEVKDYVGIVERNLQHFKPVFQQLEKQILSRVRNTASF
RKTAERLLRFSDKRQTEEAIDRIFAISQRQQQQRGRAKKNRKVAKGYKFVDAVPDIFAQIEVNERKVRQK
AQTQAQKELPVDEDEEMKDLLDFADITYVKHKTGVSIKGRSGLAQMVTTARSSSPSISASYTRLFLILNI
AIFFVMLAMQLTYFQKAKRLHGQRCLYAILLVDSCILLWLYSSCSQSQC
>57397
MRTHTRGAPSVFFIHAVCFAFAYGAREDPDAMVPFINANYDSYPMLYFSKGDVEILRLQAATTHQHIAAR
LMEAVQTMLSNPLEYLPPWEPKEFSARWNEIYGNNLGALAMFCVLYPENIEAINMAKDYMERMAAQPSWL
VKDAPWDEVPLAHSLVGFATAYDFLYSYLSKIQQERFLEVIANASGYMYEASYRRGWGFQYLHNHQPTNC
VALLAGSLVLMNQGYLQEAYLWTKQVLAIMEKSVVLLQEVTDGSLYEGVAYGSYTTRSLFQYMFLVQRHF
DINHFSHPWLKQHFAFMYRTVLPGFQRTVAIADSNYNWFYGPESQLVFLDKFVMRNGSGNWLAEQIRRNR
VVEGPGTPSKGQRWCTLHTEFLWYDASLRSVPPPDYGVPKLHYFEDWGVVTYGSALPAEINRPFLSFKSG
KLGGRAIYDIVHKNKYKEWIKGWRNFNAGHEHPDQNSFTFAPNGVPFITEALYGPKYTFLNNVLMFSPAV
SKSCFSPWEGQITEDCYSKWLKYKHDLAGDCQGRVVAAMERSGVVFIRGEGVGAYNPKLKLRKLQRNLIL
LHPQLLLLVDQIHLEDDSPLEAATSFFHNVDVHFEETVIDDVHGAFIRHRDGVYKMYWMDDTGRSEKATI
ASRMYPRGYPYNGTNYVNVTTFLRHPVTRAIYLFIGPSVDVQSFTVRGDSPQLDVFVTTSEHAYAVYLWP
VEDGSRSAFAQVIADRQKIVFDRASAIRSSAVPEVKDYVRIVERNLQHFKPVFQQLEKQILSRVRNTASF
RKTAERLLRFSDKRQTEEAIDRIFAISQRQQQQHGKAKKNRKVAKGYKFVDAVPDIFAQIEVNERRVRQK
AQTQAQKELPVDEDEEMKDLLDFADVTYVKHKTGVSIKGRSGLAQMGTTVRSSAPSISASYTRLFLILNI
AIFFVMLAMQLTYFQKAKRLHGQRCLYAILLVDSCILLWLYSSCSQSQC
>50402
MRTHTRGAPSVFFIHAVCFAFAYGAREDAMVPFVNANYDSYPMLYFSKGDVEALRLQAATTHRHIAARLI
EAVQTMLSNPLEYLPPWDPKEFSARWNEIYGNNLGALAMFCVLYPENMEAISMAKDYMERMAAQPSWLVK
DAPWDEVPLAHSLVGFATAYDFLYSYLSKTQQERFLEVIANASGYMYETSYRRGWGFQYLHNHQPTNCVA
LLAGSLVLMNQGYLQEAYLWTKQVLAIMEKSVVLLQEVTDGSLYEGVAYGSYTTRSLFQYMFLVQRHFDI
NHFSHPWLKQHFAFMYRTVLPGFQRTVAIADSNYNWFYGPESQLVFLDKFVMRNGSGNWLAEQIRRNRVV
EGPGTPSKGQRWCTLHTEFLWYDASLRSVPPPDYGVPKLHYFEDWGVVTYGSALPAEINRPFLSFKSGKL
GGRAIYDIVHKNKYKEWIKGWRNFNAGHEHPDQNSFTFAPNGVPFITEALYGPKYTFFNNVLMFSPAVSK
SCFSPWEGQITEDCSSKWLKYKHDLAGDCQGRVVAAMERSGVVFIRGEGVGAYSPKLKLRKLQRNLILLH
PQLLLLVDQIHLEDDSPLEAATSFFHNVDVPFEETVVDDVHGAFIRHRDGIYKMYWMDDTGHSEKATITS
RMYPRGYPYNGTNYVNVTTLLRHPITRAIYLFIGPSVDVQSFTVRGDSPQLDVFITTGEHAYAVYLWPVE
DGSRSAFAQVIADRQKIVFDRASAVRSPTVPEVKDYVGIVERNLQHFKPVFQQLEKQILSRVRNTASFRK
TAERLLRFSDKRQTEEAIDRIFAISQRQQQQHGRAKKNRKVAKGYKFVDAVPDIFAQIEVNERKVRQKAQ
TQAQKELPVDEDEEMKDLLDFADITYVKHKTGVSIKGRLGLAQMVTTARSSAPSISASYTRLFLILNIAI
FFVMLAMQLTYFQRAKRLHGQRCLYTILLVDSCILLWLYSSCSQSQC
>118200
MRTHTRGAPSVFFIQAVCFAFACGAREDPDAMVPFVNANYDSYPMLYFSRGDVETLRLQAATTHQHIAAR
LLEAVQTMVSNPLEYLPPWDPKEFSARWNEIYGNNLGALAMFCVLYPENLEALSMAKDYMERMAAQPSWL
VKDAPWDEVPLAHSLIGFATAYDFLYSYLSKTQQERFLEVIANASGYMYETSYRRGWGFQYLHNHQPTNC
VALLAGSLVLMNQGYLQEAYLWTKQVLAIMEKSVVLLQEVTDGSLYEGVAYGSYTTRSLFQYMFLVQRHF
DINHFSHPWLKQHFAFMYRTVLPGFQRTVAIADSNYNWFYGPESQLVFLDKFVMRNGSGNWLAEQIRRNR
VVEGPGTPSKGQRWCTLHTEFLWYDASLRSVPPPDYGVPKLHYFEDWGVVTYGSALPAEINRPFLSFKSG
KLGGRAIYDIVHKNKYKEWIKGWRNFNAGHEHPDQNSFTFAPNGVPFITEALYGPKYTFFNNVLMFSPAV
SKSCFSPWEGQITEDCSSKWLKYKHDLAGDCQGRVVAAVERSGVVFIRGEGVGAYNPKLKLRKLQRNLIL
LHPQLLLLVDQIHLEDDSPLEAATSFFHNVDVPFEETVVDDVHGAFIRHRDGIYKMYWMDDTGRSEKATI
ASRMYPRGYPYNGTNYVNVTTFLRRPVTRAIYLFIGPSVDVQSFTARGDSPQLDVFVTTGEHAYAVYLGP
VEDGSRSAFAQVIADRQKIVFDRASAIRSSTVPEVKDYLGIVERNLQHFKPVFQQLEKQILSRVRNTASF
RKTAERLLRFSDKRQTEEAIDRIFAISQRQQQQHSRAKKNRKVAKGYKFVDAVPDIFAQIEVNERRVRQK
AQTQAQKELPVDEDEEMKDLLDFADITYVKHKTGLSIKGRSGLAQMVTTARSSAPSISASYTRLFLVLNI
AIFFVMLAMQLTYFQKAKRLHGQRCLYAILLVDSCILLWLYSSCSQSQC
>8969
MRTHTRGAPSVFFIHAVCFAFACGAREDPDAMVPFVNANYDSYPMLYFSKGDVEVLRLQATTTHQHIAAR
LIEAVQTMLSNPLEYLPPWDPKEFSARWNEIYGNNLGALAMFCVLYPENIEAINMAKDYMERMAAQPSWL
VKDAPWDEVPLAHSLVGFATAYDFLYSYLSKTQQERFLEVIANASGYMYETSYRRGWGFQYLHNHQPTNC
VALLAGSLVLMNQGYLQEAYLWTKQVLAIMEKSVVLLQEVTDGSLYEGVAYGSYTTRSLFQYMFLVQRHF
DINHFSHPWLKQHFAFMYRTVLPGFQRTVAIADSNYNWFYGPESQLVFLDKFVMRNGSGNWLAEQIRRNR
VVEGPGTPSKGQRWCTLHTEFLWYDASLRSVPPPDYGVPKLHYFEDWGVVTYGSALPAEINRPFLSFKSG
KLGGRAIYDIVHKNKYKEWIKGWRNFNAGHEHPDQNSFTFAPNGVPFITEALYGPKYTFFNNVLMFSPAV
SKSCFSPWEGQITEDCSSKWLKYKHDLAGDCQGRVVAAMERSGVVFIRGEGVGAYNPKLKLRKLQRNLIL
LHPQLLLLVDQIHLEDDSPLEAATSFFHNVDVPFEETVVDDVHGAFIRHRDGIYKMYWMDDTGHSEKATI
ASRMYPRGYPYNGTNYVNVTTLLRHPITRAIYLFIGPSVDVQSFTVRGDSPQLDVFVTTSEHAYAVYLWL
IEDGSHSAFAQVIADRQKIVFDRASAIRSSAVPEVKDYVGIVERNLQHFKPVFQQLEKQILSRVRNTASF
RKTAERLLRFSDKRQTEEAIDRIFAISQRQQQQHGRAKKNRKVAKGYKFVDAVPDIFAQIEVNERKVRQK
AQTQAQKELPVDEDEEMKDLLDFADITYVKHKTGVSIKGRSGLAQMVTTARSSAPSISASYTRLFLILNI
AIFFVMLAMQLTYFQKAKRLHGQRCLYAILLVDSCILLWLYSSCSQSQC
>30419
MRTHTRGAPSVFFIHVVCLAFAYGAREDPDAMVPFVNANYDSYPMLYFSKGDVQALRLQASTTHQHIAAR
LIEAVQTMLSNPLEYLPPWDPKEFSARWNEIYGNNLGALAMFCVLYPENIEAINMAKDYMERMAAQPSWL
VKDAPWDEVPLAHSLVGFATAYDFLYSYLSKTQQERFLEVIANTSGYMYETSYRRGWGFQYLHNHQPTNC
VALLAGSLVLMNQGYLQEAYLWTKQVLAIMEKSVVLLQEITDGSLYEGVAYGSYTTRSLFQYMFLVQRHF
DINHFSHPWLKQHFAFMYRTVLPGFQRTVAIADSNYNWFYGPESQLVFLDKFVMRNGSGNWLAEQIRRNR
VVEGPGTPSKGQRWCTLHTEFLWYDASLRSIPPPDYGVPKLHYFEDWGVVTYGSALPAEINRPFLSFKSG
KLGGRAIYDIVHKNKYKEWIRGWRNFNAGHEHPDQNSFTFAPNGVPFITEALYGPKYTFFNNVLMFSPAV
SKSCFSPWEGQITEDCSSKWLKYKHDLAGDCQGRVVAAMERSGVVFIRGEGVGAYNPKLKLRKLQRNLIL
LHPQLLLLVDQIHLEDDSPLEAATSFFHNVDVPFEETVVDDVHGAFIRHHDGIYKMYWMDDTGHSEKATI
ASRMYPRGYPYNGTNYVNVTTLLRHPVTRAIYLFIGPSVDVQSFTIRGDSPQLDVFVTTSEHAYAVYVWP
TEDGSRPAFAQVIADRQKIVFDRASAIRNFAVPEVKDYVGIVERNLQHFKPVFQQLEKQILSRVRNTASF
RKTAERLLRFSDKRQTEEAIDRIFAISQRQQQQHGRAKKNRKVAKGYKFVDAVPDIFAQIEVNERKVRQK
AQTQAQKELPVDEDEEMKDLLDFADITYVKHKTGVSIKGRSGLAQMVTTTRSSAPSISASYTRLFLILNI
AIFFVMLAMQLTYFQKAKRLHGQRCLYAILLVDSCILLWLYSSCSQSQC
>188344
MRTHTRGAPSVFFIHVVCFAFAHSAREDPDVMVPFVNANYDSYPMLYFSKGDVEALRLQAATTHQHIAAR
LIEAVQTMLSNPLEYLPPWDPKEFSARWNEIYGNNLGALAMFCVLYPENIEAISMAKDYMERMAAQPSWL
VKDAPWDEVPLAHSLVGFATAYDFLYSYLSKIQQERFLEVIANASGYMYETSYRRGWGFQYLHNHQPTNC
VALLAGSLVLMNQGYLQEAYLWTKQVLAIMEKSVVLLQEVTDGSLYEGVAYGSYTTRSLFQYMFLVQRHF
DINHFSHPWLKQHFAFMYRTVLPGFQRTVAIADSNYNWFYGPESQLVFLDKFVMRNGSGNWLAEQIRRNR
VVEGPGTPSKGQRWCTLHTEFLWYDASLRSIPPPDYGVPKLHYFEDWGVVTYGSALPAEINRPFLSFKSG
KLGGRAIYDIVHKNKYKEWIKGWRNFNAGHEHPDQNSFTFAPNGVPFITEALYGPKYTFFNNVLMFSPAV
SKSCFSPWEGQITEDCSSKWLKYKHDLAGDCQGRVVAAMERSGVVFIRGEGVGAYNPKLKLRKLQRNLIL
LHPQLLLLVDQIHLEDDSPLEAATSFFHNVDVPFEETVVDDVHGAFIRHRDGIYKMYWMDDTGHSEKATI
ASRMYPRGYPYNGTNYVNVTTLLRHPVTRAIYLFIGPSVDVQSFTVRGDSPQLDVFITTSEHAYAVYLWP
VEDGSRSAFAQVIADRQKIVFDRASAIRSSAVQEVKDYVGIVERNLQHFKPVFQQLEKQILSRVRNTASF
RKTAERLLRFSDKRQTEEAIDRIFAISQRQQQQQHGRAKKNRKVAKGYKFVDAVPDIFAQIEVNERKVRQ
KAQTQAQKELPIDEDEEMKDLLDFADITYVKHKTGVSIKGRSGLAQMVTTARSSAPSISASYTRLFLILN
IAIFFVMLAMQLTYFQKAKRLHGQRCLYAILLVDSCILLWLYSSCSQSQC
>176057
MRTHTRGAPSVFFIHAVCFAFAYCAREDPDAMVPFVNANYDSYPMLYFSKGDMEALRLQATTTHRHIAAR
LIEAVQTMLSNPLEYLPPWDPKEFSARWNEIYGNNLGALAMFCILYPENIEAINMARDYMERMAAQPSWL
VKDAPWDEVPLAHSLVGFATAYDFLYSYLSKTQQERFLEVIANASGYMYETSYRRGWGFQYLHNHQPTNC
VALLAGSLVLMNQGYLQEAYLWTKQVLAIMEKSVVLLQEVTDGSLYEGVAYGSYTTRSLFQYMFLVQRHF
DINHFSHPWLKQHFAFMYRTVLPGFQRTVAIADSNYNWFYGPESQLVFLDKFVMRNGSGNWLAEQIRRNR
VVEGPGTASKGQRWCTLHTEFLWYDASLRSVPPPDYGIPKLHYFEDWGVVTYGSALPAEINRPFLSFKSG
KLGGRAIYDIVHKNKYKEWIKGWRNFNAGHEHPDQNSFTFAPNGVPFITEALYGPKYTFFNNVLMFSPAV
SKSCFSPWEGQITEDCSSKWLKYKHDLAGDCQGRVVAAMERSGVVFIRGEGVGAYNPKLKLRKLQRNLIL
LHPQLLLLVDQIHLEDDSPLEAATSFFHNVDVPFEETVVDDVHGAFIRQRDGMYKMYWMDDTGHSEKATI
ASRMYPRGYPYNGTNYVNVTTLLRHPITRAIYLFIGPSVDVQSFTVRGDSPQLDVFVTTSEHAYAVYLWP
VEDGSRSAFAQVIADRQKIVFDRASAIRSSAVPEVKDYIGIVERNLQHFKPVFQQLEKQILSRVRNTASF
RKTAERLLRFSDKRQTEEAIDRIFAISQRQQQQHGRAKKNRKVKVAKGYKFVDAVPDIFAQIEVNERKVR
QKAQTQAQKELPIDEDEEMKDLLDFADITYVKHKTGVSIKGRSGLAQMVTTARSSAPSISASYTRLFLIL
NIAIFFVMLAMQLTYFQKAKRLHGQRCLYAILLVDSCILLWLYSSCSQSQC
>121530
MRTHTRGAPSVFFIHAVCFAIAYGAREDSNAMVPFVNANYDSYPMLYFSKGDVEALRLQATTTHQHIATR
LIEAVQTMLSNPLEYLPPWDPREFSARWNEIYGNNLGALAMFCVLYPENIEALNMAMDYMERMAAQPSWL
VKDAPWDEVPLAHSLVGFATAYDFLYSYLSKTQQERFLEVIANASGYMYETSYRRGWGFQYLHNHQPTNC
VALLAGSLVLMNQGYLQEAYLWTKQVLAIMEKSVVLLQEVTDGSLYEGVAYGSYTTRSLFQYMFLVQRHF
DINHFSHPWLKQHFAFMYRTVLPGFQRTVAIADSNYNWFYGPESQLVFLDKFVMRNGSGNWLAEQIRRNR
VVEGPGTPSKGQRWCTLHTEFLWYDASLRSVPPPDYGVPKLHYFEDWGVVTYGSALPAEINRPFLSFKSG
KLGGRAIYDIVHKNKYKEWIKGWRNFNAGHEHPDQNSFTFAPNGVPFITEALYGPKYTFLNNVLMFSPAV
SKSCFSPWEGQITEDCSSKWLKYKHDLAGDCQGRVVAAMERSGVVFIKGEGVGAYNPKLKLRKLQRNLIL
LHPQLLLLVDQIHLEDDSPLEAATSFFHNVDVPFEATVVDDVHGAFIRHRDGIYKMYWMDDTGHSEKATI
TSRMYPRGYPYNGTNYVNVTTVLRHPITRAIYLFIGPSVDVQSFTVRGDSPQLDVFVTTSEHAYAVYLWP
AEDGSRSAFAQVIADRQKIVFDRASAVRSSAVPEVKDYVGIVERNLQHFKPVFQQLEKQILSRVRNTASF
RKTAERLLRFSDKRQTEEAIDRIFAISQRQQQQHGRAKKNRKVAKGYKFVDAVPDIFAQIEVNERKVRQK
AQTQAQKELPVDEDEEMKDLLDFADITYVKHKTGVSIKGRSGLAQMVTTARSSAPSISASYTRLFLILNI
AIFFVMLAMQLTYFQKAKRLHGQRCLYAILLVDSCILLWLYSSCSQSQC
>8897
MRTHTRGAPSVFFIHAVCFAFACGAREDPDAMVPFVNANYDGYPMIYFSKGDVEALRLQATTTHRHIVAR
LAEAVQTMLSNPLEYLPPWDPKEFSARWNEIYGNNLGALAMFCVLYPENIEALSMAKDYMERMAAQPSWL
VKDAPWDEVPLAHSLVGFATAYDFLYSYLSKTQQERFLEVIANASGYMYETSYRRGWGFQYLHNHQPTNC
VALLAGSLVLMNQGYLQEAYLWTKQVLAIMEKSVVLLQEVTDGSLYEGVAYGSYTTRSLFQYMFLVQRHF
DINHFSHPWLKQHFAFMYRTVLPGFQRTVAIADSNYNWFYGPESQLVFLDKFVMRNGSGNWLAEQIRRNR
VVEGPGTPSKGQRWCTLHTEFLWYDASLRSVPPPDYGVPKLHYFEDWGVVTYGSALPAEINRPFLSFKSG
KLGGRAIYDIVHKNKYKEWIKGWRNFNAGHEHPDQNSFTFAPNGVPFITEALYGPKYTFFNNALMFSPAV
SKSCFSPWEGQITEDCSSKWLKYKHDLAGDCQGRVVAAMERSGVVFIRGEGVGAYNPKLKLRRLQRNLLL
LHPQLLLLVDQIYLEDDSPLEAVTGFFHNVDVPFEETVVDDVHGAFIRHRDGIYKMYWMDDTGRSEKATI
TSRMYPRGYPYNGTNYVNVTTLLRRPLTRAIYLFIGPSIDVQSFTVRGDSPQLDVFVTTSEHAYAVYLWP
PEDGSRSAFAQVIADRQKIVFDRASAIRSSTVPEVKDYAGIVERNLQHFKPVFQQLEKQILSRVRNTASF
RKTAERLLRFSDKRQTEEAIDRIFAISQRQQQQHSKAKKNRKVAKGYKFVDAVPDIFAQIEVNERKVRQK
AQTQAQKEMPVDEDEEMKDLLDFADITYVKHKTGVSIKGRSGLVQMVTTARSSAPSISASYTRLFLILNI
AIFFVMLAMQLTYFQKAKRLHGQRCLYAILLVDSCILLWLYSSCSQSQC
>56313
MRTHTRGAPSVFFIHVVCFAFAYGAREDPDSMVPFVNANYDSYPMLYFSKGDVEALRLQATTTHQHIAAR
LMEAVQTMLSNPLDYLPPWDPKEFSARWNEIYGNNLGALAMFCVLYPENIEAINMAKDYMERMAAQPSWL
VKDAPWDEVPLAHSLVGFATAYDFLYSYLSKTQQERFLEVIANASGYMYETSYRRGWGFQYLHNHQPTNC
VALLAGSLVLMNQGYLQEAYLWTKQVLAIMEKSVVLLQEVTDGSLYEGVAYGSYTTRSLFQYVFLVQRHF
DINHFSHPWLKQHFAFMYRTVLPGFQRTVAIADSNYNWFYGPESQLVFLDKFVMRNGSGNWLAEQIRRNR
VVEGPGTPSKGQRWCTLHTEFLWYDASLHSVPPPDYGVPKLHYFEDWGVVTYGSALPAEINRPFLSFKSG
KLGGRAIYDIVHKNKYREWIKGWRNFNAGHEHPDQNSFTFAPNGVPFITEALYGPKYTFFNNVLMFSPAV
SKSCFSPWEGQITEDCSSKWLKYKHDLAGDCQGRVVAAMERSGVVFIRGEGVGAYNPKLKLRKLQRNLIL
LHPQLLLLVDQIHLEDDSPLEAATSFFHNVDVPFEETVVDDVHGAFIRHRDGIYKMYGVADTGHSEKATI
ASRMYPRGYPYNGTNYVNVTTFLRHPITRAIYLFIGPSIDVQSFTVRGDSPQLDVFVTTSEHAYTVYLWP
AEEGSRSVFAQVIADRQKIVFDRASAVRSSAVPEVKDYVGIVERNLQHFKPVFQQLEKQILSRVRNTASF
RKTAERLLRFSDKRQTEEAIDRIFAISQRQQQQQHSKAKKNRKVAKGYKFVDAVPDIFAQIEVNERKVRQ
KAQTQAQKELPVDEDEEMKDLLDFADITYVKHKTGVSIKGRSGPVQMMTTARSSAPSISASYTRLFLILN
IAIFFVMLAMQLTYFQKAKRLHGQRCLYAILLVDSCILLWLYSSCSQSQC
>175836
YDASLRSVPPPDYGVPKLHYFEDWGVVTYGSALPAEINRPFLSFKSGKLGGRAIYDIVHKNKYREWIRGW
RNFNAGHEHPDQNSFTFAPNGVPFITEALYGPKYTFFNNVLMFSPAVSKSCFSPWEGQITEDCSSKWLKY
KHDLAGDCQGRVVAAMERSGIVFIKGEGVGAYNPKLKLRKFQRNLILLHPQLLLLVDQIHLEDDSPLEAA
TSFFHNVDVPFEETVVDDVHGAFIRHRDGIYKMYWMDDTGHSEKATIASRMYPRGYPYNGTNYVNVTTLL
RHPFTRAIYLFIGPSVDVQSFTVRGDSPQLDVFITTGEHAYAVYLWPVEDGSRFAFAQVIADRQKIVFDR
ASAVRSSTVSEVKDYVGIVERNLQHFKPVFQQLEKQILSRVRNTASFRKTAERLLRFSDKRQTEEAIDRI
FAISQRQQQQQHGRAKKSRKIAKGYKFVDAVPDIFAQIEVNERKVRQKAQTQAQKELPVDEDEEMKDLLD
FADITYVKHKAGVSIKGRSGLAQMVTTARSSAPSISASYTRLFLILNIAIFFVMLAMQLTYFQKAKRLHG
QRCLYAILLVDSCILLWLYSSCSQSQC
>54383
MRTHTRGAPSVFFIHAVCFAFACGARKDTDTMVPFVNANYDSYPMLYFSKGDVEALRLQATTTHQHIAAR
LIEAVQTMLSNPLEYLPPWEPKEFSARWNEIYGNNLGALAMFCVLYPENIEAINMAKDYMERMAAQPSWL
VKDAPWDEVPLAHSLVGFATAYDFLYSYLSKTQQERFLEVIANASGYMYETSYRRGWGFQYLHNHQPTNC
VALLAGSLVLMNQGYLQEAYLWTKQVLAIMEKSVVLLQEVTDGSLYEGVAYGSYTTRSLFQYMFLVQRHF
DINHFSHPWLKQHFAFMYRTVLPGFQRTVAIADSNYNWFYGPESQLVFLDKFVMRNGSGNWLAEQIRRNR
VVEGPGTPSKGQRWCTLHTEFLWYDATLRSVPPPDYGVPKLHYFEDWGVVTYGSALPAEINRPFLSFKSG
KLGGRAIYDIVHKNKYKEWIKGWRNFNAGHEHPDQNSFTFAPNGVPFITEALYGPKYTFFNNVLMFSPAV
SKSCFSPWEGQITEDCSSKWLKYKHDLAGDCQGRVVAAMERSGVVFIRGEGMGAYNPKLKLKKLQRNLIL
LHPQLLLLVDQIHLEDDSPLEAATSFFHNVDVPFEETVVDDVHGAFLRHRDGIYKMYWMDDTGHSEKATI
TSRMYPRGYPYNGTNYVNVTTLLRHPVTRAIYLFIGPSVDVQSFTVRGDSPQLDVFVTTGEHAYAVYLWP
VEDGSRSAFAQVIADRQKIVFDRTSAIRSSAVPEVKDYVGIVERNLQRFKPVFQQLEKQILSRVRNTASF
RKTAERLLRFSDKRQTEEAIDRIFAISQRQQQQHGRAKKNRKVAKGYKFVDAVPDIFAQIEVNERKVRQK
AQTQAQKELPVDEDEEMKDLLDFADITYVKHKSGVSIKGRSGLAQMVTTARSSAPSISASYTRLFLILNI
AIFFVMLAMQLTYFQKAKRLHGQRCLYAILLVDSCILLWLYSSCSQSQC
>279965
MRTHTRGAPSVFFIQVVCFAFAYGTREDPDAMVPFVNANYDSYPMLYFSKGDVETLRLQATTTHQHIAAR
LIEAVQTMLSNPLEYLPPWDPKEFSARWNEIYGNNLGALAMFCVLYPENIEAISMAKDYMERMAAQPSWL
VKDAPWDEVPLAHSLVGFATAYDFLYSYLSKIQQERFLEVIANASGYMYETSYRRGWGFQYLHNHQPTNC
VALLAGSLVLMNQGYLQEAYLWTKQVLAIMEKSVVLLQEVTDGSLYEGVAYGSYTTRSLFQYMFLVQRHF
GINHFSHPWLKQHFAFMYRTVLPGFQRTVAIADSNYNWFYGPESQLVFLDKFVMRNGSGNWLAEQIRRNR
VVEGPGTPSKGQRWCTLHTEFLWYDASLHSVPPPDYGVPKLHYFEDWGVVTYGSALPAEINRPFLSFKSG
KLGGRAIYDIVHKNKYKEWIRGWRNFNAGHEHPDQNSFTFAPNGVPFITEALYGPKYTFFNNVLMFSPAV
SKSCFSPWEGQITEDCSSKWLKYKHDLAGDCQGRVVAAMERSGVVFIRGEGVGAYNPKLKLRKLQRNLIL
LHPQLLLLVDQIHLEDDSPLEAATSFFHNVDVPFEETVVDDVHGAFIRHRDGIYKMYWMDDTGHSEKATI
ASRMYPRGYPYNGTNYVNVTTLLRHPVTRAIYLFIGPSVDVQSFTVRGDSPQLDVFVTTSEHAYAVYVWP
VEDGSRSVFAQVIADRQKIVFDRASAIRSSAVPEVKDYVGIVERNLQHFKPVFQQLEKQILSRVRNTASF
RKTAERLLRFSDKRQTEEAIDRIFAISQRQQQQHGRAKKNRKVAKGYKFVDAVPDIFAQIEVNERKVRQK
AQTQAQKELPVDEDEEMKDLLDFADITYVKHKTGVSIKGRSGLAQMVTTARSSAPSISASYTRLFLILNI
AIFFVMLAMQLTYFQKAKRLHGQRCLYAILLVDSCILLWLYSSCSQSQC
>240206
MRTHTRGAPSVFFIHMVYFAFAYGAREDPDAMVPFVNANYDSYPMLYFSKGDMEVLRLQATTTHQHIAAR
LIEAVQTMLSNPLEYLPPWDPKEFSARWNEIYGNNLGALAMFCVLYPENIEAISMAKDYMERMAAQPSWL
VKDAPWDEVPLAHSLVGFATAYDFLYSYLSKTQQERFLEVIANASGYMYETSYRRGWGFQYLHNHQPTNC
VALLAGSLVLMNQGYLQEAYLWTKQVLAIMEKSVVLLQEVTDGSLYEGVAYGSYTTRSLFQYMFLVQRHF
DINHFSHPWLKQHFAFMYRTVLPGFQRTVAIADSNYNWFYGPESQLVFLDKFVMRNGSGNWLAEQIRKNR
VVEGPGTPSKGQRWCTLHTEFLWYDASLRSTPPPDYGVPKLHYFEDWGVVTYGSALPAEINRPFLSFKSG
KLGGRAIYDIVHKNKYKEWIKGWRNFNAGHEHPDQNSFTFAPNGVPFITEALYGPKYTFFNNVLMFSPAV
SKSCFSPWEGQITEDCSSKWLKYKHDLAGDCQGRVVAAMERSGVVFIRGEGVGAYNPKLKLRKLQRNLIL
LHPQLLLLVDQIHLEDDSPLEAATSFFHNVDMPFEETVIDDVHGAFIRHRDGIYKMYWMDDTGHSEKATI
ASRMYPRGYPYNGTNYVNVTTLLRHPVTRAIYLFIGPSVDVQSFTVRGDSPQLDVFVTTSEHAYAVYLWP
VDDGSRSAFAQVIADRQKIVFDRASAVRSSAVPEVKDYIGIVERNLQHFKPVFQQLEKQILSRVRNTASF
RKTAERLLRFSDKRQTEEAIDRIFAISQRQQQQHGRAKKNRKVAKGYKFVDAVPDIFAQIEVNERKVRQK
AQTQAQKELPVDEDEEMKDLLDFADITYVKHKTGVSIKGRSGLAQMVTTARSSAPSISASYTRLFLILNI
AIFFVMLAMQLTYFQKAKRLHGQRCLYAILLVDSCILLWLYSSCSQSQC
>54374
MRTHTRGAPSVFFIHALCFAFAYGAREDLDTMVPFVNANYDSYPMLYFSKGDVETLRLQAATTHQHIAAR
LIEAVQTMLSNPLEYLPPWDPKEFSARWNEIYGNNLGALAMFCVLYPDNIEAIGMARDYMERMAAQPSWL
VKDAPWDEVPLAHSLVGFATAYDFLYSYLSKTQQERFLEVIANASGYMYETSYRRGWGFQYLHNHQPTNC
VALLAGSLVLMNQGYLQEAYLWTKQVLAIMEKSVVLLQEVTDGSLYEGVAYGSYTTRSLFQYMFLVQRHF
GINHFSHPWLKQHFAFMYRTVLPGFQRTVAIADSNYNWFYGPESQLVFLDKFVMRNGSGNWLAEQIRRNR
VVEGPGTPSKGQRWCTLHTEFLWYDASLHSVPPPDYGVPKLHYFEDWGVVTYGSALPAEINRPFLSFKSG
KLGGRAIYDIVHKNKYKEWIKGWRNFNAGHEHPDQNSFTFAPNGVPFITEALYGPKYTFFNNVLMFSPAV
SKSCFSPWEGQITEDCSSKWLKYKHDLAGDCQGRVVAALEKSGVVFIKGEGMGAYNPKLKLRKLQRNLIL
LHPQLLLLVDQIHLEDDSPLEAATSFFHNVDVPFEETVVDDVHGAFIRHRDGIYKMYWMDDTGHSEKATI
ASRMYPRGYPYNGTNYVNVTTLLRHPVTRAIYLFIGPSVDVQSFTVRGDSPQLDVFVTTGEHAYAVYLWP
VEDGSRSAFAQVIADRQKIVFDRASAIRSSAVPEVKDYIGIVERNLQHFKPVFQQLEKQILSRVRNTASF
RKTAERLLRFSDKRQTEEAIDRIFAISQRQQQQQHARAKKNRKVAKGYKFVDAVPDIFAQIEVNERKVRQ
KAQTQAQKELPVDEDEEMKDLLDFADITYVKHKTGVSIKGRSGLAQMVTTARSSAPSISASYTRLFLILN
IAIFFVMLAMQLTYFQKAKRLHGQRCLYAILLVDSCILLWLYSSCSQSQC
>187382
MRTHTRGAPSVFFIHAVCFAFAYSAREDPDVMVPFVNANYDSYPMLYFSKGDVEILRLQATTTHQHIAAR
LTEAVQTMLSYPLEYLPPWDPKEFSARWNEIYGNNLGALAMFCVLYPENIEAINMAKDYMERMAAQPSWL
VKDAPWDEVPLAHSLVGFATAYDFLYSYLSKTQQERFLEVIANASGYMYETSYRRGWGFQYLHNHQPTNC
VALLAGSLVLMNQGYLQEAYLWTKQVLAIMEKSVVLLQEVTDGSLYEGVAYGSYTTRSLFQYMFLVQRHF
GINHFSHPWLKQHFAFMYRTVLPGFQRTVAIADSNYNWFYGPESQLVFLDKFVMRNGSGNWLAEQIRRNR
VVEGPGTPSKGQRWCTLHTEFLWYDASLRSVPPLDYGVPKLHYFEDWGVVTYGSALPAEINRPFLSFKSG
KLGGRAIYDIVHKNKYKEWIKGWRNFNAGHEHPDQNSFTFAPNGVPFITEALYGPKYTFFNNVLMFSPAV
SKSCFSPWEGQITEDCSSKWLKYKHDLAGDCQGRVVAAMERNGVVFIRGEGVGAYNPKLKLRKLQRNLIL
LHPQLLLLVDQIHLEDDSLLEAATSFFHNVDVPFEETVVDDVHGAFIRHRDGIYKMYWMDDTGHSEKATI
ASRLYPRGYPYNGTNYVNVTTLLRHPVTRAIYLFIGPSVDVQSFTVRGDSPQLDVFVTTNEHAYAVYLWP
VEDGSRSAFAQVIADRQKIVFDRASAIRSSSVPEVKDYVGIVERNLQHFKPVFQQLEKQILSRVRNTASF
RKTAERLLRFSDKRQTEEAIDRIFAISQRQQQQHGRAKKNRKVAKGYKFVDAVPDIFAQIEVNERKVRQK
AQTQAQKELPVDEDEEMKDLLDFADITYVKHKTGVSIKGRSGLAQMVTTARSSAPSISASYTRLFLILNI
AIFFVMLAMQLTYFQKAKRLHGQRCLYAILLVDSCILLWLYSSCSQSQC
>57412
MRTHTRGAPSVFFIHAVCFAFAYNAREDRDAMVPFVNANYDSYPMLYFSKGDVEALRLQATTTHQHIAAR
LTEAVQTMLSNPLEYLPPWDPKEFSARWNEIYGNNLGALAMFCVLYPENIEAISMAKDYMERMAAQPSWL
VKDAPWDEVPLAHSLVGFATAYDFLYSYLSKTQQERFLEVIANASGYMYETSYRRGWGFQYLHNHQPTNC
VALLAGSLVLMNQGYLQEAYLWTKQVLAIMEKSVVLLQEVTDGSLYEGVAYGSYTTRSLFQYMFLVQRHF
DINHFSHPWLKQHFAFMYRTVLPGFQRTVAIADSNYNWFYGPESQLVFLDKFVMRNGSGNWLAEQIRRNR
VVEGPGTPSKGQRWCTLHTEFLWYDASLRSVPPPDYGVPKLHYFEDWGVVTYGSALPAEINRPFLSFKSG
KLGGRAIYDIVHKNKYKEWIKGWRNFNAGHEHPDQNSFTFAPNGVPFITEALYGPKYTFLNNVLMFSPAV
SKSCFSPWEGQITEDCSSKWLKYKHDLAGDCQGRVVAAMERSGVVFIRGEGVGAYNPKLKLRKLQRNLIL
LHPQLLLLVDQIHLEDDSPLEAATSFFHNVDLPFEETVVDDIHGAFIRHRDGIYKMYWMDDTGHSERATV
ASRMYPRGYPYNGTNYVNVTTLLRHPVTRAIYLFIGPSVDVQSFTVRGDSPQLEVLVATAEHSYATCLWP
TEDGSRSTFAQVVADRQKIVFDRASAVKNPTVPEVKDYIGIVERNLQRFKPVFQQLEKQILSRVRNTAGF
RKMAERLLRFSDKRQTEEAIDRIFAISQRQQQQQHDRAKKNRKIAKGYKFVDAVPDIFAQIEVNERKVRQ
KAQTQAQKELPVDEDKEMEDLLDFADITYVKHRAGVSIKGRSGLAQMVTTARSSASSISASYTRLFLILN
IAIFFVMLAMQLTYFQKAKRLHGQRCLYAILLVDSCILLWLYSACSQSQC
>94827
MRTHTRGAPSVFFIPVICLSLAYGTREDPATMVPFVNANYDSYPMLYFSKGDVEGLRLKAATTHQHIAAR
LTEAVQTMLSNPLEYLPPWDPKEFSARWNEIYGNNLGALAMFCLLYPENIEAISMAKDYMERMAAQPSWL
VKDAPWDEVPLAHSLVGFATAYDFLYSYLSKTQQERFLEVIANASGYMYETSYRRGWGFQYLHNHQPTNC
VALLAGSLILMNQGYLQEAYLWTKQVLAIMEKSVVLLQEVTDGSLYEGVAYGSYTTRSLFQYMFFVQRHF
DINHFSHPWLKQHFAFMYRTVLPGFQRTVAIADSNYNWFYGPESQLVFLDKFVMRNGSGNWLAEQIRRNR
VVEGPGTPSKGQRWCTLHTEFLWYDASLHSVPPPDYGVPKLHYFEDWGVVTYGSALPAEINRPFLSFKSG
KLGGRAIYDIVHKNKYKEWIKGWRNFNAGHEHPDQNSFTFAPNGVPFITEALYGPKYTFFNNVLMFSPAV
SKSCFSPWEGQITEDCSSKWLKYKHDLAGDCQGRVVAAVERSGVVFIRGEGVGAYNPKLKLRKLQRNLVL
LHPQLLLLVDQIHLDDDSPLEAATSFFHNVDVPFEETVVDEVHGAFIRHRDGIYKMYWMDDTGHSEKAII
ASRMYPRGYPYNGTNYVNVTTLLRHPFTRAIYIFIGPSVDVQSFTVHGDSQQLDIFVTTSEHAYAVYLWT
VEDGPRAALAQVIADRQKIIFDRASAIRTSTVPEVKDYVGIVERNLQHFKPVFQQLEKQILSRVRNTASF
RKTAERLLRFSDKRQTEEAIDRIFAISQRQQQQQRGRAKKNRKVAKGYKFVDAVPDIFAQIEVNERKVRQ
KAQTQAQKELPIDEDEEMKDLLDFADITYVKHKTGVSIKGRSGLAQMVTTARSSAPSISASYTRLFLILN
IAIFFVMLAMQLTYFQKAKRLHGQRCLYAILLVDSCILLWLYSSCSQSQC
>97097
MRTHTRGAPSVFFIHAVCFAFAYGAREDPDAMVPFVNANYDSYPMLYFSKGDVEALRLQAATTHQHIAAR
LVEAVQTMLSNPLEYLPPWDPKEFSARWNEIYGNNLGALAMFCVLYPENIEAISMAKDYMERMAAQPSWL
VKDAPWDEVPLAHSLVGFATAYDFLYSYLSKTQQERFLEVIANASGYMYETSYRRGWGFQYLHNHQPTNC
VALLAGSLVLMNQGYLQEAYLWTKQVLAIMEKSVVLLQEVTDGSLYEGVAYGSYTTRSLFQYMFLVQRHF
DINHFSHPWLRQHFAFMYRTVLPGFQRTVAIADSNYNWFYGPESQLVFLDKFVMRNGSGNWLAEQIRRNR
VVEGPGTPSKGQRWCTLHTEFLWYDASLRSIPPLDYGVPKLHYFEDWGVVTYGSALPAEINRPFLSFKSG
KLGGRAIYDIVHKNKYKEWIKGWRNFNAGHEHPDQNSFTFAPNGVPFITEALYGPKYTFFNNVLMFSPAV
SKSCFSPWEGQVTEDCSSKWLKYKHDLAGDCQGRVVAAMEKSGVVFIRGEGVGAYNPKLKLRKLQRNLLL
LHPQLLLLVDQIHLEDDSPLEAATSFFHNVDVPFEETVVDDVHGAFIRHRDGIYKMYWMDDTGHSEKATI
ASRMYPRGYPYNGTNYVNVTTLLRHPVTRAIYLFIGPSVDVQSFTVRGDSPQLDVFVTTSEHAYAVYLWP
VEDGSRSAFAQVIADRQKIVFDRASAIRSSAVPEVKDYVGIVERNLQHFKPVFQQLEKQILSRVRNTASF
RKTAERLLRFSDKRQTEEAIDRIFAISQRQQQHGRAKKNRKVAKGYKFVDAVPDIFAQIEVNERKVRQKA
QTQAQKELPVDEEEEMEDLLDFADITYVKHKTGVSIKGRSGLAQMVTTARSSAPSISASYTRLFLILNIA
IFFVMLAMQLTYFQKAKRLHGQRCLYAILLVDSCILLWLYSSCSQSQC
>100784
MRTHTRGAPSVFFIHAVCFAFAYSAREDPDAMVPFVNANYDSYPMLYFSKGDMEALRLQATTTHQHIAAR
LIEAVQTMLSNPLEYLPPWDPKEFSARWNEIYGNNLGALAMFCVLYPENIEAISMATDYMERMAAQPSWL
VKDAPWDEVPLAHSLVGFATAYDFLYSYLSKTQQERFLEVIANASGYMYETSYRRGWGFQYLHNHQPTNC
VALLAGSLVLMNQGYLQEAYLWTKQVLAIMEKSVVLLQEVTDGSLYEGVAYGSYTTRSLFQYMFLVQRHF
DINHFNHPWLKQHFAFLYRTVLPGFQRTVAIADSNYNWFYGPESQLVFLDKFVMRNGSGNWLAEQIRRNR
VVEGPGTPSKGQRWCTLHTEFLWYDASLRSVPPPDYGVPKLHYFEDWGVVTYGSALPAEINRPFLSFKSG
KLGGRAIYDIVHRNKYKEWIKGWRNFNAGHEHPDQNSFTFAPNGVPFITEALYGPKYTFLNNVLMFSPAV
SKSCFSPWEGQITEDCSSKWLKYKHDLAGDCQGRVVAAMERSGVVFIRGEGVGAYNPKLKLRKLQRNLIL
LHPQLLLLVDQIHLEDDSPLEAVTSFFHNVDVPFEETVVDDVHGAFIRHRDGIYKMYWMDDTGHSEKATI
TSRMYPRGYPYNGTNYVNVTTFLRHPVTRAIYIFIGPSVDVQSFTVRGDSPQLDVFVTTSEHAYAVYLWP
VEDGSRSAFAQVIADRQKIVFDRASAIRSSTVPEVKDYVGIVERNLQHFKPVFQQLEKQILSRVRNTASF
RKTAERLLRFSDKRQTEEAIDRIFAISQRQQQQHGRAKKNRKVAKGYKFVDAVPDIFAQIEVNERKVRQK
AQTQAQKELPVDEDEEMKDLLDFADTTYVKHKTGVSIKGRSGLAQMVTTARSSAPSISASYTRLFLILNI
AIFFVMLAMQLTYFQKAKRLHGQRCLYAILLVDSCILLWLYSSCSQSQC
>61622
MRTHTRGAPSVFFIYLLCFVSAYITDENPEVMIPFTNANYDSHPMLYFSRTEVAELQRRAASSHEHIAAR
LTEAVHTMLSSPLEYLPPWDPKDYSARWNEIYGNNLGALAMFCVLYPENIEARDMAKDYMERMAAQPSWL
VKDAPWDEVPLAHSLVGFATAYDFLYNYLSKTQQEKFLEVIANASGYMYETSYRRGWGFQYLHNHQPTNC
MALLTGSLVLMNQGYLQEAYLWTKQVLTIMEKSLILLREVTDGSLYEGVAYGSYTTRSLFQYMFLIQRHF
NINHFGHPWLKQHFAFMYRTILPGFQRTVAIADSNYNWFYGPESQLVFLDKFVMRNGSGNWLADQIRRNR
AVEGPGTPSKGQRWCTLHTEFLWYDASLKSVPPPDFGTPTLHYFEDWGVVTYGSALPAEINRSFLSFKSG
KLGGRAIYDIVHRNKYKDWIKGWRNFNAGHEHPDQNSFTFAPNGVPFITEALYGPKYTFFNNVLMFSPAV
SKSCFSPWEGQVTEDCSSKWSKYKHDLAASCQGRVVAAEEKNGVVFIRGEGVGAYNPQLNLKNVQRNLIL
LHPQLLLLVDQIHLGEESPLETAASFFHNVDVPFEETVVDGVHGAFIRQRDGLYKMYWMDDTGYSEKATF
ASVTYPRGYPYNGTNYVNVTMHLRSPITRAAYLFIGPSIDVQSFTIHGDSQQLDVFIATSKHAYATYLWT
GEATGQSAFAQVIADRHKILFDRNSAIKSSIVPEVKDYAAIVEQNLQHFKPVFQLLEKQILSRVRNTASF
RKTAERLLRFSDKRQTEEAIDRIFAISQQQQQQSKSKKNRRAGKRYKFVDAVPDIFAQIEVNEKKIRQKA
QILAQKELPIDEDEEMKDLLDFADVTYEKHKNGGLMKGRFGQARMMTTTHSRAPSLSASYTRLFLILNIA
IFFVMLAMQLTYFQRAQSLHGQRCLYAVLLIDSCILLWLYSSCSQSQC
>39432
MRTHTRGAPSVFFIYLLCFVSAYITDENPEVMIPFTNANYDSHPMLYFSRAEVAELQLRAASSHEHIAAR
LMEAVHTMLSSPLEYLPPWDPKDYSARWNEIYGNNLGALAMFCVLYPENIEARDMAKDYMERMAAQPSWL
VKDAPWDEVPLAHSLVGFATAYDFLYNYLSKTQQEKFLEVIANASGYMYETSYRRGWGFQYLHNHQPTNC
MALLTGSLVLMNQGYLQEAYLWTKQVLTIMEKSLVLLREVTDGSLYEGVAYGSYTTRSLFQYMFLVQRHF
DINHFGHPWLKQHFAFMYRTILPGFQRTVAIADSNYNWFYGPESQLVFLDKFVMRNGSGNWLADQIRRNR
VVEGPGTPSKGQRWCTLHTEFLWYDASLKSVPPPDFGTPTLHYFEDWGVVTYGSALPAEINRSFLSFKSG
KLGGRAIYDIVHRNKYKDWIKGWRNFNAGHEHPDQNSFTFAPNGVPFITEALYGPKYTFFNNVLMFSPAV
SKSCFSPWEGQVTEDCSSKWSKYKHDLAASCQGRVVAAEEKNGVVFIRGEGVGAYNPQLNLKNVQRNLIL
LHPQLLLLVDQIHLGEESPLEIAASFFHNVDVPFEETMVDGVHGAYIRQRDGLYKMYWMDDTGYSEKATF
ASVTYPRGYPYNGTNYVNVTMHLRSPITRAAYLFIGPSIDVQSFTIHGDSQQLDVFIATSEHAYATYLWT
GEATGQSAFAQVIADHNKILFDQNSAIKSSIVPEVKEYAAIVEQNLQHFKPVFQLLEKQILSRVRNTASF
RKTAERLLRFSDKRQTEEAIDRIFAISQKQQQQSKSKKNRRAGKRYKFVDAVPDIFAQIEVNEKKIRQKA
QILAQKELPIDEDEEMKDLLDFADVTYEKHKNGGLTKGRFGEARMVTSTHSRAPSLSASYTRLFLILNIA
IFFVMLAMQLTYFQRAQSLHGQRCLYAVLLIDSCILLWLYSSCSQSQC
>932674
MRTHTRGAPSVFFINAVCFAFACGAREDRDAMVPFVNANYDSYPMLYFSKGDVESLRLQASTTHQHIAAR
LIEAVQTMLSNPLEYLPPWDPKEFSARWNEIYGNNLGALAMFCVLYPENIEAINMAKDYMERMAAQPSWL
VKDAPWDEVPLAHSLVGFATAYDFLYSYLSKIQQERFLEVIANASGYMYETSYRRGWGFQYLHNHQPTNC
VALLAGSLVLMNQGYLQEAYLWTKQVLAIMEKSVVLLQEVTDGSLYEGVAYGSYTTRSLFQYMFLVQRHF
DINHFSHPWLKQHFAFMYRTVLPGFQRTVAIADSNYNWFYGPESQLVFLDKFVMRNGSGNWLAEQIRRNR
VVEGPGTPSKGQRWCTLHTEFLWYDASLRSVPPPDYGVPKLHYFEDWGVVTYGSALPAEINRPFLSFKSG
KLGGRAIYDIVHKNKYKEWIKGWRNFNAGHEHPDQNSFTFAPNGVPFITEALYGPKYTFFNNVLMFSPAV
SKSCFSPWEGQITEDCSSKWLKYKHDLAGDCQGRVVAATERSGVVFIRGEGVGAYNPKLKLRKLQRNLIL
LHPQLLLLVDQIHLEDDSPLEAATSFFHNVDVPFEETVVDDVHGAFIRHRDGIYKMYWMDDTGHSEKATI
ASRMYPRGYPYNGTNYVNVTTLLRHPLTRAIYLFIGPSVDVQSFTVRGDSPQLEVFVTTGEHAYAVYLWP
VEDGSRSTFAQVIADRQKIVFDRASAIRTSTVPEVKDYIGIVERNLQHFKPVFQQLEKQILSRVRNTASF
RKTAERLLRFSDKRQTEEAIDRIFAISQRQQQQQRGRAKKNRKVAKGYKFVDAVPDIFAQIEVNERKVRQ
KAQTQAQKELPVDEDEEMKDLLDFADITYVKHKTGLSIKGRSGLAQMVTTARSSAPSISASYTRLFLILN
IAIFFVMLAMQLTYFQKAKRLHGQRCLYAILLVDSCILLWLYSSCSQSQC
>885580
MRTYTRGAPSVFFICLLCLGSAYIAAKNLEVMIPFTNANYDSHPMLYFSRSEVAELQLQAVSSHEHIASR
LIEAVHTMLSSPLEYLPPWDPKDYSARWNEIYGNNLGALAMFCVLYPENLEARDMAKDYMERMAAQPSWL
VKDAPWDEVPLAHSLVGFATAYDFLYNYLSRMQQERFLEVIANASGYMYETSYRRGWGFQYLHNHQPTNC
MALLTGSLVLMNQGYLQEAYLWTKQVLTIMEKSLVLLREVTDGSLYEGVAYGSYTTRSLFQYLFLVQRHF
GINHFGHPWLKRHFAFMYRTILPGFQRTVAIADSNYNWFYGPESQLVFLDKFVMRNGSGNWLADQIRRNR
VVEGPGTPSKGQRWCTLHTEFLWYDATLKSVPPQDFGTPALHYFEDWGVVTYGSALPAEINRSFLSFKSG
KLGGRAIYDIVHRNKYKDWIKGWRNFNAGHEHPDQNSFTFAPNGVPFITEALYGPKYTFFNNVLMFSPAV
SKSCFSPWEGQVTEDCSSKWSKYKHDLAASSQGRVVAAVEKGGVVFIRGEAVHAYNPQLKLKNIQRNLIL
LHPQLLLLVDQIQLGEESPLETAASFFHNVDVPFEETVVDGVHGAFLRQRDGLYKMYWMDDTGYSEKATF
ASVTYPRGYPYNGTNYVNVTTHLRRPITRAAYLFIGPSVDVQSFSIHGDWQRLDVFIATSEHAYATYLWT
GETAGQSTFAHVIADRQKILFDQSSAIKSTSVPEVKDYAAIVEQNLQHFKPVFQLLEKQILSRVRNTASF
RETAERLLRFSDKRQTEEAIDRIFAISQQQQQQQQQSKSKKKRQAGKHYKFVDAVPDIFAQIEVNEKKIR
QKAQILAQKELPIDEDEEMKDLLDFADVTYEKHKDGGSMKGRFGQARVVTTTHHRAPTLSASYTRLFLIL
NIAIFFVMLAMQLTYFQRAQSLHSQRCLYAVLLIDSCVLLWLYSSCAQSQC
>215358
MRTHTRGAPTVFFISLLWPLLSPLVVVVAAAVEVDPSAGINFMGGNYNGHPMLYFNRGDVEEMQYAAAGT
HRDMARRIREAGETMLEHPEEYLPPWSPAEFSARWNEVYGNNLGVLSMFCLLYPHRAGALDLAKDYMERM
AAQPSWLVKDAPWDEVPLAHSLVGFATAYDFLYEYLNKGQQERFLQVIGNASRLMYEKSYVRGWGFQYLH
NHQPTNCVALLTGSLVYMTQGYLQEAYLWTKQVLSIMEKSMVLLQDVTDGSLYEGVAYGTYTTRSLFQYM
FLVQRHFAIGHFDHPWLLKHFAFLYRTILPGFQRTVAIADSNYNWFYGPESQLVFLDRYVLRNGSGNWLA
DLIHQNRVIEGPGQAGKGQRWCTLHTEFIWYDPGLIPKPPSDFGTSQLHYFEDWGVVTYGSALPADTNHT
FLSFKSGKLGGRAIFDIVHRNKYKEWIKGWRNFNAGHEHPDQNTFTFAPNGVPFITEALYGPKYTLLNNA
VLFGSAMSGSCFKPWTGQVTEACDSKWLKYKVGLAADTQGKVEAAIERQGMVFIRGEGRSAYNPELKIRN
FQRNLLLLHPQLLLLVDHIHLDPDSPTRAMSAFFHNTELPFQSTKIDGVHGAFVSQGEDKYKMFWMDDTG
YSNKGVVGYWNYPRGYPYNGSNYVNVTMPLRYPHTRVAYIFFGPGVDVQSFSLRGDEQRVDIYLATSDHT
YTIYLLTGEVTSKPLFAMVLLDHRKIVFEKSAAAVDNSPEEVEEYVNVMEDNLQHVKPVFQQMERHILGR
VFNTASFRKTAERLLQFSDKKKTEEVIEKMFAMSKKQGKSKGGKKVNLGEKLSETLPDIFAQIEVNEKKE
RQRTSKRTYEDSPEEGDADSRAFMDYSDGRKNRKGAFVKGRRFKEVYMVATAGSESVSSTASYIRLFLLL
NTATFFLLLAVILTRFQRGRSLHTQRCFYTILLIDCFILLYLYSSCSHTQC
>8208
MKGDELWYSLVNGCQLSSVCWLQFTAQTKHVGAALQTDEGRGLTLCSCVAGYLQEAYLWTKQVLSIMEKS
MVLLQDVTDGSLYEGVAYGTYTTRSLFQYMFLVQRHFSISHFDHPWLLQHFAFLYRTVLPGFQRTVAIAD
SNYNWFYGPESQLVFLDRYVLRNGSGNWLADLIHQNRVMEGPGQAGKGQRWCTLHTEFIWYDPGLFPKPP
SDFGTSQLHHFEDWGVVTYGSALPADTNRTFLSFKAGKLGGRAIFDIVHKNKYKEWIKGWRNFNAGHEHP
DQNTFTFVPNGVPFITEALYGPKYTLLNNALLFSSAIPGSCFKPWAGQVTEACDSKWLKYKVGLAADAQG
RVEAAMERQGMVFIRGEGHSSYSPELKLRNFQRNLLLLHPQLLLLVDHIHLDPDSPTRAMSAFFHNTELP
FQSTKIDGVHGAFVSHGEDNYKMFWMDDTGYSNKGVVGYWNYPRGYPYNGSNYVNVTMPLRYPHTRVAYI
FYGPGVDVQSFSLRGDDQRVDIYLATKEHTYTIYLLTGEVPSKPLFAMVLVDHKKIVFEKSAAAEEDSSP
EEVEEYVNVVEDNLQHVKPVFQQMERHILGRVLNTASFRKTAERLLQFSDKKKTEEVIETMFAMSKKQGR
GKGGRKVNLGEKLSETLPDIFAQVEVNEKKARQRTSKRTYEDSQEEGEGDSRAFMDYTDGRKNRKGAFVK
GRKFKEVHMVATEGSEGLSSTASYIRLFLLLNTATFFLLLAVLLTRFQRGRSLHTQRCFYTILLIDCFIL
LYLYSSCSHSKC
[truncated: 1,864 more rows]
