# Supplementary material for: The structure of human dermatan sulfate epimerase 1 emphasizes the importance of C5-epimerization of glucuronic acid in higher organisms
Source: Chem Sci. 2020 Dec 8;12(5):1869–85. doi: 10.1039/d0sc05971d (PMC8006597; doi:10.1039/d0sc05971d)
Supplement: Supplementary file 6 [file SC-012-D0SC05971D-s006.xlsx]

## Sheet: 183_NAS
Glycan structures	Glycoform Abundance %
HexNAc(4)Hex(4)Fuc(1)	4.91833
HexNAc(6)Hex(3)Fuc(1)NeuAc(1)	2.52578
HexNAc(6)Hex(3)Fuc(1)	19.7245
HexNAc(6)Hex(3)Fuc(2)	46.8724
HexNAc(6)Hex(3)Fuc(3)	25.959

## Sheet: 336_NGS
Glycan structures	Glycoform Abundance %
HexNAc(2)Hex(5)	1.79685
HexNAc(2)Hex(6)	7.08452
HexNAc(2)Hex(7)	10.2411
HexNAc(2)Hex(8)	15.1467
HexNAc(2)Hex(9)	45.2789
HexNAc(2)Hex(10)	20.4519

## Sheet: 411_NRS
Glycan structures	Glycoform Abundance %	NG
HexNAc(4)Hex(3)Fuc(1)	0.0384327
HexNAc(5)Hex(3)	0
HexNAc(5)Hex(3)Fuc(1)	0.075204
HexNAc(5)Hex(3)NeuAc(1)Fuc(2)	0.179127
HexNAc(5)Hex(4)	0.181036
HexNAc(5)Hex(4)NeuAc(1)	0.0973222
HexNAc(5)Hex(4)Fuc(1)	0.651125
HexNAc(5)Hex(4)Fuc(1)NeuAc(1)	0.195539
HexNAc(5)Hex(4)Fuc(1)NeuAc(2)	0
HexNAc(5)Hex(4)Fuc(2)	0.565105
HexNAc(5)Hex(4)Fuc(2)NeuAc(1)	0.0350343
HexNAc(6)Hex(3)Fuc(1)	0.205779
HexNAc(6)Hex(3)Fuc(1)NeuAc(1)	0.0465459
HexNAc(6)Hex(3)Fuc(2)	0.197444
NG		97.5323
	2.46769	97.5

## Sheet: 642_NGT
Glycan structures	Glycoform Abundance %
HexNAc(5)Hex(3)Fuc(1)	8.74902
HexNAc(5)Hex(4)Fuc(1)	39.833
HexNAc(5)Hex(4)Fuc(1)NeuAc(1)	16.179
HexNAc(5)Hex(4)Fuc(2)	35.239
HexNAc(6)Hex(3)Fuc(1)	0
HexNAc(6)Hex(3)Fuc(1)NeuAc(1)	0

## Sheet: 648_NVT
Glycan structures	Glycoform Abundance %
HexNAc(2)Hex(5)	79.4936
HexNAc(2)Hex(6)	20.5064
