# Supplementary material for: The structure of human dermatan sulfate epimerase 1 emphasizes the importance of C5-epimerization of glucuronic acid in higher organisms
Source: Chem Sci. 2020 Dec 8;12(5):1869–85. doi: 10.1039/d0sc05971d (PMC8006597; doi:10.1039/d0sc05971d)
Supplement: Supplementary file 8 [file SC-012-D0SC05971D-s008.xlsx]

## Sheet: Sheet1
Supplementary Table 4. Details on the top 226 Rosetta DS-epi1 models.
# of supporting XLs	Normal distribution score	Rosetta score	Rosetta description	XLs in kojak format
24	133	-1218.12	S_00483	-.HKILFDR(2)--VVAAEEKNGVVFIR(7).-', '-.GEGVGAYNPQLNLKNVQR(14)--VVAAEEKNGVVFIR(7).-', '-.DMAKDYMER(4)--KTAER(1).-', '-.DWIKGWR(4)--WSKYK(3).-', '-.KTAER(1)--DYAAIVEQNLQHFKPVFQLLEK(14).-', '-.FSDKR(4)--KTAER(1).-', '-.HKILFDR(2)--GEGVGAYNPQLNLKNVQR(14).-', '-.KIR(1)--YKFVDAVPDIFAQIEVNEK(2).-', '-.KTAER(1)--DMAKDYMER(4).-', '-.AQILAQKELPIDEDEEMK(7)--KIR(1).-', '-.KTAER(1)--PVFQLLEKQILSR(8).-', '-.KI…
24	132	-1284.95	S_00126	-.HKILFDR(2)--VVAAEEKNGVVFIR(7).-', '-.GEGVGAYNPQLNLKNVQR(14)--VVAAEEKNGVVFIR(7).-', '-.DMAKDYMER(4)--KTAER(1).-', '-.DWIKGWR(4)--WSKYK(3).-', '-.KTAER(1)--DYAAIVEQNLQHFKPVFQLLEK(14).-', '-.FSDKR(4)--KTAER(1).-', '-.HKILFDR(2)--GEGVGAYNPQLNLKNVQR(14).-', '-.KIR(1)--YKFVDAVPDIFAQIEVNEK(2).-', '-.KTAER(1)--DMAKDYMER(4).-', '-.AQILAQKELPIDEDEEMK(7)--KIR(1).-', '-.KTAER(1)--PVFQLLEKQILSR(8).-', '-.KI…
24	127	-1233.68	S_00097	-.HKILFDR(2)--VVAAEEKNGVVFIR(7).-', '-.GEGVGAYNPQLNLKNVQR(14)--VVAAEEKNGVVFIR(7).-', '-.DMAKDYMER(4)--KTAER(1).-', '-.DWIKGWR(4)--WSKYK(3).-', '-.KTAER(1)--DYAAIVEQNLQHFKPVFQLLEK(14).-', '-.FSDKR(4)--KTAER(1).-', '-.HKILFDR(2)--GEGVGAYNPQLNLKNVQR(14).-', '-.KIR(1)--YKFVDAVPDIFAQIEVNEK(2).-', '-.KTAER(1)--DMAKDYMER(4).-', '-.AQILAQKELPIDEDEEMK(7)--KIR(1).-', '-.KTAER(1)--PVFQLLEKQILSR(8).-', '-.KI…
24	127	-1215.43	S_01701	-.HKILFDR(2)--VVAAEEKNGVVFIR(7).-', '-.GEGVGAYNPQLNLKNVQR(14)--VVAAEEKNGVVFIR(7).-', '-.DMAKDYMER(4)--KTAER(1).-', '-.DWIKGWR(4)--WSKYK(3).-', '-.KTAER(1)--DYAAIVEQNLQHFKPVFQLLEK(14).-', '-.FSDKR(4)--KTAER(1).-', '-.HKILFDR(2)--GEGVGAYNPQLNLKNVQR(14).-', '-.KIR(1)--YKFVDAVPDIFAQIEVNEK(2).-', '-.KTAER(1)--DMAKDYMER(4).-', '-.AQILAQKELPIDEDEEMK(7)--KIR(1).-', '-.KTAER(1)--PVFQLLEKQILSR(8).-', '-.KI…
24	126	-1297.38	S_00581	-.HKILFDR(2)--VVAAEEKNGVVFIR(7).-', '-.GEGVGAYNPQLNLKNVQR(14)--VVAAEEKNGVVFIR(7).-', '-.DMAKDYMER(4)--KTAER(1).-', '-.DWIKGWR(4)--WSKYK(3).-', '-.KTAER(1)--DYAAIVEQNLQHFKPVFQLLEK(14).-', '-.FSDKR(4)--KTAER(1).-', '-.HKILFDR(2)--GEGVGAYNPQLNLKNVQR(14).-', '-.KIR(1)--YKFVDAVPDIFAQIEVNEK(2).-', '-.KTAER(1)--DMAKDYMER(4).-', '-.AQILAQKELPIDEDEEMK(7)--KIR(1).-', '-.KTAER(1)--PVFQLLEKQILSR(8).-', '-.KI…
24	123	-1275.13	S_01951	-.HKILFDR(2)--VVAAEEKNGVVFIR(7).-', '-.GEGVGAYNPQLNLKNVQR(14)--VVAAEEKNGVVFIR(7).-', '-.DMAKDYMER(4)--KTAER(1).-', '-.DWIKGWR(4)--WSKYK(3).-', '-.KTAER(1)--DYAAIVEQNLQHFKPVFQLLEK(14).-', '-.FSDKR(4)--KTAER(1).-', '-.HKILFDR(2)--GEGVGAYNPQLNLKNVQR(14).-', '-.KIR(1)--YKFVDAVPDIFAQIEVNEK(2).-', '-.KTAER(1)--DMAKDYMER(4).-', '-.AQILAQKELPIDEDEEMK(7)--KIR(1).-', '-.KTAER(1)--PVFQLLEKQILSR(8).-', '-.KI…
24	123	-1223.12	S_00854	-.HKILFDR(2)--VVAAEEKNGVVFIR(7).-', '-.GEGVGAYNPQLNLKNVQR(14)--VVAAEEKNGVVFIR(7).-', '-.DMAKDYMER(4)--KTAER(1).-', '-.DWIKGWR(4)--WSKYK(3).-', '-.KTAER(1)--DYAAIVEQNLQHFKPVFQLLEK(14).-', '-.FSDKR(4)--KTAER(1).-', '-.HKILFDR(2)--GEGVGAYNPQLNLKNVQR(14).-', '-.KIR(1)--YKFVDAVPDIFAQIEVNEK(2).-', '-.KTAER(1)--DMAKDYMER(4).-', '-.AQILAQKELPIDEDEEMK(7)--KIR(1).-', '-.KTAER(1)--PVFQLLEKQILSR(8).-', '-.KI…
24	123	-1198.13	S_02830	-.HKILFDR(2)--VVAAEEKNGVVFIR(7).-', '-.GEGVGAYNPQLNLKNVQR(14)--VVAAEEKNGVVFIR(7).-', '-.DMAKDYMER(4)--KTAER(1).-', '-.DWIKGWR(4)--WSKYK(3).-', '-.KTAER(1)--DYAAIVEQNLQHFKPVFQLLEK(14).-', '-.FSDKR(4)--KTAER(1).-', '-.HKILFDR(2)--GEGVGAYNPQLNLKNVQR(14).-', '-.KIR(1)--YKFVDAVPDIFAQIEVNEK(2).-', '-.KTAER(1)--DMAKDYMER(4).-', '-.AQILAQKELPIDEDEEMK(7)--KIR(1).-', '-.KTAER(1)--PVFQLLEKQILSR(8).-', '-.KI…
24	122	-1267.22	S_00665	-.HKILFDR(2)--VVAAEEKNGVVFIR(7).-', '-.GEGVGAYNPQLNLKNVQR(14)--VVAAEEKNGVVFIR(7).-', '-.DMAKDYMER(4)--KTAER(1).-', '-.DWIKGWR(4)--WSKYK(3).-', '-.KTAER(1)--DYAAIVEQNLQHFKPVFQLLEK(14).-', '-.FSDKR(4)--KTAER(1).-', '-.HKILFDR(2)--GEGVGAYNPQLNLKNVQR(14).-', '-.KIR(1)--YKFVDAVPDIFAQIEVNEK(2).-', '-.KTAER(1)--DMAKDYMER(4).-', '-.AQILAQKELPIDEDEEMK(7)--KIR(1).-', '-.KTAER(1)--PVFQLLEKQILSR(8).-', '-.KI…
24	122	-1258.36	S_02714	-.HKILFDR(2)--VVAAEEKNGVVFIR(7).-', '-.GEGVGAYNPQLNLKNVQR(14)--VVAAEEKNGVVFIR(7).-', '-.DMAKDYMER(4)--KTAER(1).-', '-.DWIKGWR(4)--WSKYK(3).-', '-.KTAER(1)--DYAAIVEQNLQHFKPVFQLLEK(14).-', '-.FSDKR(4)--KTAER(1).-', '-.HKILFDR(2)--GEGVGAYNPQLNLKNVQR(14).-', '-.KIR(1)--YKFVDAVPDIFAQIEVNEK(2).-', '-.KTAER(1)--DMAKDYMER(4).-', '-.AQILAQKELPIDEDEEMK(7)--KIR(1).-', '-.KTAER(1)--PVFQLLEKQILSR(8).-', '-.KI…
24	121	-1263.94	S_01810	-.HKILFDR(2)--VVAAEEKNGVVFIR(7).-', '-.GEGVGAYNPQLNLKNVQR(14)--VVAAEEKNGVVFIR(7).-', '-.DMAKDYMER(4)--KTAER(1).-', '-.DWIKGWR(4)--WSKYK(3).-', '-.KTAER(1)--DYAAIVEQNLQHFKPVFQLLEK(14).-', '-.FSDKR(4)--KTAER(1).-', '-.HKILFDR(2)--GEGVGAYNPQLNLKNVQR(14).-', '-.KIR(1)--YKFVDAVPDIFAQIEVNEK(2).-', '-.KTAER(1)--DMAKDYMER(4).-', '-.AQILAQKELPIDEDEEMK(7)--KIR(1).-', '-.KTAER(1)--PVFQLLEKQILSR(8).-', '-.KI…
24	121	-1255.13	S_00413	-.HKILFDR(2)--VVAAEEKNGVVFIR(7).-', '-.GEGVGAYNPQLNLKNVQR(14)--VVAAEEKNGVVFIR(7).-', '-.DMAKDYMER(4)--KTAER(1).-', '-.DWIKGWR(4)--WSKYK(3).-', '-.KTAER(1)--DYAAIVEQNLQHFKPVFQLLEK(14).-', '-.FSDKR(4)--KTAER(1).-', '-.HKILFDR(2)--GEGVGAYNPQLNLKNVQR(14).-', '-.KIR(1)--YKFVDAVPDIFAQIEVNEK(2).-', '-.KTAER(1)--DMAKDYMER(4).-', '-.AQILAQKELPIDEDEEMK(7)--KIR(1).-', '-.KTAER(1)--PVFQLLEKQILSR(8).-', '-.KI…
24	120	-1196.91	S_00573	-.HKILFDR(2)--VVAAEEKNGVVFIR(7).-', '-.GEGVGAYNPQLNLKNVQR(14)--VVAAEEKNGVVFIR(7).-', '-.DMAKDYMER(4)--KTAER(1).-', '-.DWIKGWR(4)--WSKYK(3).-', '-.KTAER(1)--DYAAIVEQNLQHFKPVFQLLEK(14).-', '-.FSDKR(4)--KTAER(1).-', '-.HKILFDR(2)--GEGVGAYNPQLNLKNVQR(14).-', '-.KIR(1)--YKFVDAVPDIFAQIEVNEK(2).-', '-.KTAER(1)--DMAKDYMER(4).-', '-.AQILAQKELPIDEDEEMK(7)--KIR(1).-', '-.KTAER(1)--PVFQLLEKQILSR(8).-', '-.KI…
24	120	-1173.27	S_02209	-.HKILFDR(2)--VVAAEEKNGVVFIR(7).-', '-.GEGVGAYNPQLNLKNVQR(14)--VVAAEEKNGVVFIR(7).-', '-.DMAKDYMER(4)--KTAER(1).-', '-.DWIKGWR(4)--WSKYK(3).-', '-.KTAER(1)--DYAAIVEQNLQHFKPVFQLLEK(14).-', '-.FSDKR(4)--KTAER(1).-', '-.HKILFDR(2)--GEGVGAYNPQLNLKNVQR(14).-', '-.KIR(1)--YKFVDAVPDIFAQIEVNEK(2).-', '-.KTAER(1)--DMAKDYMER(4).-', '-.AQILAQKELPIDEDEEMK(7)--KIR(1).-', '-.KTAER(1)--PVFQLLEKQILSR(8).-', '-.KI…
24	119	-1265.84	S_00407	-.HKILFDR(2)--VVAAEEKNGVVFIR(7).-', '-.GEGVGAYNPQLNLKNVQR(14)--VVAAEEKNGVVFIR(7).-', '-.DMAKDYMER(4)--KTAER(1).-', '-.DWIKGWR(4)--WSKYK(3).-', '-.KTAER(1)--DYAAIVEQNLQHFKPVFQLLEK(14).-', '-.FSDKR(4)--KTAER(1).-', '-.HKILFDR(2)--GEGVGAYNPQLNLKNVQR(14).-', '-.KIR(1)--YKFVDAVPDIFAQIEVNEK(2).-', '-.KTAER(1)--DMAKDYMER(4).-', '-.AQILAQKELPIDEDEEMK(7)--KIR(1).-', '-.KTAER(1)--PVFQLLEKQILSR(8).-', '-.KI…
24	118	-1278.35	S_02124	-.HKILFDR(2)--VVAAEEKNGVVFIR(7).-', '-.GEGVGAYNPQLNLKNVQR(14)--VVAAEEKNGVVFIR(7).-', '-.DMAKDYMER(4)--KTAER(1).-', '-.DWIKGWR(4)--WSKYK(3).-', '-.KTAER(1)--DYAAIVEQNLQHFKPVFQLLEK(14).-', '-.FSDKR(4)--KTAER(1).-', '-.HKILFDR(2)--GEGVGAYNPQLNLKNVQR(14).-', '-.KIR(1)--YKFVDAVPDIFAQIEVNEK(2).-', '-.KTAER(1)--DMAKDYMER(4).-', '-.AQILAQKELPIDEDEEMK(7)--KIR(1).-', '-.KTAER(1)--PVFQLLEKQILSR(8).-', '-.KI…
24	118	-1219.88	S_02455	-.HKILFDR(2)--VVAAEEKNGVVFIR(7).-', '-.GEGVGAYNPQLNLKNVQR(14)--VVAAEEKNGVVFIR(7).-', '-.DMAKDYMER(4)--KTAER(1).-', '-.DWIKGWR(4)--WSKYK(3).-', '-.KTAER(1)--DYAAIVEQNLQHFKPVFQLLEK(14).-', '-.FSDKR(4)--KTAER(1).-', '-.HKILFDR(2)--GEGVGAYNPQLNLKNVQR(14).-', '-.KIR(1)--YKFVDAVPDIFAQIEVNEK(2).-', '-.KTAER(1)--DMAKDYMER(4).-', '-.AQILAQKELPIDEDEEMK(7)--KIR(1).-', '-.KTAER(1)--PVFQLLEKQILSR(8).-', '-.KI…
24	117	-1242.88	S_02515	-.HKILFDR(2)--VVAAEEKNGVVFIR(7).-', '-.GEGVGAYNPQLNLKNVQR(14)--VVAAEEKNGVVFIR(7).-', '-.DMAKDYMER(4)--KTAER(1).-', '-.DWIKGWR(4)--WSKYK(3).-', '-.KTAER(1)--DYAAIVEQNLQHFKPVFQLLEK(14).-', '-.FSDKR(4)--KTAER(1).-', '-.HKILFDR(2)--GEGVGAYNPQLNLKNVQR(14).-', '-.KIR(1)--YKFVDAVPDIFAQIEVNEK(2).-', '-.KTAER(1)--DMAKDYMER(4).-', '-.AQILAQKELPIDEDEEMK(7)--KIR(1).-', '-.KTAER(1)--PVFQLLEKQILSR(8).-', '-.KI…
24	117	-1242.1	S_02310	-.HKILFDR(2)--VVAAEEKNGVVFIR(7).-', '-.GEGVGAYNPQLNLKNVQR(14)--VVAAEEKNGVVFIR(7).-', '-.DMAKDYMER(4)--KTAER(1).-', '-.DWIKGWR(4)--WSKYK(3).-', '-.KTAER(1)--DYAAIVEQNLQHFKPVFQLLEK(14).-', '-.FSDKR(4)--KTAER(1).-', '-.HKILFDR(2)--GEGVGAYNPQLNLKNVQR(14).-', '-.KIR(1)--YKFVDAVPDIFAQIEVNEK(2).-', '-.KTAER(1)--DMAKDYMER(4).-', '-.AQILAQKELPIDEDEEMK(7)--KIR(1).-', '-.KTAER(1)--PVFQLLEKQILSR(8).-', '-.KI…
24	116	-1290.39	S_02529	-.HKILFDR(2)--VVAAEEKNGVVFIR(7).-', '-.GEGVGAYNPQLNLKNVQR(14)--VVAAEEKNGVVFIR(7).-', '-.DMAKDYMER(4)--KTAER(1).-', '-.DWIKGWR(4)--WSKYK(3).-', '-.KTAER(1)--DYAAIVEQNLQHFKPVFQLLEK(14).-', '-.FSDKR(4)--KTAER(1).-', '-.HKILFDR(2)--GEGVGAYNPQLNLKNVQR(14).-', '-.KIR(1)--YKFVDAVPDIFAQIEVNEK(2).-', '-.KTAER(1)--DMAKDYMER(4).-', '-.AQILAQKELPIDEDEEMK(7)--KIR(1).-', '-.KTAER(1)--PVFQLLEKQILSR(8).-', '-.KI…
24	116	-1261.24	S_00349	-.HKILFDR(2)--VVAAEEKNGVVFIR(7).-', '-.GEGVGAYNPQLNLKNVQR(14)--VVAAEEKNGVVFIR(7).-', '-.DMAKDYMER(4)--KTAER(1).-', '-.DWIKGWR(4)--WSKYK(3).-', '-.KTAER(1)--DYAAIVEQNLQHFKPVFQLLEK(14).-', '-.FSDKR(4)--KTAER(1).-', '-.HKILFDR(2)--GEGVGAYNPQLNLKNVQR(14).-', '-.KIR(1)--YKFVDAVPDIFAQIEVNEK(2).-', '-.KTAER(1)--DMAKDYMER(4).-', '-.AQILAQKELPIDEDEEMK(7)--KIR(1).-', '-.KTAER(1)--PVFQLLEKQILSR(8).-', '-.KI…
24	116	-1252.75	S_02703	-.HKILFDR(2)--VVAAEEKNGVVFIR(7).-', '-.GEGVGAYNPQLNLKNVQR(14)--VVAAEEKNGVVFIR(7).-', '-.DMAKDYMER(4)--KTAER(1).-', '-.DWIKGWR(4)--WSKYK(3).-', '-.KTAER(1)--DYAAIVEQNLQHFKPVFQLLEK(14).-', '-.FSDKR(4)--KTAER(1).-', '-.HKILFDR(2)--GEGVGAYNPQLNLKNVQR(14).-', '-.KIR(1)--YKFVDAVPDIFAQIEVNEK(2).-', '-.KTAER(1)--DMAKDYMER(4).-', '-.AQILAQKELPIDEDEEMK(7)--KIR(1).-', '-.KTAER(1)--PVFQLLEKQILSR(8).-', '-.KI…
24	116	-1207.16	S_00048	-.HKILFDR(2)--VVAAEEKNGVVFIR(7).-', '-.GEGVGAYNPQLNLKNVQR(14)--VVAAEEKNGVVFIR(7).-', '-.DMAKDYMER(4)--KTAER(1).-', '-.DWIKGWR(4)--WSKYK(3).-', '-.KTAER(1)--DYAAIVEQNLQHFKPVFQLLEK(14).-', '-.FSDKR(4)--KTAER(1).-', '-.HKILFDR(2)--GEGVGAYNPQLNLKNVQR(14).-', '-.KIR(1)--YKFVDAVPDIFAQIEVNEK(2).-', '-.KTAER(1)--DMAKDYMER(4).-', '-.AQILAQKELPIDEDEEMK(7)--KIR(1).-', '-.KTAER(1)--PVFQLLEKQILSR(8).-', '-.KI…
24	116	-1205.63	S_02151	-.HKILFDR(2)--VVAAEEKNGVVFIR(7).-', '-.GEGVGAYNPQLNLKNVQR(14)--VVAAEEKNGVVFIR(7).-', '-.DMAKDYMER(4)--KTAER(1).-', '-.DWIKGWR(4)--WSKYK(3).-', '-.KTAER(1)--DYAAIVEQNLQHFKPVFQLLEK(14).-', '-.FSDKR(4)--KTAER(1).-', '-.HKILFDR(2)--GEGVGAYNPQLNLKNVQR(14).-', '-.KIR(1)--YKFVDAVPDIFAQIEVNEK(2).-', '-.KTAER(1)--DMAKDYMER(4).-', '-.AQILAQKELPIDEDEEMK(7)--KIR(1).-', '-.KTAER(1)--PVFQLLEKQILSR(8).-', '-.KI…
24	116	-1159.46	S_00893	-.HKILFDR(2)--VVAAEEKNGVVFIR(7).-', '-.GEGVGAYNPQLNLKNVQR(14)--VVAAEEKNGVVFIR(7).-', '-.DMAKDYMER(4)--KTAER(1).-', '-.DWIKGWR(4)--WSKYK(3).-', '-.KTAER(1)--DYAAIVEQNLQHFKPVFQLLEK(14).-', '-.FSDKR(4)--KTAER(1).-', '-.HKILFDR(2)--GEGVGAYNPQLNLKNVQR(14).-', '-.KIR(1)--YKFVDAVPDIFAQIEVNEK(2).-', '-.KTAER(1)--DMAKDYMER(4).-', '-.AQILAQKELPIDEDEEMK(7)--KIR(1).-', '-.KTAER(1)--PVFQLLEKQILSR(8).-', '-.KI…
24	115	-1206.46	S_01295	-.HKILFDR(2)--VVAAEEKNGVVFIR(7).-', '-.GEGVGAYNPQLNLKNVQR(14)--VVAAEEKNGVVFIR(7).-', '-.DMAKDYMER(4)--KTAER(1).-', '-.DWIKGWR(4)--WSKYK(3).-', '-.KTAER(1)--DYAAIVEQNLQHFKPVFQLLEK(14).-', '-.FSDKR(4)--KTAER(1).-', '-.HKILFDR(2)--GEGVGAYNPQLNLKNVQR(14).-', '-.KIR(1)--YKFVDAVPDIFAQIEVNEK(2).-', '-.KTAER(1)--DMAKDYMER(4).-', '-.AQILAQKELPIDEDEEMK(7)--KIR(1).-', '-.KTAER(1)--PVFQLLEKQILSR(8).-', '-.KI…
24	115	-1200.52	S_00676	-.HKILFDR(2)--VVAAEEKNGVVFIR(7).-', '-.GEGVGAYNPQLNLKNVQR(14)--VVAAEEKNGVVFIR(7).-', '-.DMAKDYMER(4)--KTAER(1).-', '-.DWIKGWR(4)--WSKYK(3).-', '-.KTAER(1)--DYAAIVEQNLQHFKPVFQLLEK(14).-', '-.FSDKR(4)--KTAER(1).-', '-.HKILFDR(2)--GEGVGAYNPQLNLKNVQR(14).-', '-.KIR(1)--YKFVDAVPDIFAQIEVNEK(2).-', '-.KTAER(1)--DMAKDYMER(4).-', '-.AQILAQKELPIDEDEEMK(7)--KIR(1).-', '-.KTAER(1)--PVFQLLEKQILSR(8).-', '-.KI…
24	113	-1278.76	S_01577	-.HKILFDR(2)--VVAAEEKNGVVFIR(7).-', '-.GEGVGAYNPQLNLKNVQR(14)--VVAAEEKNGVVFIR(7).-', '-.DMAKDYMER(4)--KTAER(1).-', '-.DWIKGWR(4)--WSKYK(3).-', '-.KTAER(1)--DYAAIVEQNLQHFKPVFQLLEK(14).-', '-.FSDKR(4)--KTAER(1).-', '-.HKILFDR(2)--GEGVGAYNPQLNLKNVQR(14).-', '-.KIR(1)--YKFVDAVPDIFAQIEVNEK(2).-', '-.KTAER(1)--DMAKDYMER(4).-', '-.AQILAQKELPIDEDEEMK(7)--KIR(1).-', '-.KTAER(1)--PVFQLLEKQILSR(8).-', '-.KI…
24	113	-1259.06	S_00223	-.HKILFDR(2)--VVAAEEKNGVVFIR(7).-', '-.GEGVGAYNPQLNLKNVQR(14)--VVAAEEKNGVVFIR(7).-', '-.DMAKDYMER(4)--KTAER(1).-', '-.DWIKGWR(4)--WSKYK(3).-', '-.KTAER(1)--DYAAIVEQNLQHFKPVFQLLEK(14).-', '-.FSDKR(4)--KTAER(1).-', '-.HKILFDR(2)--GEGVGAYNPQLNLKNVQR(14).-', '-.KIR(1)--YKFVDAVPDIFAQIEVNEK(2).-', '-.KTAER(1)--DMAKDYMER(4).-', '-.AQILAQKELPIDEDEEMK(7)--KIR(1).-', '-.KTAER(1)--PVFQLLEKQILSR(8).-', '-.KI…
24	113	-1240.52	S_02444	-.HKILFDR(2)--VVAAEEKNGVVFIR(7).-', '-.GEGVGAYNPQLNLKNVQR(14)--VVAAEEKNGVVFIR(7).-', '-.DMAKDYMER(4)--KTAER(1).-', '-.DWIKGWR(4)--WSKYK(3).-', '-.KTAER(1)--DYAAIVEQNLQHFKPVFQLLEK(14).-', '-.FSDKR(4)--KTAER(1).-', '-.HKILFDR(2)--GEGVGAYNPQLNLKNVQR(14).-', '-.KIR(1)--YKFVDAVPDIFAQIEVNEK(2).-', '-.KTAER(1)--DMAKDYMER(4).-', '-.AQILAQKELPIDEDEEMK(7)--KIR(1).-', '-.KTAER(1)--PVFQLLEKQILSR(8).-', '-.KI…
24	113	-1214.23	S_00383	-.HKILFDR(2)--VVAAEEKNGVVFIR(7).-', '-.GEGVGAYNPQLNLKNVQR(14)--VVAAEEKNGVVFIR(7).-', '-.DMAKDYMER(4)--KTAER(1).-', '-.DWIKGWR(4)--WSKYK(3).-', '-.KTAER(1)--DYAAIVEQNLQHFKPVFQLLEK(14).-', '-.FSDKR(4)--KTAER(1).-', '-.HKILFDR(2)--GEGVGAYNPQLNLKNVQR(14).-', '-.KIR(1)--YKFVDAVPDIFAQIEVNEK(2).-', '-.KTAER(1)--DMAKDYMER(4).-', '-.AQILAQKELPIDEDEEMK(7)--KIR(1).-', '-.KTAER(1)--PVFQLLEKQILSR(8).-', '-.KI…
24	113	-1203.28	S_00973	-.HKILFDR(2)--VVAAEEKNGVVFIR(7).-', '-.GEGVGAYNPQLNLKNVQR(14)--VVAAEEKNGVVFIR(7).-', '-.DMAKDYMER(4)--KTAER(1).-', '-.DWIKGWR(4)--WSKYK(3).-', '-.KTAER(1)--DYAAIVEQNLQHFKPVFQLLEK(14).-', '-.FSDKR(4)--KTAER(1).-', '-.HKILFDR(2)--GEGVGAYNPQLNLKNVQR(14).-', '-.KIR(1)--YKFVDAVPDIFAQIEVNEK(2).-', '-.KTAER(1)--DMAKDYMER(4).-', '-.AQILAQKELPIDEDEEMK(7)--KIR(1).-', '-.KTAER(1)--PVFQLLEKQILSR(8).-', '-.KI…
24	112	-1288.25	S_00767	-.HKILFDR(2)--VVAAEEKNGVVFIR(7).-', '-.GEGVGAYNPQLNLKNVQR(14)--VVAAEEKNGVVFIR(7).-', '-.DMAKDYMER(4)--KTAER(1).-', '-.DWIKGWR(4)--WSKYK(3).-', '-.KTAER(1)--DYAAIVEQNLQHFKPVFQLLEK(14).-', '-.FSDKR(4)--KTAER(1).-', '-.HKILFDR(2)--GEGVGAYNPQLNLKNVQR(14).-', '-.KIR(1)--YKFVDAVPDIFAQIEVNEK(2).-', '-.KTAER(1)--DMAKDYMER(4).-', '-.AQILAQKELPIDEDEEMK(7)--KIR(1).-', '-.KTAER(1)--PVFQLLEKQILSR(8).-', '-.KI…
24	112	-1267.93	S_01431	-.HKILFDR(2)--VVAAEEKNGVVFIR(7).-', '-.GEGVGAYNPQLNLKNVQR(14)--VVAAEEKNGVVFIR(7).-', '-.DMAKDYMER(4)--KTAER(1).-', '-.DWIKGWR(4)--WSKYK(3).-', '-.KTAER(1)--DYAAIVEQNLQHFKPVFQLLEK(14).-', '-.FSDKR(4)--KTAER(1).-', '-.HKILFDR(2)--GEGVGAYNPQLNLKNVQR(14).-', '-.KIR(1)--YKFVDAVPDIFAQIEVNEK(2).-', '-.KTAER(1)--DMAKDYMER(4).-', '-.AQILAQKELPIDEDEEMK(7)--KIR(1).-', '-.KTAER(1)--PVFQLLEKQILSR(8).-', '-.KI…
24	112	-1229.07	S_01661	-.HKILFDR(2)--VVAAEEKNGVVFIR(7).-', '-.GEGVGAYNPQLNLKNVQR(14)--VVAAEEKNGVVFIR(7).-', '-.DMAKDYMER(4)--KTAER(1).-', '-.DWIKGWR(4)--WSKYK(3).-', '-.KTAER(1)--DYAAIVEQNLQHFKPVFQLLEK(14).-', '-.FSDKR(4)--KTAER(1).-', '-.HKILFDR(2)--GEGVGAYNPQLNLKNVQR(14).-', '-.KIR(1)--YKFVDAVPDIFAQIEVNEK(2).-', '-.KTAER(1)--DMAKDYMER(4).-', '-.AQILAQKELPIDEDEEMK(7)--KIR(1).-', '-.KTAER(1)--PVFQLLEKQILSR(8).-', '-.KI…
24	112	-1219.66	S_00015	-.HKILFDR(2)--VVAAEEKNGVVFIR(7).-', '-.GEGVGAYNPQLNLKNVQR(14)--VVAAEEKNGVVFIR(7).-', '-.DMAKDYMER(4)--KTAER(1).-', '-.DWIKGWR(4)--WSKYK(3).-', '-.KTAER(1)--DYAAIVEQNLQHFKPVFQLLEK(14).-', '-.FSDKR(4)--KTAER(1).-', '-.HKILFDR(2)--GEGVGAYNPQLNLKNVQR(14).-', '-.KIR(1)--YKFVDAVPDIFAQIEVNEK(2).-', '-.KTAER(1)--DMAKDYMER(4).-', '-.AQILAQKELPIDEDEEMK(7)--KIR(1).-', '-.KTAER(1)--PVFQLLEKQILSR(8).-', '-.KI…
24	111	-1307.21	S_01888	-.HKILFDR(2)--VVAAEEKNGVVFIR(7).-', '-.GEGVGAYNPQLNLKNVQR(14)--VVAAEEKNGVVFIR(7).-', '-.DMAKDYMER(4)--KTAER(1).-', '-.DWIKGWR(4)--WSKYK(3).-', '-.KTAER(1)--DYAAIVEQNLQHFKPVFQLLEK(14).-', '-.FSDKR(4)--KTAER(1).-', '-.HKILFDR(2)--GEGVGAYNPQLNLKNVQR(14).-', '-.KIR(1)--YKFVDAVPDIFAQIEVNEK(2).-', '-.KTAER(1)--DMAKDYMER(4).-', '-.AQILAQKELPIDEDEEMK(7)--KIR(1).-', '-.KTAER(1)--PVFQLLEKQILSR(8).-', '-.KI…
24	111	-1292.97	S_02465	-.HKILFDR(2)--VVAAEEKNGVVFIR(7).-', '-.GEGVGAYNPQLNLKNVQR(14)--VVAAEEKNGVVFIR(7).-', '-.DMAKDYMER(4)--KTAER(1).-', '-.DWIKGWR(4)--WSKYK(3).-', '-.KTAER(1)--DYAAIVEQNLQHFKPVFQLLEK(14).-', '-.FSDKR(4)--KTAER(1).-', '-.HKILFDR(2)--GEGVGAYNPQLNLKNVQR(14).-', '-.KIR(1)--YKFVDAVPDIFAQIEVNEK(2).-', '-.KTAER(1)--DMAKDYMER(4).-', '-.AQILAQKELPIDEDEEMK(7)--KIR(1).-', '-.KTAER(1)--PVFQLLEKQILSR(8).-', '-.KI…
24	111	-1285.09	S_00586	-.HKILFDR(2)--VVAAEEKNGVVFIR(7).-', '-.GEGVGAYNPQLNLKNVQR(14)--VVAAEEKNGVVFIR(7).-', '-.DMAKDYMER(4)--KTAER(1).-', '-.DWIKGWR(4)--WSKYK(3).-', '-.KTAER(1)--DYAAIVEQNLQHFKPVFQLLEK(14).-', '-.FSDKR(4)--KTAER(1).-', '-.HKILFDR(2)--GEGVGAYNPQLNLKNVQR(14).-', '-.KIR(1)--YKFVDAVPDIFAQIEVNEK(2).-', '-.KTAER(1)--DMAKDYMER(4).-', '-.AQILAQKELPIDEDEEMK(7)--KIR(1).-', '-.KTAER(1)--PVFQLLEKQILSR(8).-', '-.KI…
24	111	-1259.29	S_00265	-.HKILFDR(2)--VVAAEEKNGVVFIR(7).-', '-.GEGVGAYNPQLNLKNVQR(14)--VVAAEEKNGVVFIR(7).-', '-.DMAKDYMER(4)--KTAER(1).-', '-.DWIKGWR(4)--WSKYK(3).-', '-.KTAER(1)--DYAAIVEQNLQHFKPVFQLLEK(14).-', '-.FSDKR(4)--KTAER(1).-', '-.HKILFDR(2)--GEGVGAYNPQLNLKNVQR(14).-', '-.KIR(1)--YKFVDAVPDIFAQIEVNEK(2).-', '-.KTAER(1)--DMAKDYMER(4).-', '-.AQILAQKELPIDEDEEMK(7)--KIR(1).-', '-.KTAER(1)--PVFQLLEKQILSR(8).-', '-.KI…
24	111	-1231.15	S_02447	-.HKILFDR(2)--VVAAEEKNGVVFIR(7).-', '-.GEGVGAYNPQLNLKNVQR(14)--VVAAEEKNGVVFIR(7).-', '-.DMAKDYMER(4)--KTAER(1).-', '-.DWIKGWR(4)--WSKYK(3).-', '-.KTAER(1)--DYAAIVEQNLQHFKPVFQLLEK(14).-', '-.FSDKR(4)--KTAER(1).-', '-.HKILFDR(2)--GEGVGAYNPQLNLKNVQR(14).-', '-.KIR(1)--YKFVDAVPDIFAQIEVNEK(2).-', '-.KTAER(1)--DMAKDYMER(4).-', '-.AQILAQKELPIDEDEEMK(7)--KIR(1).-', '-.KTAER(1)--PVFQLLEKQILSR(8).-', '-.KI…
24	111	-1226.44	S_00375	-.HKILFDR(2)--VVAAEEKNGVVFIR(7).-', '-.GEGVGAYNPQLNLKNVQR(14)--VVAAEEKNGVVFIR(7).-', '-.DMAKDYMER(4)--KTAER(1).-', '-.DWIKGWR(4)--WSKYK(3).-', '-.KTAER(1)--DYAAIVEQNLQHFKPVFQLLEK(14).-', '-.FSDKR(4)--KTAER(1).-', '-.HKILFDR(2)--GEGVGAYNPQLNLKNVQR(14).-', '-.KIR(1)--YKFVDAVPDIFAQIEVNEK(2).-', '-.KTAER(1)--DMAKDYMER(4).-', '-.AQILAQKELPIDEDEEMK(7)--KIR(1).-', '-.KTAER(1)--PVFQLLEKQILSR(8).-', '-.KI…
24	111	-1202.4	S_01076	-.HKILFDR(2)--VVAAEEKNGVVFIR(7).-', '-.GEGVGAYNPQLNLKNVQR(14)--VVAAEEKNGVVFIR(7).-', '-.DMAKDYMER(4)--KTAER(1).-', '-.DWIKGWR(4)--WSKYK(3).-', '-.KTAER(1)--DYAAIVEQNLQHFKPVFQLLEK(14).-', '-.FSDKR(4)--KTAER(1).-', '-.HKILFDR(2)--GEGVGAYNPQLNLKNVQR(14).-', '-.KIR(1)--YKFVDAVPDIFAQIEVNEK(2).-', '-.KTAER(1)--DMAKDYMER(4).-', '-.AQILAQKELPIDEDEEMK(7)--KIR(1).-', '-.KTAER(1)--PVFQLLEKQILSR(8).-', '-.KI…
24	111	-1192.69	S_01607	-.HKILFDR(2)--VVAAEEKNGVVFIR(7).-', '-.GEGVGAYNPQLNLKNVQR(14)--VVAAEEKNGVVFIR(7).-', '-.DMAKDYMER(4)--KTAER(1).-', '-.DWIKGWR(4)--WSKYK(3).-', '-.KTAER(1)--DYAAIVEQNLQHFKPVFQLLEK(14).-', '-.FSDKR(4)--KTAER(1).-', '-.HKILFDR(2)--GEGVGAYNPQLNLKNVQR(14).-', '-.KIR(1)--YKFVDAVPDIFAQIEVNEK(2).-', '-.KTAER(1)--DMAKDYMER(4).-', '-.AQILAQKELPIDEDEEMK(7)--KIR(1).-', '-.KTAER(1)--PVFQLLEKQILSR(8).-', '-.KI…
24	110	-1286.48	S_02300	-.HKILFDR(2)--VVAAEEKNGVVFIR(7).-', '-.GEGVGAYNPQLNLKNVQR(14)--VVAAEEKNGVVFIR(7).-', '-.DMAKDYMER(4)--KTAER(1).-', '-.DWIKGWR(4)--WSKYK(3).-', '-.KTAER(1)--DYAAIVEQNLQHFKPVFQLLEK(14).-', '-.FSDKR(4)--KTAER(1).-', '-.HKILFDR(2)--GEGVGAYNPQLNLKNVQR(14).-', '-.KIR(1)--YKFVDAVPDIFAQIEVNEK(2).-', '-.KTAER(1)--DMAKDYMER(4).-', '-.AQILAQKELPIDEDEEMK(7)--KIR(1).-', '-.KTAER(1)--PVFQLLEKQILSR(8).-', '-.KI…
24	110	-1283.77	S_01069	-.HKILFDR(2)--VVAAEEKNGVVFIR(7).-', '-.GEGVGAYNPQLNLKNVQR(14)--VVAAEEKNGVVFIR(7).-', '-.DMAKDYMER(4)--KTAER(1).-', '-.DWIKGWR(4)--WSKYK(3).-', '-.KTAER(1)--DYAAIVEQNLQHFKPVFQLLEK(14).-', '-.FSDKR(4)--KTAER(1).-', '-.HKILFDR(2)--GEGVGAYNPQLNLKNVQR(14).-', '-.KIR(1)--YKFVDAVPDIFAQIEVNEK(2).-', '-.KTAER(1)--DMAKDYMER(4).-', '-.AQILAQKELPIDEDEEMK(7)--KIR(1).-', '-.KTAER(1)--PVFQLLEKQILSR(8).-', '-.KI…
24	110	-1266.89	S_02099	-.HKILFDR(2)--VVAAEEKNGVVFIR(7).-', '-.GEGVGAYNPQLNLKNVQR(14)--VVAAEEKNGVVFIR(7).-', '-.DMAKDYMER(4)--KTAER(1).-', '-.DWIKGWR(4)--WSKYK(3).-', '-.KTAER(1)--DYAAIVEQNLQHFKPVFQLLEK(14).-', '-.FSDKR(4)--KTAER(1).-', '-.HKILFDR(2)--GEGVGAYNPQLNLKNVQR(14).-', '-.KIR(1)--YKFVDAVPDIFAQIEVNEK(2).-', '-.KTAER(1)--DMAKDYMER(4).-', '-.AQILAQKELPIDEDEEMK(7)--KIR(1).-', '-.KTAER(1)--PVFQLLEKQILSR(8).-', '-.KI…
24	110	-1223.83	S_01020	-.HKILFDR(2)--VVAAEEKNGVVFIR(7).-', '-.GEGVGAYNPQLNLKNVQR(14)--VVAAEEKNGVVFIR(7).-', '-.DMAKDYMER(4)--KTAER(1).-', '-.DWIKGWR(4)--WSKYK(3).-', '-.KTAER(1)--DYAAIVEQNLQHFKPVFQLLEK(14).-', '-.FSDKR(4)--KTAER(1).-', '-.HKILFDR(2)--GEGVGAYNPQLNLKNVQR(14).-', '-.KIR(1)--YKFVDAVPDIFAQIEVNEK(2).-', '-.KTAER(1)--DMAKDYMER(4).-', '-.AQILAQKELPIDEDEEMK(7)--KIR(1).-', '-.KTAER(1)--PVFQLLEKQILSR(8).-', '-.KI…
24	110	-1217.95	S_01999	-.HKILFDR(2)--VVAAEEKNGVVFIR(7).-', '-.GEGVGAYNPQLNLKNVQR(14)--VVAAEEKNGVVFIR(7).-', '-.DMAKDYMER(4)--KTAER(1).-', '-.DWIKGWR(4)--WSKYK(3).-', '-.KTAER(1)--DYAAIVEQNLQHFKPVFQLLEK(14).-', '-.FSDKR(4)--KTAER(1).-', '-.HKILFDR(2)--GEGVGAYNPQLNLKNVQR(14).-', '-.KIR(1)--YKFVDAVPDIFAQIEVNEK(2).-', '-.KTAER(1)--DMAKDYMER(4).-', '-.AQILAQKELPIDEDEEMK(7)--KIR(1).-', '-.KTAER(1)--PVFQLLEKQILSR(8).-', '-.KI…
24	110	-1174.67	S_00589	-.HKILFDR(2)--VVAAEEKNGVVFIR(7).-', '-.GEGVGAYNPQLNLKNVQR(14)--VVAAEEKNGVVFIR(7).-', '-.DMAKDYMER(4)--KTAER(1).-', '-.DWIKGWR(4)--WSKYK(3).-', '-.KTAER(1)--DYAAIVEQNLQHFKPVFQLLEK(14).-', '-.FSDKR(4)--KTAER(1).-', '-.HKILFDR(2)--GEGVGAYNPQLNLKNVQR(14).-', '-.KIR(1)--YKFVDAVPDIFAQIEVNEK(2).-', '-.KTAER(1)--DMAKDYMER(4).-', '-.AQILAQKELPIDEDEEMK(7)--KIR(1).-', '-.KTAER(1)--PVFQLLEKQILSR(8).-', '-.KI…
24	109	-1300.15	S_01105	-.HKILFDR(2)--VVAAEEKNGVVFIR(7).-', '-.GEGVGAYNPQLNLKNVQR(14)--VVAAEEKNGVVFIR(7).-', '-.DMAKDYMER(4)--KTAER(1).-', '-.DWIKGWR(4)--WSKYK(3).-', '-.KTAER(1)--DYAAIVEQNLQHFKPVFQLLEK(14).-', '-.FSDKR(4)--KTAER(1).-', '-.HKILFDR(2)--GEGVGAYNPQLNLKNVQR(14).-', '-.KIR(1)--YKFVDAVPDIFAQIEVNEK(2).-', '-.KTAER(1)--DMAKDYMER(4).-', '-.AQILAQKELPIDEDEEMK(7)--KIR(1).-', '-.KTAER(1)--PVFQLLEKQILSR(8).-', '-.KI…
24	109	-1281.59	S_02904	-.HKILFDR(2)--VVAAEEKNGVVFIR(7).-', '-.GEGVGAYNPQLNLKNVQR(14)--VVAAEEKNGVVFIR(7).-', '-.DMAKDYMER(4)--KTAER(1).-', '-.DWIKGWR(4)--WSKYK(3).-', '-.KTAER(1)--DYAAIVEQNLQHFKPVFQLLEK(14).-', '-.FSDKR(4)--KTAER(1).-', '-.HKILFDR(2)--GEGVGAYNPQLNLKNVQR(14).-', '-.KIR(1)--YKFVDAVPDIFAQIEVNEK(2).-', '-.KTAER(1)--DMAKDYMER(4).-', '-.AQILAQKELPIDEDEEMK(7)--KIR(1).-', '-.KTAER(1)--PVFQLLEKQILSR(8).-', '-.KI…
24	109	-1264.09	S_01336	-.HKILFDR(2)--VVAAEEKNGVVFIR(7).-', '-.GEGVGAYNPQLNLKNVQR(14)--VVAAEEKNGVVFIR(7).-', '-.DMAKDYMER(4)--KTAER(1).-', '-.DWIKGWR(4)--WSKYK(3).-', '-.KTAER(1)--DYAAIVEQNLQHFKPVFQLLEK(14).-', '-.FSDKR(4)--KTAER(1).-', '-.HKILFDR(2)--GEGVGAYNPQLNLKNVQR(14).-', '-.KIR(1)--YKFVDAVPDIFAQIEVNEK(2).-', '-.KTAER(1)--DMAKDYMER(4).-', '-.AQILAQKELPIDEDEEMK(7)--KIR(1).-', '-.KTAER(1)--PVFQLLEKQILSR(8).-', '-.KI…
24	109	-1240.89	S_01148	-.HKILFDR(2)--VVAAEEKNGVVFIR(7).-', '-.GEGVGAYNPQLNLKNVQR(14)--VVAAEEKNGVVFIR(7).-', '-.DMAKDYMER(4)--KTAER(1).-', '-.DWIKGWR(4)--WSKYK(3).-', '-.KTAER(1)--DYAAIVEQNLQHFKPVFQLLEK(14).-', '-.FSDKR(4)--KTAER(1).-', '-.HKILFDR(2)--GEGVGAYNPQLNLKNVQR(14).-', '-.KIR(1)--YKFVDAVPDIFAQIEVNEK(2).-', '-.KTAER(1)--DMAKDYMER(4).-', '-.AQILAQKELPIDEDEEMK(7)--KIR(1).-', '-.KTAER(1)--PVFQLLEKQILSR(8).-', '-.KI…
24	109	-1229.61	S_01665	-.HKILFDR(2)--VVAAEEKNGVVFIR(7).-', '-.GEGVGAYNPQLNLKNVQR(14)--VVAAEEKNGVVFIR(7).-', '-.DMAKDYMER(4)--KTAER(1).-', '-.DWIKGWR(4)--WSKYK(3).-', '-.KTAER(1)--DYAAIVEQNLQHFKPVFQLLEK(14).-', '-.FSDKR(4)--KTAER(1).-', '-.HKILFDR(2)--GEGVGAYNPQLNLKNVQR(14).-', '-.KIR(1)--YKFVDAVPDIFAQIEVNEK(2).-', '-.KTAER(1)--DMAKDYMER(4).-', '-.AQILAQKELPIDEDEEMK(7)--KIR(1).-', '-.KTAER(1)--PVFQLLEKQILSR(8).-', '-.KI…
24	109	-1227.4	S_01028	-.HKILFDR(2)--VVAAEEKNGVVFIR(7).-', '-.GEGVGAYNPQLNLKNVQR(14)--VVAAEEKNGVVFIR(7).-', '-.DMAKDYMER(4)--KTAER(1).-', '-.DWIKGWR(4)--WSKYK(3).-', '-.KTAER(1)--DYAAIVEQNLQHFKPVFQLLEK(14).-', '-.FSDKR(4)--KTAER(1).-', '-.HKILFDR(2)--GEGVGAYNPQLNLKNVQR(14).-', '-.KIR(1)--YKFVDAVPDIFAQIEVNEK(2).-', '-.KTAER(1)--DMAKDYMER(4).-', '-.AQILAQKELPIDEDEEMK(7)--KIR(1).-', '-.KTAER(1)--PVFQLLEKQILSR(8).-', '-.KI…
24	108	-1288.23	S_01856	-.HKILFDR(2)--VVAAEEKNGVVFIR(7).-', '-.GEGVGAYNPQLNLKNVQR(14)--VVAAEEKNGVVFIR(7).-', '-.DMAKDYMER(4)--KTAER(1).-', '-.DWIKGWR(4)--WSKYK(3).-', '-.KTAER(1)--DYAAIVEQNLQHFKPVFQLLEK(14).-', '-.FSDKR(4)--KTAER(1).-', '-.HKILFDR(2)--GEGVGAYNPQLNLKNVQR(14).-', '-.KIR(1)--YKFVDAVPDIFAQIEVNEK(2).-', '-.KTAER(1)--DMAKDYMER(4).-', '-.AQILAQKELPIDEDEEMK(7)--KIR(1).-', '-.KTAER(1)--PVFQLLEKQILSR(8).-', '-.KI…
24	108	-1281.45	S_00160	-.HKILFDR(2)--VVAAEEKNGVVFIR(7).-', '-.GEGVGAYNPQLNLKNVQR(14)--VVAAEEKNGVVFIR(7).-', '-.DMAKDYMER(4)--KTAER(1).-', '-.DWIKGWR(4)--WSKYK(3).-', '-.KTAER(1)--DYAAIVEQNLQHFKPVFQLLEK(14).-', '-.FSDKR(4)--KTAER(1).-', '-.HKILFDR(2)--GEGVGAYNPQLNLKNVQR(14).-', '-.KIR(1)--YKFVDAVPDIFAQIEVNEK(2).-', '-.KTAER(1)--DMAKDYMER(4).-', '-.AQILAQKELPIDEDEEMK(7)--KIR(1).-', '-.KTAER(1)--PVFQLLEKQILSR(8).-', '-.KI…
24	108	-1268.82	S_02032	-.HKILFDR(2)--VVAAEEKNGVVFIR(7).-', '-.GEGVGAYNPQLNLKNVQR(14)--VVAAEEKNGVVFIR(7).-', '-.DMAKDYMER(4)--KTAER(1).-', '-.DWIKGWR(4)--WSKYK(3).-', '-.KTAER(1)--DYAAIVEQNLQHFKPVFQLLEK(14).-', '-.FSDKR(4)--KTAER(1).-', '-.HKILFDR(2)--GEGVGAYNPQLNLKNVQR(14).-', '-.KIR(1)--YKFVDAVPDIFAQIEVNEK(2).-', '-.KTAER(1)--DMAKDYMER(4).-', '-.AQILAQKELPIDEDEEMK(7)--KIR(1).-', '-.KTAER(1)--PVFQLLEKQILSR(8).-', '-.KI…
24	107	-1282.12	S_00071	-.HKILFDR(2)--VVAAEEKNGVVFIR(7).-', '-.GEGVGAYNPQLNLKNVQR(14)--VVAAEEKNGVVFIR(7).-', '-.DMAKDYMER(4)--KTAER(1).-', '-.DWIKGWR(4)--WSKYK(3).-', '-.KTAER(1)--DYAAIVEQNLQHFKPVFQLLEK(14).-', '-.FSDKR(4)--KTAER(1).-', '-.HKILFDR(2)--GEGVGAYNPQLNLKNVQR(14).-', '-.KIR(1)--YKFVDAVPDIFAQIEVNEK(2).-', '-.KTAER(1)--DMAKDYMER(4).-', '-.AQILAQKELPIDEDEEMK(7)--KIR(1).-', '-.KTAER(1)--PVFQLLEKQILSR(8).-', '-.KI…
24	107	-1273.3	S_02798	-.HKILFDR(2)--VVAAEEKNGVVFIR(7).-', '-.GEGVGAYNPQLNLKNVQR(14)--VVAAEEKNGVVFIR(7).-', '-.DMAKDYMER(4)--KTAER(1).-', '-.DWIKGWR(4)--WSKYK(3).-', '-.KTAER(1)--DYAAIVEQNLQHFKPVFQLLEK(14).-', '-.FSDKR(4)--KTAER(1).-', '-.HKILFDR(2)--GEGVGAYNPQLNLKNVQR(14).-', '-.KIR(1)--YKFVDAVPDIFAQIEVNEK(2).-', '-.KTAER(1)--DMAKDYMER(4).-', '-.AQILAQKELPIDEDEEMK(7)--KIR(1).-', '-.KTAER(1)--PVFQLLEKQILSR(8).-', '-.KI…
24	107	-1254.77	S_01573	-.HKILFDR(2)--VVAAEEKNGVVFIR(7).-', '-.GEGVGAYNPQLNLKNVQR(14)--VVAAEEKNGVVFIR(7).-', '-.DMAKDYMER(4)--KTAER(1).-', '-.DWIKGWR(4)--WSKYK(3).-', '-.KTAER(1)--DYAAIVEQNLQHFKPVFQLLEK(14).-', '-.FSDKR(4)--KTAER(1).-', '-.HKILFDR(2)--GEGVGAYNPQLNLKNVQR(14).-', '-.KIR(1)--YKFVDAVPDIFAQIEVNEK(2).-', '-.KTAER(1)--DMAKDYMER(4).-', '-.AQILAQKELPIDEDEEMK(7)--KIR(1).-', '-.KTAER(1)--PVFQLLEKQILSR(8).-', '-.KI…
24	107	-1241.41	S_02563	-.HKILFDR(2)--VVAAEEKNGVVFIR(7).-', '-.GEGVGAYNPQLNLKNVQR(14)--VVAAEEKNGVVFIR(7).-', '-.DMAKDYMER(4)--KTAER(1).-', '-.DWIKGWR(4)--WSKYK(3).-', '-.KTAER(1)--DYAAIVEQNLQHFKPVFQLLEK(14).-', '-.FSDKR(4)--KTAER(1).-', '-.HKILFDR(2)--GEGVGAYNPQLNLKNVQR(14).-', '-.KIR(1)--YKFVDAVPDIFAQIEVNEK(2).-', '-.KTAER(1)--DMAKDYMER(4).-', '-.AQILAQKELPIDEDEEMK(7)--KIR(1).-', '-.KTAER(1)--PVFQLLEKQILSR(8).-', '-.KI…
24	107	-1234.88	S_01736	-.HKILFDR(2)--VVAAEEKNGVVFIR(7).-', '-.GEGVGAYNPQLNLKNVQR(14)--VVAAEEKNGVVFIR(7).-', '-.DMAKDYMER(4)--KTAER(1).-', '-.DWIKGWR(4)--WSKYK(3).-', '-.KTAER(1)--DYAAIVEQNLQHFKPVFQLLEK(14).-', '-.FSDKR(4)--KTAER(1).-', '-.HKILFDR(2)--GEGVGAYNPQLNLKNVQR(14).-', '-.KIR(1)--YKFVDAVPDIFAQIEVNEK(2).-', '-.KTAER(1)--DMAKDYMER(4).-', '-.AQILAQKELPIDEDEEMK(7)--KIR(1).-', '-.KTAER(1)--PVFQLLEKQILSR(8).-', '-.KI…
24	107	-1215.16	S_02995	-.HKILFDR(2)--VVAAEEKNGVVFIR(7).-', '-.GEGVGAYNPQLNLKNVQR(14)--VVAAEEKNGVVFIR(7).-', '-.DMAKDYMER(4)--KTAER(1).-', '-.DWIKGWR(4)--WSKYK(3).-', '-.KTAER(1)--DYAAIVEQNLQHFKPVFQLLEK(14).-', '-.FSDKR(4)--KTAER(1).-', '-.HKILFDR(2)--GEGVGAYNPQLNLKNVQR(14).-', '-.KIR(1)--YKFVDAVPDIFAQIEVNEK(2).-', '-.KTAER(1)--DMAKDYMER(4).-', '-.AQILAQKELPIDEDEEMK(7)--KIR(1).-', '-.KTAER(1)--PVFQLLEKQILSR(8).-', '-.KI…
24	106	-1269.8	S_02327	-.HKILFDR(2)--VVAAEEKNGVVFIR(7).-', '-.GEGVGAYNPQLNLKNVQR(14)--VVAAEEKNGVVFIR(7).-', '-.DMAKDYMER(4)--KTAER(1).-', '-.DWIKGWR(4)--WSKYK(3).-', '-.KTAER(1)--DYAAIVEQNLQHFKPVFQLLEK(14).-', '-.FSDKR(4)--KTAER(1).-', '-.HKILFDR(2)--GEGVGAYNPQLNLKNVQR(14).-', '-.KIR(1)--YKFVDAVPDIFAQIEVNEK(2).-', '-.KTAER(1)--DMAKDYMER(4).-', '-.AQILAQKELPIDEDEEMK(7)--KIR(1).-', '-.KTAER(1)--PVFQLLEKQILSR(8).-', '-.KI…
24	106	-1268.57	S_01802	-.HKILFDR(2)--VVAAEEKNGVVFIR(7).-', '-.GEGVGAYNPQLNLKNVQR(14)--VVAAEEKNGVVFIR(7).-', '-.DMAKDYMER(4)--KTAER(1).-', '-.DWIKGWR(4)--WSKYK(3).-', '-.KTAER(1)--DYAAIVEQNLQHFKPVFQLLEK(14).-', '-.FSDKR(4)--KTAER(1).-', '-.HKILFDR(2)--GEGVGAYNPQLNLKNVQR(14).-', '-.KIR(1)--YKFVDAVPDIFAQIEVNEK(2).-', '-.KTAER(1)--DMAKDYMER(4).-', '-.AQILAQKELPIDEDEEMK(7)--KIR(1).-', '-.KTAER(1)--PVFQLLEKQILSR(8).-', '-.KI…
24	106	-1260.56	S_00030	-.HKILFDR(2)--VVAAEEKNGVVFIR(7).-', '-.GEGVGAYNPQLNLKNVQR(14)--VVAAEEKNGVVFIR(7).-', '-.DMAKDYMER(4)--KTAER(1).-', '-.DWIKGWR(4)--WSKYK(3).-', '-.KTAER(1)--DYAAIVEQNLQHFKPVFQLLEK(14).-', '-.FSDKR(4)--KTAER(1).-', '-.HKILFDR(2)--GEGVGAYNPQLNLKNVQR(14).-', '-.KIR(1)--YKFVDAVPDIFAQIEVNEK(2).-', '-.KTAER(1)--DMAKDYMER(4).-', '-.AQILAQKELPIDEDEEMK(7)--KIR(1).-', '-.KTAER(1)--PVFQLLEKQILSR(8).-', '-.KI…
24	106	-1259.31	S_01930	-.HKILFDR(2)--VVAAEEKNGVVFIR(7).-', '-.GEGVGAYNPQLNLKNVQR(14)--VVAAEEKNGVVFIR(7).-', '-.DMAKDYMER(4)--KTAER(1).-', '-.DWIKGWR(4)--WSKYK(3).-', '-.KTAER(1)--DYAAIVEQNLQHFKPVFQLLEK(14).-', '-.FSDKR(4)--KTAER(1).-', '-.HKILFDR(2)--GEGVGAYNPQLNLKNVQR(14).-', '-.KIR(1)--YKFVDAVPDIFAQIEVNEK(2).-', '-.KTAER(1)--DMAKDYMER(4).-', '-.AQILAQKELPIDEDEEMK(7)--KIR(1).-', '-.KTAER(1)--PVFQLLEKQILSR(8).-', '-.KI…
24	106	-1242.94	S_02589	-.HKILFDR(2)--VVAAEEKNGVVFIR(7).-', '-.GEGVGAYNPQLNLKNVQR(14)--VVAAEEKNGVVFIR(7).-', '-.DMAKDYMER(4)--KTAER(1).-', '-.DWIKGWR(4)--WSKYK(3).-', '-.KTAER(1)--DYAAIVEQNLQHFKPVFQLLEK(14).-', '-.FSDKR(4)--KTAER(1).-', '-.HKILFDR(2)--GEGVGAYNPQLNLKNVQR(14).-', '-.KIR(1)--YKFVDAVPDIFAQIEVNEK(2).-', '-.KTAER(1)--DMAKDYMER(4).-', '-.AQILAQKELPIDEDEEMK(7)--KIR(1).-', '-.KTAER(1)--PVFQLLEKQILSR(8).-', '-.KI…
24	106	-1227.94	S_01986	-.HKILFDR(2)--VVAAEEKNGVVFIR(7).-', '-.GEGVGAYNPQLNLKNVQR(14)--VVAAEEKNGVVFIR(7).-', '-.DMAKDYMER(4)--KTAER(1).-', '-.DWIKGWR(4)--WSKYK(3).-', '-.KTAER(1)--DYAAIVEQNLQHFKPVFQLLEK(14).-', '-.FSDKR(4)--KTAER(1).-', '-.HKILFDR(2)--GEGVGAYNPQLNLKNVQR(14).-', '-.KIR(1)--YKFVDAVPDIFAQIEVNEK(2).-', '-.KTAER(1)--DMAKDYMER(4).-', '-.AQILAQKELPIDEDEEMK(7)--KIR(1).-', '-.KTAER(1)--PVFQLLEKQILSR(8).-', '-.KI…
24	106	-1215.04	S_01213	-.HKILFDR(2)--VVAAEEKNGVVFIR(7).-', '-.GEGVGAYNPQLNLKNVQR(14)--VVAAEEKNGVVFIR(7).-', '-.DMAKDYMER(4)--KTAER(1).-', '-.DWIKGWR(4)--WSKYK(3).-', '-.KTAER(1)--DYAAIVEQNLQHFKPVFQLLEK(14).-', '-.FSDKR(4)--KTAER(1).-', '-.HKILFDR(2)--GEGVGAYNPQLNLKNVQR(14).-', '-.KIR(1)--YKFVDAVPDIFAQIEVNEK(2).-', '-.KTAER(1)--DMAKDYMER(4).-', '-.AQILAQKELPIDEDEEMK(7)--KIR(1).-', '-.KTAER(1)--PVFQLLEKQILSR(8).-', '-.KI…
24	106	-1212.78	S_02867	-.HKILFDR(2)--VVAAEEKNGVVFIR(7).-', '-.GEGVGAYNPQLNLKNVQR(14)--VVAAEEKNGVVFIR(7).-', '-.DMAKDYMER(4)--KTAER(1).-', '-.DWIKGWR(4)--WSKYK(3).-', '-.KTAER(1)--DYAAIVEQNLQHFKPVFQLLEK(14).-', '-.FSDKR(4)--KTAER(1).-', '-.HKILFDR(2)--GEGVGAYNPQLNLKNVQR(14).-', '-.KIR(1)--YKFVDAVPDIFAQIEVNEK(2).-', '-.KTAER(1)--DMAKDYMER(4).-', '-.AQILAQKELPIDEDEEMK(7)--KIR(1).-', '-.KTAER(1)--PVFQLLEKQILSR(8).-', '-.KI…
24	105	-1270.79	S_00761	-.HKILFDR(2)--VVAAEEKNGVVFIR(7).-', '-.GEGVGAYNPQLNLKNVQR(14)--VVAAEEKNGVVFIR(7).-', '-.DMAKDYMER(4)--KTAER(1).-', '-.DWIKGWR(4)--WSKYK(3).-', '-.KTAER(1)--DYAAIVEQNLQHFKPVFQLLEK(14).-', '-.FSDKR(4)--KTAER(1).-', '-.HKILFDR(2)--GEGVGAYNPQLNLKNVQR(14).-', '-.KIR(1)--YKFVDAVPDIFAQIEVNEK(2).-', '-.KTAER(1)--DMAKDYMER(4).-', '-.AQILAQKELPIDEDEEMK(7)--KIR(1).-', '-.KTAER(1)--PVFQLLEKQILSR(8).-', '-.KI…
24	105	-1265.33	S_01968	-.HKILFDR(2)--VVAAEEKNGVVFIR(7).-', '-.GEGVGAYNPQLNLKNVQR(14)--VVAAEEKNGVVFIR(7).-', '-.DMAKDYMER(4)--KTAER(1).-', '-.DWIKGWR(4)--WSKYK(3).-', '-.KTAER(1)--DYAAIVEQNLQHFKPVFQLLEK(14).-', '-.FSDKR(4)--KTAER(1).-', '-.HKILFDR(2)--GEGVGAYNPQLNLKNVQR(14).-', '-.KIR(1)--YKFVDAVPDIFAQIEVNEK(2).-', '-.KTAER(1)--DMAKDYMER(4).-', '-.AQILAQKELPIDEDEEMK(7)--KIR(1).-', '-.KTAER(1)--PVFQLLEKQILSR(8).-', '-.KI…
24	105	-1260.02	S_00172	-.HKILFDR(2)--VVAAEEKNGVVFIR(7).-', '-.GEGVGAYNPQLNLKNVQR(14)--VVAAEEKNGVVFIR(7).-', '-.DMAKDYMER(4)--KTAER(1).-', '-.DWIKGWR(4)--WSKYK(3).-', '-.KTAER(1)--DYAAIVEQNLQHFKPVFQLLEK(14).-', '-.FSDKR(4)--KTAER(1).-', '-.HKILFDR(2)--GEGVGAYNPQLNLKNVQR(14).-', '-.KIR(1)--YKFVDAVPDIFAQIEVNEK(2).-', '-.KTAER(1)--DMAKDYMER(4).-', '-.AQILAQKELPIDEDEEMK(7)--KIR(1).-', '-.KTAER(1)--PVFQLLEKQILSR(8).-', '-.KI…
24	105	-1247.05	S_02832	-.HKILFDR(2)--VVAAEEKNGVVFIR(7).-', '-.GEGVGAYNPQLNLKNVQR(14)--VVAAEEKNGVVFIR(7).-', '-.DMAKDYMER(4)--KTAER(1).-', '-.DWIKGWR(4)--WSKYK(3).-', '-.KTAER(1)--DYAAIVEQNLQHFKPVFQLLEK(14).-', '-.FSDKR(4)--KTAER(1).-', '-.HKILFDR(2)--GEGVGAYNPQLNLKNVQR(14).-', '-.KIR(1)--YKFVDAVPDIFAQIEVNEK(2).-', '-.KTAER(1)--DMAKDYMER(4).-', '-.AQILAQKELPIDEDEEMK(7)--KIR(1).-', '-.KTAER(1)--PVFQLLEKQILSR(8).-', '-.KI…
24	105	-1178.07	S_02288	-.HKILFDR(2)--VVAAEEKNGVVFIR(7).-', '-.GEGVGAYNPQLNLKNVQR(14)--VVAAEEKNGVVFIR(7).-', '-.DMAKDYMER(4)--KTAER(1).-', '-.DWIKGWR(4)--WSKYK(3).-', '-.KTAER(1)--DYAAIVEQNLQHFKPVFQLLEK(14).-', '-.FSDKR(4)--KTAER(1).-', '-.HKILFDR(2)--GEGVGAYNPQLNLKNVQR(14).-', '-.KIR(1)--YKFVDAVPDIFAQIEVNEK(2).-', '-.KTAER(1)--DMAKDYMER(4).-', '-.AQILAQKELPIDEDEEMK(7)--KIR(1).-', '-.KTAER(1)--PVFQLLEKQILSR(8).-', '-.KI…
24	104	-1277.61	S_01347	-.HKILFDR(2)--VVAAEEKNGVVFIR(7).-', '-.GEGVGAYNPQLNLKNVQR(14)--VVAAEEKNGVVFIR(7).-', '-.DMAKDYMER(4)--KTAER(1).-', '-.DWIKGWR(4)--WSKYK(3).-', '-.KTAER(1)--DYAAIVEQNLQHFKPVFQLLEK(14).-', '-.FSDKR(4)--KTAER(1).-', '-.HKILFDR(2)--GEGVGAYNPQLNLKNVQR(14).-', '-.KIR(1)--YKFVDAVPDIFAQIEVNEK(2).-', '-.KTAER(1)--DMAKDYMER(4).-', '-.AQILAQKELPIDEDEEMK(7)--KIR(1).-', '-.KTAER(1)--PVFQLLEKQILSR(8).-', '-.KI…
24	104	-1274.38	S_02236	-.HKILFDR(2)--VVAAEEKNGVVFIR(7).-', '-.GEGVGAYNPQLNLKNVQR(14)--VVAAEEKNGVVFIR(7).-', '-.DMAKDYMER(4)--KTAER(1).-', '-.DWIKGWR(4)--WSKYK(3).-', '-.KTAER(1)--DYAAIVEQNLQHFKPVFQLLEK(14).-', '-.FSDKR(4)--KTAER(1).-', '-.HKILFDR(2)--GEGVGAYNPQLNLKNVQR(14).-', '-.KIR(1)--YKFVDAVPDIFAQIEVNEK(2).-', '-.KTAER(1)--DMAKDYMER(4).-', '-.AQILAQKELPIDEDEEMK(7)--KIR(1).-', '-.KTAER(1)--PVFQLLEKQILSR(8).-', '-.KI…
24	104	-1270.03	S_02074	-.HKILFDR(2)--VVAAEEKNGVVFIR(7).-', '-.GEGVGAYNPQLNLKNVQR(14)--VVAAEEKNGVVFIR(7).-', '-.DMAKDYMER(4)--KTAER(1).-', '-.DWIKGWR(4)--WSKYK(3).-', '-.KTAER(1)--DYAAIVEQNLQHFKPVFQLLEK(14).-', '-.FSDKR(4)--KTAER(1).-', '-.HKILFDR(2)--GEGVGAYNPQLNLKNVQR(14).-', '-.KIR(1)--YKFVDAVPDIFAQIEVNEK(2).-', '-.KTAER(1)--DMAKDYMER(4).-', '-.AQILAQKELPIDEDEEMK(7)--KIR(1).-', '-.KTAER(1)--PVFQLLEKQILSR(8).-', '-.KI…
24	104	-1258.82	S_02794	-.HKILFDR(2)--VVAAEEKNGVVFIR(7).-', '-.GEGVGAYNPQLNLKNVQR(14)--VVAAEEKNGVVFIR(7).-', '-.DMAKDYMER(4)--KTAER(1).-', '-.DWIKGWR(4)--WSKYK(3).-', '-.KTAER(1)--DYAAIVEQNLQHFKPVFQLLEK(14).-', '-.FSDKR(4)--KTAER(1).-', '-.HKILFDR(2)--GEGVGAYNPQLNLKNVQR(14).-', '-.KIR(1)--YKFVDAVPDIFAQIEVNEK(2).-', '-.KTAER(1)--DMAKDYMER(4).-', '-.AQILAQKELPIDEDEEMK(7)--KIR(1).-', '-.KTAER(1)--PVFQLLEKQILSR(8).-', '-.KI…
24	104	-1245.12	S_02278	-.HKILFDR(2)--VVAAEEKNGVVFIR(7).-', '-.GEGVGAYNPQLNLKNVQR(14)--VVAAEEKNGVVFIR(7).-', '-.DMAKDYMER(4)--KTAER(1).-', '-.DWIKGWR(4)--WSKYK(3).-', '-.KTAER(1)--DYAAIVEQNLQHFKPVFQLLEK(14).-', '-.FSDKR(4)--KTAER(1).-', '-.HKILFDR(2)--GEGVGAYNPQLNLKNVQR(14).-', '-.KIR(1)--YKFVDAVPDIFAQIEVNEK(2).-', '-.KTAER(1)--DMAKDYMER(4).-', '-.AQILAQKELPIDEDEEMK(7)--KIR(1).-', '-.KTAER(1)--PVFQLLEKQILSR(8).-', '-.KI…
24	104	-1236.84	S_01682	-.HKILFDR(2)--VVAAEEKNGVVFIR(7).-', '-.GEGVGAYNPQLNLKNVQR(14)--VVAAEEKNGVVFIR(7).-', '-.DMAKDYMER(4)--KTAER(1).-', '-.DWIKGWR(4)--WSKYK(3).-', '-.KTAER(1)--DYAAIVEQNLQHFKPVFQLLEK(14).-', '-.FSDKR(4)--KTAER(1).-', '-.HKILFDR(2)--GEGVGAYNPQLNLKNVQR(14).-', '-.KIR(1)--YKFVDAVPDIFAQIEVNEK(2).-', '-.KTAER(1)--DMAKDYMER(4).-', '-.AQILAQKELPIDEDEEMK(7)--KIR(1).-', '-.KTAER(1)--PVFQLLEKQILSR(8).-', '-.KI…
24	104	-1219.28	S_01645	-.HKILFDR(2)--VVAAEEKNGVVFIR(7).-', '-.GEGVGAYNPQLNLKNVQR(14)--VVAAEEKNGVVFIR(7).-', '-.DMAKDYMER(4)--KTAER(1).-', '-.DWIKGWR(4)--WSKYK(3).-', '-.KTAER(1)--DYAAIVEQNLQHFKPVFQLLEK(14).-', '-.FSDKR(4)--KTAER(1).-', '-.HKILFDR(2)--GEGVGAYNPQLNLKNVQR(14).-', '-.KIR(1)--YKFVDAVPDIFAQIEVNEK(2).-', '-.KTAER(1)--DMAKDYMER(4).-', '-.AQILAQKELPIDEDEEMK(7)--KIR(1).-', '-.KTAER(1)--PVFQLLEKQILSR(8).-', '-.KI…
24	104	-1216.44	S_00002	-.HKILFDR(2)--VVAAEEKNGVVFIR(7).-', '-.GEGVGAYNPQLNLKNVQR(14)--VVAAEEKNGVVFIR(7).-', '-.DMAKDYMER(4)--KTAER(1).-', '-.DWIKGWR(4)--WSKYK(3).-', '-.KTAER(1)--DYAAIVEQNLQHFKPVFQLLEK(14).-', '-.FSDKR(4)--KTAER(1).-', '-.HKILFDR(2)--GEGVGAYNPQLNLKNVQR(14).-', '-.KIR(1)--YKFVDAVPDIFAQIEVNEK(2).-', '-.KTAER(1)--DMAKDYMER(4).-', '-.AQILAQKELPIDEDEEMK(7)--KIR(1).-', '-.KTAER(1)--PVFQLLEKQILSR(8).-', '-.KI…
24	103	-1277.33	S_00440	-.HKILFDR(2)--VVAAEEKNGVVFIR(7).-', '-.GEGVGAYNPQLNLKNVQR(14)--VVAAEEKNGVVFIR(7).-', '-.DMAKDYMER(4)--KTAER(1).-', '-.DWIKGWR(4)--WSKYK(3).-', '-.KTAER(1)--DYAAIVEQNLQHFKPVFQLLEK(14).-', '-.FSDKR(4)--KTAER(1).-', '-.HKILFDR(2)--GEGVGAYNPQLNLKNVQR(14).-', '-.KIR(1)--YKFVDAVPDIFAQIEVNEK(2).-', '-.KTAER(1)--DMAKDYMER(4).-', '-.AQILAQKELPIDEDEEMK(7)--KIR(1).-', '-.KTAER(1)--PVFQLLEKQILSR(8).-', '-.KI…
24	103	-1263.95	S_00833	-.HKILFDR(2)--VVAAEEKNGVVFIR(7).-', '-.GEGVGAYNPQLNLKNVQR(14)--VVAAEEKNGVVFIR(7).-', '-.DMAKDYMER(4)--KTAER(1).-', '-.DWIKGWR(4)--WSKYK(3).-', '-.KTAER(1)--DYAAIVEQNLQHFKPVFQLLEK(14).-', '-.FSDKR(4)--KTAER(1).-', '-.HKILFDR(2)--GEGVGAYNPQLNLKNVQR(14).-', '-.KIR(1)--YKFVDAVPDIFAQIEVNEK(2).-', '-.KTAER(1)--DMAKDYMER(4).-', '-.AQILAQKELPIDEDEEMK(7)--KIR(1).-', '-.KTAER(1)--PVFQLLEKQILSR(8).-', '-.KI…
24	103	-1259.16	S_00772	-.HKILFDR(2)--VVAAEEKNGVVFIR(7).-', '-.GEGVGAYNPQLNLKNVQR(14)--VVAAEEKNGVVFIR(7).-', '-.DMAKDYMER(4)--KTAER(1).-', '-.DWIKGWR(4)--WSKYK(3).-', '-.KTAER(1)--DYAAIVEQNLQHFKPVFQLLEK(14).-', '-.FSDKR(4)--KTAER(1).-', '-.HKILFDR(2)--GEGVGAYNPQLNLKNVQR(14).-', '-.KIR(1)--YKFVDAVPDIFAQIEVNEK(2).-', '-.KTAER(1)--DMAKDYMER(4).-', '-.AQILAQKELPIDEDEEMK(7)--KIR(1).-', '-.KTAER(1)--PVFQLLEKQILSR(8).-', '-.KI…
24	103	-1242	S_02863	-.HKILFDR(2)--VVAAEEKNGVVFIR(7).-', '-.GEGVGAYNPQLNLKNVQR(14)--VVAAEEKNGVVFIR(7).-', '-.DMAKDYMER(4)--KTAER(1).-', '-.DWIKGWR(4)--WSKYK(3).-', '-.KTAER(1)--DYAAIVEQNLQHFKPVFQLLEK(14).-', '-.FSDKR(4)--KTAER(1).-', '-.HKILFDR(2)--GEGVGAYNPQLNLKNVQR(14).-', '-.KIR(1)--YKFVDAVPDIFAQIEVNEK(2).-', '-.KTAER(1)--DMAKDYMER(4).-', '-.AQILAQKELPIDEDEEMK(7)--KIR(1).-', '-.KTAER(1)--PVFQLLEKQILSR(8).-', '-.KI…
24	103	-1152.85	S_01165	-.HKILFDR(2)--VVAAEEKNGVVFIR(7).-', '-.GEGVGAYNPQLNLKNVQR(14)--VVAAEEKNGVVFIR(7).-', '-.DMAKDYMER(4)--KTAER(1).-', '-.DWIKGWR(4)--WSKYK(3).-', '-.KTAER(1)--DYAAIVEQNLQHFKPVFQLLEK(14).-', '-.FSDKR(4)--KTAER(1).-', '-.HKILFDR(2)--GEGVGAYNPQLNLKNVQR(14).-', '-.KIR(1)--YKFVDAVPDIFAQIEVNEK(2).-', '-.KTAER(1)--DMAKDYMER(4).-', '-.AQILAQKELPIDEDEEMK(7)--KIR(1).-', '-.KTAER(1)--PVFQLLEKQILSR(8).-', '-.KI…
24	102	-1283.75	S_00474	-.HKILFDR(2)--VVAAEEKNGVVFIR(7).-', '-.GEGVGAYNPQLNLKNVQR(14)--VVAAEEKNGVVFIR(7).-', '-.DMAKDYMER(4)--KTAER(1).-', '-.DWIKGWR(4)--WSKYK(3).-', '-.KTAER(1)--DYAAIVEQNLQHFKPVFQLLEK(14).-', '-.FSDKR(4)--KTAER(1).-', '-.HKILFDR(2)--GEGVGAYNPQLNLKNVQR(14).-', '-.KIR(1)--YKFVDAVPDIFAQIEVNEK(2).-', '-.KTAER(1)--DMAKDYMER(4).-', '-.AQILAQKELPIDEDEEMK(7)--KIR(1).-', '-.KTAER(1)--PVFQLLEKQILSR(8).-', '-.KI…
24	102	-1276.88	S_00193	-.HKILFDR(2)--VVAAEEKNGVVFIR(7).-', '-.GEGVGAYNPQLNLKNVQR(14)--VVAAEEKNGVVFIR(7).-', '-.DMAKDYMER(4)--KTAER(1).-', '-.DWIKGWR(4)--WSKYK(3).-', '-.KTAER(1)--DYAAIVEQNLQHFKPVFQLLEK(14).-', '-.FSDKR(4)--KTAER(1).-', '-.HKILFDR(2)--GEGVGAYNPQLNLKNVQR(14).-', '-.KIR(1)--YKFVDAVPDIFAQIEVNEK(2).-', '-.KTAER(1)--DMAKDYMER(4).-', '-.AQILAQKELPIDEDEEMK(7)--KIR(1).-', '-.KTAER(1)--PVFQLLEKQILSR(8).-', '-.KI…
24	102	-1274.59	S_00481	-.HKILFDR(2)--VVAAEEKNGVVFIR(7).-', '-.GEGVGAYNPQLNLKNVQR(14)--VVAAEEKNGVVFIR(7).-', '-.DMAKDYMER(4)--KTAER(1).-', '-.DWIKGWR(4)--WSKYK(3).-', '-.KTAER(1)--DYAAIVEQNLQHFKPVFQLLEK(14).-', '-.FSDKR(4)--KTAER(1).-', '-.HKILFDR(2)--GEGVGAYNPQLNLKNVQR(14).-', '-.KIR(1)--YKFVDAVPDIFAQIEVNEK(2).-', '-.KTAER(1)--DMAKDYMER(4).-', '-.AQILAQKELPIDEDEEMK(7)--KIR(1).-', '-.KTAER(1)--PVFQLLEKQILSR(8).-', '-.KI…
24	102	-1273.33	S_01156	-.HKILFDR(2)--VVAAEEKNGVVFIR(7).-', '-.GEGVGAYNPQLNLKNVQR(14)--VVAAEEKNGVVFIR(7).-', '-.DMAKDYMER(4)--KTAER(1).-', '-.DWIKGWR(4)--WSKYK(3).-', '-.KTAER(1)--DYAAIVEQNLQHFKPVFQLLEK(14).-', '-.FSDKR(4)--KTAER(1).-', '-.HKILFDR(2)--GEGVGAYNPQLNLKNVQR(14).-', '-.KIR(1)--YKFVDAVPDIFAQIEVNEK(2).-', '-.KTAER(1)--DMAKDYMER(4).-', '-.AQILAQKELPIDEDEEMK(7)--KIR(1).-', '-.KTAER(1)--PVFQLLEKQILSR(8).-', '-.KI…
24	102	-1259.86	S_02829	-.HKILFDR(2)--VVAAEEKNGVVFIR(7).-', '-.GEGVGAYNPQLNLKNVQR(14)--VVAAEEKNGVVFIR(7).-', '-.DMAKDYMER(4)--KTAER(1).-', '-.DWIKGWR(4)--WSKYK(3).-', '-.KTAER(1)--DYAAIVEQNLQHFKPVFQLLEK(14).-', '-.FSDKR(4)--KTAER(1).-', '-.HKILFDR(2)--GEGVGAYNPQLNLKNVQR(14).-', '-.KIR(1)--YKFVDAVPDIFAQIEVNEK(2).-', '-.KTAER(1)--DMAKDYMER(4).-', '-.AQILAQKELPIDEDEEMK(7)--KIR(1).-', '-.KTAER(1)--PVFQLLEKQILSR(8).-', '-.KI…
24	102	-1241.83	S_01306	-.HKILFDR(2)--VVAAEEKNGVVFIR(7).-', '-.GEGVGAYNPQLNLKNVQR(14)--VVAAEEKNGVVFIR(7).-', '-.DMAKDYMER(4)--KTAER(1).-', '-.DWIKGWR(4)--WSKYK(3).-', '-.KTAER(1)--DYAAIVEQNLQHFKPVFQLLEK(14).-', '-.FSDKR(4)--KTAER(1).-', '-.HKILFDR(2)--GEGVGAYNPQLNLKNVQR(14).-', '-.KIR(1)--YKFVDAVPDIFAQIEVNEK(2).-', '-.KTAER(1)--DMAKDYMER(4).-', '-.AQILAQKELPIDEDEEMK(7)--KIR(1).-', '-.KTAER(1)--PVFQLLEKQILSR(8).-', '-.KI…
24	102	-1229.76	S_02972	-.HKILFDR(2)--VVAAEEKNGVVFIR(7).-', '-.GEGVGAYNPQLNLKNVQR(14)--VVAAEEKNGVVFIR(7).-', '-.DMAKDYMER(4)--KTAER(1).-', '-.DWIKGWR(4)--WSKYK(3).-', '-.KTAER(1)--DYAAIVEQNLQHFKPVFQLLEK(14).-', '-.FSDKR(4)--KTAER(1).-', '-.HKILFDR(2)--GEGVGAYNPQLNLKNVQR(14).-', '-.KIR(1)--YKFVDAVPDIFAQIEVNEK(2).-', '-.KTAER(1)--DMAKDYMER(4).-', '-.AQILAQKELPIDEDEEMK(7)--KIR(1).-', '-.KTAER(1)--PVFQLLEKQILSR(8).-', '-.KI…
24	102	-1222.73	S_00260	-.HKILFDR(2)--VVAAEEKNGVVFIR(7).-', '-.GEGVGAYNPQLNLKNVQR(14)--VVAAEEKNGVVFIR(7).-', '-.DMAKDYMER(4)--KTAER(1).-', '-.DWIKGWR(4)--WSKYK(3).-', '-.KTAER(1)--DYAAIVEQNLQHFKPVFQLLEK(14).-', '-.FSDKR(4)--KTAER(1).-', '-.HKILFDR(2)--GEGVGAYNPQLNLKNVQR(14).-', '-.KIR(1)--YKFVDAVPDIFAQIEVNEK(2).-', '-.KTAER(1)--DMAKDYMER(4).-', '-.AQILAQKELPIDEDEEMK(7)--KIR(1).-', '-.KTAER(1)--PVFQLLEKQILSR(8).-', '-.KI…
24	102	-1201.22	S_01926	-.HKILFDR(2)--VVAAEEKNGVVFIR(7).-', '-.GEGVGAYNPQLNLKNVQR(14)--VVAAEEKNGVVFIR(7).-', '-.DMAKDYMER(4)--KTAER(1).-', '-.DWIKGWR(4)--WSKYK(3).-', '-.KTAER(1)--DYAAIVEQNLQHFKPVFQLLEK(14).-', '-.FSDKR(4)--KTAER(1).-', '-.HKILFDR(2)--GEGVGAYNPQLNLKNVQR(14).-', '-.KIR(1)--YKFVDAVPDIFAQIEVNEK(2).-', '-.KTAER(1)--DMAKDYMER(4).-', '-.AQILAQKELPIDEDEEMK(7)--KIR(1).-', '-.KTAER(1)--PVFQLLEKQILSR(8).-', '-.KI…
24	101	-1307.4	S_02806	-.HKILFDR(2)--VVAAEEKNGVVFIR(7).-', '-.GEGVGAYNPQLNLKNVQR(14)--VVAAEEKNGVVFIR(7).-', '-.DMAKDYMER(4)--KTAER(1).-', '-.DWIKGWR(4)--WSKYK(3).-', '-.KTAER(1)--DYAAIVEQNLQHFKPVFQLLEK(14).-', '-.FSDKR(4)--KTAER(1).-', '-.HKILFDR(2)--GEGVGAYNPQLNLKNVQR(14).-', '-.KIR(1)--YKFVDAVPDIFAQIEVNEK(2).-', '-.KTAER(1)--DMAKDYMER(4).-', '-.AQILAQKELPIDEDEEMK(7)--KIR(1).-', '-.KTAER(1)--PVFQLLEKQILSR(8).-', '-.KI…
24	101	-1282.6	S_00829	-.HKILFDR(2)--VVAAEEKNGVVFIR(7).-', '-.GEGVGAYNPQLNLKNVQR(14)--VVAAEEKNGVVFIR(7).-', '-.DMAKDYMER(4)--KTAER(1).-', '-.DWIKGWR(4)--WSKYK(3).-', '-.KTAER(1)--DYAAIVEQNLQHFKPVFQLLEK(14).-', '-.FSDKR(4)--KTAER(1).-', '-.HKILFDR(2)--GEGVGAYNPQLNLKNVQR(14).-', '-.KIR(1)--YKFVDAVPDIFAQIEVNEK(2).-', '-.KTAER(1)--DMAKDYMER(4).-', '-.AQILAQKELPIDEDEEMK(7)--KIR(1).-', '-.KTAER(1)--PVFQLLEKQILSR(8).-', '-.KI…
24	101	-1282.29	S_02733	-.HKILFDR(2)--VVAAEEKNGVVFIR(7).-', '-.GEGVGAYNPQLNLKNVQR(14)--VVAAEEKNGVVFIR(7).-', '-.DMAKDYMER(4)--KTAER(1).-', '-.DWIKGWR(4)--WSKYK(3).-', '-.KTAER(1)--DYAAIVEQNLQHFKPVFQLLEK(14).-', '-.FSDKR(4)--KTAER(1).-', '-.HKILFDR(2)--GEGVGAYNPQLNLKNVQR(14).-', '-.KIR(1)--YKFVDAVPDIFAQIEVNEK(2).-', '-.KTAER(1)--DMAKDYMER(4).-', '-.AQILAQKELPIDEDEEMK(7)--KIR(1).-', '-.KTAER(1)--PVFQLLEKQILSR(8).-', '-.KI…
24	101	-1276.43	S_00359	-.HKILFDR(2)--VVAAEEKNGVVFIR(7).-', '-.GEGVGAYNPQLNLKNVQR(14)--VVAAEEKNGVVFIR(7).-', '-.DMAKDYMER(4)--KTAER(1).-', '-.DWIKGWR(4)--WSKYK(3).-', '-.KTAER(1)--DYAAIVEQNLQHFKPVFQLLEK(14).-', '-.FSDKR(4)--KTAER(1).-', '-.HKILFDR(2)--GEGVGAYNPQLNLKNVQR(14).-', '-.KIR(1)--YKFVDAVPDIFAQIEVNEK(2).-', '-.KTAER(1)--DMAKDYMER(4).-', '-.AQILAQKELPIDEDEEMK(7)--KIR(1).-', '-.KTAER(1)--PVFQLLEKQILSR(8).-', '-.KI…
24	101	-1276.09	S_01717	-.HKILFDR(2)--VVAAEEKNGVVFIR(7).-', '-.GEGVGAYNPQLNLKNVQR(14)--VVAAEEKNGVVFIR(7).-', '-.DMAKDYMER(4)--KTAER(1).-', '-.DWIKGWR(4)--WSKYK(3).-', '-.KTAER(1)--DYAAIVEQNLQHFKPVFQLLEK(14).-', '-.FSDKR(4)--KTAER(1).-', '-.HKILFDR(2)--GEGVGAYNPQLNLKNVQR(14).-', '-.KIR(1)--YKFVDAVPDIFAQIEVNEK(2).-', '-.KTAER(1)--DMAKDYMER(4).-', '-.AQILAQKELPIDEDEEMK(7)--KIR(1).-', '-.KTAER(1)--PVFQLLEKQILSR(8).-', '-.KI…
24	101	-1267.01	S_01841	-.HKILFDR(2)--VVAAEEKNGVVFIR(7).-', '-.GEGVGAYNPQLNLKNVQR(14)--VVAAEEKNGVVFIR(7).-', '-.DMAKDYMER(4)--KTAER(1).-', '-.DWIKGWR(4)--WSKYK(3).-', '-.KTAER(1)--DYAAIVEQNLQHFKPVFQLLEK(14).-', '-.FSDKR(4)--KTAER(1).-', '-.HKILFDR(2)--GEGVGAYNPQLNLKNVQR(14).-', '-.KIR(1)--YKFVDAVPDIFAQIEVNEK(2).-', '-.KTAER(1)--DMAKDYMER(4).-', '-.AQILAQKELPIDEDEEMK(7)--KIR(1).-', '-.KTAER(1)--PVFQLLEKQILSR(8).-', '-.KI…
24	101	-1247.01	S_00609	-.HKILFDR(2)--VVAAEEKNGVVFIR(7).-', '-.GEGVGAYNPQLNLKNVQR(14)--VVAAEEKNGVVFIR(7).-', '-.DMAKDYMER(4)--KTAER(1).-', '-.DWIKGWR(4)--WSKYK(3).-', '-.KTAER(1)--DYAAIVEQNLQHFKPVFQLLEK(14).-', '-.FSDKR(4)--KTAER(1).-', '-.HKILFDR(2)--GEGVGAYNPQLNLKNVQR(14).-', '-.KIR(1)--YKFVDAVPDIFAQIEVNEK(2).-', '-.KTAER(1)--DMAKDYMER(4).-', '-.AQILAQKELPIDEDEEMK(7)--KIR(1).-', '-.KTAER(1)--PVFQLLEKQILSR(8).-', '-.KI…
24	101	-1231.76	S_00446	-.HKILFDR(2)--VVAAEEKNGVVFIR(7).-', '-.GEGVGAYNPQLNLKNVQR(14)--VVAAEEKNGVVFIR(7).-', '-.DMAKDYMER(4)--KTAER(1).-', '-.DWIKGWR(4)--WSKYK(3).-', '-.KTAER(1)--DYAAIVEQNLQHFKPVFQLLEK(14).-', '-.FSDKR(4)--KTAER(1).-', '-.HKILFDR(2)--GEGVGAYNPQLNLKNVQR(14).-', '-.KIR(1)--YKFVDAVPDIFAQIEVNEK(2).-', '-.KTAER(1)--DMAKDYMER(4).-', '-.AQILAQKELPIDEDEEMK(7)--KIR(1).-', '-.KTAER(1)--PVFQLLEKQILSR(8).-', '-.KI…
24	101	-1224.1	S_01093	-.HKILFDR(2)--VVAAEEKNGVVFIR(7).-', '-.GEGVGAYNPQLNLKNVQR(14)--VVAAEEKNGVVFIR(7).-', '-.DMAKDYMER(4)--KTAER(1).-', '-.DWIKGWR(4)--WSKYK(3).-', '-.KTAER(1)--DYAAIVEQNLQHFKPVFQLLEK(14).-', '-.FSDKR(4)--KTAER(1).-', '-.HKILFDR(2)--GEGVGAYNPQLNLKNVQR(14).-', '-.KIR(1)--YKFVDAVPDIFAQIEVNEK(2).-', '-.KTAER(1)--DMAKDYMER(4).-', '-.AQILAQKELPIDEDEEMK(7)--KIR(1).-', '-.KTAER(1)--PVFQLLEKQILSR(8).-', '-.KI…
24	101	-1221.81	S_02621	-.HKILFDR(2)--VVAAEEKNGVVFIR(7).-', '-.GEGVGAYNPQLNLKNVQR(14)--VVAAEEKNGVVFIR(7).-', '-.DMAKDYMER(4)--KTAER(1).-', '-.DWIKGWR(4)--WSKYK(3).-', '-.KTAER(1)--DYAAIVEQNLQHFKPVFQLLEK(14).-', '-.FSDKR(4)--KTAER(1).-', '-.HKILFDR(2)--GEGVGAYNPQLNLKNVQR(14).-', '-.KIR(1)--YKFVDAVPDIFAQIEVNEK(2).-', '-.KTAER(1)--DMAKDYMER(4).-', '-.AQILAQKELPIDEDEEMK(7)--KIR(1).-', '-.KTAER(1)--PVFQLLEKQILSR(8).-', '-.KI…
24	101	-1203.44	S_02632	-.HKILFDR(2)--VVAAEEKNGVVFIR(7).-', '-.GEGVGAYNPQLNLKNVQR(14)--VVAAEEKNGVVFIR(7).-', '-.DMAKDYMER(4)--KTAER(1).-', '-.DWIKGWR(4)--WSKYK(3).-', '-.KTAER(1)--DYAAIVEQNLQHFKPVFQLLEK(14).-', '-.FSDKR(4)--KTAER(1).-', '-.HKILFDR(2)--GEGVGAYNPQLNLKNVQR(14).-', '-.KIR(1)--YKFVDAVPDIFAQIEVNEK(2).-', '-.KTAER(1)--DMAKDYMER(4).-', '-.AQILAQKELPIDEDEEMK(7)--KIR(1).-', '-.KTAER(1)--PVFQLLEKQILSR(8).-', '-.KI…
24	101	-1168.96	S_02325	-.HKILFDR(2)--VVAAEEKNGVVFIR(7).-', '-.GEGVGAYNPQLNLKNVQR(14)--VVAAEEKNGVVFIR(7).-', '-.DMAKDYMER(4)--KTAER(1).-', '-.DWIKGWR(4)--WSKYK(3).-', '-.KTAER(1)--DYAAIVEQNLQHFKPVFQLLEK(14).-', '-.FSDKR(4)--KTAER(1).-', '-.HKILFDR(2)--GEGVGAYNPQLNLKNVQR(14).-', '-.KIR(1)--YKFVDAVPDIFAQIEVNEK(2).-', '-.KTAER(1)--DMAKDYMER(4).-', '-.AQILAQKELPIDEDEEMK(7)--KIR(1).-', '-.KTAER(1)--PVFQLLEKQILSR(8).-', '-.KI…
24	100	-1301.09	S_00897	-.HKILFDR(2)--VVAAEEKNGVVFIR(7).-', '-.GEGVGAYNPQLNLKNVQR(14)--VVAAEEKNGVVFIR(7).-', '-.DMAKDYMER(4)--KTAER(1).-', '-.DWIKGWR(4)--WSKYK(3).-', '-.KTAER(1)--DYAAIVEQNLQHFKPVFQLLEK(14).-', '-.FSDKR(4)--KTAER(1).-', '-.HKILFDR(2)--GEGVGAYNPQLNLKNVQR(14).-', '-.KIR(1)--YKFVDAVPDIFAQIEVNEK(2).-', '-.KTAER(1)--DMAKDYMER(4).-', '-.AQILAQKELPIDEDEEMK(7)--KIR(1).-', '-.KTAER(1)--PVFQLLEKQILSR(8).-', '-.KI…
24	100	-1290.76	S_00244	-.HKILFDR(2)--VVAAEEKNGVVFIR(7).-', '-.GEGVGAYNPQLNLKNVQR(14)--VVAAEEKNGVVFIR(7).-', '-.DMAKDYMER(4)--KTAER(1).-', '-.DWIKGWR(4)--WSKYK(3).-', '-.KTAER(1)--DYAAIVEQNLQHFKPVFQLLEK(14).-', '-.FSDKR(4)--KTAER(1).-', '-.HKILFDR(2)--GEGVGAYNPQLNLKNVQR(14).-', '-.KIR(1)--YKFVDAVPDIFAQIEVNEK(2).-', '-.KTAER(1)--DMAKDYMER(4).-', '-.AQILAQKELPIDEDEEMK(7)--KIR(1).-', '-.KTAER(1)--PVFQLLEKQILSR(8).-', '-.KI…
24	100	-1283.33	S_02722	-.HKILFDR(2)--VVAAEEKNGVVFIR(7).-', '-.GEGVGAYNPQLNLKNVQR(14)--VVAAEEKNGVVFIR(7).-', '-.DMAKDYMER(4)--KTAER(1).-', '-.DWIKGWR(4)--WSKYK(3).-', '-.KTAER(1)--DYAAIVEQNLQHFKPVFQLLEK(14).-', '-.FSDKR(4)--KTAER(1).-', '-.HKILFDR(2)--GEGVGAYNPQLNLKNVQR(14).-', '-.KIR(1)--YKFVDAVPDIFAQIEVNEK(2).-', '-.KTAER(1)--DMAKDYMER(4).-', '-.AQILAQKELPIDEDEEMK(7)--KIR(1).-', '-.KTAER(1)--PVFQLLEKQILSR(8).-', '-.KI…
24	100	-1277.19	S_00144	-.HKILFDR(2)--VVAAEEKNGVVFIR(7).-', '-.GEGVGAYNPQLNLKNVQR(14)--VVAAEEKNGVVFIR(7).-', '-.DMAKDYMER(4)--KTAER(1).-', '-.DWIKGWR(4)--WSKYK(3).-', '-.KTAER(1)--DYAAIVEQNLQHFKPVFQLLEK(14).-', '-.FSDKR(4)--KTAER(1).-', '-.HKILFDR(2)--GEGVGAYNPQLNLKNVQR(14).-', '-.KIR(1)--YKFVDAVPDIFAQIEVNEK(2).-', '-.KTAER(1)--DMAKDYMER(4).-', '-.AQILAQKELPIDEDEEMK(7)--KIR(1).-', '-.KTAER(1)--PVFQLLEKQILSR(8).-', '-.KI…
24	100	-1246.65	S_01394	-.HKILFDR(2)--VVAAEEKNGVVFIR(7).-', '-.GEGVGAYNPQLNLKNVQR(14)--VVAAEEKNGVVFIR(7).-', '-.DMAKDYMER(4)--KTAER(1).-', '-.DWIKGWR(4)--WSKYK(3).-', '-.KTAER(1)--DYAAIVEQNLQHFKPVFQLLEK(14).-', '-.FSDKR(4)--KTAER(1).-', '-.HKILFDR(2)--GEGVGAYNPQLNLKNVQR(14).-', '-.KIR(1)--YKFVDAVPDIFAQIEVNEK(2).-', '-.KTAER(1)--DMAKDYMER(4).-', '-.AQILAQKELPIDEDEEMK(7)--KIR(1).-', '-.KTAER(1)--PVFQLLEKQILSR(8).-', '-.KI…
24	100	-1240.5	S_01616	-.HKILFDR(2)--VVAAEEKNGVVFIR(7).-', '-.GEGVGAYNPQLNLKNVQR(14)--VVAAEEKNGVVFIR(7).-', '-.DMAKDYMER(4)--KTAER(1).-', '-.DWIKGWR(4)--WSKYK(3).-', '-.KTAER(1)--DYAAIVEQNLQHFKPVFQLLEK(14).-', '-.FSDKR(4)--KTAER(1).-', '-.HKILFDR(2)--GEGVGAYNPQLNLKNVQR(14).-', '-.KIR(1)--YKFVDAVPDIFAQIEVNEK(2).-', '-.KTAER(1)--DMAKDYMER(4).-', '-.AQILAQKELPIDEDEEMK(7)--KIR(1).-', '-.KTAER(1)--PVFQLLEKQILSR(8).-', '-.KI…
24	100	-1226.15	S_00316	-.HKILFDR(2)--VVAAEEKNGVVFIR(7).-', '-.GEGVGAYNPQLNLKNVQR(14)--VVAAEEKNGVVFIR(7).-', '-.DMAKDYMER(4)--KTAER(1).-', '-.DWIKGWR(4)--WSKYK(3).-', '-.KTAER(1)--DYAAIVEQNLQHFKPVFQLLEK(14).-', '-.FSDKR(4)--KTAER(1).-', '-.HKILFDR(2)--GEGVGAYNPQLNLKNVQR(14).-', '-.KIR(1)--YKFVDAVPDIFAQIEVNEK(2).-', '-.KTAER(1)--DMAKDYMER(4).-', '-.AQILAQKELPIDEDEEMK(7)--KIR(1).-', '-.KTAER(1)--PVFQLLEKQILSR(8).-', '-.KI…
24	100	-1210.69	S_01136	-.HKILFDR(2)--VVAAEEKNGVVFIR(7).-', '-.GEGVGAYNPQLNLKNVQR(14)--VVAAEEKNGVVFIR(7).-', '-.DMAKDYMER(4)--KTAER(1).-', '-.DWIKGWR(4)--WSKYK(3).-', '-.KTAER(1)--DYAAIVEQNLQHFKPVFQLLEK(14).-', '-.FSDKR(4)--KTAER(1).-', '-.HKILFDR(2)--GEGVGAYNPQLNLKNVQR(14).-', '-.KIR(1)--YKFVDAVPDIFAQIEVNEK(2).-', '-.KTAER(1)--DMAKDYMER(4).-', '-.AQILAQKELPIDEDEEMK(7)--KIR(1).-', '-.KTAER(1)--PVFQLLEKQILSR(8).-', '-.KI…
24	100	-1195.17	S_00565	-.HKILFDR(2)--VVAAEEKNGVVFIR(7).-', '-.GEGVGAYNPQLNLKNVQR(14)--VVAAEEKNGVVFIR(7).-', '-.DMAKDYMER(4)--KTAER(1).-', '-.DWIKGWR(4)--WSKYK(3).-', '-.KTAER(1)--DYAAIVEQNLQHFKPVFQLLEK(14).-', '-.FSDKR(4)--KTAER(1).-', '-.HKILFDR(2)--GEGVGAYNPQLNLKNVQR(14).-', '-.KIR(1)--YKFVDAVPDIFAQIEVNEK(2).-', '-.KTAER(1)--DMAKDYMER(4).-', '-.AQILAQKELPIDEDEEMK(7)--KIR(1).-', '-.KTAER(1)--PVFQLLEKQILSR(8).-', '-.KI…
24	99	-1307.98	S_00568	-.HKILFDR(2)--VVAAEEKNGVVFIR(7).-', '-.GEGVGAYNPQLNLKNVQR(14)--VVAAEEKNGVVFIR(7).-', '-.DMAKDYMER(4)--KTAER(1).-', '-.DWIKGWR(4)--WSKYK(3).-', '-.KTAER(1)--DYAAIVEQNLQHFKPVFQLLEK(14).-', '-.FSDKR(4)--KTAER(1).-', '-.HKILFDR(2)--GEGVGAYNPQLNLKNVQR(14).-', '-.KIR(1)--YKFVDAVPDIFAQIEVNEK(2).-', '-.KTAER(1)--DMAKDYMER(4).-', '-.AQILAQKELPIDEDEEMK(7)--KIR(1).-', '-.KTAER(1)--PVFQLLEKQILSR(8).-', '-.KI…
24	99	-1273.51	S_02090	-.HKILFDR(2)--VVAAEEKNGVVFIR(7).-', '-.GEGVGAYNPQLNLKNVQR(14)--VVAAEEKNGVVFIR(7).-', '-.DMAKDYMER(4)--KTAER(1).-', '-.DWIKGWR(4)--WSKYK(3).-', '-.KTAER(1)--DYAAIVEQNLQHFKPVFQLLEK(14).-', '-.FSDKR(4)--KTAER(1).-', '-.HKILFDR(2)--GEGVGAYNPQLNLKNVQR(14).-', '-.KIR(1)--YKFVDAVPDIFAQIEVNEK(2).-', '-.KTAER(1)--DMAKDYMER(4).-', '-.AQILAQKELPIDEDEEMK(7)--KIR(1).-', '-.KTAER(1)--PVFQLLEKQILSR(8).-', '-.KI…
24	99	-1268.89	S_00292	-.HKILFDR(2)--VVAAEEKNGVVFIR(7).-', '-.GEGVGAYNPQLNLKNVQR(14)--VVAAEEKNGVVFIR(7).-', '-.DMAKDYMER(4)--KTAER(1).-', '-.DWIKGWR(4)--WSKYK(3).-', '-.KTAER(1)--DYAAIVEQNLQHFKPVFQLLEK(14).-', '-.FSDKR(4)--KTAER(1).-', '-.HKILFDR(2)--GEGVGAYNPQLNLKNVQR(14).-', '-.KIR(1)--YKFVDAVPDIFAQIEVNEK(2).-', '-.KTAER(1)--DMAKDYMER(4).-', '-.AQILAQKELPIDEDEEMK(7)--KIR(1).-', '-.KTAER(1)--PVFQLLEKQILSR(8).-', '-.KI…
24	99	-1266.44	S_02481	-.HKILFDR(2)--VVAAEEKNGVVFIR(7).-', '-.GEGVGAYNPQLNLKNVQR(14)--VVAAEEKNGVVFIR(7).-', '-.DMAKDYMER(4)--KTAER(1).-', '-.DWIKGWR(4)--WSKYK(3).-', '-.KTAER(1)--DYAAIVEQNLQHFKPVFQLLEK(14).-', '-.FSDKR(4)--KTAER(1).-', '-.HKILFDR(2)--GEGVGAYNPQLNLKNVQR(14).-', '-.KIR(1)--YKFVDAVPDIFAQIEVNEK(2).-', '-.KTAER(1)--DMAKDYMER(4).-', '-.AQILAQKELPIDEDEEMK(7)--KIR(1).-', '-.KTAER(1)--PVFQLLEKQILSR(8).-', '-.KI…
24	99	-1255.69	S_01712	-.HKILFDR(2)--VVAAEEKNGVVFIR(7).-', '-.GEGVGAYNPQLNLKNVQR(14)--VVAAEEKNGVVFIR(7).-', '-.DMAKDYMER(4)--KTAER(1).-', '-.DWIKGWR(4)--WSKYK(3).-', '-.KTAER(1)--DYAAIVEQNLQHFKPVFQLLEK(14).-', '-.FSDKR(4)--KTAER(1).-', '-.HKILFDR(2)--GEGVGAYNPQLNLKNVQR(14).-', '-.KIR(1)--YKFVDAVPDIFAQIEVNEK(2).-', '-.KTAER(1)--DMAKDYMER(4).-', '-.AQILAQKELPIDEDEEMK(7)--KIR(1).-', '-.KTAER(1)--PVFQLLEKQILSR(8).-', '-.KI…
24	99	-1247.09	S_01059	-.HKILFDR(2)--VVAAEEKNGVVFIR(7).-', '-.GEGVGAYNPQLNLKNVQR(14)--VVAAEEKNGVVFIR(7).-', '-.DMAKDYMER(4)--KTAER(1).-', '-.DWIKGWR(4)--WSKYK(3).-', '-.KTAER(1)--DYAAIVEQNLQHFKPVFQLLEK(14).-', '-.FSDKR(4)--KTAER(1).-', '-.HKILFDR(2)--GEGVGAYNPQLNLKNVQR(14).-', '-.KIR(1)--YKFVDAVPDIFAQIEVNEK(2).-', '-.KTAER(1)--DMAKDYMER(4).-', '-.AQILAQKELPIDEDEEMK(7)--KIR(1).-', '-.KTAER(1)--PVFQLLEKQILSR(8).-', '-.KI…
24	99	-1238.68	S_01151	-.HKILFDR(2)--VVAAEEKNGVVFIR(7).-', '-.GEGVGAYNPQLNLKNVQR(14)--VVAAEEKNGVVFIR(7).-', '-.DMAKDYMER(4)--KTAER(1).-', '-.DWIKGWR(4)--WSKYK(3).-', '-.KTAER(1)--DYAAIVEQNLQHFKPVFQLLEK(14).-', '-.FSDKR(4)--KTAER(1).-', '-.HKILFDR(2)--GEGVGAYNPQLNLKNVQR(14).-', '-.KIR(1)--YKFVDAVPDIFAQIEVNEK(2).-', '-.KTAER(1)--DMAKDYMER(4).-', '-.AQILAQKELPIDEDEEMK(7)--KIR(1).-', '-.KTAER(1)--PVFQLLEKQILSR(8).-', '-.KI…
24	99	-1235.55	S_01263	-.HKILFDR(2)--VVAAEEKNGVVFIR(7).-', '-.GEGVGAYNPQLNLKNVQR(14)--VVAAEEKNGVVFIR(7).-', '-.DMAKDYMER(4)--KTAER(1).-', '-.DWIKGWR(4)--WSKYK(3).-', '-.KTAER(1)--DYAAIVEQNLQHFKPVFQLLEK(14).-', '-.FSDKR(4)--KTAER(1).-', '-.HKILFDR(2)--GEGVGAYNPQLNLKNVQR(14).-', '-.KIR(1)--YKFVDAVPDIFAQIEVNEK(2).-', '-.KTAER(1)--DMAKDYMER(4).-', '-.AQILAQKELPIDEDEEMK(7)--KIR(1).-', '-.KTAER(1)--PVFQLLEKQILSR(8).-', '-.KI…
24	99	-1235.34	S_01853	-.HKILFDR(2)--VVAAEEKNGVVFIR(7).-', '-.GEGVGAYNPQLNLKNVQR(14)--VVAAEEKNGVVFIR(7).-', '-.DMAKDYMER(4)--KTAER(1).-', '-.DWIKGWR(4)--WSKYK(3).-', '-.KTAER(1)--DYAAIVEQNLQHFKPVFQLLEK(14).-', '-.FSDKR(4)--KTAER(1).-', '-.HKILFDR(2)--GEGVGAYNPQLNLKNVQR(14).-', '-.KIR(1)--YKFVDAVPDIFAQIEVNEK(2).-', '-.KTAER(1)--DMAKDYMER(4).-', '-.AQILAQKELPIDEDEEMK(7)--KIR(1).-', '-.KTAER(1)--PVFQLLEKQILSR(8).-', '-.KI…
24	99	-1234.17	S_02834	-.HKILFDR(2)--VVAAEEKNGVVFIR(7).-', '-.GEGVGAYNPQLNLKNVQR(14)--VVAAEEKNGVVFIR(7).-', '-.DMAKDYMER(4)--KTAER(1).-', '-.DWIKGWR(4)--WSKYK(3).-', '-.KTAER(1)--DYAAIVEQNLQHFKPVFQLLEK(14).-', '-.FSDKR(4)--KTAER(1).-', '-.HKILFDR(2)--GEGVGAYNPQLNLKNVQR(14).-', '-.KIR(1)--YKFVDAVPDIFAQIEVNEK(2).-', '-.KTAER(1)--DMAKDYMER(4).-', '-.AQILAQKELPIDEDEEMK(7)--KIR(1).-', '-.KTAER(1)--PVFQLLEKQILSR(8).-', '-.KI…
24	99	-1206.27	S_01602	-.HKILFDR(2)--VVAAEEKNGVVFIR(7).-', '-.GEGVGAYNPQLNLKNVQR(14)--VVAAEEKNGVVFIR(7).-', '-.DMAKDYMER(4)--KTAER(1).-', '-.DWIKGWR(4)--WSKYK(3).-', '-.KTAER(1)--DYAAIVEQNLQHFKPVFQLLEK(14).-', '-.FSDKR(4)--KTAER(1).-', '-.HKILFDR(2)--GEGVGAYNPQLNLKNVQR(14).-', '-.KIR(1)--YKFVDAVPDIFAQIEVNEK(2).-', '-.KTAER(1)--DMAKDYMER(4).-', '-.AQILAQKELPIDEDEEMK(7)--KIR(1).-', '-.KTAER(1)--PVFQLLEKQILSR(8).-', '-.KI…
24	99	-1194.04	S_00870	-.HKILFDR(2)--VVAAEEKNGVVFIR(7).-', '-.GEGVGAYNPQLNLKNVQR(14)--VVAAEEKNGVVFIR(7).-', '-.DMAKDYMER(4)--KTAER(1).-', '-.DWIKGWR(4)--WSKYK(3).-', '-.KTAER(1)--DYAAIVEQNLQHFKPVFQLLEK(14).-', '-.FSDKR(4)--KTAER(1).-', '-.HKILFDR(2)--GEGVGAYNPQLNLKNVQR(14).-', '-.KIR(1)--YKFVDAVPDIFAQIEVNEK(2).-', '-.KTAER(1)--DMAKDYMER(4).-', '-.AQILAQKELPIDEDEEMK(7)--KIR(1).-', '-.KTAER(1)--PVFQLLEKQILSR(8).-', '-.KI…
24	99	-1185.71	S_00256	-.HKILFDR(2)--VVAAEEKNGVVFIR(7).-', '-.GEGVGAYNPQLNLKNVQR(14)--VVAAEEKNGVVFIR(7).-', '-.DMAKDYMER(4)--KTAER(1).-', '-.DWIKGWR(4)--WSKYK(3).-', '-.KTAER(1)--DYAAIVEQNLQHFKPVFQLLEK(14).-', '-.FSDKR(4)--KTAER(1).-', '-.HKILFDR(2)--GEGVGAYNPQLNLKNVQR(14).-', '-.KIR(1)--YKFVDAVPDIFAQIEVNEK(2).-', '-.KTAER(1)--DMAKDYMER(4).-', '-.AQILAQKELPIDEDEEMK(7)--KIR(1).-', '-.KTAER(1)--PVFQLLEKQILSR(8).-', '-.KI…
24	99	-1181.22	S_00864	-.HKILFDR(2)--VVAAEEKNGVVFIR(7).-', '-.GEGVGAYNPQLNLKNVQR(14)--VVAAEEKNGVVFIR(7).-', '-.DMAKDYMER(4)--KTAER(1).-', '-.DWIKGWR(4)--WSKYK(3).-', '-.KTAER(1)--DYAAIVEQNLQHFKPVFQLLEK(14).-', '-.FSDKR(4)--KTAER(1).-', '-.HKILFDR(2)--GEGVGAYNPQLNLKNVQR(14).-', '-.KIR(1)--YKFVDAVPDIFAQIEVNEK(2).-', '-.KTAER(1)--DMAKDYMER(4).-', '-.AQILAQKELPIDEDEEMK(7)--KIR(1).-', '-.KTAER(1)--PVFQLLEKQILSR(8).-', '-.KI…
24	98	-1274.67	S_02048	-.HKILFDR(2)--VVAAEEKNGVVFIR(7).-', '-.GEGVGAYNPQLNLKNVQR(14)--VVAAEEKNGVVFIR(7).-', '-.DMAKDYMER(4)--KTAER(1).-', '-.DWIKGWR(4)--WSKYK(3).-', '-.KTAER(1)--DYAAIVEQNLQHFKPVFQLLEK(14).-', '-.FSDKR(4)--KTAER(1).-', '-.HKILFDR(2)--GEGVGAYNPQLNLKNVQR(14).-', '-.KIR(1)--YKFVDAVPDIFAQIEVNEK(2).-', '-.KTAER(1)--DMAKDYMER(4).-', '-.AQILAQKELPIDEDEEMK(7)--KIR(1).-', '-.KTAER(1)--PVFQLLEKQILSR(8).-', '-.KI…
24	98	-1270.16	S_02975	-.HKILFDR(2)--VVAAEEKNGVVFIR(7).-', '-.GEGVGAYNPQLNLKNVQR(14)--VVAAEEKNGVVFIR(7).-', '-.DMAKDYMER(4)--KTAER(1).-', '-.DWIKGWR(4)--WSKYK(3).-', '-.KTAER(1)--DYAAIVEQNLQHFKPVFQLLEK(14).-', '-.FSDKR(4)--KTAER(1).-', '-.HKILFDR(2)--GEGVGAYNPQLNLKNVQR(14).-', '-.KIR(1)--YKFVDAVPDIFAQIEVNEK(2).-', '-.KTAER(1)--DMAKDYMER(4).-', '-.AQILAQKELPIDEDEEMK(7)--KIR(1).-', '-.KTAER(1)--PVFQLLEKQILSR(8).-', '-.KI…
24	98	-1265.79	S_00180	-.HKILFDR(2)--VVAAEEKNGVVFIR(7).-', '-.GEGVGAYNPQLNLKNVQR(14)--VVAAEEKNGVVFIR(7).-', '-.DMAKDYMER(4)--KTAER(1).-', '-.DWIKGWR(4)--WSKYK(3).-', '-.KTAER(1)--DYAAIVEQNLQHFKPVFQLLEK(14).-', '-.FSDKR(4)--KTAER(1).-', '-.HKILFDR(2)--GEGVGAYNPQLNLKNVQR(14).-', '-.KIR(1)--YKFVDAVPDIFAQIEVNEK(2).-', '-.KTAER(1)--DMAKDYMER(4).-', '-.AQILAQKELPIDEDEEMK(7)--KIR(1).-', '-.KTAER(1)--PVFQLLEKQILSR(8).-', '-.KI…
24	98	-1263.14	S_02200	-.HKILFDR(2)--VVAAEEKNGVVFIR(7).-', '-.GEGVGAYNPQLNLKNVQR(14)--VVAAEEKNGVVFIR(7).-', '-.DMAKDYMER(4)--KTAER(1).-', '-.DWIKGWR(4)--WSKYK(3).-', '-.KTAER(1)--DYAAIVEQNLQHFKPVFQLLEK(14).-', '-.FSDKR(4)--KTAER(1).-', '-.HKILFDR(2)--GEGVGAYNPQLNLKNVQR(14).-', '-.KIR(1)--YKFVDAVPDIFAQIEVNEK(2).-', '-.KTAER(1)--DMAKDYMER(4).-', '-.AQILAQKELPIDEDEEMK(7)--KIR(1).-', '-.KTAER(1)--PVFQLLEKQILSR(8).-', '-.KI…
24	98	-1235.6	S_00699	-.HKILFDR(2)--VVAAEEKNGVVFIR(7).-', '-.GEGVGAYNPQLNLKNVQR(14)--VVAAEEKNGVVFIR(7).-', '-.DMAKDYMER(4)--KTAER(1).-', '-.DWIKGWR(4)--WSKYK(3).-', '-.KTAER(1)--DYAAIVEQNLQHFKPVFQLLEK(14).-', '-.FSDKR(4)--KTAER(1).-', '-.HKILFDR(2)--GEGVGAYNPQLNLKNVQR(14).-', '-.KIR(1)--YKFVDAVPDIFAQIEVNEK(2).-', '-.KTAER(1)--DMAKDYMER(4).-', '-.AQILAQKELPIDEDEEMK(7)--KIR(1).-', '-.KTAER(1)--PVFQLLEKQILSR(8).-', '-.KI…
24	98	-1232.62	S_02919	-.HKILFDR(2)--VVAAEEKNGVVFIR(7).-', '-.GEGVGAYNPQLNLKNVQR(14)--VVAAEEKNGVVFIR(7).-', '-.DMAKDYMER(4)--KTAER(1).-', '-.DWIKGWR(4)--WSKYK(3).-', '-.KTAER(1)--DYAAIVEQNLQHFKPVFQLLEK(14).-', '-.FSDKR(4)--KTAER(1).-', '-.HKILFDR(2)--GEGVGAYNPQLNLKNVQR(14).-', '-.KIR(1)--YKFVDAVPDIFAQIEVNEK(2).-', '-.KTAER(1)--DMAKDYMER(4).-', '-.AQILAQKELPIDEDEEMK(7)--KIR(1).-', '-.KTAER(1)--PVFQLLEKQILSR(8).-', '-.KI…
24	97	-1291.73	S_02368	-.HKILFDR(2)--VVAAEEKNGVVFIR(7).-', '-.GEGVGAYNPQLNLKNVQR(14)--VVAAEEKNGVVFIR(7).-', '-.DMAKDYMER(4)--KTAER(1).-', '-.DWIKGWR(4)--WSKYK(3).-', '-.KTAER(1)--DYAAIVEQNLQHFKPVFQLLEK(14).-', '-.FSDKR(4)--KTAER(1).-', '-.HKILFDR(2)--GEGVGAYNPQLNLKNVQR(14).-', '-.KIR(1)--YKFVDAVPDIFAQIEVNEK(2).-', '-.KTAER(1)--DMAKDYMER(4).-', '-.AQILAQKELPIDEDEEMK(7)--KIR(1).-', '-.KTAER(1)--PVFQLLEKQILSR(8).-', '-.KI…
24	97	-1272.33	S_01214	-.HKILFDR(2)--VVAAEEKNGVVFIR(7).-', '-.GEGVGAYNPQLNLKNVQR(14)--VVAAEEKNGVVFIR(7).-', '-.DMAKDYMER(4)--KTAER(1).-', '-.DWIKGWR(4)--WSKYK(3).-', '-.KTAER(1)--DYAAIVEQNLQHFKPVFQLLEK(14).-', '-.FSDKR(4)--KTAER(1).-', '-.HKILFDR(2)--GEGVGAYNPQLNLKNVQR(14).-', '-.KIR(1)--YKFVDAVPDIFAQIEVNEK(2).-', '-.KTAER(1)--DMAKDYMER(4).-', '-.AQILAQKELPIDEDEEMK(7)--KIR(1).-', '-.KTAER(1)--PVFQLLEKQILSR(8).-', '-.KI…
24	97	-1262.46	S_00450	-.HKILFDR(2)--VVAAEEKNGVVFIR(7).-', '-.GEGVGAYNPQLNLKNVQR(14)--VVAAEEKNGVVFIR(7).-', '-.DMAKDYMER(4)--KTAER(1).-', '-.DWIKGWR(4)--WSKYK(3).-', '-.KTAER(1)--DYAAIVEQNLQHFKPVFQLLEK(14).-', '-.FSDKR(4)--KTAER(1).-', '-.HKILFDR(2)--GEGVGAYNPQLNLKNVQR(14).-', '-.KIR(1)--YKFVDAVPDIFAQIEVNEK(2).-', '-.KTAER(1)--DMAKDYMER(4).-', '-.AQILAQKELPIDEDEEMK(7)--KIR(1).-', '-.KTAER(1)--PVFQLLEKQILSR(8).-', '-.KI…
24	97	-1260.39	S_01892	-.HKILFDR(2)--VVAAEEKNGVVFIR(7).-', '-.GEGVGAYNPQLNLKNVQR(14)--VVAAEEKNGVVFIR(7).-', '-.DMAKDYMER(4)--KTAER(1).-', '-.DWIKGWR(4)--WSKYK(3).-', '-.KTAER(1)--DYAAIVEQNLQHFKPVFQLLEK(14).-', '-.FSDKR(4)--KTAER(1).-', '-.HKILFDR(2)--GEGVGAYNPQLNLKNVQR(14).-', '-.KIR(1)--YKFVDAVPDIFAQIEVNEK(2).-', '-.KTAER(1)--DMAKDYMER(4).-', '-.AQILAQKELPIDEDEEMK(7)--KIR(1).-', '-.KTAER(1)--PVFQLLEKQILSR(8).-', '-.KI…
24	97	-1245.27	S_02087	-.HKILFDR(2)--VVAAEEKNGVVFIR(7).-', '-.GEGVGAYNPQLNLKNVQR(14)--VVAAEEKNGVVFIR(7).-', '-.DMAKDYMER(4)--KTAER(1).-', '-.DWIKGWR(4)--WSKYK(3).-', '-.KTAER(1)--DYAAIVEQNLQHFKPVFQLLEK(14).-', '-.FSDKR(4)--KTAER(1).-', '-.HKILFDR(2)--GEGVGAYNPQLNLKNVQR(14).-', '-.KIR(1)--YKFVDAVPDIFAQIEVNEK(2).-', '-.KTAER(1)--DMAKDYMER(4).-', '-.AQILAQKELPIDEDEEMK(7)--KIR(1).-', '-.KTAER(1)--PVFQLLEKQILSR(8).-', '-.KI…
24	97	-1237.44	S_02401	-.HKILFDR(2)--VVAAEEKNGVVFIR(7).-', '-.GEGVGAYNPQLNLKNVQR(14)--VVAAEEKNGVVFIR(7).-', '-.DMAKDYMER(4)--KTAER(1).-', '-.DWIKGWR(4)--WSKYK(3).-', '-.KTAER(1)--DYAAIVEQNLQHFKPVFQLLEK(14).-', '-.FSDKR(4)--KTAER(1).-', '-.HKILFDR(2)--GEGVGAYNPQLNLKNVQR(14).-', '-.KIR(1)--YKFVDAVPDIFAQIEVNEK(2).-', '-.KTAER(1)--DMAKDYMER(4).-', '-.AQILAQKELPIDEDEEMK(7)--KIR(1).-', '-.KTAER(1)--PVFQLLEKQILSR(8).-', '-.KI…
24	97	-1225.45	S_00637	-.HKILFDR(2)--VVAAEEKNGVVFIR(7).-', '-.GEGVGAYNPQLNLKNVQR(14)--VVAAEEKNGVVFIR(7).-', '-.DMAKDYMER(4)--KTAER(1).-', '-.DWIKGWR(4)--WSKYK(3).-', '-.KTAER(1)--DYAAIVEQNLQHFKPVFQLLEK(14).-', '-.FSDKR(4)--KTAER(1).-', '-.HKILFDR(2)--GEGVGAYNPQLNLKNVQR(14).-', '-.KIR(1)--YKFVDAVPDIFAQIEVNEK(2).-', '-.KTAER(1)--DMAKDYMER(4).-', '-.AQILAQKELPIDEDEEMK(7)--KIR(1).-', '-.KTAER(1)--PVFQLLEKQILSR(8).-', '-.KI…
24	97	-1223.93	S_02595	-.HKILFDR(2)--VVAAEEKNGVVFIR(7).-', '-.GEGVGAYNPQLNLKNVQR(14)--VVAAEEKNGVVFIR(7).-', '-.DMAKDYMER(4)--KTAER(1).-', '-.DWIKGWR(4)--WSKYK(3).-', '-.KTAER(1)--DYAAIVEQNLQHFKPVFQLLEK(14).-', '-.FSDKR(4)--KTAER(1).-', '-.HKILFDR(2)--GEGVGAYNPQLNLKNVQR(14).-', '-.KIR(1)--YKFVDAVPDIFAQIEVNEK(2).-', '-.KTAER(1)--DMAKDYMER(4).-', '-.AQILAQKELPIDEDEEMK(7)--KIR(1).-', '-.KTAER(1)--PVFQLLEKQILSR(8).-', '-.KI…
24	97	-1141.64	S_01789	-.HKILFDR(2)--VVAAEEKNGVVFIR(7).-', '-.GEGVGAYNPQLNLKNVQR(14)--VVAAEEKNGVVFIR(7).-', '-.DMAKDYMER(4)--KTAER(1).-', '-.DWIKGWR(4)--WSKYK(3).-', '-.KTAER(1)--DYAAIVEQNLQHFKPVFQLLEK(14).-', '-.FSDKR(4)--KTAER(1).-', '-.HKILFDR(2)--GEGVGAYNPQLNLKNVQR(14).-', '-.KIR(1)--YKFVDAVPDIFAQIEVNEK(2).-', '-.KTAER(1)--DMAKDYMER(4).-', '-.AQILAQKELPIDEDEEMK(7)--KIR(1).-', '-.KTAER(1)--PVFQLLEKQILSR(8).-', '-.KI…
24	96	-1292.7	S_02203	-.HKILFDR(2)--VVAAEEKNGVVFIR(7).-', '-.GEGVGAYNPQLNLKNVQR(14)--VVAAEEKNGVVFIR(7).-', '-.DMAKDYMER(4)--KTAER(1).-', '-.DWIKGWR(4)--WSKYK(3).-', '-.KTAER(1)--DYAAIVEQNLQHFKPVFQLLEK(14).-', '-.FSDKR(4)--KTAER(1).-', '-.HKILFDR(2)--GEGVGAYNPQLNLKNVQR(14).-', '-.KIR(1)--YKFVDAVPDIFAQIEVNEK(2).-', '-.KTAER(1)--DMAKDYMER(4).-', '-.AQILAQKELPIDEDEEMK(7)--KIR(1).-', '-.KTAER(1)--PVFQLLEKQILSR(8).-', '-.KI…
24	96	-1246.11	S_01928	-.HKILFDR(2)--VVAAEEKNGVVFIR(7).-', '-.GEGVGAYNPQLNLKNVQR(14)--VVAAEEKNGVVFIR(7).-', '-.DMAKDYMER(4)--KTAER(1).-', '-.DWIKGWR(4)--WSKYK(3).-', '-.KTAER(1)--DYAAIVEQNLQHFKPVFQLLEK(14).-', '-.FSDKR(4)--KTAER(1).-', '-.HKILFDR(2)--GEGVGAYNPQLNLKNVQR(14).-', '-.KIR(1)--YKFVDAVPDIFAQIEVNEK(2).-', '-.KTAER(1)--DMAKDYMER(4).-', '-.AQILAQKELPIDEDEEMK(7)--KIR(1).-', '-.KTAER(1)--PVFQLLEKQILSR(8).-', '-.KI…
24	96	-1219.06	S_00282	-.HKILFDR(2)--VVAAEEKNGVVFIR(7).-', '-.GEGVGAYNPQLNLKNVQR(14)--VVAAEEKNGVVFIR(7).-', '-.DMAKDYMER(4)--KTAER(1).-', '-.DWIKGWR(4)--WSKYK(3).-', '-.KTAER(1)--DYAAIVEQNLQHFKPVFQLLEK(14).-', '-.FSDKR(4)--KTAER(1).-', '-.HKILFDR(2)--GEGVGAYNPQLNLKNVQR(14).-', '-.KIR(1)--YKFVDAVPDIFAQIEVNEK(2).-', '-.KTAER(1)--DMAKDYMER(4).-', '-.AQILAQKELPIDEDEEMK(7)--KIR(1).-', '-.KTAER(1)--PVFQLLEKQILSR(8).-', '-.KI…
24	95	-1290.78	S_02788	-.HKILFDR(2)--VVAAEEKNGVVFIR(7).-', '-.GEGVGAYNPQLNLKNVQR(14)--VVAAEEKNGVVFIR(7).-', '-.DMAKDYMER(4)--KTAER(1).-', '-.DWIKGWR(4)--WSKYK(3).-', '-.KTAER(1)--DYAAIVEQNLQHFKPVFQLLEK(14).-', '-.FSDKR(4)--KTAER(1).-', '-.HKILFDR(2)--GEGVGAYNPQLNLKNVQR(14).-', '-.KIR(1)--YKFVDAVPDIFAQIEVNEK(2).-', '-.KTAER(1)--DMAKDYMER(4).-', '-.AQILAQKELPIDEDEEMK(7)--KIR(1).-', '-.KTAER(1)--PVFQLLEKQILSR(8).-', '-.KI…
24	95	-1286.4	S_02492	-.HKILFDR(2)--VVAAEEKNGVVFIR(7).-', '-.GEGVGAYNPQLNLKNVQR(14)--VVAAEEKNGVVFIR(7).-', '-.DMAKDYMER(4)--KTAER(1).-', '-.DWIKGWR(4)--WSKYK(3).-', '-.KTAER(1)--DYAAIVEQNLQHFKPVFQLLEK(14).-', '-.FSDKR(4)--KTAER(1).-', '-.HKILFDR(2)--GEGVGAYNPQLNLKNVQR(14).-', '-.KIR(1)--YKFVDAVPDIFAQIEVNEK(2).-', '-.KTAER(1)--DMAKDYMER(4).-', '-.AQILAQKELPIDEDEEMK(7)--KIR(1).-', '-.KTAER(1)--PVFQLLEKQILSR(8).-', '-.KI…
24	95	-1279.8	S_00472	-.HKILFDR(2)--VVAAEEKNGVVFIR(7).-', '-.GEGVGAYNPQLNLKNVQR(14)--VVAAEEKNGVVFIR(7).-', '-.DMAKDYMER(4)--KTAER(1).-', '-.DWIKGWR(4)--WSKYK(3).-', '-.KTAER(1)--DYAAIVEQNLQHFKPVFQLLEK(14).-', '-.FSDKR(4)--KTAER(1).-', '-.HKILFDR(2)--GEGVGAYNPQLNLKNVQR(14).-', '-.KIR(1)--YKFVDAVPDIFAQIEVNEK(2).-', '-.KTAER(1)--DMAKDYMER(4).-', '-.AQILAQKELPIDEDEEMK(7)--KIR(1).-', '-.KTAER(1)--PVFQLLEKQILSR(8).-', '-.KI…
24	95	-1274.05	S_02530	-.HKILFDR(2)--VVAAEEKNGVVFIR(7).-', '-.GEGVGAYNPQLNLKNVQR(14)--VVAAEEKNGVVFIR(7).-', '-.DMAKDYMER(4)--KTAER(1).-', '-.DWIKGWR(4)--WSKYK(3).-', '-.KTAER(1)--DYAAIVEQNLQHFKPVFQLLEK(14).-', '-.FSDKR(4)--KTAER(1).-', '-.HKILFDR(2)--GEGVGAYNPQLNLKNVQR(14).-', '-.KIR(1)--YKFVDAVPDIFAQIEVNEK(2).-', '-.KTAER(1)--DMAKDYMER(4).-', '-.AQILAQKELPIDEDEEMK(7)--KIR(1).-', '-.KTAER(1)--PVFQLLEKQILSR(8).-', '-.KI…
24	95	-1273.07	S_00555	-.HKILFDR(2)--VVAAEEKNGVVFIR(7).-', '-.GEGVGAYNPQLNLKNVQR(14)--VVAAEEKNGVVFIR(7).-', '-.DMAKDYMER(4)--KTAER(1).-', '-.DWIKGWR(4)--WSKYK(3).-', '-.KTAER(1)--DYAAIVEQNLQHFKPVFQLLEK(14).-', '-.FSDKR(4)--KTAER(1).-', '-.HKILFDR(2)--GEGVGAYNPQLNLKNVQR(14).-', '-.KIR(1)--YKFVDAVPDIFAQIEVNEK(2).-', '-.KTAER(1)--DMAKDYMER(4).-', '-.AQILAQKELPIDEDEEMK(7)--KIR(1).-', '-.KTAER(1)--PVFQLLEKQILSR(8).-', '-.KI…
24	95	-1244.01	S_02308	-.HKILFDR(2)--VVAAEEKNGVVFIR(7).-', '-.GEGVGAYNPQLNLKNVQR(14)--VVAAEEKNGVVFIR(7).-', '-.DMAKDYMER(4)--KTAER(1).-', '-.DWIKGWR(4)--WSKYK(3).-', '-.KTAER(1)--DYAAIVEQNLQHFKPVFQLLEK(14).-', '-.FSDKR(4)--KTAER(1).-', '-.HKILFDR(2)--GEGVGAYNPQLNLKNVQR(14).-', '-.KIR(1)--YKFVDAVPDIFAQIEVNEK(2).-', '-.KTAER(1)--DMAKDYMER(4).-', '-.AQILAQKELPIDEDEEMK(7)--KIR(1).-', '-.KTAER(1)--PVFQLLEKQILSR(8).-', '-.KI…
24	95	-1152.97	S_00843	-.HKILFDR(2)--VVAAEEKNGVVFIR(7).-', '-.GEGVGAYNPQLNLKNVQR(14)--VVAAEEKNGVVFIR(7).-', '-.DMAKDYMER(4)--KTAER(1).-', '-.DWIKGWR(4)--WSKYK(3).-', '-.KTAER(1)--DYAAIVEQNLQHFKPVFQLLEK(14).-', '-.FSDKR(4)--KTAER(1).-', '-.HKILFDR(2)--GEGVGAYNPQLNLKNVQR(14).-', '-.KIR(1)--YKFVDAVPDIFAQIEVNEK(2).-', '-.KTAER(1)--DMAKDYMER(4).-', '-.AQILAQKELPIDEDEEMK(7)--KIR(1).-', '-.KTAER(1)--PVFQLLEKQILSR(8).-', '-.KI…
24	94	-1283.43	S_02245	-.HKILFDR(2)--VVAAEEKNGVVFIR(7).-', '-.GEGVGAYNPQLNLKNVQR(14)--VVAAEEKNGVVFIR(7).-', '-.DMAKDYMER(4)--KTAER(1).-', '-.DWIKGWR(4)--WSKYK(3).-', '-.KTAER(1)--DYAAIVEQNLQHFKPVFQLLEK(14).-', '-.FSDKR(4)--KTAER(1).-', '-.HKILFDR(2)--GEGVGAYNPQLNLKNVQR(14).-', '-.KIR(1)--YKFVDAVPDIFAQIEVNEK(2).-', '-.KTAER(1)--DMAKDYMER(4).-', '-.AQILAQKELPIDEDEEMK(7)--KIR(1).-', '-.KTAER(1)--PVFQLLEKQILSR(8).-', '-.KI…
24	94	-1262.01	S_00154	-.HKILFDR(2)--VVAAEEKNGVVFIR(7).-', '-.GEGVGAYNPQLNLKNVQR(14)--VVAAEEKNGVVFIR(7).-', '-.DMAKDYMER(4)--KTAER(1).-', '-.DWIKGWR(4)--WSKYK(3).-', '-.KTAER(1)--DYAAIVEQNLQHFKPVFQLLEK(14).-', '-.FSDKR(4)--KTAER(1).-', '-.HKILFDR(2)--GEGVGAYNPQLNLKNVQR(14).-', '-.KIR(1)--YKFVDAVPDIFAQIEVNEK(2).-', '-.KTAER(1)--DMAKDYMER(4).-', '-.AQILAQKELPIDEDEEMK(7)--KIR(1).-', '-.KTAER(1)--PVFQLLEKQILSR(8).-', '-.KI…
24	94	-1256.04	S_00727	-.HKILFDR(2)--VVAAEEKNGVVFIR(7).-', '-.GEGVGAYNPQLNLKNVQR(14)--VVAAEEKNGVVFIR(7).-', '-.DMAKDYMER(4)--KTAER(1).-', '-.DWIKGWR(4)--WSKYK(3).-', '-.KTAER(1)--DYAAIVEQNLQHFKPVFQLLEK(14).-', '-.FSDKR(4)--KTAER(1).-', '-.HKILFDR(2)--GEGVGAYNPQLNLKNVQR(14).-', '-.KIR(1)--YKFVDAVPDIFAQIEVNEK(2).-', '-.KTAER(1)--DMAKDYMER(4).-', '-.AQILAQKELPIDEDEEMK(7)--KIR(1).-', '-.KTAER(1)--PVFQLLEKQILSR(8).-', '-.KI…
24	94	-1238.09	S_00001	-.HKILFDR(2)--VVAAEEKNGVVFIR(7).-', '-.GEGVGAYNPQLNLKNVQR(14)--VVAAEEKNGVVFIR(7).-', '-.DMAKDYMER(4)--KTAER(1).-', '-.DWIKGWR(4)--WSKYK(3).-', '-.KTAER(1)--DYAAIVEQNLQHFKPVFQLLEK(14).-', '-.FSDKR(4)--KTAER(1).-', '-.HKILFDR(2)--GEGVGAYNPQLNLKNVQR(14).-', '-.KIR(1)--YKFVDAVPDIFAQIEVNEK(2).-', '-.KTAER(1)--DMAKDYMER(4).-', '-.AQILAQKELPIDEDEEMK(7)--KIR(1).-', '-.KTAER(1)--PVFQLLEKQILSR(8).-', '-.KI…
24	94	-1215.42	S_00671	-.HKILFDR(2)--VVAAEEKNGVVFIR(7).-', '-.GEGVGAYNPQLNLKNVQR(14)--VVAAEEKNGVVFIR(7).-', '-.DMAKDYMER(4)--KTAER(1).-', '-.DWIKGWR(4)--WSKYK(3).-', '-.KTAER(1)--DYAAIVEQNLQHFKPVFQLLEK(14).-', '-.FSDKR(4)--KTAER(1).-', '-.HKILFDR(2)--GEGVGAYNPQLNLKNVQR(14).-', '-.KIR(1)--YKFVDAVPDIFAQIEVNEK(2).-', '-.KTAER(1)--DMAKDYMER(4).-', '-.AQILAQKELPIDEDEEMK(7)--KIR(1).-', '-.KTAER(1)--PVFQLLEKQILSR(8).-', '-.KI…
24	94	-1188.38	S_00794	-.HKILFDR(2)--VVAAEEKNGVVFIR(7).-', '-.GEGVGAYNPQLNLKNVQR(14)--VVAAEEKNGVVFIR(7).-', '-.DMAKDYMER(4)--KTAER(1).-', '-.DWIKGWR(4)--WSKYK(3).-', '-.KTAER(1)--DYAAIVEQNLQHFKPVFQLLEK(14).-', '-.FSDKR(4)--KTAER(1).-', '-.HKILFDR(2)--GEGVGAYNPQLNLKNVQR(14).-', '-.KIR(1)--YKFVDAVPDIFAQIEVNEK(2).-', '-.KTAER(1)--DMAKDYMER(4).-', '-.AQILAQKELPIDEDEEMK(7)--KIR(1).-', '-.KTAER(1)--PVFQLLEKQILSR(8).-', '-.KI…
24	93	-1311.1	S_02822	-.HKILFDR(2)--VVAAEEKNGVVFIR(7).-', '-.GEGVGAYNPQLNLKNVQR(14)--VVAAEEKNGVVFIR(7).-', '-.DMAKDYMER(4)--KTAER(1).-', '-.DWIKGWR(4)--WSKYK(3).-', '-.KTAER(1)--DYAAIVEQNLQHFKPVFQLLEK(14).-', '-.FSDKR(4)--KTAER(1).-', '-.HKILFDR(2)--GEGVGAYNPQLNLKNVQR(14).-', '-.KIR(1)--YKFVDAVPDIFAQIEVNEK(2).-', '-.KTAER(1)--DMAKDYMER(4).-', '-.AQILAQKELPIDEDEEMK(7)--KIR(1).-', '-.KTAER(1)--PVFQLLEKQILSR(8).-', '-.KI…
24	93	-1295.2	S_00111	-.HKILFDR(2)--VVAAEEKNGVVFIR(7).-', '-.GEGVGAYNPQLNLKNVQR(14)--VVAAEEKNGVVFIR(7).-', '-.DMAKDYMER(4)--KTAER(1).-', '-.DWIKGWR(4)--WSKYK(3).-', '-.KTAER(1)--DYAAIVEQNLQHFKPVFQLLEK(14).-', '-.FSDKR(4)--KTAER(1).-', '-.HKILFDR(2)--GEGVGAYNPQLNLKNVQR(14).-', '-.KIR(1)--YKFVDAVPDIFAQIEVNEK(2).-', '-.KTAER(1)--DMAKDYMER(4).-', '-.AQILAQKELPIDEDEEMK(7)--KIR(1).-', '-.KTAER(1)--PVFQLLEKQILSR(8).-', '-.KI…
24	93	-1273.32	S_00979	-.HKILFDR(2)--VVAAEEKNGVVFIR(7).-', '-.GEGVGAYNPQLNLKNVQR(14)--VVAAEEKNGVVFIR(7).-', '-.DMAKDYMER(4)--KTAER(1).-', '-.DWIKGWR(4)--WSKYK(3).-', '-.KTAER(1)--DYAAIVEQNLQHFKPVFQLLEK(14).-', '-.FSDKR(4)--KTAER(1).-', '-.HKILFDR(2)--GEGVGAYNPQLNLKNVQR(14).-', '-.KIR(1)--YKFVDAVPDIFAQIEVNEK(2).-', '-.KTAER(1)--DMAKDYMER(4).-', '-.AQILAQKELPIDEDEEMK(7)--KIR(1).-', '-.KTAER(1)--PVFQLLEKQILSR(8).-', '-.KI…
24	93	-1267.04	S_00231	-.HKILFDR(2)--VVAAEEKNGVVFIR(7).-', '-.GEGVGAYNPQLNLKNVQR(14)--VVAAEEKNGVVFIR(7).-', '-.DMAKDYMER(4)--KTAER(1).-', '-.DWIKGWR(4)--WSKYK(3).-', '-.KTAER(1)--DYAAIVEQNLQHFKPVFQLLEK(14).-', '-.FSDKR(4)--KTAER(1).-', '-.HKILFDR(2)--GEGVGAYNPQLNLKNVQR(14).-', '-.KIR(1)--YKFVDAVPDIFAQIEVNEK(2).-', '-.KTAER(1)--DMAKDYMER(4).-', '-.AQILAQKELPIDEDEEMK(7)--KIR(1).-', '-.KTAER(1)--PVFQLLEKQILSR(8).-', '-.KI…
24	93	-1254	S_01527	-.HKILFDR(2)--VVAAEEKNGVVFIR(7).-', '-.GEGVGAYNPQLNLKNVQR(14)--VVAAEEKNGVVFIR(7).-', '-.DMAKDYMER(4)--KTAER(1).-', '-.DWIKGWR(4)--WSKYK(3).-', '-.KTAER(1)--DYAAIVEQNLQHFKPVFQLLEK(14).-', '-.FSDKR(4)--KTAER(1).-', '-.HKILFDR(2)--GEGVGAYNPQLNLKNVQR(14).-', '-.KIR(1)--YKFVDAVPDIFAQIEVNEK(2).-', '-.KTAER(1)--DMAKDYMER(4).-', '-.AQILAQKELPIDEDEEMK(7)--KIR(1).-', '-.KTAER(1)--PVFQLLEKQILSR(8).-', '-.KI…
24	93	-1245.68	S_02997	-.HKILFDR(2)--VVAAEEKNGVVFIR(7).-', '-.GEGVGAYNPQLNLKNVQR(14)--VVAAEEKNGVVFIR(7).-', '-.DMAKDYMER(4)--KTAER(1).-', '-.DWIKGWR(4)--WSKYK(3).-', '-.KTAER(1)--DYAAIVEQNLQHFKPVFQLLEK(14).-', '-.FSDKR(4)--KTAER(1).-', '-.HKILFDR(2)--GEGVGAYNPQLNLKNVQR(14).-', '-.KIR(1)--YKFVDAVPDIFAQIEVNEK(2).-', '-.KTAER(1)--DMAKDYMER(4).-', '-.AQILAQKELPIDEDEEMK(7)--KIR(1).-', '-.KTAER(1)--PVFQLLEKQILSR(8).-', '-.KI…
24	93	-1245.62	S_01439	-.HKILFDR(2)--VVAAEEKNGVVFIR(7).-', '-.GEGVGAYNPQLNLKNVQR(14)--VVAAEEKNGVVFIR(7).-', '-.DMAKDYMER(4)--KTAER(1).-', '-.DWIKGWR(4)--WSKYK(3).-', '-.KTAER(1)--DYAAIVEQNLQHFKPVFQLLEK(14).-', '-.FSDKR(4)--KTAER(1).-', '-.HKILFDR(2)--GEGVGAYNPQLNLKNVQR(14).-', '-.KIR(1)--YKFVDAVPDIFAQIEVNEK(2).-', '-.KTAER(1)--DMAKDYMER(4).-', '-.AQILAQKELPIDEDEEMK(7)--KIR(1).-', '-.KTAER(1)--PVFQLLEKQILSR(8).-', '-.KI…
24	93	-1233.39	S_01727	-.HKILFDR(2)--VVAAEEKNGVVFIR(7).-', '-.GEGVGAYNPQLNLKNVQR(14)--VVAAEEKNGVVFIR(7).-', '-.DMAKDYMER(4)--KTAER(1).-', '-.DWIKGWR(4)--WSKYK(3).-', '-.KTAER(1)--DYAAIVEQNLQHFKPVFQLLEK(14).-', '-.FSDKR(4)--KTAER(1).-', '-.HKILFDR(2)--GEGVGAYNPQLNLKNVQR(14).-', '-.KIR(1)--YKFVDAVPDIFAQIEVNEK(2).-', '-.KTAER(1)--DMAKDYMER(4).-', '-.AQILAQKELPIDEDEEMK(7)--KIR(1).-', '-.KTAER(1)--PVFQLLEKQILSR(8).-', '-.KI…
24	93	-1232.56	S_01483	-.HKILFDR(2)--VVAAEEKNGVVFIR(7).-', '-.GEGVGAYNPQLNLKNVQR(14)--VVAAEEKNGVVFIR(7).-', '-.DMAKDYMER(4)--KTAER(1).-', '-.DWIKGWR(4)--WSKYK(3).-', '-.KTAER(1)--DYAAIVEQNLQHFKPVFQLLEK(14).-', '-.FSDKR(4)--KTAER(1).-', '-.HKILFDR(2)--GEGVGAYNPQLNLKNVQR(14).-', '-.KIR(1)--YKFVDAVPDIFAQIEVNEK(2).-', '-.KTAER(1)--DMAKDYMER(4).-', '-.AQILAQKELPIDEDEEMK(7)--KIR(1).-', '-.KTAER(1)--PVFQLLEKQILSR(8).-', '-.KI…
24	93	-1215.71	S_00318	-.HKILFDR(2)--VVAAEEKNGVVFIR(7).-', '-.GEGVGAYNPQLNLKNVQR(14)--VVAAEEKNGVVFIR(7).-', '-.DMAKDYMER(4)--KTAER(1).-', '-.DWIKGWR(4)--WSKYK(3).-', '-.KTAER(1)--DYAAIVEQNLQHFKPVFQLLEK(14).-', '-.FSDKR(4)--KTAER(1).-', '-.HKILFDR(2)--GEGVGAYNPQLNLKNVQR(14).-', '-.KIR(1)--YKFVDAVPDIFAQIEVNEK(2).-', '-.KTAER(1)--DMAKDYMER(4).-', '-.AQILAQKELPIDEDEEMK(7)--KIR(1).-', '-.KTAER(1)--PVFQLLEKQILSR(8).-', '-.KI…
24	92	-1253.27	S_01412	-.HKILFDR(2)--VVAAEEKNGVVFIR(7).-', '-.GEGVGAYNPQLNLKNVQR(14)--VVAAEEKNGVVFIR(7).-', '-.DMAKDYMER(4)--KTAER(1).-', '-.DWIKGWR(4)--WSKYK(3).-', '-.KTAER(1)--DYAAIVEQNLQHFKPVFQLLEK(14).-', '-.FSDKR(4)--KTAER(1).-', '-.HKILFDR(2)--GEGVGAYNPQLNLKNVQR(14).-', '-.KIR(1)--YKFVDAVPDIFAQIEVNEK(2).-', '-.KTAER(1)--DMAKDYMER(4).-', '-.AQILAQKELPIDEDEEMK(7)--KIR(1).-', '-.KTAER(1)--PVFQLLEKQILSR(8).-', '-.KI…
24	92	-1238.01	S_00403	-.HKILFDR(2)--VVAAEEKNGVVFIR(7).-', '-.GEGVGAYNPQLNLKNVQR(14)--VVAAEEKNGVVFIR(7).-', '-.DMAKDYMER(4)--KTAER(1).-', '-.DWIKGWR(4)--WSKYK(3).-', '-.KTAER(1)--DYAAIVEQNLQHFKPVFQLLEK(14).-', '-.FSDKR(4)--KTAER(1).-', '-.HKILFDR(2)--GEGVGAYNPQLNLKNVQR(14).-', '-.KIR(1)--YKFVDAVPDIFAQIEVNEK(2).-', '-.KTAER(1)--DMAKDYMER(4).-', '-.AQILAQKELPIDEDEEMK(7)--KIR(1).-', '-.KTAER(1)--PVFQLLEKQILSR(8).-', '-.KI…
24	92	-1229	S_00079	-.HKILFDR(2)--VVAAEEKNGVVFIR(7).-', '-.GEGVGAYNPQLNLKNVQR(14)--VVAAEEKNGVVFIR(7).-', '-.DMAKDYMER(4)--KTAER(1).-', '-.DWIKGWR(4)--WSKYK(3).-', '-.KTAER(1)--DYAAIVEQNLQHFKPVFQLLEK(14).-', '-.FSDKR(4)--KTAER(1).-', '-.HKILFDR(2)--GEGVGAYNPQLNLKNVQR(14).-', '-.KIR(1)--YKFVDAVPDIFAQIEVNEK(2).-', '-.KTAER(1)--DMAKDYMER(4).-', '-.AQILAQKELPIDEDEEMK(7)--KIR(1).-', '-.KTAER(1)--PVFQLLEKQILSR(8).-', '-.KI…
24	92	-1226.59	S_01030	-.HKILFDR(2)--VVAAEEKNGVVFIR(7).-', '-.GEGVGAYNPQLNLKNVQR(14)--VVAAEEKNGVVFIR(7).-', '-.DMAKDYMER(4)--KTAER(1).-', '-.DWIKGWR(4)--WSKYK(3).-', '-.KTAER(1)--DYAAIVEQNLQHFKPVFQLLEK(14).-', '-.FSDKR(4)--KTAER(1).-', '-.HKILFDR(2)--GEGVGAYNPQLNLKNVQR(14).-', '-.KIR(1)--YKFVDAVPDIFAQIEVNEK(2).-', '-.KTAER(1)--DMAKDYMER(4).-', '-.AQILAQKELPIDEDEEMK(7)--KIR(1).-', '-.KTAER(1)--PVFQLLEKQILSR(8).-', '-.KI…
24	92	-1219.6	S_01090	-.HKILFDR(2)--VVAAEEKNGVVFIR(7).-', '-.GEGVGAYNPQLNLKNVQR(14)--VVAAEEKNGVVFIR(7).-', '-.DMAKDYMER(4)--KTAER(1).-', '-.DWIKGWR(4)--WSKYK(3).-', '-.KTAER(1)--DYAAIVEQNLQHFKPVFQLLEK(14).-', '-.FSDKR(4)--KTAER(1).-', '-.HKILFDR(2)--GEGVGAYNPQLNLKNVQR(14).-', '-.KIR(1)--YKFVDAVPDIFAQIEVNEK(2).-', '-.KTAER(1)--DMAKDYMER(4).-', '-.AQILAQKELPIDEDEEMK(7)--KIR(1).-', '-.KTAER(1)--PVFQLLEKQILSR(8).-', '-.KI…
24	91	-1274.29	S_02306	-.HKILFDR(2)--VVAAEEKNGVVFIR(7).-', '-.GEGVGAYNPQLNLKNVQR(14)--VVAAEEKNGVVFIR(7).-', '-.DMAKDYMER(4)--KTAER(1).-', '-.DWIKGWR(4)--WSKYK(3).-', '-.KTAER(1)--DYAAIVEQNLQHFKPVFQLLEK(14).-', '-.FSDKR(4)--KTAER(1).-', '-.HKILFDR(2)--GEGVGAYNPQLNLKNVQR(14).-', '-.KIR(1)--YKFVDAVPDIFAQIEVNEK(2).-', '-.KTAER(1)--DMAKDYMER(4).-', '-.AQILAQKELPIDEDEEMK(7)--KIR(1).-', '-.KTAER(1)--PVFQLLEKQILSR(8).-', '-.KI…
24	91	-1269.09	S_02302	-.HKILFDR(2)--VVAAEEKNGVVFIR(7).-', '-.GEGVGAYNPQLNLKNVQR(14)--VVAAEEKNGVVFIR(7).-', '-.DMAKDYMER(4)--KTAER(1).-', '-.DWIKGWR(4)--WSKYK(3).-', '-.KTAER(1)--DYAAIVEQNLQHFKPVFQLLEK(14).-', '-.FSDKR(4)--KTAER(1).-', '-.HKILFDR(2)--GEGVGAYNPQLNLKNVQR(14).-', '-.KIR(1)--YKFVDAVPDIFAQIEVNEK(2).-', '-.KTAER(1)--DMAKDYMER(4).-', '-.AQILAQKELPIDEDEEMK(7)--KIR(1).-', '-.KTAER(1)--PVFQLLEKQILSR(8).-', '-.KI…
24	91	-1239.29	S_02055	-.HKILFDR(2)--VVAAEEKNGVVFIR(7).-', '-.GEGVGAYNPQLNLKNVQR(14)--VVAAEEKNGVVFIR(7).-', '-.DMAKDYMER(4)--KTAER(1).-', '-.DWIKGWR(4)--WSKYK(3).-', '-.KTAER(1)--DYAAIVEQNLQHFKPVFQLLEK(14).-', '-.FSDKR(4)--KTAER(1).-', '-.HKILFDR(2)--GEGVGAYNPQLNLKNVQR(14).-', '-.KIR(1)--YKFVDAVPDIFAQIEVNEK(2).-', '-.KTAER(1)--DMAKDYMER(4).-', '-.AQILAQKELPIDEDEEMK(7)--KIR(1).-', '-.KTAER(1)--PVFQLLEKQILSR(8).-', '-.KI…
24	91	-1239	S_02686	-.HKILFDR(2)--VVAAEEKNGVVFIR(7).-', '-.GEGVGAYNPQLNLKNVQR(14)--VVAAEEKNGVVFIR(7).-', '-.DMAKDYMER(4)--KTAER(1).-', '-.DWIKGWR(4)--WSKYK(3).-', '-.KTAER(1)--DYAAIVEQNLQHFKPVFQLLEK(14).-', '-.FSDKR(4)--KTAER(1).-', '-.HKILFDR(2)--GEGVGAYNPQLNLKNVQR(14).-', '-.KIR(1)--YKFVDAVPDIFAQIEVNEK(2).-', '-.KTAER(1)--DMAKDYMER(4).-', '-.AQILAQKELPIDEDEEMK(7)--KIR(1).-', '-.KTAER(1)--PVFQLLEKQILSR(8).-', '-.KI…
24	91	-1230.2	S_01662	-.HKILFDR(2)--VVAAEEKNGVVFIR(7).-', '-.GEGVGAYNPQLNLKNVQR(14)--VVAAEEKNGVVFIR(7).-', '-.DMAKDYMER(4)--KTAER(1).-', '-.DWIKGWR(4)--WSKYK(3).-', '-.KTAER(1)--DYAAIVEQNLQHFKPVFQLLEK(14).-', '-.FSDKR(4)--KTAER(1).-', '-.HKILFDR(2)--GEGVGAYNPQLNLKNVQR(14).-', '-.KIR(1)--YKFVDAVPDIFAQIEVNEK(2).-', '-.KTAER(1)--DMAKDYMER(4).-', '-.AQILAQKELPIDEDEEMK(7)--KIR(1).-', '-.KTAER(1)--PVFQLLEKQILSR(8).-', '-.KI…
24	91	-1224.01	S_00241	-.HKILFDR(2)--VVAAEEKNGVVFIR(7).-', '-.GEGVGAYNPQLNLKNVQR(14)--VVAAEEKNGVVFIR(7).-', '-.DMAKDYMER(4)--KTAER(1).-', '-.DWIKGWR(4)--WSKYK(3).-', '-.KTAER(1)--DYAAIVEQNLQHFKPVFQLLEK(14).-', '-.FSDKR(4)--KTAER(1).-', '-.HKILFDR(2)--GEGVGAYNPQLNLKNVQR(14).-', '-.KIR(1)--YKFVDAVPDIFAQIEVNEK(2).-', '-.KTAER(1)--DMAKDYMER(4).-', '-.AQILAQKELPIDEDEEMK(7)--KIR(1).-', '-.KTAER(1)--PVFQLLEKQILSR(8).-', '-.KI…
24	91	-1202.11	S_01392	-.HKILFDR(2)--VVAAEEKNGVVFIR(7).-', '-.GEGVGAYNPQLNLKNVQR(14)--VVAAEEKNGVVFIR(7).-', '-.DMAKDYMER(4)--KTAER(1).-', '-.DWIKGWR(4)--WSKYK(3).-', '-.KTAER(1)--DYAAIVEQNLQHFKPVFQLLEK(14).-', '-.FSDKR(4)--KTAER(1).-', '-.HKILFDR(2)--GEGVGAYNPQLNLKNVQR(14).-', '-.KIR(1)--YKFVDAVPDIFAQIEVNEK(2).-', '-.KTAER(1)--DMAKDYMER(4).-', '-.AQILAQKELPIDEDEEMK(7)--KIR(1).-', '-.KTAER(1)--PVFQLLEKQILSR(8).-', '-.KI…
24	90	-1280.31	S_01411	-.HKILFDR(2)--VVAAEEKNGVVFIR(7).-', '-.GEGVGAYNPQLNLKNVQR(14)--VVAAEEKNGVVFIR(7).-', '-.DMAKDYMER(4)--KTAER(1).-', '-.DWIKGWR(4)--WSKYK(3).-', '-.KTAER(1)--DYAAIVEQNLQHFKPVFQLLEK(14).-', '-.FSDKR(4)--KTAER(1).-', '-.HKILFDR(2)--GEGVGAYNPQLNLKNVQR(14).-', '-.KIR(1)--YKFVDAVPDIFAQIEVNEK(2).-', '-.KTAER(1)--DMAKDYMER(4).-', '-.AQILAQKELPIDEDEEMK(7)--KIR(1).-', '-.KTAER(1)--PVFQLLEKQILSR(8).-', '-.KI…
24	90	-1272.16	S_00119	-.HKILFDR(2)--VVAAEEKNGVVFIR(7).-', '-.GEGVGAYNPQLNLKNVQR(14)--VVAAEEKNGVVFIR(7).-', '-.DMAKDYMER(4)--KTAER(1).-', '-.DWIKGWR(4)--WSKYK(3).-', '-.KTAER(1)--DYAAIVEQNLQHFKPVFQLLEK(14).-', '-.FSDKR(4)--KTAER(1).-', '-.HKILFDR(2)--GEGVGAYNPQLNLKNVQR(14).-', '-.KIR(1)--YKFVDAVPDIFAQIEVNEK(2).-', '-.KTAER(1)--DMAKDYMER(4).-', '-.AQILAQKELPIDEDEEMK(7)--KIR(1).-', '-.KTAER(1)--PVFQLLEKQILSR(8).-', '-.KI…
24	90	-1252.64	S_01801	-.HKILFDR(2)--VVAAEEKNGVVFIR(7).-', '-.GEGVGAYNPQLNLKNVQR(14)--VVAAEEKNGVVFIR(7).-', '-.DMAKDYMER(4)--KTAER(1).-', '-.DWIKGWR(4)--WSKYK(3).-', '-.KTAER(1)--DYAAIVEQNLQHFKPVFQLLEK(14).-', '-.FSDKR(4)--KTAER(1).-', '-.HKILFDR(2)--GEGVGAYNPQLNLKNVQR(14).-', '-.KIR(1)--YKFVDAVPDIFAQIEVNEK(2).-', '-.KTAER(1)--DMAKDYMER(4).-', '-.AQILAQKELPIDEDEEMK(7)--KIR(1).-', '-.KTAER(1)--PVFQLLEKQILSR(8).-', '-.KI…
24	89	-1272.54	S_01155	-.HKILFDR(2)--VVAAEEKNGVVFIR(7).-', '-.GEGVGAYNPQLNLKNVQR(14)--VVAAEEKNGVVFIR(7).-', '-.DMAKDYMER(4)--KTAER(1).-', '-.DWIKGWR(4)--WSKYK(3).-', '-.KTAER(1)--DYAAIVEQNLQHFKPVFQLLEK(14).-', '-.FSDKR(4)--KTAER(1).-', '-.HKILFDR(2)--GEGVGAYNPQLNLKNVQR(14).-', '-.KIR(1)--YKFVDAVPDIFAQIEVNEK(2).-', '-.KTAER(1)--DMAKDYMER(4).-', '-.AQILAQKELPIDEDEEMK(7)--KIR(1).-', '-.KTAER(1)--PVFQLLEKQILSR(8).-', '-.KI…
24	89	-1257.58	S_00542	-.HKILFDR(2)--VVAAEEKNGVVFIR(7).-', '-.GEGVGAYNPQLNLKNVQR(14)--VVAAEEKNGVVFIR(7).-', '-.DMAKDYMER(4)--KTAER(1).-', '-.DWIKGWR(4)--WSKYK(3).-', '-.KTAER(1)--DYAAIVEQNLQHFKPVFQLLEK(14).-', '-.FSDKR(4)--KTAER(1).-', '-.HKILFDR(2)--GEGVGAYNPQLNLKNVQR(14).-', '-.KIR(1)--YKFVDAVPDIFAQIEVNEK(2).-', '-.KTAER(1)--DMAKDYMER(4).-', '-.AQILAQKELPIDEDEEMK(7)--KIR(1).-', '-.KTAER(1)--PVFQLLEKQILSR(8).-', '-.KI…
24	89	-1227.79	S_02948	-.HKILFDR(2)--VVAAEEKNGVVFIR(7).-', '-.GEGVGAYNPQLNLKNVQR(14)--VVAAEEKNGVVFIR(7).-', '-.DMAKDYMER(4)--KTAER(1).-', '-.DWIKGWR(4)--WSKYK(3).-', '-.KTAER(1)--DYAAIVEQNLQHFKPVFQLLEK(14).-', '-.FSDKR(4)--KTAER(1).-', '-.HKILFDR(2)--GEGVGAYNPQLNLKNVQR(14).-', '-.KIR(1)--YKFVDAVPDIFAQIEVNEK(2).-', '-.KTAER(1)--DMAKDYMER(4).-', '-.AQILAQKELPIDEDEEMK(7)--KIR(1).-', '-.KTAER(1)--PVFQLLEKQILSR(8).-', '-.KI…
24	89	-1211.88	S_02494	-.HKILFDR(2)--VVAAEEKNGVVFIR(7).-', '-.GEGVGAYNPQLNLKNVQR(14)--VVAAEEKNGVVFIR(7).-', '-.DMAKDYMER(4)--KTAER(1).-', '-.DWIKGWR(4)--WSKYK(3).-', '-.KTAER(1)--DYAAIVEQNLQHFKPVFQLLEK(14).-', '-.FSDKR(4)--KTAER(1).-', '-.HKILFDR(2)--GEGVGAYNPQLNLKNVQR(14).-', '-.KIR(1)--YKFVDAVPDIFAQIEVNEK(2).-', '-.KTAER(1)--DMAKDYMER(4).-', '-.AQILAQKELPIDEDEEMK(7)--KIR(1).-', '-.KTAER(1)--PVFQLLEKQILSR(8).-', '-.KI…
24	89	-1203.89	S_00428	-.HKILFDR(2)--VVAAEEKNGVVFIR(7).-', '-.GEGVGAYNPQLNLKNVQR(14)--VVAAEEKNGVVFIR(7).-', '-.DMAKDYMER(4)--KTAER(1).-', '-.DWIKGWR(4)--WSKYK(3).-', '-.KTAER(1)--DYAAIVEQNLQHFKPVFQLLEK(14).-', '-.FSDKR(4)--KTAER(1).-', '-.HKILFDR(2)--GEGVGAYNPQLNLKNVQR(14).-', '-.KIR(1)--YKFVDAVPDIFAQIEVNEK(2).-', '-.KTAER(1)--DMAKDYMER(4).-', '-.AQILAQKELPIDEDEEMK(7)--KIR(1).-', '-.KTAER(1)--PVFQLLEKQILSR(8).-', '-.KI…
24	88	-1301.03	S_00161	-.HKILFDR(2)--VVAAEEKNGVVFIR(7).-', '-.GEGVGAYNPQLNLKNVQR(14)--VVAAEEKNGVVFIR(7).-', '-.DMAKDYMER(4)--KTAER(1).-', '-.DWIKGWR(4)--WSKYK(3).-', '-.KTAER(1)--DYAAIVEQNLQHFKPVFQLLEK(14).-', '-.FSDKR(4)--KTAER(1).-', '-.HKILFDR(2)--GEGVGAYNPQLNLKNVQR(14).-', '-.KIR(1)--YKFVDAVPDIFAQIEVNEK(2).-', '-.KTAER(1)--DMAKDYMER(4).-', '-.AQILAQKELPIDEDEEMK(7)--KIR(1).-', '-.KTAER(1)--PVFQLLEKQILSR(8).-', '-.KI…
24	88	-1283.57	S_00331	-.HKILFDR(2)--VVAAEEKNGVVFIR(7).-', '-.GEGVGAYNPQLNLKNVQR(14)--VVAAEEKNGVVFIR(7).-', '-.DMAKDYMER(4)--KTAER(1).-', '-.DWIKGWR(4)--WSKYK(3).-', '-.KTAER(1)--DYAAIVEQNLQHFKPVFQLLEK(14).-', '-.FSDKR(4)--KTAER(1).-', '-.HKILFDR(2)--GEGVGAYNPQLNLKNVQR(14).-', '-.KIR(1)--YKFVDAVPDIFAQIEVNEK(2).-', '-.KTAER(1)--DMAKDYMER(4).-', '-.AQILAQKELPIDEDEEMK(7)--KIR(1).-', '-.KTAER(1)--PVFQLLEKQILSR(8).-', '-.KI…
24	88	-1273.07	S_00286	-.HKILFDR(2)--VVAAEEKNGVVFIR(7).-', '-.GEGVGAYNPQLNLKNVQR(14)--VVAAEEKNGVVFIR(7).-', '-.DMAKDYMER(4)--KTAER(1).-', '-.DWIKGWR(4)--WSKYK(3).-', '-.KTAER(1)--DYAAIVEQNLQHFKPVFQLLEK(14).-', '-.FSDKR(4)--KTAER(1).-', '-.HKILFDR(2)--GEGVGAYNPQLNLKNVQR(14).-', '-.KIR(1)--YKFVDAVPDIFAQIEVNEK(2).-', '-.KTAER(1)--DMAKDYMER(4).-', '-.AQILAQKELPIDEDEEMK(7)--KIR(1).-', '-.KTAER(1)--PVFQLLEKQILSR(8).-', '-.KI…
24	88	-1262.32	S_01994	-.HKILFDR(2)--VVAAEEKNGVVFIR(7).-', '-.GEGVGAYNPQLNLKNVQR(14)--VVAAEEKNGVVFIR(7).-', '-.DMAKDYMER(4)--KTAER(1).-', '-.DWIKGWR(4)--WSKYK(3).-', '-.KTAER(1)--DYAAIVEQNLQHFKPVFQLLEK(14).-', '-.FSDKR(4)--KTAER(1).-', '-.HKILFDR(2)--GEGVGAYNPQLNLKNVQR(14).-', '-.KIR(1)--YKFVDAVPDIFAQIEVNEK(2).-', '-.KTAER(1)--DMAKDYMER(4).-', '-.AQILAQKELPIDEDEEMK(7)--KIR(1).-', '-.KTAER(1)--PVFQLLEKQILSR(8).-', '-.KI…
24	88	-1247.36	S_02078	-.HKILFDR(2)--VVAAEEKNGVVFIR(7).-', '-.GEGVGAYNPQLNLKNVQR(14)--VVAAEEKNGVVFIR(7).-', '-.DMAKDYMER(4)--KTAER(1).-', '-.DWIKGWR(4)--WSKYK(3).-', '-.KTAER(1)--DYAAIVEQNLQHFKPVFQLLEK(14).-', '-.FSDKR(4)--KTAER(1).-', '-.HKILFDR(2)--GEGVGAYNPQLNLKNVQR(14).-', '-.KIR(1)--YKFVDAVPDIFAQIEVNEK(2).-', '-.KTAER(1)--DMAKDYMER(4).-', '-.AQILAQKELPIDEDEEMK(7)--KIR(1).-', '-.KTAER(1)--PVFQLLEKQILSR(8).-', '-.KI…
24	88	-1239.19	S_01567	-.HKILFDR(2)--VVAAEEKNGVVFIR(7).-', '-.GEGVGAYNPQLNLKNVQR(14)--VVAAEEKNGVVFIR(7).-', '-.DMAKDYMER(4)--KTAER(1).-', '-.DWIKGWR(4)--WSKYK(3).-', '-.KTAER(1)--DYAAIVEQNLQHFKPVFQLLEK(14).-', '-.FSDKR(4)--KTAER(1).-', '-.HKILFDR(2)--GEGVGAYNPQLNLKNVQR(14).-', '-.KIR(1)--YKFVDAVPDIFAQIEVNEK(2).-', '-.KTAER(1)--DMAKDYMER(4).-', '-.AQILAQKELPIDEDEEMK(7)--KIR(1).-', '-.KTAER(1)--PVFQLLEKQILSR(8).-', '-.KI…
24	87	-1293.48	S_01778	-.HKILFDR(2)--VVAAEEKNGVVFIR(7).-', '-.GEGVGAYNPQLNLKNVQR(14)--VVAAEEKNGVVFIR(7).-', '-.DMAKDYMER(4)--KTAER(1).-', '-.DWIKGWR(4)--WSKYK(3).-', '-.KTAER(1)--DYAAIVEQNLQHFKPVFQLLEK(14).-', '-.FSDKR(4)--KTAER(1).-', '-.HKILFDR(2)--GEGVGAYNPQLNLKNVQR(14).-', '-.KIR(1)--YKFVDAVPDIFAQIEVNEK(2).-', '-.KTAER(1)--DMAKDYMER(4).-', '-.AQILAQKELPIDEDEEMK(7)--KIR(1).-', '-.KTAER(1)--PVFQLLEKQILSR(8).-', '-.KI…
24	87	-1275.73	S_01553	-.HKILFDR(2)--VVAAEEKNGVVFIR(7).-', '-.GEGVGAYNPQLNLKNVQR(14)--VVAAEEKNGVVFIR(7).-', '-.DMAKDYMER(4)--KTAER(1).-', '-.DWIKGWR(4)--WSKYK(3).-', '-.KTAER(1)--DYAAIVEQNLQHFKPVFQLLEK(14).-', '-.FSDKR(4)--KTAER(1).-', '-.HKILFDR(2)--GEGVGAYNPQLNLKNVQR(14).-', '-.KIR(1)--YKFVDAVPDIFAQIEVNEK(2).-', '-.KTAER(1)--DMAKDYMER(4).-', '-.AQILAQKELPIDEDEEMK(7)--KIR(1).-', '-.KTAER(1)--PVFQLLEKQILSR(8).-', '-.KI…
24	87	-1232.29	S_01707	-.HKILFDR(2)--VVAAEEKNGVVFIR(7).-', '-.GEGVGAYNPQLNLKNVQR(14)--VVAAEEKNGVVFIR(7).-', '-.DMAKDYMER(4)--KTAER(1).-', '-.DWIKGWR(4)--WSKYK(3).-', '-.KTAER(1)--DYAAIVEQNLQHFKPVFQLLEK(14).-', '-.FSDKR(4)--KTAER(1).-', '-.HKILFDR(2)--GEGVGAYNPQLNLKNVQR(14).-', '-.KIR(1)--YKFVDAVPDIFAQIEVNEK(2).-', '-.KTAER(1)--DMAKDYMER(4).-', '-.AQILAQKELPIDEDEEMK(7)--KIR(1).-', '-.KTAER(1)--PVFQLLEKQILSR(8).-', '-.KI…
24	87	-1198.5	S_01730	-.HKILFDR(2)--VVAAEEKNGVVFIR(7).-', '-.GEGVGAYNPQLNLKNVQR(14)--VVAAEEKNGVVFIR(7).-', '-.DMAKDYMER(4)--KTAER(1).-', '-.DWIKGWR(4)--WSKYK(3).-', '-.KTAER(1)--DYAAIVEQNLQHFKPVFQLLEK(14).-', '-.FSDKR(4)--KTAER(1).-', '-.HKILFDR(2)--GEGVGAYNPQLNLKNVQR(14).-', '-.KIR(1)--YKFVDAVPDIFAQIEVNEK(2).-', '-.KTAER(1)--DMAKDYMER(4).-', '-.AQILAQKELPIDEDEEMK(7)--KIR(1).-', '-.KTAER(1)--PVFQLLEKQILSR(8).-', '-.KI…
24	86	-1265.83	S_01399	-.HKILFDR(2)--VVAAEEKNGVVFIR(7).-', '-.GEGVGAYNPQLNLKNVQR(14)--VVAAEEKNGVVFIR(7).-', '-.DMAKDYMER(4)--KTAER(1).-', '-.DWIKGWR(4)--WSKYK(3).-', '-.KTAER(1)--DYAAIVEQNLQHFKPVFQLLEK(14).-', '-.FSDKR(4)--KTAER(1).-', '-.HKILFDR(2)--GEGVGAYNPQLNLKNVQR(14).-', '-.KIR(1)--YKFVDAVPDIFAQIEVNEK(2).-', '-.KTAER(1)--DMAKDYMER(4).-', '-.AQILAQKELPIDEDEEMK(7)--KIR(1).-', '-.KTAER(1)--PVFQLLEKQILSR(8).-', '-.KI…
24	85	-1283.16	S_02631	-.HKILFDR(2)--VVAAEEKNGVVFIR(7).-', '-.GEGVGAYNPQLNLKNVQR(14)--VVAAEEKNGVVFIR(7).-', '-.DMAKDYMER(4)--KTAER(1).-', '-.DWIKGWR(4)--WSKYK(3).-', '-.KTAER(1)--DYAAIVEQNLQHFKPVFQLLEK(14).-', '-.FSDKR(4)--KTAER(1).-', '-.HKILFDR(2)--GEGVGAYNPQLNLKNVQR(14).-', '-.KIR(1)--YKFVDAVPDIFAQIEVNEK(2).-', '-.KTAER(1)--DMAKDYMER(4).-', '-.AQILAQKELPIDEDEEMK(7)--KIR(1).-', '-.KTAER(1)--PVFQLLEKQILSR(8).-', '-.KI…
24	85	-1277.87	S_01209	-.HKILFDR(2)--VVAAEEKNGVVFIR(7).-', '-.GEGVGAYNPQLNLKNVQR(14)--VVAAEEKNGVVFIR(7).-', '-.DMAKDYMER(4)--KTAER(1).-', '-.DWIKGWR(4)--WSKYK(3).-', '-.KTAER(1)--DYAAIVEQNLQHFKPVFQLLEK(14).-', '-.FSDKR(4)--KTAER(1).-', '-.HKILFDR(2)--GEGVGAYNPQLNLKNVQR(14).-', '-.KIR(1)--YKFVDAVPDIFAQIEVNEK(2).-', '-.KTAER(1)--DMAKDYMER(4).-', '-.AQILAQKELPIDEDEEMK(7)--KIR(1).-', '-.KTAER(1)--PVFQLLEKQILSR(8).-', '-.KI…
24	85	-1225.8	S_02125	-.HKILFDR(2)--VVAAEEKNGVVFIR(7).-', '-.GEGVGAYNPQLNLKNVQR(14)--VVAAEEKNGVVFIR(7).-', '-.DMAKDYMER(4)--KTAER(1).-', '-.DWIKGWR(4)--WSKYK(3).-', '-.KTAER(1)--DYAAIVEQNLQHFKPVFQLLEK(14).-', '-.FSDKR(4)--KTAER(1).-', '-.HKILFDR(2)--GEGVGAYNPQLNLKNVQR(14).-', '-.KIR(1)--YKFVDAVPDIFAQIEVNEK(2).-', '-.KTAER(1)--DMAKDYMER(4).-', '-.AQILAQKELPIDEDEEMK(7)--KIR(1).-', '-.KTAER(1)--PVFQLLEKQILSR(8).-', '-.KI…
24	84	-1242.78	S_00232	-.HKILFDR(2)--VVAAEEKNGVVFIR(7).-', '-.GEGVGAYNPQLNLKNVQR(14)--VVAAEEKNGVVFIR(7).-', '-.DMAKDYMER(4)--KTAER(1).-', '-.DWIKGWR(4)--WSKYK(3).-', '-.KTAER(1)--DYAAIVEQNLQHFKPVFQLLEK(14).-', '-.FSDKR(4)--KTAER(1).-', '-.HKILFDR(2)--GEGVGAYNPQLNLKNVQR(14).-', '-.KIR(1)--YKFVDAVPDIFAQIEVNEK(2).-', '-.KTAER(1)--DMAKDYMER(4).-', '-.AQILAQKELPIDEDEEMK(7)--KIR(1).-', '-.KTAER(1)--PVFQLLEKQILSR(8).-', '-.KI…
24	84	-1227.31	S_02644	-.HKILFDR(2)--VVAAEEKNGVVFIR(7).-', '-.GEGVGAYNPQLNLKNVQR(14)--VVAAEEKNGVVFIR(7).-', '-.DMAKDYMER(4)--KTAER(1).-', '-.DWIKGWR(4)--WSKYK(3).-', '-.KTAER(1)--DYAAIVEQNLQHFKPVFQLLEK(14).-', '-.FSDKR(4)--KTAER(1).-', '-.HKILFDR(2)--GEGVGAYNPQLNLKNVQR(14).-', '-.KIR(1)--YKFVDAVPDIFAQIEVNEK(2).-', '-.KTAER(1)--DMAKDYMER(4).-', '-.AQILAQKELPIDEDEEMK(7)--KIR(1).-', '-.KTAER(1)--PVFQLLEKQILSR(8).-', '-.KI…
24	83	-1249.99	S_00457	-.HKILFDR(2)--VVAAEEKNGVVFIR(7).-', '-.GEGVGAYNPQLNLKNVQR(14)--VVAAEEKNGVVFIR(7).-', '-.DMAKDYMER(4)--KTAER(1).-', '-.DWIKGWR(4)--WSKYK(3).-', '-.KTAER(1)--DYAAIVEQNLQHFKPVFQLLEK(14).-', '-.FSDKR(4)--KTAER(1).-', '-.HKILFDR(2)--GEGVGAYNPQLNLKNVQR(14).-', '-.KIR(1)--YKFVDAVPDIFAQIEVNEK(2).-', '-.KTAER(1)--DMAKDYMER(4).-', '-.AQILAQKELPIDEDEEMK(7)--KIR(1).-', '-.KTAER(1)--PVFQLLEKQILSR(8).-', '-.KI…
24	83	-1211.92	S_01266	-.HKILFDR(2)--VVAAEEKNGVVFIR(7).-', '-.GEGVGAYNPQLNLKNVQR(14)--VVAAEEKNGVVFIR(7).-', '-.DMAKDYMER(4)--KTAER(1).-', '-.DWIKGWR(4)--WSKYK(3).-', '-.KTAER(1)--DYAAIVEQNLQHFKPVFQLLEK(14).-', '-.FSDKR(4)--KTAER(1).-', '-.HKILFDR(2)--GEGVGAYNPQLNLKNVQR(14).-', '-.KIR(1)--YKFVDAVPDIFAQIEVNEK(2).-', '-.KTAER(1)--DMAKDYMER(4).-', '-.AQILAQKELPIDEDEEMK(7)--KIR(1).-', '-.KTAER(1)--PVFQLLEKQILSR(8).-', '-.KI…
24	82	-1252.92	S_02716	-.HKILFDR(2)--VVAAEEKNGVVFIR(7).-', '-.GEGVGAYNPQLNLKNVQR(14)--VVAAEEKNGVVFIR(7).-', '-.DMAKDYMER(4)--KTAER(1).-', '-.DWIKGWR(4)--WSKYK(3).-', '-.KTAER(1)--DYAAIVEQNLQHFKPVFQLLEK(14).-', '-.FSDKR(4)--KTAER(1).-', '-.HKILFDR(2)--GEGVGAYNPQLNLKNVQR(14).-', '-.KIR(1)--YKFVDAVPDIFAQIEVNEK(2).-', '-.KTAER(1)--DMAKDYMER(4).-', '-.AQILAQKELPIDEDEEMK(7)--KIR(1).-', '-.KTAER(1)--PVFQLLEKQILSR(8).-', '-.KI…
24	82	-1237.24	S_02400	-.HKILFDR(2)--VVAAEEKNGVVFIR(7).-', '-.GEGVGAYNPQLNLKNVQR(14)--VVAAEEKNGVVFIR(7).-', '-.DMAKDYMER(4)--KTAER(1).-', '-.DWIKGWR(4)--WSKYK(3).-', '-.KTAER(1)--DYAAIVEQNLQHFKPVFQLLEK(14).-', '-.FSDKR(4)--KTAER(1).-', '-.HKILFDR(2)--GEGVGAYNPQLNLKNVQR(14).-', '-.KIR(1)--YKFVDAVPDIFAQIEVNEK(2).-', '-.KTAER(1)--DMAKDYMER(4).-', '-.AQILAQKELPIDEDEEMK(7)--KIR(1).-', '-.KTAER(1)--PVFQLLEKQILSR(8).-', '-.KI…
24	82	-1234.82	S_02343	-.HKILFDR(2)--VVAAEEKNGVVFIR(7).-', '-.GEGVGAYNPQLNLKNVQR(14)--VVAAEEKNGVVFIR(7).-', '-.DMAKDYMER(4)--KTAER(1).-', '-.DWIKGWR(4)--WSKYK(3).-', '-.KTAER(1)--DYAAIVEQNLQHFKPVFQLLEK(14).-', '-.FSDKR(4)--KTAER(1).-', '-.HKILFDR(2)--GEGVGAYNPQLNLKNVQR(14).-', '-.KIR(1)--YKFVDAVPDIFAQIEVNEK(2).-', '-.KTAER(1)--DMAKDYMER(4).-', '-.AQILAQKELPIDEDEEMK(7)--KIR(1).-', '-.KTAER(1)--PVFQLLEKQILSR(8).-', '-.KI…
24	82	-1232.92	S_01324	-.HKILFDR(2)--VVAAEEKNGVVFIR(7).-', '-.GEGVGAYNPQLNLKNVQR(14)--VVAAEEKNGVVFIR(7).-', '-.DMAKDYMER(4)--KTAER(1).-', '-.DWIKGWR(4)--WSKYK(3).-', '-.KTAER(1)--DYAAIVEQNLQHFKPVFQLLEK(14).-', '-.FSDKR(4)--KTAER(1).-', '-.HKILFDR(2)--GEGVGAYNPQLNLKNVQR(14).-', '-.KIR(1)--YKFVDAVPDIFAQIEVNEK(2).-', '-.KTAER(1)--DMAKDYMER(4).-', '-.AQILAQKELPIDEDEEMK(7)--KIR(1).-', '-.KTAER(1)--PVFQLLEKQILSR(8).-', '-.KI…
24	82	-1232.61	S_01164	-.HKILFDR(2)--VVAAEEKNGVVFIR(7).-', '-.GEGVGAYNPQLNLKNVQR(14)--VVAAEEKNGVVFIR(7).-', '-.DMAKDYMER(4)--KTAER(1).-', '-.DWIKGWR(4)--WSKYK(3).-', '-.KTAER(1)--DYAAIVEQNLQHFKPVFQLLEK(14).-', '-.FSDKR(4)--KTAER(1).-', '-.HKILFDR(2)--GEGVGAYNPQLNLKNVQR(14).-', '-.KIR(1)--YKFVDAVPDIFAQIEVNEK(2).-', '-.KTAER(1)--DMAKDYMER(4).-', '-.AQILAQKELPIDEDEEMK(7)--KIR(1).-', '-.KTAER(1)--PVFQLLEKQILSR(8).-', '-.KI…
24	82	-1230.72	S_00995	-.HKILFDR(2)--VVAAEEKNGVVFIR(7).-', '-.GEGVGAYNPQLNLKNVQR(14)--VVAAEEKNGVVFIR(7).-', '-.DMAKDYMER(4)--KTAER(1).-', '-.DWIKGWR(4)--WSKYK(3).-', '-.KTAER(1)--DYAAIVEQNLQHFKPVFQLLEK(14).-', '-.FSDKR(4)--KTAER(1).-', '-.HKILFDR(2)--GEGVGAYNPQLNLKNVQR(14).-', '-.KIR(1)--YKFVDAVPDIFAQIEVNEK(2).-', '-.KTAER(1)--DMAKDYMER(4).-', '-.AQILAQKELPIDEDEEMK(7)--KIR(1).-', '-.KTAER(1)--PVFQLLEKQILSR(8).-', '-.KI…
24	81	-1216.06	S_00855	-.HKILFDR(2)--VVAAEEKNGVVFIR(7).-', '-.GEGVGAYNPQLNLKNVQR(14)--VVAAEEKNGVVFIR(7).-', '-.DMAKDYMER(4)--KTAER(1).-', '-.DWIKGWR(4)--WSKYK(3).-', '-.KTAER(1)--DYAAIVEQNLQHFKPVFQLLEK(14).-', '-.FSDKR(4)--KTAER(1).-', '-.HKILFDR(2)--GEGVGAYNPQLNLKNVQR(14).-', '-.KIR(1)--YKFVDAVPDIFAQIEVNEK(2).-', '-.KTAER(1)--DMAKDYMER(4).-', '-.AQILAQKELPIDEDEEMK(7)--KIR(1).-', '-.KTAER(1)--PVFQLLEKQILSR(8).-', '-.KI…
24	78	-1276.3	S_02991	-.HKILFDR(2)--VVAAEEKNGVVFIR(7).-', '-.GEGVGAYNPQLNLKNVQR(14)--VVAAEEKNGVVFIR(7).-', '-.DMAKDYMER(4)--KTAER(1).-', '-.DWIKGWR(4)--WSKYK(3).-', '-.KTAER(1)--DYAAIVEQNLQHFKPVFQLLEK(14).-', '-.FSDKR(4)--KTAER(1).-', '-.HKILFDR(2)--GEGVGAYNPQLNLKNVQR(14).-', '-.KIR(1)--YKFVDAVPDIFAQIEVNEK(2).-', '-.KTAER(1)--DMAKDYMER(4).-', '-.AQILAQKELPIDEDEEMK(7)--KIR(1).-', '-.KTAER(1)--PVFQLLEKQILSR(8).-', '-.KI…
24	78	-1243.24	S_02297	-.HKILFDR(2)--VVAAEEKNGVVFIR(7).-', '-.GEGVGAYNPQLNLKNVQR(14)--VVAAEEKNGVVFIR(7).-', '-.DMAKDYMER(4)--KTAER(1).-', '-.DWIKGWR(4)--WSKYK(3).-', '-.KTAER(1)--DYAAIVEQNLQHFKPVFQLLEK(14).-', '-.FSDKR(4)--KTAER(1).-', '-.HKILFDR(2)--GEGVGAYNPQLNLKNVQR(14).-', '-.KIR(1)--YKFVDAVPDIFAQIEVNEK(2).-', '-.KTAER(1)--DMAKDYMER(4).-', '-.AQILAQKELPIDEDEEMK(7)--KIR(1).-', '-.KTAER(1)--PVFQLLEKQILSR(8).-', '-.KI…
24	77	-1272.29	S_01016	-.HKILFDR(2)--VVAAEEKNGVVFIR(7).-', '-.GEGVGAYNPQLNLKNVQR(14)--VVAAEEKNGVVFIR(7).-', '-.DMAKDYMER(4)--KTAER(1).-', '-.DWIKGWR(4)--WSKYK(3).-', '-.KTAER(1)--DYAAIVEQNLQHFKPVFQLLEK(14).-', '-.FSDKR(4)--KTAER(1).-', '-.HKILFDR(2)--GEGVGAYNPQLNLKNVQR(14).-', '-.KIR(1)--YKFVDAVPDIFAQIEVNEK(2).-', '-.KTAER(1)--DMAKDYMER(4).-', '-.AQILAQKELPIDEDEEMK(7)--KIR(1).-', '-.KTAER(1)--PVFQLLEKQILSR(8).-', '-.KI…
24	75	-1278.12	S_00153	-.HKILFDR(2)--VVAAEEKNGVVFIR(7).-', '-.GEGVGAYNPQLNLKNVQR(14)--VVAAEEKNGVVFIR(7).-', '-.DMAKDYMER(4)--KTAER(1).-', '-.DWIKGWR(4)--WSKYK(3).-', '-.KTAER(1)--DYAAIVEQNLQHFKPVFQLLEK(14).-', '-.FSDKR(4)--KTAER(1).-', '-.HKILFDR(2)--GEGVGAYNPQLNLKNVQR(14).-', '-.KIR(1)--YKFVDAVPDIFAQIEVNEK(2).-', '-.KTAER(1)--DMAKDYMER(4).-', '-.AQILAQKELPIDEDEEMK(7)--KIR(1).-', '-.KTAER(1)--PVFQLLEKQILSR(8).-', '-.KI…
24	73	-1244.77	S_01142	-.HKILFDR(2)--VVAAEEKNGVVFIR(7).-', '-.GEGVGAYNPQLNLKNVQR(14)--VVAAEEKNGVVFIR(7).-', '-.DMAKDYMER(4)--KTAER(1).-', '-.DWIKGWR(4)--WSKYK(3).-', '-.KTAER(1)--DYAAIVEQNLQHFKPVFQLLEK(14).-', '-.FSDKR(4)--KTAER(1).-', '-.HKILFDR(2)--GEGVGAYNPQLNLKNVQR(14).-', '-.KIR(1)--YKFVDAVPDIFAQIEVNEK(2).-', '-.KTAER(1)--DMAKDYMER(4).-', '-.AQILAQKELPIDEDEEMK(7)--KIR(1).-', '-.KTAER(1)--PVFQLLEKQILSR(8).-', '-.KI…
