# Supplementary material for: The structure of human dermatan sulfate epimerase 1 emphasizes the importance of C5-epimerization of glucuronic acid in higher organisms
Source: Chem Sci. 2020 Dec 8;12(5):1869–85. doi: 10.1039/d0sc05971d (PMC8006597; doi:10.1039/d0sc05971d)
Supplement: Supplementary file 9 [file SC-012-D0SC05971D-s009.xlsx]

## Sheet: Sheet1
Supplementary Table 5. Dali search results of DS-epi1 Rosetta models.
Model ID	PDB ID	Dali Z score	rmsd	lali	nres	%id	Description
2048	5ln3-Q	7.2	8.5	94	422	6	26S PROTEASOME NON-ATPASE REGULATORY SUBUNIT 2;
2306	4gou-A	6.5	3.4	81	507	11	EHRGS-RHOGEF;
2368	5nnr-A	6.5	9.8	76	666	8	N-TERMINAL ACETYLTRANSFERASE-LIKE PROTEIN;
450	3ibj-A	6.4	6.5	81	661	9	CGMP-DEPENDENT 3',5'-CYCLIC PHOSPHODIESTERASE;
144	6mzm-B	6.4	3	68	968	6	TRANSCRIPTION INITIATION FACTOR TFIID SUBUNIT 1,
2631	6hc2-C	6.4	5.8	57	367	5	G-PROTEIN-SIGNALING MODULATOR 2;
1567	6j67-A	6.3	7.5	135	203	10	TELOMERIC REPEAT-BINDING FACTOR 2;
2327	2gws-A	6.3	7.1	78	327	6	5'-D(*CP*GP*GP*CP*AP*GP*CP*GP*CP*AP*C)-3';
483	3fbz-D	6.3	15.2	66	122	5	PUTATIVE UNCHARACTERIZED PROTEIN;
2722	5m6u-A	6.1	5.9	112	916	11	PHOSPHATIDYLINOSITOL 4,5-BISPHOSPHATE 3-KINASE CA
1778	3opb-B	6.1	7	84	741	10	SWI5-DEPENDENT HO EXPRESSION PROTEIN 4;
2794	6ffc-A	6.1	9.8	115	572	7	ATP-BINDING CASSETTE SUB-FAMILY G MEMBER 2;
671	6f5d-J	6.1	7.1	78	164	4	ATP SYNTHASE SUBUNIT ALPHA, MITOCHONDRIAL;
153	4kvm-A	5.9	5.5	88	718	9	N-TERMINAL ACETYLTRANSFERASE A COMPLEX SUBUNIT NA
2632	5ijn-P	5.8	2.5	62	1028	5	NUCLEAR PORE COMPLEX PROTEIN NUP155;
30	5lj3-T	5.6	13.7	82	592	9	U5 SNRNA (SMALL NUCLEAR RNA);
241	6n7p-D	5.6	7.4	68	544	7	U1 SMALL NUCLEAR RIBONUCLEOPROTEIN 70 KDA HOMOLOG
2078	2hrt-A	5.6	5	119	1032	6	ACRIFLAVINE RESISTANCE PROTEIN B;
2124	6fcr-A	5.6	14.6	88	613	5	SOLUBLE LYTIC MUREIN TRANSGLYCOSYLASE;
2032	3jb9-R	5.6	10.9	69	575	4	PRE-MRNA-SPLICING FACTOR SPP42;
665	5luq-A	5.6	13.5	103	3725	3	DNA-DEPENDENT PROTEIN KINASE CATALYTIC SUBUNIT,DN
2595	5ld2-C	5.5	12.3	66	1121	12	RECBCD ENZYME SUBUNIT RECB,RECBCD ENZYME SUBUNIT
359	4mmc-A	5.5	3.1	75	504	7	TRANSPORTER;
2829	4mmc-A	5.4	2.7	62	504	10	TRANSPORTER;
2297	4ji3-T	5.4	5.2	69	99	9	16S RRNA;
1717	6krd-E	5.4	11.5	75	495	7	T-COMPLEX PROTEIN 1 SUBUNIT ALPHA;
2302	5jy0-A	5.4	13.2	91	683	5	ASP/GLU-SPECIFIC DIPEPTIDYL-PEPTIDASE;
1411	5oqo-A	5.3	2.8	75	817	11	CONDENSIN COMPLEX SUBUNIT 3;
1994	3kph-A	5.3	3.2	77	196	3	SUPERANTIGEN;
2832	2i2z-A	5.2	5.1	92	582	12	SERUM ALBUMIN;
2991	3lpz-A	5.2	11.9	58	314	10	GET4 (YOR164C HOMOLOG);
375	2gno-A	5.2	5.2	91	296	8	DNA POLYMERASE III, GAMMA SUBUNIT-RELATED PROTEIN
161	3ggz-B	5.2	3.1	63	186	8	INCREASED SODIUM TOLERANCE PROTEIN 1;
2714	2h9d-A	5.2	2.7	60	84	7	SALICYLATE BIOSYNTHESIS PROTEIN PCHB;
1392	6o85-B	5.2	3.1	80	590	6	TRANSLATION INITIATION FACTOR EIF-2B SUBUNIT EPSI
231	6oo3-D	5.2	6.1	80	601	5	TRPV2;
1707	2eyq-B	5.2	14.7	63	1143	5	TRANSCRIPTION-REPAIR COUPLING FACTOR;
2822	5o5j-T	5.2	3.1	65	85	3	16S RRNA;
1841	4lc1-B	5.1	5	78	308	12	METHYLMALONYL-COA MUTASE ACCESSORY PROTEIN;
2099	4g1t-A	5.1	11.2	78	426	12	INTERFERON-INDUCED PROTEIN WITH TETRATRICOPEPTIDE
1986	5gnc-A	5.1	4.7	59	597	10	AVH146;
1399	3may-B	5.1	3.4	54	93	6	POSSIBLE EXPORTED PROTEIN;
1136	3llw-B	5.1	4.3	86	288	5	GERANYLTRANSTRANSFERASE (ISPA);
1213	2fm9-A	5	7.7	64	201	8	CELL INVASION PROTEIN SIPA;
1892	2oer-A	5	6.5	84	179	8	PROBABLE TRANSCRIPTIONAL REGULATOR;
870	4kk1-E	5	8.3	75	391	7	TUBEROUS SCLEROSIS 1 PROTEIN HOMOLOG;
1577	5nro-A	5	4.9	88	603	6	CHAPERONE PROTEIN DNAK;
767	2ooe-A	5	6.5	78	528	5	CLEAVAGE STIMULATION FACTOR 77 KDA SUBUNIT;
2972	6h5w-A	5	6.1	97	586	5	ANGIOTENSIN-CONVERTING ENZYME;
2074	5hn8-A	5	6.5	68	321	4	FARNESYL PYROPHOSPHATE SYNTHASE, PUTATIVE;
973	1kxp-D	5	8.1	67	438	3	ACTIN,ALPHA SKELETAL MUSCLE;
2447	6o85-B	4.9	14.6	78	590	12	TRANSLATION INITIATION FACTOR EIF-2B SUBUNIT EPSI
2245	4i6z-A	4.9	4.3	78	200	10	TRANSCRIPTIONAL REGULATOR, TETR FAMILY;
413	6gej-T	4.9	5.8	86	443	9	VACUOLAR PROTEIN SORTING-ASSOCIATED PROTEIN 72;
2401	1gl7-F	4.9	13.6	95	413	8	CONJUGAL TRANSFER PROTEIN TRWB;
586	1i9y-A	4.9	3.6	45	336	7	PHOSPHATIDYLINOSITOL PHOSPHATE PHOSPHATASE;
2203	2lfs-B	4.9	2.4	53	111	6	UNCHARACTERIZED PROTEIN, OSMOLARITY SENSOR PROTEI
2481	3jd5-o	4.9	4.2	92	461	4	28S RIBOSOMAL RNA, MITOCHONDIAL;
265	5odw-C	4.9	6	90	195	3	FERRIPYOVERDINE RECEPTOR;
2919	6mrw-F	4.8	2.3	49	285	16	HEMOLYSIN E, CHROMOSOMAL;
403	2izz-C	4.8	8.7	78	276	8	PYRROLINE-5-CARBOXYLATE REDUCTASE 1;
581	3ibj-A	4.8	4.5	92	661	8	CGMP-DEPENDENT 3',5'-CYCLIC PHOSPHODIESTERASE;
1306	4f0u-D	4.8	4	87	161	7	ALLOPHYCOCYANIN ALPHA CHAIN;
1810	6ot5-C	4.8	10.5	95	623	7	TRANSIENT RECEPTOR POTENTIAL CATION CHANNEL SUBFA
172	5go2-D	4.8	3.5	65	87	6	PROTEIN AROA(G);
180	4l1b-A	4.8	8.9	94	994	5	PHOSPHATIDYLINOSITOL 4,5-BISPHOSPHATE 3-KINASE CA
855	6iyc-C	4.8	5.2	73	243	5	NICASTRIN;
318	3lz1-D	4.8	10.9	66	95	5	HISTONE H3,2;
1856	6ot5-A	4.8	12.2	96	623	2	TRANSIENT RECEPTOR POTENTIAL CATION CHANNEL SUBFA
555	3hw4-C	4.7	5.2	45	177	11	POLYMERASE ACIDIC PROTEIN;
1888	4kn4-Y	4.7	10.2	93	458	8	DNA-DIRECTED RNA POLYMERASE SUBUNIT ALPHA;
1730	3gjd-A	4.7	7.8	79	510	6	TRANSPORTER;
119	6mu1-A	4.7	14.8	93	2149	3	INOSITOL 1,4,5-TRISPHOSPHATE RECEPTOR TYPE 1;
472	4fyf-A	4.7	7.9	82	739	2	SIDF, INHIBITOR OF GROWTH FAMILY, MEMBER 3;
481	5ld2-C	4.6	13.5	91	1121	13	RECBCD ENZYME SUBUNIT RECB,RECBCD ENZYME SUBUNIT
71	5n90-A	4.6	7	81	849	9	CG9323, ISOFORM A;
2806	2mak-A	4.6	8.9	72	82	7	STROMAL INTERACTION MOLECULE 1;
1439	4om3-B	4.6	3.4	54	112	6	TRANSDUCIN-LIKE ENHANCER PROTEIN 1;
1553	6iol-I	4.6	6.7	64	332	5	MULTIDRUG RESISTANCE PROTEIN MEXA;
2703	4mrr-A	4.6	11.7	81	601	5	ABC TRANSPORTER RELATED PROTEIN;
2300	3ibe-A	4.5	3.7	88	850	10	PHOSPHATIDYLINOSITOL-4,5-BISPHOSPHATE 3-KINASE CA
244	1g6u-A	4.5	4.1	44	47	9	DOMAIN SWAPPED DIMER;
286	6pzk-D	4.5	3	53	55	9	RNA-DIRECTED RNA POLYMERASE L;
1090	6nf6-B	4.5	15.1	77	411	9	OTOPETRIN3;
260	3h1c-C	4.5	13	87	544	9	POLYRIBONUCLEOTIDE NUCLEOTIDYLTRANSFERASE;
1142	5h7i-2	4.5	6.1	88	591	8	DNA REPLICATION LICENSING FACTOR MCM2;
2465	4kk1-B	4.5	11.8	83	391	8	TUBEROUS SCLEROSIS 1 PROTEIN HOMOLOG;
2288	2n3t-A	4.5	10.2	66	131	6	26S PROTEASOME REGULATORY SUBUNIT RPN1;
2798	3jck-F	4.5	9	94	388	4	26S PROTEASOME REGULATORY SUBUNIT RPN3;
637	3jb9-R	4.5	15.2	83	575	1	PRE-MRNA-SPLICING FACTOR SPP42;
2310	3lof-F	4.4	4.4	65	80	14	HEAT SHOCK 70 KDA PROTEIN 1;
2904	2oee-B	4.4	8	55	93	13	UPF0342 PROTEIN YHEA;
2278	5jvs-A	4.4	6.9	61	65	13	CHIMERA PROTEIN OF KINESIN HEAVY CHAIN AND MICROT
1607	6pzk-D	4.4	2.5	50	55	12	RNA-DIRECTED RNA POLYMERASE L;
1616	4lgz-A	4.4	8	76	533	11	DELTA-1-PYRROLINE-5-CARBOXYLATE DEHYDROGENASE,
2948	5jk7-H	4.4	5.5	64	74	11	DNA DAMAGE-BINDING PROTEIN 1;
2200	3org-D	4.4	25.3	91	534	8	CMCLC;
1951	4n5c-B	4.4	13.6	77	741	8	CARGO-TRANSPORT PROTEIN YPP1;
2716	2lfs-B	4.4	4	51	111	6	UNCHARACTERIZED PROTEIN, OSMOLARITY SENSOR PROTEI
282	6pzk-D	4.4	2.4	51	55	6	RNA-DIRECTED RNA POLYMERASE L;
1156	5mq0-S	4.4	12.9	84	468	6	YEAST UBC4 GENE FOR UBIQUITIN-CONJUGATING ENZYME;
568	6j6n-d	4.4	12.2	63	566	2	PRE-MRNA-SPLICING FACTOR 8;
2444	5lcw-N	4.3	7.6	97	703	12	ANAPHASE-PROMOTING COMPLEX SUBUNIT 1;
2563	2oee-B	4.3	3.4	46	93	11	UPF0342 PROTEIN YHEA;
2529	5n8u-A	4.3	7.9	79	849	10	CG9323, ISOFORM A;
699	2oee-A	4.3	3.7	50	92	10	UPF0342 PROTEIN YHEA;
2830	3mdj-B	4.3	4.7	91	821	9	ENDOPLASMIC RETICULUM AMINOPEPTIDASE 1;
160	3org-D	4.3	12.4	79	534	8	CMCLC;
1148	5mmi-Z	4.3	6.3	64	101	6	50S RIBOSOMAL PROTEIN L31;
1	3hjl-A	4.3	4.1	56	321	5	FLAGELLAR MOTOR SWITCH PROTEIN FLIG;
2	3hjl-A	4.3	4.1	56	321	5	FLAGELLAR MOTOR SWITCH PROTEIN FLIG;
1712	5m52-B	4.3	5.3	89	1862	3	PRE-MRNA-SPLICING HELICASE BRR2;
1930	6qsk-F	4.3	10.6	75	294	3	GDP-MANNOSE TRANSPORTER 1;
1431	2ooe-A	4.3	16	80	528	1	CLEAVAGE STIMULATION FACTOR 77 KDA SUBUNIT;
1263	4ndk-B	4.2	4.1	67	272	13	E23P-YFP, GFP-LIKE FLUORESCENT CHROMOPROTEIN FP50
474	2gbo-B	4.2	3.9	48	82	13	UPF0358 PROTEIN EF2458;
256	1mb2-C	4.2	12.7	61	327	13	TRYPTOPHAN-TRNA LIGASE;
676	1kdx-A	4.2	3.6	60	81	12	CBP;
1295	3ljl-A	4.2	2.4	50	149	12	TRANSCRIPTIONAL REGULATOR LUXT;
772	5f4y-B	4.2	10.2	84	150	11	PROTEIN SHROOM2;
2090	2kph-A	4.2	4	90	142	9	PHEROMONE BINDING PROTEIN;
1701	5nnr-A	4.2	8.7	97	666	8	N-TERMINAL ACETYLTRANSFERASE-LIKE PROTEIN;
457	4onr-A	4.2	3.7	86	147	8	DECORIN-BINDING PROTEIN DBPA;
383	5kcm-B	4.2	6.6	63	512	6	(6-4) PHOTOLYASE;
97	4om3-B	4.2	4.2	48	112	6	TRANSDUCIN-LIKE ENHANCER PROTEIN 1;
1093	5f98-A	4.2	9.4	95	650	4	PROBABLE ATP-DEPENDENT RNA HELICASE DDX58;
193	1itz-C	4.2	8.4	69	666	4	TRANSKETOLASE;
829	6f38-e	4.2	12.4	82	926	2	ARP1 ACTIN RELATED PROTEIN 1 HOMOLOG A;
316	5l3s-A	4.1	4	60	274	13	SIGNAL RECOGNITION PARTICLE 54 KDA PROTEIN;
1968	6pzk-D	4.1	3.4	54	55	11	RNA-DIRECTED RNA POLYMERASE L;
1028	6gwh-A	4.1	8.5	76	440	9	MOP TRANSPORTER;
1209	5izt-B	4.1	4	103	207	8	OUTER SURFACE PROTEIN;
1665	1itz-C	4.1	16.9	77	666	8	TRANSKETOLASE;
1155	2ous-B	4.1	9.5	68	329	7	CAMP AND CAMP-INHIBITED CGMP 3',5'-CYCLIC
2530	4kmu-Y	4.1	5.7	101	458	6	DNA-DIRECTED RNA POLYMERASE SUBUNIT ALPHA;
1682	2lw9-A	4.1	4.2	49	51	6	UNCONVENTIONNAL MYOSIN-X;
2055	4mer-A	4.1	3.8	63	96	6	STREPTOCOCCAL HISTIDINE-RICH GLYCOPROTEIN INTERAC
2492	4jt5-A	4.1	11.5	88	1054	3	SERINE/THREONINE-PROTEIN KINASE MTOR;
1394	3j0j-B	4	4.9	71	561	13	V-TYPE ATP SYNTHASE ALPHA CHAIN;
565	1o9x-A	4	3.8	57	579	12	SERUM ALBUMIN;
15	2h3r-D	4	11.6	69	88	12	HYPOTHETICAL PROTEIN BQLF2;
1030	1iwo-B	4	5.9	88	994	8	SARCOPLASMIC/ENDOPLASMIC RETICULUM CALCIUM ATPASE
864	1itz-C	4	13.4	89	666	8	TRANSKETOLASE;
979	3nd8-A	4	7.5	76	510	7	V-TYPE ATP SYNTHASE ALPHA CHAIN;
1214	4jx4-D	4	17.4	90	594	7	PYRUVATE CARBOXYLASE;
1412	3opb-B	4	11.5	75	741	7	SWI5-DEPENDENT HO EXPRESSION PROTEIN 4;
1727	6icz-Q	4	5.5	78	1322	6	PROTEIN MAGO NASHI HOMOLOG 2;
126	5fbr-A	4	13.9	67	465	6	PHOSPHATIDYLINOSITOL 4-KINASE BETA,PHOSPHATIDYLIN
2975	6ofs-A	4	12	81	905	6	PROBABLE ZINC PROTEASE PQQL;
1165	6igx-B	4	6.7	60	730	3	CONDENSIN COMPLEX SUBUNIT 3;
1926	2lw9-B	3.9	2.3	46	51	15	UNCONVENTIONNAL MYOSIN-X;
2733	4jbs-B	3.9	7.9	78	854	13	ENDOPLASMIC RETICULUM AMINOPEPTIDASE 2;
2863	6h8e-B	3.9	3.4	40	53	13	TYPE VI SECRETION PROTEIN IMPA;
1999	3kxp-H	3.9	7.4	65	268	11	ALPHA-(N-ACETYLAMINOMETHYLENE)SUCCINIC ACID HYDRO
2867	6pzk-D	3.9	2.9	54	55	11	RNA-DIRECTED RNA POLYMERASE L;
79	5jbg-A	3.9	12.9	83	661	11	LGP2;
1076	5lbm-A	3.9	4.7	73	83	10	TRANSCRIPTIONAL REPRESSOR FRMR;
223	6pzk-D	3.9	4.1	52	55	10	RNA-DIRECTED RNA POLYMERASE L;
2400	2oee-B	3.9	3.7	46	93	9	UPF0342 PROTEIN YHEA;
111	3fvy-A	3.9	4.2	85	718	7	DIPEPTIDYL-PEPTIDASE 3;
1801	6h1t-B	3.9	3.5	84	456	7	BIFUNCTIONAL CYTOCHROME P450/NADPH--P450 REDUCTAS
1059	5iwa-B	3.9	10.6	64	225	5	30S RIBOSOMAL PROTEIN S2;
428	5owv-C	3.9	8	69	598	4	GTP-BINDING PROTEIN;
2686	2ftk-A	3.9	11.6	74	181	4	SPORULATION INITIATION PHOSPHOTRANSFERASE B;
1853	2oee-B	3.9	6	55	93	2	UPF0342 PROTEIN YHEA;
1336	5j6s-B	3.8	6.1	92	880	10	ENDOPLASMIC RETICULUM AMINOPEPTIDASE 2;
573	6ifn-A	3.8	5.6	79	733	10	TYPE III-A CRISPR-ASSOCIATED PROTEIN CSM1;
794	5nbz-A	3.8	4.9	90	237	10	WZZB;
48	3mdj-A	3.8	16.3	81	818	9	ENDOPLASMIC RETICULUM AMINOPEPTIDASE 1;
833	5hyn-H	3.8	5.4	68	124	4	HISTONE-LYSINE N-METHYLTRANSFERASE EZH2;
2308	1o1g-P	3.8	2.8	44	840	2	SKELETAL MUSCLE MYOSIN II;
2834	3l34-H	3.7	4.3	82	117	11	SENSOR PROTEIN;
2621	1gmg-A	3.7	4.3	50	55	10	REGULATORY PROTEIN ROP;
1347	6oo3-B	3.7	5	80	601	9	TRPV2;
2494	5ifo-A	3.7	10.7	82	582	9	SERUM ALBUMIN;
232	4i5l-D	3.7	11	98	582	8	SERINE/THREONINE-PROTEIN PHOSPHATASE 2A 65 KDA RE
2788	1l7x-B	3.7	7	61	795	7	GLYCOGEN PHOSPHORYLASE, LIVER FORM;
2997	4fyq-A	3.7	4.8	81	892	6	AMINOPEPTIDASE N;
1020	5m6u-A	3.7	4.1	97	916	6	PHOSPHATIDYLINOSITOL 4,5-BISPHOSPHATE 3-KINASE CA
349	6iu5-I	3.7	3.9	65	73	6	VIT1;
609	3j5r-C	3.7	6.5	94	592	3	TRANSIENT RECEPTOR POTENTIAL CATION CHANNEL SUBFA
1789	1gmg-A	3.6	3.3	47	55	13	REGULATORY PROTEIN ROP;
440	1itz-C	3.6	14.4	66	666	11	TRANSKETOLASE;
2589	3n24-F	3.6	3.3	63	114	8	SENSOR PROTEIN;
1105	5ero-C	3.6	4.1	73	299	7	FUSICOCCADIENE SYNTHASE;
1069	6j46-A	3.6	11.2	74	388	7	O-METHYLTRANSFERASE LEPI;
2125	1fzp-B	3.6	3.7	74	105	5	5'-D(P*AP*TP*AP*TP*AP*TP*A)-3';
2455	6jo6-F	3.6	8.6	73	165	3	PHOTOSYSTEM I P700 CHLOROPHYLL A APOPROTEIN A1;
1016	5mps-H	3.5	8	73	401	8	YEAST UBC4 GENE FOR UBIQUITIN-CONJUGATING ENZYME;
2995	4ksa-A	3.5	4.3	76	437	8	MALONYL-COA DECARBOXYLASE;
589	5ijf-A	3.5	5.1	92	572	7	SERUM ALBUMIN;
2515	3mli-B	3.5	4.1	61	85	3	PUTATIVE UNCHARACTERIZED PROTEIN;
727	5osb-D	3.4	4.5	76	313	11	PROTON-GATED ION CHANNEL,GAMMA-AMINOBUTYRIC ACID
1645	2iaz-B	3.4	6.2	71	113	10	HYPOTHETICAL PROTEIN SP1372;
1266	6gjz-A	3.4	12.6	84	682	5	INTERFERON-INDUCED HELICASE C DOMAIN-CONTAINING P
897	4mrv-B	3.4	5.4	69	598	4	ABC TRANSPORTER RELATED PROTEIN;
1602	4ne1-e	3.3	9.8	66	105	9	DNA (26-MER);
407	5gar-M	3.3	13.3	80	319	9	V-TYPE ATP SYNTHASE ALPHA CHAIN;
843	2hr2-D	3.3	3.3	51	157	8	HYPOTHETICAL PROTEIN;
893	5na8-B	3.3	4.4	94	649	4	PUTATIVE DIPEPTIDYL-PEPTIDASE III;
1164	5nis-A	3.3	10.2	81	550	4	NEUTRAL TREHALASE;
1802	5eul-Y	3.2	9.2	51	380	8	PROTEIN TRANSLOCASE SUBUNIT SECA, INSERTION PEPTI
331	6krd-E	3.2	9.8	54	495	6	T-COMPLEX PROTEIN 1 SUBUNIT ALPHA;
1662	6i1l-A	3.1	14.6	87	1277	13	CRISPR-ASSOCIATED ENDONUCLEASE CAS12A;
2087	4odx-Y	3.1	4.1	55	153	7	4E10 EPITOPE SCAFFOLD T117;
761	3lu7-A	3	5.1	82	578	9	SERUM ALBUMIN;
2325	4hr1-B	3	3.6	77	119	6	PUTATIVE UNCHARACTERIZED PROTEIN;
854	4ndy-J	3	9.4	61	93	3	DNA (26-MER);
2236	6gml-V	3	11.5	83	483	1	DNA-DIRECTED RNA POLYMERASE SUBUNIT;
1736	6f5d-J	2.9	4.8	67	164	10	ATP SYNTHASE SUBUNIT ALPHA, MITOCHONDRIAL;
1151	1n20-A	2.9	17.4	87	532	9	(+)-BORNYL DIPHOSPHATE SYNTHASE;
2343	6n67-A	2.8	9.4	64	388	9	TRNA LIGASE;
1573	1etx-A	2.8	9.2	58	74	7	FACTOR FOR INVERSION STIMULATION;
292	6mbl-A	2.8	2.8	58	482	7	ACTIN PEPTIDE;
995	2l9s-B	2.8	3.4	70	94	6	PHD FINGER PROTEIN 12;
2644	1gdj-A	2.7	4.1	71	153	4	LEGHEMOGLOBIN (DEOXY);
446	2ooe-A	2.7	19.5	68	528	3	CLEAVAGE STIMULATION FACTOR 77 KDA SUBUNIT;
1324	5nzu-B	2.6	12.2	81	798	11	COATOMER SUBUNIT ALPHA;
2209	4ovu-A	2.6	4.2	76	1044	8	PHOSPHATIDYLINOSITOL 4,5-BISPHOSPHATE 3-KINASE CA
1483	6g7e-B	2.6	3.4	100	1575	5	HELICASE-LIKE PROTEIN;
154	6qsk-F	2.6	6.1	76	294	1	GDP-MANNOSE TRANSPORTER 1;
1661	3hgw-B	2.5	4.2	63	74	3	SALICYLATE BIOSYNTHESIS PROTEIN PCHB;
542	4jng-C	2.5	4.1	80	224	3	RNA (42-MER);
2151	3nd2-A	2.4	11.8	79	861	11	IMPORTIN SUBUNIT BETA-1;
1527	6o1p-A	2.3	8.6	86	612	5	TRANSIENT RECEPTOR POTENTIAL CATION CHANNEL SUBFA
1928	6hs7-B	2	3.3	95	478	11	IMCF-LIKE FAMILY PROTEIN;
