# Supplementary material for: The structure of human dermatan sulfate epimerase 1 emphasizes the importance of C5-epimerization of glucuronic acid in higher organisms
Source: Chem Sci. 2020 Dec 8;12(5):1869–85. doi: 10.1039/d0sc05971d (PMC8006597; doi:10.1039/d0sc05971d)
Supplement: Supplementary file 10 [file SC-012-D0SC05971D-s010.xlsx]

## Sheet: Correct
Supplementary Table 6. DS-epi2 Blast hits.
Name	Species	ID	Taxonomy ID	Length (aa)	% identity	alignment length	mismatches	gap opens	query start	query end	subject start	subject end	evalue	bit score	% positives	Comment
dermatan-sulfate epimerase-like protein	Pan troglodytes	XP_523962.1	9598	1222	100	280	0	0	1	280	731	1010	0	584	100
RecName: Full=Dermatan-sulfate epimerase-like protein; Flags: Precursor	Homo sapiens	Q8IZU8.2	9606	1212	100	280	0	0	1	280	721	1000	0	584	100
PREDICTED: dermatan-sulfate epimerase-like protein	Nomascus leucogenys	XP_003264373.1	61853	1222	100	280	0	0	1	280	731	1010	0	584	100
PREDICTED: dermatan-sulfate epimerase-like protein	Gorilla gorilla gorilla	XP_004059576.1	9595	1222	99.643	280	1	0	1	280	731	1010	0	582	99.64
LOW QUALITY PROTEIN: dermatan-sulfate epimerase-like protein	Pan paniscus	XP_003827331.1	9597	1222	99.643	280	1	0	1	280	731	1010	0	582	99.64
PREDICTED: dermatan-sulfate epimerase-like protein	Mandrillus leucophaeus	XP_011855591.1	9568	1222	98.929	280	3	0	1	280	731	1010	0	579	99.29
PREDICTED: dermatan-sulfate epimerase-like protein	Colobus angolensis palliatus	XP_011799465.1	336983	1212	98.929	280	3	0	1	280	721	1000	0	580	99.64
PREDICTED: dermatan-sulfate epimerase-like protein	Cercocebus atys	XP_011924585.1	9531	1222	98.571	280	4	0	1	280	731	1010	0	577	99.29
PREDICTED: dermatan-sulfate epimerase-like protein	Macaca fascicularis	XP_005586549.1	9541	1222	98.571	280	4	0	1	280	731	1010	0	578	99.29
PREDICTED: dermatan-sulfate epimerase-like protein	Macaca mulatta	XP_014977670.1	9544	1222	98.571	280	4	0	1	280	731	1010	0	578	99.29
dermatan-sulfate epimerase-like protein	Macaca nemestrina	XP_011731564.1	9545	1222	98.571	280	4	0	1	280	731	1010	0	578	99.29
dermatan-sulfate epimerase-like protein	Papio anubis	XP_003914515.2	9555	1222	98.571	280	4	0	1	280	731	1010	0	577	99.29
dermatan-sulfate epimerase-like protein	Pongo abelii	XP_002828344.2	9601	1222	98.571	280	4	0	1	280	731	1010	0	578	98.93
PREDICTED: dermatan-sulfate epimerase-like protein	Chlorocebus sabaeus	XP_008012019.1	60711	1222	98.571	280	4	0	1	280	731	1010	0	575	98.93
PREDICTED: dermatan-sulfate epimerase-like protein	Rhinopithecus bieti	XP_017722577.1	61621	1212	98.571	280	4	0	1	280	721	1000	0	578	99.29
PREDICTED: dermatan-sulfate epimerase-like protein	Rhinopithecus roxellana	XP_010357198.1	61622	1212	98.571	280	4	0	1	280	721	1000	0	578	99.29
dermatan-sulfate epimerase-like protein	Piliocolobus tephrosceles	XP_023079938.1	591936	1222	98.571	280	4	0	1	280	731	1010	0	576	98.93
dermatan-sulfate epimerase-like protein	Aotus nancymaae	XP_012320811.1	37293	1222	96.429	280	10	0	1	280	731	1010	0	566	98.21
PREDICTED: dermatan-sulfate epimerase-like protein	Callithrix jacchus	XP_008978197.1	9483	1222	95.714	280	12	0	1	280	731	1010	0	542	97.86
PREDICTED: dermatan-sulfate epimerase-like protein	Cebus capucinus imitator	XP_017362854.1	1737458	1222	95.357	280	13	0	1	280	731	1010	0	539	97.5
PREDICTED: dermatan-sulfate epimerase-like protein	Saimiri boliviensis boliviensis	XP_003926053.1	39432	1222	95	280	14	0	1	280	731	1010	0	540	97.86
dermatan-sulfate epimerase-like protein	Otolemur garnettii	XP_003788454.1	30611	1221	94.286	280	16	0	1	280	731	1010	0	541	97.86
PREDICTED: dermatan-sulfate epimerase-like protein	Propithecus coquereli	XP_012505570.1	379532	1212	93.571	280	18	0	1	280	721	1000	5.23e-179	535	97.86
dermatan-sulfate epimerase-like protein	Carlito syrichta	XP_008055344.1	1868482	1220	93.571	280	16	1	1	280	731	1008	3.65e-176	527	96.79
dermatan-sulfate epimerase-like protein	Equus caballus	XP_014583352.1	9796	1212	93.214	280	19	0	1	280	721	1000	1.87e-169	509	96.07
PREDICTED: dermatan-sulfate epimerase-like protein	Equus przewalskii	XP_008535986.1	9798	1212	92.857	280	20	0	1	280	721	1000	2.19e-176	528	96.07
PREDICTED: dermatan-sulfate epimerase-like protein	Tupaia chinensis	XP_006147285.1	246437	1220	92.5	280	21	0	1	280	729	1008	1.09e-175	526	96.07
PREDICTED: LOW QUALITY PROTEIN: dermatan-sulfate epimerase-like protein	Equus asinus	XP_014720542.1	9793	1212	92.143	280	22	0	1	280	721	1000	1.95e-167	504	95.36
dermatan-sulfate epimerase-like protein	Microcebus murinus	XP_020137799.1	30608	1212	92.143	280	22	0	1	280	721	1000	3.59e-177	530	97.14
PREDICTED: dermatan-sulfate epimerase-like protein	Galeopterus variegatus	XP_008577962.1	482537	1212	92.143	280	22	0	1	280	721	1000	7.13e-176	526	97.14
dermatan-sulfate epimerase-like protein	Canis lupus familiaris	XP_022269286.1	9615	1212	91.786	280	23	0	1	280	721	1000	6.32e-175	524	95
PREDICTED: dermatan-sulfate epimerase-like protein	Odobenus rosmarus divergens	XP_004416696.1	9708	1212	91.786	280	23	0	1	280	721	1000	4.1e-173	519	94.29
PREDICTED: dermatan-sulfate epimerase-like protein isoform X1	Oryctolagus cuniculus	XP_017199715.1	9986	1212	91.786	280	23	0	1	280	721	1000	7.83e-175	523	96.43
PREDICTED: dermatan-sulfate epimerase-like protein	Ceratotherium simum simum	XP_004422683.1	73337	1212	91.786	280	23	0	1	280	721	1000	3.05e-174	522	95.36
dermatan-sulfate epimerase-like protein	Loxodonta africana	XP_023399510.1	9785	1229	91.429	280	24	0	1	280	738	1017	1.66e-173	521	95.71
PREDICTED: dermatan-sulfate epimerase-like protein	Marmota marmota marmota	XP_015355055.1	9994	1212	91.429	280	24	0	1	280	721	1000	1.28e-171	515	95
dermatan-sulfate epimerase-like protein	Trichechus manatus latirostris	XP_004389510.1	127582	1212	91.429	280	24	0	1	280	721	1000	1.67e-174	523	96.43
PREDICTED: dermatan-sulfate epimerase-like protein	Ursus maritimus	XP_008684099.1	29073	1212	91.071	280	25	0	1	280	721	1000	9.18e-174	521	95
dermatan-sulfate epimerase-like protein	Castor canadensis	XP_020008820.1	51338	1212	91.071	280	25	0	1	280	721	1000	1.18e-176	528	96.79
PREDICTED: dermatan-sulfate epimerase-like protein	Leptonychotes weddellii	XP_006727158.1	9713	1212	90.714	280	26	0	1	280	721	1000	8.31e-173	518	93.93
PREDICTED: dermatan-sulfate epimerase-like protein	Ochotona princeps	XP_004579497.1	9978	1212	90.714	280	26	0	1	280	721	1000	7.93e-176	526	97.14
PREDICTED: dermatan-sulfate epimerase-like protein	Orycteropus afer afer	XP_007933674.1	1230840	1212	90.714	280	26	0	1	280	721	1000	2.39e-171	514	95.36
dermatan-sulfate epimerase-like protein	Enhydra lutris kenyoni	XP_022369517.1	391180	1212	90.357	280	27	0	1	280	721	1000	5.66e-167	503	93.93
LOW QUALITY PROTEIN: dermatan-sulfate epimerase-like protein	Neomonachus schauinslandi	XP_021542083.1	29088	1212	90	280	28	0	1	280	721	1000	8.61e-171	513	93.21
PREDICTED: dermatan-sulfate epimerase-like protein	Ailuropoda melanoleuca	XP_002922099.1	9646	1212	89.643	280	29	0	1	280	721	1000	1.61e-171	515	94.29
LOW QUALITY PROTEIN: dermatan-sulfate epimerase-like protein	Dasypus novemcinctus	XP_012374500.1	9361	1212	88.929	280	31	0	1	280	721	1000	2.31e-169	509	94.29
PREDICTED: dermatan-sulfate epimerase-like protein	Mustela putorius furo	XP_004745672.1	9669	1222	88.929	280	31	0	1	280	731	1010	1.01e-163	495	93.21
PREDICTED: dermatan-sulfate epimerase-like protein	Panthera pardus	XP_019288116.1	9691	1212	88.929	280	31	0	1	280	721	1000	3.97e-168	506	92.86
PREDICTED: dermatan-sulfate epimerase-like protein	Acinonyx jubatus	XP_014938672.1	32536	1212	88.929	280	31	0	1	280	721	1000	3.62e-169	509	93.21
PREDICTED: dermatan-sulfate epimerase-like protein	Panthera tigris altaica	XP_007084811.1	74533	1212	88.929	280	31	0	1	280	721	1000	1.88e-168	507	92.86
PREDICTED: dermatan-sulfate epimerase-like protein	Hipposideros armiger	XP_019484789.1	186990	1212	88.929	280	31	0	1	280	721	1000	1.65e-168	507	94.29
PREDICTED: dermatan-sulfate epimerase-like protein	Manis javanica	XP_017504350.1	9974	1212	88.571	280	32	0	1	280	721	1000	1.88e-165	499	92.86
dermatan-sulfate epimerase-like protein	Heterocephalus glaber	XP_004858517.1	10181	1212	88.571	280	32	0	1	280	721	1000	1.41e-171	515	96.43
PREDICTED: dermatan-sulfate epimerase-like protein	Rhinolophus sinicus	XP_019584899.1	89399	1212	88.571	280	32	0	1	280	721	1000	7.57e-158	479	93.93
PREDICTED: dermatan-sulfate epimerase-like protein	Orcinus orca	XP_004268124.1	9733	1212	88.214	280	33	0	1	280	721	1000	1.15e-167	505	93.57
dermatan-sulfate epimerase-like protein	Delphinapterus leucas	XP_022440016.1	9749	1212	88.214	280	33	0	1	280	721	1000	4.62e-167	503	93.21
PREDICTED: dermatan-sulfate epimerase-like protein	Vicugna pacos	XP_006198110.1	30538	1212	88.214	280	33	0	1	280	721	1000	5.5e-166	501	93.21
dermatan-sulfate epimerase-like protein	Neophocaena asiaeorientalis asiaeorientalis	XP_024610665.1	1706337	1212	88.214	280	33	0	1	280	721	1000	2.44e-167	504	93.21
PREDICTED: dermatan-sulfate epimerase-like protein	Camelus bactrianus	XP_010945349.1	9837	1212	88.214	280	33	0	1	280	731	1010	1.57e-172	499	92.86
PREDICTED: dermatan-sulfate epimerase-like protein	Nannospalax galili	XP_008827677.1	1026970	1217	88.172	279	33	0	1	279	726	1004	3.47e-164	496	93.19
dermatan-sulfate epimerase-like protein	Pteropus alecto	XP_006913792.1	9402	1212	87.857	280	34	0	1	280	721	1000	5.11e-158	480	93.21
dermatan-sulfate epimerase-like protein	Felis catus	XP_003995301.1	9685	1212	87.857	280	34	0	1	280	721	1000	7.29e-168	506	92.86
PREDICTED: dermatan-sulfate epimerase-like protein	Tursiops truncatus	XP_004325409.2	9739	1212	87.857	280	34	0	1	280	721	1000	1.1e-166	503	92.86
PREDICTED: dermatan-sulfate epimerase-like protein	Camelus dromedarius	XP_010991813.1	9838	1212	87.857	280	34	0	1	280	721	1000	4.54e-166	501	92.5
PREDICTED: dermatan-sulfate epimerase-like protein	Jaculus jaculus	XP_004654867.1	51337	1211	87.857	280	34	0	1	280	720	999	8.55e-168	505	95
PREDICTED: dermatan-sulfate epimerase-like protein	Myotis brandtii	XP_014391369.1	109478	1212	87.857	280	34	0	1	280	721	1000	5.56e-158	480	94.29
PREDICTED: dermatan-sulfate epimerase-like protein-like	Lipotes vexillifer	XP_007460544.1	118797	1212	87.857	280	34	0	1	280	721	1000	1.66e-166	502	92.86
dermatan-sulfate epimerase-like protein	Pteropus vampyrus	XP_011364339.1	132908	1212	87.857	280	34	0	1	280	721	1000	5e-158	480	93.21
PREDICTED: dermatan-sulfate epimerase-like protein	Myotis davidii	XP_006761994.1	225400	1212	87.857	280	34	0	1	280	721	1000	4.77e-157	478	94.29
PREDICTED: dermatan-sulfate epimerase-like protein	Camelus ferus	XP_006192541.1	419612	1212	87.857	280	34	0	1	280	721	1000	2.27e-166	501	92.86
PREDICTED: dermatan-sulfate epimerase-like protein	Fukomys damarensis	XP_010633740.1	885580	1212	87.857	280	34	0	1	280	721	1000	5.21e-169	508	95.36
dermatan-sulfate epimerase-like protein	Sus scrofa	XP_020955044.1	9823	1212	87.5	280	35	0	1	280	721	1000	3.53e-164	496	92.5
PREDICTED: dermatan-sulfate epimerase-like protein	Cricetulus griseus	XP_003508508.1	10029	1207	87.5	280	35	0	1	280	716	995	6.74e-164	495	93.57
dermatan-sulfate epimerase-like protein	Octodon degus	XP_004638304.1	10160	1211	87.5	280	35	0	1	280	721	1000	1.99e-166	502	94.29
PREDICTED: dermatan-sulfate epimerase-like protein	Eptesicus fuscus	XP_008158780.1	29078	1212	87.5	280	35	0	1	280	721	1000	8.33e-158	479	93.57
PREDICTED: dermatan-sulfate epimerase-like protein	Sorex araneus	XP_004602037.1	42254	1213	87.189	281	35	1	1	280	721	1001	1.19e-163	494	93.24
PREDICTED: dermatan-sulfate epimerase-like protein	Rousettus aegyptiacus	XP_015985549.1	9407	1212	87.143	280	36	0	1	280	721	1000	7.25e-158	479	92.86
PREDICTED: dermatan-sulfate epimerase-like protein	Chinchilla lanigera	XP_005373100.1	34839	1212	87.143	280	36	0	1	280	721	1000	1.28e-165	499	93.57
dermatan-sulfate epimerase-like protein	Desmodus rotundus	XP_024436279.1	9430	1212	86.786	280	37	0	1	280	721	1000	1.25e-155	474	93.21
dermatan-sulfate epimerase-like protein	Mesocricetus auratus	XP_012973942.1	10036	1207	86.786	280	37	0	1	280	716	995	2.16e-162	491	92.5
dermatan-sulfate epimerase-like protein	Myotis lucifugus	XP_023608432.1	59463	1212	86.786	280	37	0	1	280	721	1000	2.08e-155	473	93.21
PREDICTED: dermatan-sulfate epimerase-like protein	Condylura cristata	XP_004684083.1	143302	1210	86.786	280	37	0	1	280	721	1000	1.84e-156	476	93.57
PREDICTED: dermatan-sulfate epimerase-like protein isoform X1	Balaenoptera acutorostrata scammoni	XP_007189998.1	310752	1212	86.786	280	37	0	1	280	721	1000	1.03e-165	500	93.57
dermatan-sulfate epimerase-like protein precursor	Mus musculus	NP_001074785.1	10090	1207	86.429	280	38	0	1	280	716	995	1.5e-163	494	93.57
PREDICTED: dermatan-sulfate epimerase-like protein	Echinops telfairi	XP_004703098.1	9371	1212	86.071	280	39	0	1	280	721	1000	4.06e-163	493	92.14
dermatan-sulfate epimerase-like protein isoform X1	Physeter catodon	XP_007118890.1	9755	1212	86.071	280	39	0	1	280	721	1000	3.8e-164	496	92.5
dermatan-sulfate epimerase-like protein	Mus caroli	XP_021025896.1	10089	1207	86.071	280	39	0	1	280	716	995	1.05e-162	492	93.21
dermatan-sulfate epimerase-like protein	Cavia porcellus	XP_003466559.1	10141	1041	86.071	280	39	0	1	280	550	829	1.22e-165	495	93.21
PREDICTED: dermatan-sulfate epimerase-like protein-like	Chrysochloris asiatica	XP_006837613.1	185453	1212	86.071	280	39	0	1	280	721	1000	8.17e-166	500	93.57
PREDICTED: dermatan-sulfate epimerase-like protein	Peromyscus maniculatus bairdii	XP_006994575.1	230844	1207	86.071	280	39	0	1	280	716	995	9.61e-162	489	93.21
dermatan-sulfate epimerase-like protein	Mus pahari	XP_021054048.1	10093	1207	85.714	280	40	0	1	280	716	995	3.45e-162	491	93.21
dermatan-sulfate epimerase-like protein precursor	Rattus norvegicus	NP_001292210.1	10116	1208	85.053	281	41	1	1	280	716	996	4.95e-159	483	92.17
PREDICTED: dermatan-sulfate epimerase-like protein	Elephantulus edwardii	XP_006892805.1	28737	412	85	200	30	0	81	280	1	200	7.25e-113	340	90
PREDICTED: dermatan-sulfate epimerase-like protein	Microtus ochrogaster	XP_013209772.1	79684	1206	85	280	42	0	1	280	715	994	3.34e-160	485	91.79
PREDICTED: dermatan-sulfate epimerase-like protein	Ovis aries musimon	XP_012025669.1	9938	1212	85	280	42	0	1	280	731	1010	1.82e-165	481	91.07
PREDICTED: dermatan-sulfate epimerase-like protein	Ovis aries	XP_004020453.1	9940	1212	84.643	280	43	0	1	280	721	1000	6.68e-159	482	91.07
PREDICTED: dermatan-sulfate epimerase-like protein	Pantholops hodgsonii	XP_005981162.1	59538	1212	84.643	280	43	0	1	280	721	1000	9.41e-160	484	90.71
PREDICTED: dermatan-sulfate epimerase-like protein	Capra hircus	XP_017895192.1	9925	1212	84.286	280	44	0	1	280	721	1000	1.55e-158	481	91.07
dermatan-sulfate epimerase-like protein precursor	Bos taurus	NP_001193390.1	9913	1212	83.929	280	45	0	1	280	721	1000	3.13e-158	481	91.07
PREDICTED: dermatan-sulfate epimerase-like protein	Bison bison bison	XP_010860619.1	43346	1212	83.929	280	45	0	1	280	721	1000	3.44e-158	480	91.07
PREDICTED: dermatan-sulfate epimerase-like protein-like isoform X1	Bubalus bubalis	XP_006074276.1	89462	1212	83.929	280	45	0	1	280	721	1000	3.84e-159	483	91.43
dermatan-sulfate epimerase-like protein	Odocoileus virginianus texanus	XP_020752369.1	9880	1212	83.571	280	46	0	1	280	721	1000	1.16e-157	479	90.36
PREDICTED: dermatan-sulfate epimerase-like protein	Bos indicus	XP_019842441.1	9915	1212	83.571	280	46	0	1	280	721	1000	2.17e-157	478	90.71
PREDICTED: dermatan-sulfate epimerase-like protein	Dipodomys ordii	XP_012874369.1	10020	1206	83.571	280	46	0	1	280	720	999	4.04e-159	483	92.5
PREDICTED: dermatan-sulfate epimerase-like protein isoform X1	Bos mutus	XP_005903826.1	72004	1212	83.571	280	46	0	1	280	721	1000	3.47e-157	478	90.71
dermatan-sulfate epimerase-like protein	Meriones unguiculatus	XP_021520214.1	10047	1207	82.857	280	48	0	1	280	716	995	3.53e-156	475	90.71
PREDICTED: dermatan-sulfate epimerase-like protein	Erinaceus europaeus	XP_007523874.1	9365	1210	82.562	281	45	2	1	280	721	998	7.64e-152	464	89.68
PREDICTED: dermatan-sulfate epimerase-like protein	Miniopterus natalensis	XP_016067451.1	291302	1212	81.786	280	51	0	1	280	721	1000	1.05e-143	442	90
LOW QUALITY PROTEIN: dermatan-sulfate epimerase-like protein	Sarcophilus harrisii	XP_003760137.2	9305	1227	77.465	284	60	1	1	280	732	1015	1.27e-141	437	86.62
dermatan-sulfate epimerase-like protein	Phascolarctos cinereus	XP_020841277.1	38626	1216	77.113	284	61	1	1	280	721	1004	1.75e-142	439	86.27
PREDICTED: LOW QUALITY PROTEIN: dermatan-sulfate epimerase-like protein	Monodelphis domestica	XP_016288109.1	13616	875	76.761	284	62	1	1	280	380	663	8.65e-146	439	85.92
PREDICTED: dermatan-sulfate epimerase-like protein	Chelonia mydas	XP_007066769.1	8469	1216	70.07	284	81	1	1	280	721	1004	5.17e-130	407	83.45
dermatan-sulfate epimerase-like protein	Pelodiscus sinensis	XP_006118186.1	13735	1212	70.07	284	81	1	1	280	717	1000	2.44e-134	418	83.8
dermatan-sulfate epimerase-like protein	Alligator sinensis	XP_006028604.1	38654	1216	69.366	284	83	1	1	280	721	1004	3.16e-118	375	84.51
dermatan-sulfate epimerase-like protein	Chrysemys picta bellii	XP_023957845.1	8478	1216	69.014	284	84	1	1	280	721	1004	3.65e-129	404	83.45
PREDICTED: dermatan-sulfate epimerase-like protein	Apteryx australis mantelli	XP_013797788.1	202946	1216	69.014	284	84	1	1	280	721	1004	1.46e-128	403	84.86
dermatan-sulfate epimerase-like protein	Terrapene mexicana triunguis	XP_024062043.1	1415176	1216	69.014	284	84	1	1	280	721	1004	6.71e-129	404	83.45
PREDICTED: dermatan-sulfate epimerase-like protein	Alligator mississippiensis	XP_006260584.1	8496	1216	68.662	284	85	1	1	280	721	1004	1.08e-117	374	84.51
PREDICTED: dermatan-sulfate epimerase-like protein	Crocodylus porosus	XP_019400866.1	8502	1216	68.662	284	85	1	1	280	721	1004	2.6e-117	373	83.8
PREDICTED: LOW QUALITY PROTEIN: dermatan-sulfate epimerase-like protein	Taeniopygia guttata	XP_004175804.2	59729	830	68.639	169	53	0	112	280	450	618	4.84e-67	232	86.98
PREDICTED: dermatan-sulfate epimerase-like protein	Gavialis gangeticus	XP_019380252.1	94835	1216	67.958	284	87	1	1	280	721	1004	7.05e-116	369	83.45
PREDICTED: dermatan-sulfate epimerase-like protein	Haliaeetus albicilla	XP_009920907.1	8969	1226	67.606	284	88	1	1	280	721	1004	1.3e-127	400	83.8
PREDICTED: dermatan-sulfate epimerase-like protein	Fulmarus glacialis	XP_009579804.1	30455	1216	67.606	284	88	1	1	280	721	1004	6.17e-129	404	84.51
PREDICTED: dermatan-sulfate epimerase-like protein	Haliaeetus leucocephalus	XP_010581644.1	52644	1226	67.606	284	88	1	1	280	721	1004	5.07e-127	399	83.8
PREDICTED: dermatan-sulfate epimerase-like protein	Tinamus guttatus	XP_010214571.1	94827	1216	67.606	284	88	1	1	280	721	1004	8.61e-128	401	84.15
PREDICTED: dermatan-sulfate epimerase-like protein	Aquila chrysaetos canadensis	XP_011589275.1	216574	1216	67.606	284	88	1	1	280	721	1004	7.05e-128	401	84.15
PREDICTED: dermatan-sulfate epimerase-like protein	Struthio camelus australis	XP_009671472.1	441894	1216	67.606	284	88	1	1	280	721	1004	2.77e-126	397	84.51
PREDICTED: dermatan-sulfate epimerase-like protein	Anolis carolinensis	XP_003219769.2	28377	1220	67.5	280	91	0	1	280	721	1000	4.96e-128	402	83.57
PREDICTED: dermatan-sulfate epimerase-like protein	Calidris pugnax	XP_014794182.1	198806	1215	67.491	283	89	1	1	280	721	1003	1.25e-125	395	83.75
PREDICTED: dermatan-sulfate epimerase-like protein	Pygoscelis adeliae	XP_009323223.1	9238	1216	67.254	284	89	1	1	280	721	1004	5.75e-127	399	84.15
PREDICTED: dermatan-sulfate epimerase-like protein	Melopsittacus undulatus	XP_005153508.1	13146	1216	67.254	284	89	1	1	280	721	1004	7.2e-128	401	84.15
PREDICTED: dermatan-sulfate epimerase-like protein	Opisthocomus hoazin	XP_009942913.1	30419	1216	67.254	284	89	1	1	280	721	1004	1.57e-127	400	84.51
PREDICTED: dermatan-sulfate epimerase-like protein	Pterocles gutturalis	XP_010079225.1	240206	1216	67.254	284	89	1	1	280	721	1004	2.02e-126	397	84.15
PREDICTED: dermatan-sulfate epimerase-like protein	Antrostomus carolinensis	XP_010162935.1	279965	1216	67.254	284	89	1	1	280	721	1004	5.73e-129	404	85.21
dermatan-sulfate epimerase-like protein	Limosa lapponica baueri	PKU44171.1	1758121	1216	67.254	284	89	1	1	280	721	1004	1.62e-126	397	83.45
dermatan-sulfate epimerase-like protein	Falco cherrug	XP_005432050.1	345164	1216	67.254	284	89	1	1	280	731	1014	1.88e-132	394	83.45
PREDICTED: dermatan-sulfate epimerase-like protein	Aptenodytes forsteri	XP_009286819.1	9233	1216	66.901	284	90	1	1	280	721	1004	1.41e-124	392	84.15
PREDICTED: dermatan-sulfate epimerase-like protein	Ornithorhynchus anatinus	XP_016081386.1	9258	1216	66.901	284	90	1	1	280	721	1004	1.56e-116	371	76.41
dermatan-sulfate epimerase-like protein	Amazona aestiva	KQK79276.1	12930	1216	66.901	284	90	1	1	280	721	1004	9.17e-128	401	84.51
PREDICTED: dermatan-sulfate epimerase-like protein	Geospiza fortis	XP_005423384.1	48883	1216	66.901	284	90	1	1	280	721	1004	5.66e-126	396	84.15
PREDICTED: dermatan-sulfate epimerase-like protein	Tyto alba	XP_009967542.1	56313	1216	66.901	284	90	1	1	280	721	1004	2.24e-123	389	83.8
PREDICTED: dermatan-sulfate epimerase-like protein	Falco peregrinus	XP_005239368.1	8954	1216	66.549	284	91	1	1	280	721	1004	9.19e-125	393	83.1
PREDICTED: dermatan-sulfate epimerase-like protein	Gavia stellata	XP_009818506.1	37040	1216	66.549	284	91	1	1	280	721	1004	2.14e-127	400	84.86
PREDICTED: dermatan-sulfate epimerase-like protein	Zonotrichia albicollis	XP_005482940.1	44394	1216	66.549	284	91	1	1	280	721	1004	4.6e-125	394	83.8
PREDICTED: dermatan-sulfate epimerase-like protein	Charadrius vociferus	XP_009887383.1	50402	1226	66.549	284	91	1	1	280	721	1004	2.04e-127	400	85.21
PREDICTED: dermatan-sulfate epimerase-like protein	Cariama cristata	XP_009696986.1	54380	1216	66.549	284	91	1	1	280	721	1004	2.82e-123	389	83.45
PREDICTED: dermatan-sulfate epimerase-like protein	Apaloderma vittatum	XP_009873019.1	57397	1216	66.549	284	91	1	1	280	721	1004	1.69e-126	397	83.45
PREDICTED: dermatan-sulfate epimerase-like protein	Merops nubicus	XP_008945106.1	57421	1216	66.549	284	91	1	1	280	721	1004	8.78e-126	395	83.1
PREDICTED: dermatan-sulfate epimerase-like protein	Picoides pubescens	XP_009908201.1	118200	1216	66.549	284	91	1	1	280	721	1004	1.19e-126	398	84.15
PREDICTED: dermatan-sulfate epimerase-like protein	Nestor notabilis	XP_010012414.1	176057	1216	66.549	284	91	1	1	280	721	1004	6.35e-126	396	83.1
dermatan-sulfate epimerase-like protein	Pogona vitticeps	XP_020669004.1	103695	1220	66.429	280	94	0	1	280	721	1000	2.54e-125	394	81.43
dermatan-sulfate epimerase-like protein	Anas platyrhynchos	XP_005024675.1	8839	1217	66.197	284	92	1	1	280	722	1005	1.64e-125	395	83.45
PREDICTED: dermatan-sulfate epimerase-like protein	Parus major	XP_015475360.1	9157	1216	66.197	284	92	1	1	280	721	1004	1.28e-124	392	84.15
PREDICTED: dermatan-sulfate epimerase-like protein	Phalacrocorax carbo	XP_009513756.1	9209	1216	66.197	284	92	1	1	280	721	1004	7.07e-125	393	82.39
Dermatan-sulfate epimerase-like, partial	Phoenicopterus ruber ruber	KFQ85538.1	9218	1218	66.197	284	92	1	1	280	723	1006	4.33e-125	394	84.15
PREDICTED: dermatan-sulfate epimerase-like protein	Eurypyga helias	XP_010152305.1	54383	1216	66.197	284	92	1	1	280	721	1004	6.28e-126	396	83.45
PREDICTED: dermatan-sulfate epimerase-like protein	Phaethon lepturus	XP_010288239.1	97097	1216	66.197	284	92	1	1	280	721	1004	6.28e-126	396	83.8
PREDICTED: dermatan-sulfate epimerase-like protein	Tauraco erythrolophus	XP_009981602.1	121530	1216	66.197	284	92	1	1	280	721	1004	9.75e-126	395	83.45
PREDICTED: dermatan-sulfate epimerase-like protein	Nipponia nippon	XP_009469582.1	128390	1216	66.197	284	92	1	1	280	721	1004	2.4e-125	394	84.51
PREDICTED: dermatan-sulfate epimerase-like protein	Buceros rhinoceros silvestris	XP_010142230.1	175836	1216	66.197	284	92	1	1	280	721	1004	4.51e-124	391	83.8
PREDICTED: dermatan-sulfate epimerase-like protein	Pseudopodoces humilis	XP_014112722.1	181119	1216	66.197	284	92	1	1	280	721	1004	4.1e-125	394	84.51
PREDICTED: dermatan-sulfate epimerase-like protein	Leptosomus discolor	XP_009944304.1	188344	1216	66.197	284	92	1	1	280	721	1004	4.59e-126	396	84.15
dermatan-sulfate epimerase-like protein	Lonchura striata domestica	XP_021386561.1	299123	1216	66.197	284	92	1	1	280	721	1004	2.73e-124	392	84.51
PREDICTED: dermatan-sulfate epimerase-like protein	Anser cygnoides domesticus	XP_013034949.1	381198	1216	66.197	284	92	1	1	280	721	1004	6.69e-126	396	84.51
dermatan-sulfate epimerase-like protein	Corvus cornix cornix	XP_010394570.3	932674	1216	66.197	284	90	2	1	280	731	1012	3.73e-131	391	83.45
PREDICTED: dermatan-sulfate epimerase-like protein	Chaetura pelagica	XP_009993929.1	8897	1216	65.845	284	93	1	1	280	721	1004	9.22e-127	398	84.86
PREDICTED: LOW QUALITY PROTEIN: dermatan-sulfate epimerase-like protein	Meleagris gallopavo	XP_003204980.2	9103	1216	65.845	284	93	1	1	280	721	1004	6.44e-124	390	82.75
PREDICTED: dermatan-sulfate epimerase-like protein	Serinus canaria	XP_009099982.1	9135	1216	65.845	284	93	1	1	280	721	1004	4.37e-125	394	84.51
PREDICTED: dermatan-sulfate epimerase-like protein	Sturnus vulgaris	XP_014726382.1	9172	1216	65.845	284	93	1	1	280	721	1004	7.61e-125	393	84.15
PREDICTED: dermatan-sulfate epimerase-like protein	Pelecanus crispus	XP_009483855.1	36300	1216	65.845	284	93	1	1	280	721	1004	7.69e-125	393	83.8
PREDICTED: dermatan-sulfate epimerase-like protein	Balearica regulorum gibbericeps	XP_010311485.1	100784	1216	65.845	284	93	1	1	280	721	1004	3.82e-124	391	84.51
dermatan-sulfate epimerase-like protein	Cyanistes caeruleus	XP_023777149.1	156563	1216	65.845	284	93	1	1	280	721	1004	1.38e-124	392	84.51
PREDICTED: dermatan-sulfate epimerase-like protein	Egretta garzetta	XP_009639790.1	188379	1216	65.845	284	93	1	1	280	721	1004	1.23e-124	392	83.45
dermatan-sulfate epimerase-like protein	Columba livia	XP_005498768.1	8932	1216	65.493	284	94	1	1	280	721	1004	4.46e-125	394	84.15
dermatan-sulfate epimerase-like protein	Numida meleagris	XP_021243445.1	8996	1216	65.493	284	94	1	1	280	721	1004	4.86e-123	388	81.69
PREDICTED: dermatan-sulfate epimerase-like protein	Calypte anna	XP_008503724.1	9244	1216	65.493	284	94	1	1	280	721	1004	3.44e-123	389	82.75
PREDICTED: dermatan-sulfate epimerase-like protein	Cuculus canorus	XP_009553531.1	55661	1216	65.493	284	94	1	1	280	721	1004	1.37e-121	384	83.45
PREDICTED: dermatan-sulfate epimerase-like protein	Coturnix japonica	XP_015710691.1	93934	1216	65.493	284	94	1	1	280	721	1004	3.7e-123	389	81.69
PREDICTED: dermatan-sulfate epimerase-like protein	Chlamydotis macqueenii	XP_010119616.1	187382	1216	65.493	284	94	1	1	280	721	1004	1.1e-123	390	83.1
dermatan-sulfate epimerase-like protein	Patagioenas fasciata monilis	OPJ68508.1	372326	1216	65.493	284	94	1	1	280	721	1004	6.71e-125	393	83.8
hypothetical protein ASZ78_001287	Callipepla squamata	OXB67997.1	9009	1202	65.141	284	95	1	1	280	707	990	5.46e-123	388	82.39
PREDICTED: dermatan-sulfate epimerase-like protein	Acanthisitta chloris	XP_009068657.1	57068	1216	65.141	284	95	1	1	280	721	1004	1.8e-124	392	84.86
PREDICTED: dermatan-sulfate epimerase-like protein	Corvus brachyrhynchos	XP_017584973.1	85066	1214	65.141	284	93	2	1	280	721	1002	7.53e-123	388	82.75
PREDICTED: dermatan-sulfate epimerase-like protein	Lepidothrix coronata	XP_017675067.1	321398	1216	65.141	284	95	1	1	280	721	1004	2.33e-123	389	84.51
PREDICTED: dermatan-sulfate epimerase-like protein	Gekko japonicus	XP_015264283.1	146911	1220	65.125	281	97	1	1	280	721	1001	4.45e-121	383	80.78
dermatan-sulfate epimerase-like protein	Gallus gallus	XP_004935280.1	9031	1216	65.018	283	95	1	1	279	721	1003	2.01e-121	384	81.63
PREDICTED: dermatan-sulfate epimerase-like protein	Mesitornis unicolor	XP_010179603.1	54374	1216	64.789	284	96	1	1	280	721	1004	8.45e-125	393	83.8
PREDICTED: dermatan-sulfate epimerase-like protein	Manacus vitellinus	XP_017937496.1	328815	1216	64.789	284	96	1	1	280	721	1004	2.76e-123	389	84.86
hypothetical protein H355_009678	Colinus virginianus	OXB70848.1	9014	1202	64.437	284	97	1	1	280	707	990	9.41e-122	385	82.04
PREDICTED: dermatan-sulfate epimerase-like protein	Colius striatus	XP_010195799.1	57412	1216	64.437	284	97	1	1	280	721	1004	3.72e-121	383	82.39
hypothetical protein CIB84_012955	Bambusicola thoracicus	POI23297.1	9083	1201	64.311	283	97	1	1	279	706	988	6.55e-121	382	81.27
PREDICTED: dermatan-sulfate epimerase-like protein	Ficedula albicollis	XP_005041824.1	59894	1216	64.085	284	98	1	1	280	721	1004	2.5e-121	384	83.8
dermatan-sulfate epimerase-like protein	Python bivittatus	XP_007427280.1	176946	1218	62.857	280	103	1	1	280	721	999	6.19e-113	361	79.64
PREDICTED: dermatan-sulfate epimerase-like protein	Thamnophis sirtalis	XP_013913700.1	35019	1218	62.5	280	104	1	1	280	721	999	2.9e-115	368	80.36
PREDICTED: dermatan-sulfate epimerase-like protein	Protobothrops mucrosquamatus	XP_015682241.1	103944	1218	62.143	280	105	1	1	280	721	999	2.63e-120	381	79.64
PREDICTED: dermatan-sulfate epimerase-like protein	Xenopus tropicalis	XP_002939660.1	8364	1205	61.786	280	104	1	1	280	718	994	1.21e-109	352	78.93
PREDICTED: dermatan-sulfate epimerase-like protein	Xenopus laevis	XP_018079105.1	8355	1206	60.714	280	107	1	1	280	719	995	2.66e-106	343	77.86
PREDICTED: dermatan-sulfate epimerase-like protein	Nanorana parkeri	XP_018428597.1	125878	1206	55.674	282	118	4	1	280	719	995	3.3e-102	332	75.89
PREDICTED: dermatan-sulfate epimerase-like protein	Latimeria chalumnae	XP_006008018.1	7897	1213	53.381	281	129	1	1	279	721	1001	4.73e-92	305	69.04
dermatan-sulfate epimerase-like protein	Oncorhynchus mykiss	XP_021418516.1	8022	1219	51.59	283	133	3	1	279	723	1005	5.89e-88	294	68.55
LOW QUALITY PROTEIN: dermatan-sulfate epimerase-like protein	Salvelinus alpinus	XP_023828162.1	8036	1219	51.59	283	133	3	1	279	723	1005	5.47e-89	297	68.9
PREDICTED: dermatan-sulfate epimerase-like protein	Lepisosteus oculatus	XP_006634565.1	7918	1216	51.418	282	134	2	1	279	722	1003	7.79e-87	291	71.28
PREDICTED: LOW QUALITY PROTEIN: dermatan-sulfate epimerase-like protein	Lates calcarifer	XP_018556305.1	8187	1218	51.418	282	134	2	1	279	727	1008	5.46e-84	283	68.79
dermatan-sulfate epimerase-like protein	Oncorhynchus kisutch	XP_020349681.1	8019	1219	51.237	283	134	3	1	279	723	1005	7.14e-88	294	68.2
dermatan-sulfate epimerase-like protein	Seriola dumerili	XP_022604538.1	41447	1219	51.237	283	134	3	1	279	727	1009	5.67e-82	277	68.55
dermatan-sulfate epimerase-like protein	Seriola lalandi dorsalis	XP_023287270.1	1841481	1219	51.237	283	134	3	1	279	727	1009	4.24e-82	278	68.55
PREDICTED: dermatan-sulfate epimerase-like protein	Notothenia coriiceps	XP_010786768.1	8208	1218	51.064	282	135	2	1	279	727	1008	8.9e-83	280	69.5
PREDICTED: dermatan-sulfate epimerase-like protein	Salmo salar	XP_014036408.1	8030	1219	50.883	283	135	3	1	279	723	1005	6.93e-87	291	67.84
dermatan-sulfate epimerase-like protein	Oncorhynchus tshawytscha	XP_024269110.1	74940	1219	50.883	283	135	3	1	279	723	1005	1.67e-87	293	68.2
PREDICTED: dermatan-sulfate epimerase-like protein	Paralichthys olivaceus	XP_019943448.1	8255	1218	50.709	282	136	2	1	279	727	1008	2.21e-83	281	69.15
dermatan-sulfate epimerase-like protein	Acanthochromis polyacanthus	XP_022049491.1	80966	1218	50.709	282	136	2	1	279	727	1008	2.78e-84	284	69.86
PREDICTED: dermatan-sulfate epimerase-like protein	Stegastes partitus	XP_008279155.1	144197	1218	50.709	282	136	2	1	279	727	1008	9.49e-84	282	69.86
PREDICTED: dermatan-sulfate epimerase-like protein	Larimichthys crocea	XP_010750322.2	215358	1218	50.709	282	136	2	1	279	727	1008	3.61e-84	283	69.5
PREDICTED: dermatan-sulfate epimerase-like protein	Pygocentrus nattereri	XP_017538970.1	42514	1214	50.355	282	137	2	1	279	723	1004	7.36e-87	291	68.79
putative dermatan-sulfate epimerase-like protein	Scophthalmus maximus	AWP17056.1	52904	1082	50.355	282	137	2	1	279	625	906	1.96e-85	285	66.67
dermatan-sulfate epimerase-like protein	Labrus bergylta	XP_020489336.1	56723	1215	50.355	282	137	2	1	279	727	1008	1.18e-82	279	69.15
PREDICTED: dermatan-sulfate epimerase-like protein	Scleropages formosus	XP_018620885.1	113540	1208	50.355	282	135	3	1	279	719	998	1.49e-84	285	68.09
LOW QUALITY PROTEIN: dermatan-sulfate epimerase-like protein	Boleophthalmus pectinirostris	XP_020786397.1	150288	1235	50.355	282	137	2	1	279	714	995	1.2e-83	282	67.02
dermatan-sulfate epimerase-like protein	Amphiprion ocellaris	XP_023150240.1	80972	1218	50.175	285	133	3	1	279	727	1008	5.35e-84	283	69.12
Dermatan-sulfate epimerase-like protein	Dicentrarchus labrax	CBN82124.1	13489	894	50	282	138	2	1	279	403	684	5.79e-84	279	69.15
PREDICTED: dermatan-sulfate epimerase-like protein isoform X1	Oreochromis niloticus	I3KXB6	8128	1218	49.823	283	139	2	1	280	729	1011	2.04e-92	286	71.38
dermatan-sulfate epimerase-like protein	Fundulus heteroclitus	XP_012713477.1	8078	1208	49.645	282	139	2	1	279	717	998	3.19e-82	278	69.15
dermatan-sulfate epimerase-like protein	Monopterus albus	XP_020473165.1	43700	1194	49.645	282	139	2	1	279	707	988	6.07e-81	275	69.15
dermatan-sulfate epimerase-like protein	Cynoglossus semilaevis	XP_008306394.1	244447	1215	49.645	282	139	2	1	279	724	1005	1.1e-80	274	67.38
dermatan-sulfate epimerase-like protein	Astyanax mexicanus	XP_007259036.2	7994	1215	49.117	283	140	3	1	279	723	1005	3.83e-84	283	68.9
PREDICTED: dermatan-sulfate epimerase-like protein	Esox lucius	XP_010897186.1	8010	1215	49.117	283	140	3	1	279	723	1005	2.49e-79	270	68.2
dermatan-sulfate epimerase-like protein	Oryzias latipes	XP_004081375.1	8090	1210	48.936	282	141	2	1	279	719	1000	1.48e-79	271	68.09
dermatan-sulfate epimerase-like protein	Oryzias melastigma	XP_024136182.1	30732	1204	48.936	282	141	2	1	279	713	994	7.24e-80	271	67.73
dermatan-sulfate epimerase-like protein	Kryptolebias marmoratus	XP_017262276.1	37003	1209	48.763	283	141	3	1	279	717	999	1.9e-81	276	70.67
PREDICTED: dermatan-sulfate epimerase-like protein	Poecilia reticulata	XP_008394790.1	8081	1204	48.582	282	142	2	1	279	713	994	5.45e-82	277	69.5
dermatan-sulfate epimerase-like protein	Xiphophorus maculatus	XP_005814529.1	8083	1204	48.582	282	142	2	1	279	713	994	4.62e-80	272	69.15
PREDICTED: dermatan-sulfate epimerase-like protein	Haplochromis burtoni	XP_005922643.1	8153	1218	48.582	282	142	2	1	279	727	1008	2.5e-82	278	70.21
PREDICTED: dermatan-sulfate epimerase-like protein	Cyprinodon variegatus	XP_015231261.1	28743	1204	48.582	282	142	2	1	279	713	994	2.77e-79	270	68.09
PREDICTED: dermatan-sulfate epimerase-like protein-like	Neolamprologus brichardi	XP_006795034.1	32507	1218	48.582	282	142	2	1	279	727	1008	4.56e-82	278	70.21
PREDICTED: dermatan-sulfate epimerase-like protein	Poecilia formosa	XP_007566014.1	48698	1204	48.582	282	142	2	1	279	713	994	8.91e-82	277	69.15
dermatan-sulfate epimerase-like protein	Maylandia zebra	XP_004551987.1	106582	1218	48.582	282	142	2	1	279	727	1008	2.6e-82	278	70.21
PREDICTED: dermatan-sulfate epimerase-like protein	Pundamilia nyererei	XP_005738964.1	303518	1218	48.582	282	142	2	1	279	727	1008	2.71e-82	278	70.21
PREDICTED: dermatan-sulfate epimerase-like protein	Austrofundulus limnaeus	XP_013860893.1	52670	1209	48.41	283	142	3	1	279	717	999	3.88e-79	270	67.49
LOW QUALITY PROTEIN: dermatan-sulfate epimerase-like protein	Rhincodon typus	XP_020374017.1	259920	875	48.387	279	134	5	6	279	389	662	2.94e-67	234	62.01
PREDICTED: dermatan-sulfate epimerase-like protein	Takifugu rubripes	XP_003968169.2	31033	1214	48.227	282	143	1	1	279	723	1004	5.73e-78	266	67.02
PREDICTED: dermatan-sulfate epimerase-like protein	Poecilia latipinna	XP_014887747.1	48699	1204	48.227	282	143	2	1	279	713	994	4.17e-81	275	68.79
PREDICTED: dermatan-sulfate epimerase-like protein	Poecilia mexicana	XP_014834995.1	48701	1204	48.227	282	143	2	1	279	713	994	6.68e-81	274	69.15
PREDICTED: dermatan-sulfate epimerase-like protein isoform X1	Sinocyclocheilus grahami	XP_016102000.1	75366	1213	48.227	282	141	3	1	279	723	1002	3.12e-81	275	70.57
PREDICTED: dermatan-sulfate epimerase-like protein	Sinocyclocheilus rhinocerous	XP_016430090.1	307959	1213	47.872	282	142	3	1	279	723	1002	3.66e-85	286	70.57
PREDICTED: dermatan-sulfate epimerase-like protein	Sinocyclocheilus anshuiensis	XP_016298772.1	1608454	1213	47.872	282	142	3	1	279	723	1002	1.55e-85	287	70.57
dermatan-sulfate epimerase-like protein	Paramormyrops kingsleyae	XP_023655946.1	1676925	1209	47.872	282	142	3	1	279	719	998	3.91e-76	261	64.18
PREDICTED: dermatan-sulfate epimerase-like protein	Cyprinus carpio	XP_018942770.1	7962	1213	47.518	282	143	3	1	279	723	1002	2.89e-79	270	69.86
PREDICTED: dermatan-sulfate epimerase-like protein	Nothobranchius furzeri	XP_015810267.1	105023	1211	45.936	283	149	3	1	279	722	1004	7.84e-75	258	66.78
PREDICTED: dermatan-sulfate epimerase-like protein	Hippocampus comes	XP_019730779.1	109280	1202	45.23	283	148	3	1	279	713	992	4.75e-74	255	62.54
PREDICTED: dermatan-sulfate epimerase-like protein	Callorhinchus milii	XP_007895427.1	7868	1238	44.681	282	148	6	6	279	744	1025	1.03e-59	215	61.35
hypothetical protein CCH79_00004031	Gambusia affinis	PWA18233.1	33528	1142	42.927	205	96	3	78	279	651	837	8.39e-39	154	62.44
PREDICTED: LOW QUALITY PROTEIN: dermatan-sulfate epimerase-like protein-like	Saccoglossus kowalevskii	XP_006820407.1	10224	966	40.741	108	49	2	115	209	589	694	2.56e-16	89.4	63.89
dermatan-sulfate epimerase-like protein	Danio rerio	XP_696502.2	7955	1191	40.636	283	151	6	1	280	707	975	4.72e-57	207	59.36
PREDICTED: dermatan-sulfate epimerase-like protein	Clupea harengus	XP_012683261.1	7950	1178	40.283	283	161	6	1	280	683	960	3.05e-51	191	56.89
PREDICTED: dermatan-sulfate epimerase-like protein	Ictalurus punctatus	XP_017351124.1	7998	1211	37.979	287	163	5	1	280	721	999	4.5e-55	201	58.19
PREDICTED: dermatan-sulfate epimerase-like protein	Branchiostoma belcheri	XP_019628749.1	7741	1049	36.047	258	155	5	7	263	637	885	2.08e-37	150	49.22
unnamed protein product, partial	Tetraodon nigroviridis	CAG05500.1	99883	1206	35.816	282	176	3	1	279	719	998	5.04e-45	172	53.9
dermatan-sulfate epimerase-like protein	Acanthaster planci	XP_022082422.1	133434	1196	30.729	192	117	6	5	191	715	895	1.79e-15	87	53.12
N/A	Pocillopora damicornis	XP_027037667.1	46731	1137	28.767	219	119	12	1	201	709	908	8.23e-08	42.4	40.64
N/A	Acropora digitifera	XP_015780698.1	70779	1122	28.302	212	126	8	1	201	705	901	2.64e-13	59.3	43.87
PREDICTED: dermatan-sulfate epimerase-like protein	Strongylocentrotus purpuratus	XP_787972.3	7668	1194	28.125	288	179	11	7	279	702	976	2.54e-15	86.7	46.88
N/A	Orbicella faveolata	XP_020609604.1	48498	1136	28.07	228	122	8	1	207	704	910	1.57e-12	57	42.98
dermatan-sulfate epimerase-like protein	Stylophora pistillata	XP_022779493.1	50429	1136	27.907	215	134	6	6	211	705	907	0.024	47.4	39.07
hypothetical protein BSL78_01104, partial	Apostichopus japonicus	PIK61961.1	307972	909	27.528	178	117	5	3	174	736	907	1.52e-05	57.4	45.51	OST domain partly missing in automated annotation, but found after manual analysis
Uncharacterized protein	Ciona savignyi	H2ZMX0	51511	1071	26.068	234	141	9	1	228	668	875	3.32e-15	64.3	43.16
N/A	Dendronephthya gigantea	XP_028410035.1	151771	1106	25.373	134	92	3	48	181	739	864	9.61e-08	42.4	46.27
dermatan-sulfate epimerase-like protein	Exaiptasia pallida	XP_020893257.1	1720309	1168	24.153	236	139	9	7	209	710	938	0.1	45.4	41.1
PREDICTED: dermatan-sulfate epimerase-like protein	Ciona intestinalis	XP_002130087.1	7719	1182	24.088	274	155	11	7	238	720	982	0.000251	53.5	37.96

## Sheet: QUERY
>aa731-1010
LGFGGFASVADQGQITRFGLGTQAIVKPVRHDRIIFPFGFKFNIAVGLILCISLVILTFQWRFYLSFRKLMRWILILVIALWFIELLDVWSTCSQPICAKWTRTEAEGSKKSLSSEGHHMDLPDVVITSLPGSGAEILKQLFFNSSDFLYIRVPTAYIDIPETELEIDSFVDACEWKVSDIRSGHFRLLRGWLQSLVQDTKLHLQNIHLHEPNRGKLAQYFAMNKDKKRKFKRRESLPEQRSQMKGAFDRDAEYIRALRRHLVYYPSARPVLSLSSGSWT

## Sheet: FASTA
>99883
MVASWAVSCAFFLPLFAAGAAFSGVFNASDRDIFTDDLLQVKVPQDRAGRQRQLQSAASHPKLYFSPEDL
VHLRQRSSTTHSHIFKVVRVAVLTMLSNVPFYMPPAKHEDFTSKWNEIYGNNLPPLALYCLLCPEDSAAL
QFLLRFMDRMAEYPDWKVTSAPNDEVPMAHSLTGFATAYDFVYSYLDEQRRNLYLKKIRSETEELYELSK
HRGWGKQYLQNHQTTNILAVLTGAIVVGSPDDPESMMWKQVAVNYMEKTMFLLNHVVDGSLDEGVAYGSY
TAKSITQYVFLAQRHFDIDNLQNNWLRGHFWFYYATLLPGFQRSVGIADSNYNWFYGPESQLVFLDSFVM
RNGTGNWLAQQIRKHRPKDGPMGQSSAQRWATLHTEYIWYNHHLTPQPPQDFGKARMHIFSNWGVVTYGA
GLPSGQGNTFLSFKSGKLGGRAVYDMVHDKPYSWLEGWNSFNPGHEHPDQNSFTFAPNGQVFVSEALYGP
KYSYLNNVLVFSPSPTSQCNSPWEGQLGECAKWLRWTDDGVGDARGEVVAASLHGDTMFVSGEAALAYSP
AMRLKSVFRALVLLNSQMLLVLDHVEKSGDSPLTSLSAFFHNLDIDFKYVPFKFADRYNGAMMDVWDAHY
KMFWFDSQGQSPNTRIQEAEQAAEFKKRWTQYVNVTFGMTGATSRVAYVLHGPYVKVSNARFVDSSKNGV
RISLTINNTEKIVSIATNYKDIGARLSYLGFGGHCKVEDAYQVTRFGLGTQNIPKQISRDNQLFDLSFTV
NVVAGVVLCVAIGFLTMQRKFYVCFSRLMRYVLLTVLVLWIAELLFVSNSCDRLLCGVNWNGARSEANQQ
LRSTSSSGSLCPPSSSPASQGLGQRYSSICLTTAQTSFTSEFPPSTSTSPKPSLSSTLWLMHASGPGRTT
AQGRFKIIQGWLHSLVHNIKLHLQNIQLAEGSRVKQAQRGGALRDRRKRSRRREAASEPKGKFRVALDKD
AEYIREMRHHVAEYPNARVVLSMRSGSWALKLPFIQEAVGLSLRTIYLVRDPRAWIYLMVYNSKPSLYAL
KNIPQHLSLIFKEGALSEGCPAVAPEFKTIQRLVSASTTNPVLILAHLWLAHTAAVLRLSEGLPEEAYLR
VRFEDVVNYPQETAEGIHAFLGVPVSPAALNQLTFTTSTNLYNLLYEGEISPANINAWRQKMPRKDIRLV
EDVCGGVMKRLGYARF
>9598
MPKGGAPPWIMALMFTGHLLFLALLMFAFSTFEESVSNYSEWAVFTDDIDQFKTQKVQDFRPNQKLKKSM
LHPSLYFDAGEIQAMRQKSRTSHLHLFRAIRSAVTVMLSNPTYYLPPPKHADFAAKWNEIYGNNLPPLAL
YCLLCPEDKVAFEFVLEYMDRMVGYKDWLVENAPGDEVPIGHSLTGFATAFDFLYNLLDNHRRQKYLEKI
WVITEEMYEYSKVRSWGKQLLHNHQATNMIALLTGALVTGVDKGSKANIWKQAVVDVMEKTMFLLNHIVD
GSLDEGVAYGSYTAKSVTQYVFLAQRHFNINNLDNNWLKMHFWFYYATLLPGFQRTVGIADSNYNWFYGP
ESQLVFLDKFILKNGAGNWLAQQIRKHRPKDGPMVPSTAQRWSTLHTEYIWYDPQLTPQPPADYGTAKIH
TFPNWGVVTYGAGLPNTQTNTFVSFKSGKLGGRAVYDIVHFQPYSWIDGWRSFNPGHEHPDQNSFTFAPN
GQVFVSEALYGPKLSHLNNVLVFAPSPSSQCNKPWEGQLGECAQWLKWTGEEVGDAAGEIITASQHGEMV
FVSGEAVSAYSSAMRLKSVYRALLLLNSQTLLVVDHIERQEDSPINSVSAFFHNLDIDFKYIPYKFMNRY
NGAMMDVWDAHYKMFWFDHHGNSPMASIQEAEQAAEFKKRWTQFVNVTFQMESTITRIAYVFYGPYINVS
SCRFIDSSNPGLQISLNVNNTEHVVSIVTDYHNLKTRFNYLGFGGFASVADQGQITRFGLGTQAIVKPVR
HDRIIFPFGFKFNIAVGLILCISLVILTFQWRFYLSFRKLMRWILILVIALWFIELLDVWSTCSQPICAK
WTRTEAEGSKKSLSSEGHHMDLPDVVITSLPGSGAEILKQLFFNSSDFLYIRVPTAYIDIPETELEIDSF
VDACEWKVSDIRSGHFRLLRGWLQSLVQDTKLHLQNIHLHEPNRGKLAQYFAMNKDKKRKFKRRESLPEQ
RSQMKGAFDRDAEYIRALRRHLVYYPSARPVLSLSSGSWTLKLHFFQEVLGASMRALYIVRDPRAWIYSM
LYNSKPSLYSLKNVPEHLAKLFKIEGGKGKCNLNSGYAFEYEPLRKELSKSKSNAVSLLSHLWLANTAAA
LRINTDLLPTSYQLVKFEDIVHFPQKTTERIFAFLGIPLSPASLNQILFATSTNLFYLPYEGEISPTNTN
VWKQNLPRDEIKLIENICWTLMDRLGYPKFMD
>10090
MAFMFTEHLLFLTLMMCSFSTCEESVSNYSEWAVFTDDIQWLKSQKIQDFKLNRRLHPNLYFDAGDIQTL
KQKSRTSHLHIFRAIKSAVTIMLSNPSYYLPPPKHAEFAAKWNEIYGNNLPPLALYCLLCPEDKVAFEFV
MEYMDRMVSYKDWLVENAPGDEVPVGHSLTGFATAFDFLYNLLGNQRKQKYLEKIWIVTEEMYEYSKIRS
WGKQLLHNHQATNMIALLIGALVTGVDKGSKANIWKQVVVDVMEKTMFLLKHIVDGSLDEGVAYGSYTSK
SVTQYVFLAQRHFNINNFDNNWLKMHFWFYYATLLPGYQRTVGIADSNYNWFYGPESQLVFLDKFILQNG
AGNWLAQQIRKHRPKDGPMVPSTAQRWSTLHTEYIWYDPTLTPQPPVDFGTAKMHTFPNWGVVTYGGGLP
NTQTNTFVSFKSGKLGGRAVYDIVHFQPYSWIDGWRSFNPGHEHPDQNSFTFAPNGQVFVSEALYGPKLS
HLNNVLVFAPSPSSQCNQPWEGQLGECAQWLKWTGEEVGDAAGEVITAAQHGDRMFVSGEAVSAYSSAMR
LKSVYRALLLLNSQTLLVVDHIERQETSPINSVSAFFHNLDIDFKYIPYKFMNRYNGAMMDVWDAHYKMF
WFDHHGNSPVANIQEAEQAAEFKKRWTQFVNVTFHMESTITRIAYVFYGPYVNVSSCRFIDSSSSGLQIS
LHVNSTEHSVSVVTDYQNLKSRFSYLGFGGFASVANQGQITRFGLGTQEIVNPVRHDKVNFPFGFKFNIA
VGFILCISLVILTFQWRFYLSFRKLMRCVLILVIALWFIELLDVWSTCTQPICAKWTRTEAKANEKVMIS
EGHHVDLPNVIITSLPGSGAEILKQLFFNSSDFLYIRIPTAYMDIPETEFEIDSFVDACEWKVSDIRSGH
FHLLRGWLQSLVQDTKLHLQNIHLHETSRSKLAQYFTTNKDKKRKLKRRESLQDQRSRIKGPFDRDAEYI
RALRRHLVYYPSARPVLSLSSGSWTLKLHFFQEVLGTSMRALYIVRDPRAWIYSVLYGSKPSLYSLKNVP
EHLAKLFKIEEGKSKCNSNSGYAFEYESLKKELEISQSNAISLLSHLWVANTAAALRINTDLLPTNYHLV
KFEDIVHFPQKTTERIFAFLGIPLSPASLNQMLFATSTNLFYLPYEGEISPSNTNIWKTNLPRDEIKLIE
NICWTLMDHLGYPKFMD
>7955
MENMQRSAFLLCVLAVGLAFCGISSASDRYVSLNEHQRDNATLSEHLHPKLYFDHTEVRLMKKRASTTHR
RIFQVIRNAVSIMLSNAAVYQPPLNHEDFGKKWNEIYGNNLPPLALYCLLQPEDAAASQFLIEYMDRMVE
YPDWMVSSAPNDEVPIAHSLTGFATAYDFIYPFLDTRRRLRYLKKIRSVTEELFELSKHRGWGKQFLQNH
QTTNILAILIGALVAGEHNDPETMIWKQISVNYMEKTMFLLSHIVDGSLDEGVAYGSYTAKSITQYVYLA
LRHFQIDNMQNNWLRAHFMFYFATLLPGFQRTVGIADSNYNWFYGPESQLVFLDAYVLRNGSGNWLAEQI
RKHRPKDGPMMQSAAQRWATLHTEYIWYNSELTPQPPSDFNKAAMHIFSNWGVVTYGAGLTRAQGNTFVS
FKSGKLGGRAVYDIVHAQPYSWVDGWMNFNPGHEHPDQNSFTFAPNGQVFVSEALYGPKYSYLNNVLVFA
PSPTSQCNEPWEGQLGECSKWLRWGEKEVGNTAGEVISAVSHQDMLFVSGESVSAYSSAMKLKSVYRSLV
LLNSQTLLVLDHIEKHEHSPLSSFSAFFHNLDIDFRYVPHRSFGKYNGALMDVWDAHYKMFWLDVQGSSP
VARIQEAEQAAEFKKRWTQFINVTFRMENPITRVAYLMHGPYVKVSDCRFIDNSKNGVKISVTLNDTETV
VSVVTNYADIEARQGYLGFAGFAKTEDNQRIVQFGRGIQTLASQVAKDFVFDFGFLVNISAILTLCFALA
FVIKKRKLHVSFNMLIHCTLVCVLFLWVTELLSVFYGCEQLLCNKPKDSSIYHASDSNIPDVLPVITITS
MPGSGAEILQHLFDNSSDFLYLRIPSAYLRLPVSPFSSLLDACEWSREDAQNGRFRVVQGWFHSIIHNVK
LHLQNIQLHQINDEAGDDVKVKRQRKRRMLLSERSKTEGGKGVTIDMVYIQELRQHLVKYPNARPELSLG
TGGWFLKLPYLQEVIGHSLRSLHVVRDPRAWIYLMLYNSKPSLYLRKNIKRHITTLFKQNTDGVDQGCAT
LDSQFHPLKMILSQPDPNPVQLLAQLWLAHNSAGLKVSSGLPTQTYLIVKFEDIVRFPEETARTIHNFLG
IPVAPAALNQLTYATSTNLYNLIYEGDISPAKVNMWKENMAADEIQLIEDTCWPVMERLGYKRHTVSHSF
L
>9606
MALMFTGHLLFLALLMFAFSTFEESVSNYSEWAVFTDDIDQFKTQKVQDFRPNQKLKKSMLHPSLYFDAG
EIQAMRQKSRASHLHLFRAIRSAVTVMLSNPTYYLPPPKHADFAAKWNEIYGNNLPPLALYCLLCPEDKV
AFEFVLEYMDRMVGYKDWLVENAPGDEVPIGHSLTGFATAFDFLYNLLDNHRRQKYLEKIWVITEEMYEY
SKVRSWGKQLLHNHQATNMIALLTGALVTGVDKGSKANIWKQAVVDVMEKTMFLLNHIVDGSLDEGVAYG
SYTAKSVTQYVFLAQRHFNINNLDNNWLKMHFWFYYATLLPGFQRTVGIADSNYNWFYGPESQLVFLDKF
ILKNGAGNWLAQQIRKHRPKDGPMVPSTAQRWSTLHTEYIWYDPQLTPQPPADYGTAKIHTFPNWGVVTY
GAGLPNTQTNTFVSFKSGKLGGRAVYDIVHFQPYSWIDGWRSFNPGHEHPDQNSFTFAPNGQVFVSEALY
GPKLSHLNNVLVFAPSPSSQCNKPWEGQLGECAQWLKWTGEEVGDAAGEIITASQHGEMVFVSGEAVSAY
SSAMRLKSVYRALLLLNSQTLLVVDHIERQEDSPINSVSAFFHNLDIDFKYIPYKFMNRYNGAMMDVWDA
HYKMFWFDHHGNSPMASIQEAEQAAEFKKRWTQFVNVTFQMEPTITRIAYVFYGPYINVSSCRFIDSSNP
GLQISLNVNNTEHVVSIVTDYHNLKTRFNYLGFGGFASVADQGQITRFGLGTQAIVKPVRHDRIIFPFGF
KFNIAVGLILCISLVILTFQWRFYLSFRKLMRWILILVIALWFIELLDVWSTCSQPICAKWTRTEAEGSK
KSLSSEGHHMDLPDVVITSLPGSGAEILKQLFFNSSDFLYIRVPTAYIDIPETELEIDSFVDACEWKVSD
IRSGHFRLLRGWLQSLVQDTKLHLQNIHLHEPNRGKLAQYFAMNKDKKRKFKRRESLPEQRSQMKGAFDR
DAEYIRALRRHLVYYPSARPVLSLSSGSWTLKLHFFQEVLGASMRALYIVRDPRAWIYSMLYNSKPSLYS
LKNVPEHLAKLFKIEGGKGKCNLNSGYAFEYEPLRKELSKSKSNAVSLLSHLWLANTAAALRINTDLLPT
SYQLVKFEDIVHFPQKTTERIFAFLGIPLSPASLNQILFATSTNLFYLPYEGEISPTNTNVWKQNLPRDE
IKLIENICWTLMDRLGYPKFMD
>7719
MVLTSGIKHSQLVSFVILTVVLVSQNGGLAARNVKRQKGYLSNDEKGKSTDDKHPMLYFNAMDIPRMRHK
ALNSHAKIAKIIQEAGRSLKEKPDYYLPPKSFESFGSRWNELYGNNLCAFAMYCVLHPDDTKALSLVKLY
MDRMTSYPDWYVTASRNIDEVPIGHSLTGYVTAYDFLYPVLEPKRRSIYLERIGNETALMYRVVQKGRAG
WTKQRIHNHAPTNVFALLIGAMVYEDFDPSSAKHWKGVAMSMFEKALSILEVVVDGTSDEGVAYGSYTSR
GLTQYIFMALRHFDTDHTQNSWLRQHFWFFFATTMPGFQRTVGIADSNHNWFYGPESQLVFLDAFVLRNG
NGNWLADRIRSAKPKNPPLARSMSQKWSTVHTEFIFYDASLKSNRPVLPSNSSYHIFSDWGVVTYGGGQY
MKKGNTFLSFKSGPIHGEAVSDIVENSWFPGLSPGWANFNPGHEHPDQNSFVFAPNGRYFITEALYAPKY
SDLNNIVTFSPSPDSKCNSPWEGQVGECGKWLDYKHQIPASRGKIATVTTSGDMIHIAGEAVDAYRPELG
LRSVQRSLLLLTSEVLLVLDTIVLYSDSQLKTASSLFHNILHTFHPYQHLDFNGAQVVYPEGAYAFFWLQ
QDGNSPTAKFVDHHYAADGKQSTHYVNITYPLNTDHATRVAYIFVGPNTKVHSVWFHEKSTDEIAYLSIV
INNTEYKISIASLLVSTARRNSLLGFGGYLTLSDGDHVTQFGFEDTKTKVDRCEAVDDEEKTEKLVHKLI
SSMYPNPGAVEEVVQIEKQESNPEKNPIYLFVVILNLVCFVCVVSLVCAVRKKTLVSASTKWFWKCLFLI
TVTWLFTLYHFMCHECPLIRKARQECPISDPAEFLYASTKQPMVVIASLPGFGAEFMEPMFANSSDFLYF
TTDDVPPEVSGDDSSRYDACYWPPNFQGHPGTAGWFASTHTEPLLFLNNLQDPNPHMKHLQKKFRQLNKS
PRFAINLLSGYWNTKLAWINNLIGHDMRTILVVRDPRDWIHSLIRDDLDYVQRKRQQKVLRNLLRTQSCV
APIMLPWEYVYMKKKGGKGGRASIVEKLALIWARNIAVMIRTSRSLQIVRLEDLEKHPDKVVVEVFKRMG
LTVSVPQINRVTRSVRTGYFPRLYEDAIKEDREQEWEDEMDEDEIELVENICSDVMKKLAYS
>8364
MALNYTEHYIFLFITILFFFFIDKSASNSSDWLLLTNNVAQYHKLYEFTSSAKQKSGLHPNLYFDATNVQ
ELRQKSHTSHIHLYRTIRNAVMKMLSNPSYYLPPPKHADFTAKWNEIYGNNLPPLALYCLLSPDDKTAFT
FVLEYMDRMANYKDWLVQTAPGDEVPLGHSLTGFATAYDFLYSSLDNDRRQRYIKKIQMASEEMYEYSKI
RSWGKQFLHNHQATNMLALLTGALVVQVYREAQANVWKQTVVDVMEKTMFLLNHVVDGSLDEGVAYGSYT
SKSITQYVFLAHRHFGINHFENTWLKMHFYFYYSTLLPGFQRTIGIGDSNYNWFYGPESQLVFLDTFILK
NGIGNWLAYQIRKHRPKDGPMVPSTAQRWSTLHTEYLWYNADLSLHPPPDHGTAKMHLFPNWGVVTYGAG
LPNTQTNTFFSFKSGKLGGRAVYDIVHFQPYSWVDGWRSFNPGHEHPDQNSFTFAPNGQVFVSEALYGPK
MSYLNNILVFAPSPTSQCNKPWEGQLGECSQWLKWTTEESGDVSGEIITANQHEEMVFVSGEAVSAYSSS
MRLKSVYRGLLLLNHQTLLVIDHIEKYQDSPISLASAFFHNLDIDFKYVAFKFLNKYNGAMMDIWDAHYK
MFWLDQNGNSPSARIQEAEQAAEFKKRWTQFVNVTFQLNDKISRIAYLFFGPYVNVSDLKFLDDSKFGVK
ISVKINNTENIVSLVTEYNDLEARFSFLGFGGFAKVENQEKIVRFGLGVDHIRKHEPVGLNIFHFGLKVN
VMIGLILCIGLVILAFNWRFYISFSKLMRWILVLIITLYFFELLDVWSTCTQPICAKWNSEIADSENKYE
RQSINLPAIIITSLPSSGAEILKQLFFNSSDFIYIRVPTAYIDIPDGEFKVDSFVDACEWSSSDVQEGHF
KLIQGWLQSLLQNTKIHLQNIDLHEPSKPKLFHHSIITKDKKRRFKRRDPFPEQKNRIKGSYDRDAEYIR
HLRKQLIKFPNAQPVLGLSSGSWTLKLPFIQNIIGPSLRAIFVVRDPRSWIYTLLYKSRPNLFSLRNIPQ
RLYEIFKEEEKQKCKSNAGYAFEYESLEDELFDSESNPLSKLSHLWLSNTAAARRINRNLPAINYLLVKF
EDIINSPQETAEQIYTFFGIPISPASLNQILFASSTNLFYLPQEGEISPSSLNTWKLNMPKEDIKLIENI
CLTQMQQLGYTKYID
>9646
MALMFTGHFLFLASVMFAFSTFEESVSNYSDWAVFTDDIDPFKTQKVQDFKPNQKPKKSMLHPSLYFDAG
EIQAMRQKSRTSHLHLFRAIRSAVTVMLSNPTYYLPPPKHADFAAKWNEIYGNNLPPLALYCLLCPEDKV
AFEFVLEYMDRMVGYKDWLVENAPGDEVPVGHSLTGFATAFDFLYNLLDDHRRQKYLEKIWAVTEEMYEY
SKVRSWGKQLLHNHQATNMIALLTGALVTGVDKGSKANIWKQVVVDVMEKTMFLLNHIVDGSLDEGVAYG
SYTAKSVTQYVFLAQRHFNINNLDNNWLKMHFWFYYATLLPGFQRTVGIADSNYNWFYGPESQLVFLDKF
ILKNGAGNWLAQQIRRHRPKDGPMVPSTAQRWSTLHTEFIWYDPQLTPQPPAEYGTAKMHTFPNWGVVTY
GAGLPYSQTNTFVSFKSGKLGGRAVYDIVHFQPYSWIDGWRSFNPGHEHPDQNSFTFAPNGQVFVSEALY
GPKLSYLNNVLVFAPSPTSQCNKPWEGQLGECAQWLKWTGEEAGDAAGEIITASQHGEMIFVSGEAVSAY
SSAMKLKSVYRALLLLNSQTLLVVDHVERQDNSPIKSVSAFFHNLDIDFKYIPYRFMNRYNGAMMDVWDA
HYRMFWFDHRGNSPTASIQEAEQAAEFKKRWTQFVNVTFQMESTITRIAYVFYGPYVNVSSCRFIDDSNS
GLQISLNVNNTEHVVSVVTDYHNLKTRFDYLGFGGFANVADQSQVTRFGLGTQAIAKPIRQDRVIFPFGF
KFNIAVGLILCISLVVLTFQWRFYLSFRKLMRWILILVIALWFIELLDVWSTCTQPLCAKWAKTEAEASP
KSLSSEGHHLDLPDVVITSLPGSGAEILKQLFFNSSDFLYIRVPTTYIDIPETEFEIGSFVDACEWKASD
IHSVHFRLLRGWLQSLVQDTKLHLQNIHLHEPSRGKLAQYFTANKDKKRKLKRRESLPEQKSRMKGTFDR
DAEYIRALRRHLVYYPSARPVLSLSSGSWTLKLHFFQEVLGASMRALYIVRDPRAWIYSMLYSSKPSLYS
LKNVPEHLAKLFKVEGGKGKCNLNSGYAVEYESLRKELSKSKSSAVSLLSHLWLANTAAALRINTDLLPT
SYQLIKFEDIVHFPQKTTERIFAFLGIPLSPASLNQILFATSTNLFYLPYEGEISPTNTNVWKQNLPRDE
IKLIENICWTLMERLGYPKFMD
>13489
MLPGFQRTVGIADSNYNWFYGPESQLVFLDTFVMRNGTGNWLAQQIRKHRPKDGPMGQSSAQRWATLHTE
YIWYNNHLTPQPPHDFGKARMHIFSNWGVVTYGAGLPNGQGNTFVSFKSGKLGGRAVYDIVHDKPYSWVE
GWNSFNPGHEHPDQNSFTFAPNGQVFVSEALYGPKYSYLNNVLVFSPSPTSQCNSPWEGQLGECAKWLRW
TDEGVGDARGEVIVASSHRDTMFVSGEAVSAYSPAMKLKSVFRALVLLNSQTLLVLDHVEKWADSPVKSL
SAFFHNLDIDFKYVPFRFMDKYNGAMMDVWDAHYKMFWFDSQGHSPDTRIQEAEQAAEFKKRWTQYVNVT
FPMTGTVSRVAYVLHGPYVKVSNCKFIDNSKNGVRLSLIINNTEKIVSIATNYKDIGARLTYLGFGGHCK
VEDRYQITRYGLGTQLIPKQISSDNQLFDFGFTVNVIAGVVLCVAIGFLTMQRKFYVCFSRLMRYALLSV
LILWIAELLFVSNSCDQLLCGVKWKGAGAKSEVNKQIRLYEQHRLPLPTVVITTLPGSGSEILKHLFYNN
SDFVYIRVPTEHVDIPETEFEFDSLVDACEWSRSDAMHGRFKIIQGWLHSLVHNTKLHLQNIQLVEGSRV
KQPQRAGPSRDRKKRSRRREPASELKGKLRASLDRDAEYVREMRRHVAEYPNARVVLNMRSGSWALKLPF
IQEVVGHSLRTLYLVRDPRAWIYLMVYNSKPSLYSLKNIPQHLSLIFKEDAVTDGCPTVAPEFKIIQRLL
SRSETNPILILAHLWLAHTAAVLRVSEGLPEDSYLQVRFEDVVNFPQETAESIHTFLGVPVSPSALNQLI
FTTSTNLYNLMYEGDISPANINMWRQNMPRKDIRLIEDVCGSVMKRLGYTRFAS
>9913
MALMFTGHCLFLVLVMFAFSTLEESVSNYSDWAVFPDDIDPFKTQRVQDVRPNQKPKKSMLHPRLYFDAG
EIQAMRQKSRTTHLHLFRAIRSAVTAMLSNPTYYLPPPKHADFAAKWNEIYGNNLPPLALYCLLCPEDKV
AFEFALEYMDRMVGYKDWLVENAPGDEVPVGHSLTGFATAFDFLYNLLDGRRRQKYLEKIWVITEEMYEY
SKVRSWGKQLLHNHQATNMIALLTGALVTGVDKGSKVNLWKQVVVDVMEKTMFLLNHIVDGSLDEGVAYG
SYTAKSVTQYVFLAQRHFNINNLDNNWLKMHFWFYYATLLPGFQRTVGIADSNYNWFYGPESQLVFLDKF
VLKNGAGNWLAQQIRRHRPKDGPMVPSTAQRWSTLHTEYIWYDPQLTPQPPAEYGTAKMHMFPNWGVVTY
GAGLPNTQTNTFVSFKSGKLGGRAVYDIVHFQPYSWIDGWRSFNPGHEHPDQNSFTFAPNGQVFVSEALY
GPKLSHLNNVLVFAPSPTSQCNKPWEGQLGECAQWLKWTGEEVGDAAGEIITASQHGDMIFVSGEAVSAY
SSAMKLKSVYRALLLLNSQTLLVVDHVEKQEDSPIKSVSAFFHNLDIDFKYIPYRFMNRYNGALMDVWDA
HYKMFWFDHRGSSPLASIQEAEQAAEFKKRWTQFVNVTFQMESAITRIAYVFYGPYVNVSSCRFIDNSNS
GLQLSLNVNNTDHVVSIVTDYQNLKTRFDYLGFGGFATVADQAQVTRFGLGTEAIVKPIRRDRVIFPFGF
KFNVAVGLILCIGLVILTFQWRFYLSFRKLMRWILILVIALWSVELLDVWSACTQPICAKWARPETEASG
QALAPGGQRTDPPDVVITSLPGSGAEILKQLFFNSSDFLYIRVPTAYIDIPETELEIDSFVDACEWTASE
VHGVRFRLLRGWLQSLVRDTKLHLQNIHLHEPSRGKLAQYFSMNKDKKRKLKRRESLAEQRSRMKGAFDR
DAEYVRALRRHLVHYPSARPVLSLGSGSWTLKLHFFNEVLGASMRALYVVRDPRAWVYSMLYSSKPSLYS
LKNVQEHLAKLFKTEGSAGRCTLNSGYAVEYELLRKELLASRPHPVSLLAHAWLANTAAALRLNADLLPT
SYQLIKFEDLVHFPQNTTERIFAFLGIPLSPATLNQILFATSTNLFYLPYEGEISPANTNVWKRNLPKDE
IKLIENICWTLMDRLGYPKFMD
>61853
MPKGGAPPWIMALMFTGHLLFLALLMFAFSTFEESVSNYSEWAVFTDDIDQFKTQKVQDFRPNQKLKKSM
LHPSLYFDAGEIQAMRQKSHTSHLHLFRAIRSAVTVMLSNPTYYLPPPKHADFAAKWNEIYGNNLPPLAL
YCLLCPEDKVAFEFVLEYMDRMVGYKDWLVENAPGDEVPIGHSLTGFATAFDFLCNLLDNNRRQKYLEKI
WVITEEMYEYSKVRSWGKQLLHNHQATNMIALLTGALVTGVDKGSKANIWKQAVVDVMEKTMFLLNHIVD
GSLDEGVAYGSYTAKSITQYVFLAQRHFNINNLDNNWLKMHFWFYYATLLPGFQRTVGIADSNYNWFYGP
ESQLVFLDKFILKNGAGNWLAQQIRKHRPKDGPMVPSTAQRWSTLHTEYIWYDPQLTPQPPADYGTAKIH
TFPNWGVVTYGAGLPNTQTNTFVSFKSGKLGGRAVYDIVHFQPYSWIDGWRSFNPGHEHPDQNSFTFAPN
GQVFVSEALYGPKLSHLNNVLVFAPSPSSQCNKPWEGQLGECAQWLKWTGEEVGDAAGEIITASQHGEMI
FVSGEAVSAYSSAMRLKSVYRALLLLNSQTLLVVDHIERQEDSPINSVSAFFHNLDIDFKYIPYKFMNRY
NGAMMDVWDAHYKMFWFDHHGNSPMASIQEAEQAAEFKKRWTQFVNVTFQMESTITRIAYVFYGPYINVS
SCRFIDSSNSGLQISLNVNNTEHVVSIVTDYHNLKTRFNYLGFGGFASVADQGQITRFGLGTQAIVKPVR
HDRIIFPFGFKFNIAVGLILCISLVILTFQWRFYLSFRKLMRWILILVIALWFIELLDVWSTCSQPICAK
WTRTEAEGSKKSLSSEGHHMDLPDVVITSLPGSGAEILKQLFFNSSDFLYIRVPTAYIDIPETELEIDSF
VDACEWKVSDIRSGHFRLLRGWLQSLVQDTKLHLQNIHLHEPNRGKLAQYFAMNKDKKRKFKRRESLPEQ
RSQMKGAFDRDAEYIRALRRHLVYYPSARPVLSLSSGSWTLKLHFFQEVLGASMRALYIVRDPRAWIYSM
LYNSKPSLYSLKNVPEHLAKLFKIERGKGKCNLNSGYAFEYEPLRKELSKSKSNAVSLLSHLWLANTAAA
LRINTDLLPTSYQLVKFEDIVHFPQKTTERIFAFLGIPLSPASLNQILFATSTNLFYLPYEGEISPTNTN
VWKQNLPRDEIKLIENICWTLMDRLGYPKFMD
>10141
MSLHQHNEKLNGQKNYNNQVEDDWITDTIWVVTEEMYEYSKVRSWGKQLLHNHQATNMIALLTGALVAGV
EKGSKANLWKQVVVDVMEKTMFLLNHVVDGSLDEGVAYGSYTAKSVTQYVFLAQRHFNINNLDNNWLRMH
FWFYYATLLPGFQRTVGIADSNYNWFYGPESQLVFLDKFILKNGAGNWLAQQIRKHRPKDGPMVPSTAQR
WSTLHTEFFWYDPQLTPQPPAGYGTAKMHMFPNWGVVTYGAGLPNTQTNTFVSFKSGKLGGRAVYDIVHF
QPYSWIDGWRSFNPGHEHPDQNSFTFAPNGQVFVSEALYGPKLSHLNNVLVFAPSPSSQCNQPWEGQLGE
CAQWLKWTGEEVGDAAGEIITASQHGEMIFVSGEAVSAYSSAMRLKSVYRALLLLNSQTLLVVDHIERQE
GSPINSVSAFFHNLDIDFKYIQYRFMNRFNGAMMDVWDAHYKMFWFDHHGNSPVGSIQEAEQAAEFKKRW
TQFVNVTFQMDSTITRIAYIFYGPYVNVSTCRFIDSSSTGLQISLNVNNTEHIVSIVTDYHNLNTRFSYL
GFGGFANVADQNQITHFGLGTEAIVKPLRHNRVIFPFGFKFNVAVGLILCISLAILTFQWRFYLSFRKLM
RWILILVITLWFIELLDVWSSCTQPICAKWTKKETEAGKKTGPSEGHYVDLPDVVITSLPGSGAEILKQL
FFNSSDFLYIRVPTAYIDIPKTEFEINSFVDACEWKVTDIHSGHFRLLRGWLQSLVQDTKIHLQNIHLRE
PSRGKLGQYFTMNKDKKRKLKRRESLLEQRSRMKSSFDRDAEYIRALRRHLVYYPSARPVLSLSSGSWTL
KLPFFQEVLGTSMRALYIVRDPRAWIYSMLYSSKPSLYTLKNVPEHLAKLFKIERGKGKCSLDSDYAFEY
EPLRKELAKSQSNTVSLLSHLWLANTAAALRINTDLLPTSYQLIKFEDIVHFPQKTTERIFAFLGIPLSP
ASLNQILFATSTNLFYLPYEGEISPTNANVWKHNLPRDEIKLIESICWTLMDRLGYPKFMD
>10029
MALMFTGYFLFLTLMIFIFSTCEESVSNFSGWAVFTDDTEQFKNQKVQDFRSNQKLHPNLYFDAGDIQTM
RQKSRTSHLHLFRAIRSAVTIMLSNPTYYLPPPKHADFAAKWNEIYGNNLPPLALYCLLCPEDKVAFEFV
LEYMDRMVSYKDWLVENAPGDEVPVGHSLTGFATAFDFLYNLLGNQRKQKYLEKIQIVTEEMYEYSKIRS
WGKQLLHNHQATNMIALLIGALVTGIDKGSKTNIWKQDVVDVMEKTMFLLNHIVDGSLDEGVAYGSYTSK
SVTQYVFLAQRHFNINNLDNNWLKMHFWFYYATLLPGYQRTVGVADSNYNWFYGPESQLVFLDKFILRNG
AGNWLAQQIRKHRPKDGPMVPSTAQRWSTLHTEYIWYDPKLTPQPPVDFGTAKMHTFPNWGVVTYGAGLP
NTQTNTFVSFKSGKLGGRAVYDIVHFQPYSWIDGWRSFNPGHEHPDQNSFTFAPNGQVFVSEALYGPKFS
HLNNVLVFAPSPSSQCNKPWEGQLGECAQWLKWTGEEAGDAAGEVITASQHGEMMFVSGEAVSAYSSAMR
LKSVYRALLLLNSQTLLVVDHIERQETSPINSVSAFFHNLDIDFKYIPYRFMNRYNGAMMDVWDAHYKMF
WFDHHGNTPVANIQEAEQAAEFKKRWTQFVNVTFHMESTITRIAYVFYGPYINVSSCRFIDSSSSGLQIS
LNVNNTEHSVSVVTDYQNLKSRFDYLGFGGFASVANQGQITRFGLGTQALVNPVRHDTVIFPFGFKFNIA
VGFILCISLVILTFQWWFYLSFRKLMRCVLILVIALWFIELLDVWSTCTQPICAKWTRTESKANEKTLIS
EGKHVDLPDVVITSLPGSGAEILKQLFFNSSDFLYIRIPTAYIDIPETEFEIDSFVDACEWKVSDIHTGH
FHLLRGWLLSLVQDTKLHLQNIHLHETSRNKLAQYFAANKDKKRKLKRRESLQEQRSRMKGAFDRDAEYI
RALRRHLVYYPSARPVLSLSSGSWTLKLHFFQEVLGTSMRALYIIRDPRAWIYSMLYGSKPSLYSLKNVP
EHLAKLFKIQEGKSKCSLNSGYAFEYESLKKELETSQSNTVSLLSHLWLANTAAAMRINTDLLPTSYQLV
KFEDIVHFPQKTTERIFAFLGIPLSPASLNQILFATSTNLFYLPYEGEISPSNTNIWKQNLPRDEIKLIE
SICWTLMDRLGYPKFVD
>7668
MEIYVISAFLLSLFMCAIDALTVDFSNYKPKYTTHPLLYFNKRDIPDLIAKASTTHEHITKVIDEAVTIL
MGNPKRFLPPTDYAKFGGIWNEYYGNNLPPLALYTVLHPEDKKAKIFLLEYMDLMAGHPKWQVIAAATDE
VPVAHSLTGFATAFDWIYNTLDSKRQKLYLQRIFNETKDFNRYIKIRSWGHFYLQNHVATNLLAFLHGAL
VVHAHLEEAKTWVETAVYKLEQNMKLFNHLIDGSSDEGVPYGSYTSRSMMQYIFLALRHFRIDHTKDIWV
KEHYWFYYHTVKPQFQRTLSVADSNHNWFYGPESQAVFLDAYVMKNGWGNWLAREIRNARPDPLTDTEKL
KSADSQRWCTIHTEYIWYDATIPAVPPPSSGKPTMHVFSDWGVVTYSSTDPRNPNDTFLSFKSGALMGAA
MSDVVKRDMYKSWPMNGWNSFNPGHEHPDQNTFEFVPNGRLFVTDGLYSSKLSHYNNILSFAPSPTSHCQ
EPWEGQLGECAKWLDWKNPDLVEYRGDLISTATSNDIVFIAGEAAPAYNPSMKLESVYRSLTLLNPNLLL
VFDHVEASESSPLTHLAAYFRNVQYSFELDKLSSLLQGASITMDGEKYSMYWISSDGRSTVAAVQEEKPS
QYQARPTSFVNMTFKLSPRITRLAYILCGPSIKLKNLQFLESIEDGVTMFVGTSDEDYQVMVSTKHSDPV
ARLRYLKYPGHATVQRLSKPSEIVKFGVAQSFFTETPSQLDSSPVKWILFIAFILSALAFFWFGKKTRLR
PRSRIHSIGIGLCFVWVIIWVSVINNCAIFGCDTDEELENSVRSSGHQAPLNTLNNKMLPSVVITSLPGS
GAELISWLFHENPDFIYMVAPSIYARLPRGDGIEVNPITDACEWNDSESLHSVKLKQWVQDMRWSPELFV
SSITDKNPQSDVHFTQEMIQAKKIGRRLLAVQEQPKIENKEFNDIIYKTFSPNSVRSHLEKYPNAQGVLF
FKSGGWTLKLPWINSVLKNTLHAIHFVRDPRAFVANYLRKSEELYKAMDVKQSIKDLFDQSEKSCVDDNG
QYAWEFEKLRAEYRANKNSALRLLASLWASHTGAILRKASDLPIGAFKLVKVEDLVMESEKTAEAIHRHI
GIPLRPTTLQKLIQAAKSSVYKLPYELAYSERSIDLWRRELNTEQITEIEQICGPVMVQLGYVRETKSMP
VNET
>30611
MPKERGTPWIMALMFTGHFLVLALLMFGFSTFEESVSNYSEWVVFTDDEEQFKTQKVQDFRPNQKLKKNM
LHPSLYFDAGDIQVMRQRSHTSHLHLFRAIRNAVTVMLSNPAYYLPPPKHADFAAKWNEIYGNNLPPLAL
YCLLCPEDKVAFEFVLEYMDRMVSYKDWLVENAPGDEVPIGHSLTGFATAFDFLYNLLDNHRRQKYLEKI
WIITEEMYEYSKIRPWGKQLLHNHQATNMIALLTGALVTGVDKESKANLWKQVVVDVMEKTMFLLNHIVD
GSLDEGVAYGSYTAKSVTQYVFLAQRHFKINNFENNWLKMHFWFYYATLLPGFQRTVGIADSNYNWFYGP
ESQLVFLDKFILKNGAGNWLAQQIRKHRPKDGPMVPSTAQRWSTLHTEYIWYDPQLTPQPPAEYGTAKLY
TFPNWGVVTYGAGLPNTQTNTFVSFKSGKLGGRAVYDIVHFQPYSWIDGWRSFNPGHEHPDQNSFTFAPN
GQVFVSEALYGPKLSHLNNVLVFAPSPSSQCNKPWEGQLGECAQWLKWTSEEVGDAAGEIITASQHGEMV
FVSGEAVSAYSASMRLKSVYRALLLLNSQTLLVVDHIERQEDSPINSVSAFFHNLDIDFKYIPYRFMNRY
NGAMMDVWDAHYKMFWFDHHGNSPMASIQEAEQAAEFKKRWTQFVNVTFQMESTITRIAYVFYGPYVNVS
SCRFIDNSNSGLQISLNVNNTEHVVSIVTDYHNLKTRFNYLGFGGFANVADQGQITRFGLGTQAIVKPVR
HDRVIFPFGFKFNIAVGLILCISLVILTFQWRFYLSFRKLMRWILILVVALWFIELLDVWSTCTQPICAK
WTRTEATGSKKALSSEGHHRDLPDVVITSLPGSGAEILKQLFFNSSDFLYIRVPTAYIDIPETEFEIDSF
VDACEWKVSDVHSGHFRLLRGWLQSLVQDTKLHLQNIHLHEPSRGKLAQYFTMNKDKKRKSRRRESLPEQ
RNRMKGAFDRDAEYIRALRRHLVYYPSARPVLSLSSGSWTLKLQFFQEVLGTSMRALYIVRDPRSWIYSM
LYSSKPSLYTLKNVPEHLAKLFKIEGEGKCNLNSGYAFEYESLRKELSKSKSNAVALLSHLWLANTAAAL
RINTDLLPSSYQLVKFEDIVHFPQKTTERIFAFLGIPLSPASLNQILFATSTNLFYLPYEGEISPTNTNV
WKQNLPRDEIKLIENICWTLMDRLGYPKFMD
>9597
MPKGGAPPWIMALMFTGHLLFLALLMFAFSTFEESVSNYSEWAVFTDDIDQFKTQKVQDFRPNQKLKKSM
LHPSLYFDAGEIQAMRQKSRTSHLHLFRAIRSAVTVMLSNPTYYLPPPKHADFAAKWNEIYGNNLPPLAL
YCLLCPEDKVAFEFVLEYMDRMVGYKDWLVENAPGDEVPIGHSLTGFATAFDFLYNLLDNHRRQKYLEKI
WVITEEMYEYSKVRSWGKQLLHNHQATNMIALLTGALVTGVDKGSKANIWKQAVVDVMEKTMFLLNHIVD
GSLDEGVAYGSYTAKSVTQYVFLAQRHFNINNLDNNWLKMHFWFYYATLLPGFQRTVGIADSNYNWFYGP
ESQLVFLDKFILKNGAGNWLAQQIRKHRPKDGPMVPSTAQRWSTLHTEYIWYDPQLTPQPPADYGTAKIH
TFPNWGVVTYGAGLPNTQTNTFVSFKSGKLGGRAVYDIVHFQPYSWIDGWRSFNPGHEHPDQNSFTFAPN
GQVFVSEALYGPKLSHLNNVLVFAPSPSSQCNKPWEGQLGECAQWLKWTGEEVGDAAGEIITASQHGEMV
FVSGEAVSAYSSAMRLKSVYRALLLLNSQTLLVVDHIERQEDSPINSVSAFFHNLDIDFKYIPYKFMNRY
NGAMMDVWDAHYKMFWFDHHGNSPMASIQEAEQAAEFKKRWTQFVNVTFQMESTITRIAYVFYGPYINVS
SCRFIDSSNPGLQISLNVNNTEHVVSIVTDYHNLKTRFNYLGFGGFASVADQGQITRFGLGTQAIVKPVR
HDRIIFPFGFKFNIAVGLILCISLVILTFQWRFYLSFRKLMRWILILVIALWFIELLDVWSTCSQPICAK
WTRTEAEGSKKSLSSEGHHMDLPDVVITSLPGSGAEILKQLFFNSSDFLYIRVPTAYIDIPETELEIDSF
VDACEWKVSDIRSGHFRLLRGWLQSLVQDTKLHLQNIHLHEPNRGKLAQYFAMNKDXKRKFKRRESLPEQ
RSQMKGAFDRDAEYIRALRRHLVYYPSARPVLSLSSGSWTLKLHFFQEVLGASMRALYIVRDPRAWIYSM
LYNSKPSLYSLKNVPEHLAKLFKIEGGKGKCNLNSGYAFEYEPLRKELSKSKSNAVSLLSHLWLANTAAA
LRINTDLLPTSYQLVKFEDIVHFPQKTTERIFAFLGIPLSPASLNQILFATSTNLFYLPYEGEISPTNTN
VWKQNLPRDEIKLIENICWTLMDRLGYPKFMD
>39432
MPKEGAPPWIMAVMFTGHLLFLALLMFAFSTSEESVSNYSEWAVFTDDIDQFKTQRVQDFRPNQKLKKSM
LHPSLYFDAGEIQAMRQKSRTSHLHLFRAIRSAVTVMLSNPTYYLPPPKHADFAAKWNEIYGNNLPPLAL
YCLLCPEDKVAFEFVLEYMDRMVGYKDWLVENAPGDEVPIGHSLTGFATAFDFLYNLLDNHRRQKYLEKI
WVITEEMYEYSKVRSWGKQLLHNHQATNMIALLTGALVTGVDKGSKANIWKQVVVDVMEKTMFLLNHIVD
GSLDEGVAYGSYTAKSITQYVFLAQRHFNINNLDNNWLKMHFWFYYATLLPGFQRTVGIADSNYNWFYGP
ESQLVFLDKFILKNGAGNWLAQQIRKHRPKDGPMVPSTAQRWSTLHTEYIWYDPQLIPQPPAEYGTAKIH
TFPNWGVVTYGAGLPNTQTNTFVSFKSGKLGGRAVYDIVHFQPYSWIDGWRSFNPGHEHPDQNSFTFAPN
GQVFVSEALYGPKLSHLNNVLVFAPSPSSQCNKPWEGQLGECAQWLKWTGEEVGDAAGEIITASQHGEMI
FVSGEAVSAYSSAMRLKSVYRALLLLNSQTLLVVDHIERQEDSPINSVSAFFHNLDIDFKYIPYRFMNRY
NGAMMDVWDAHYKMFWFDHHGNSPMASIQEAEQAAEFKKRWTQFVNVTFQMESTITRIAYVFYGPYINVS
SCRFIDNSNSGLQISLNVNNTEHVVSIVTDYHNLKTRFSYLGFGGFASVADQGQITRFGLGTQAIVKPVR
HDRVILPFGFKFNIAIGLILCISLVILTFQWRFYLSFRKLMRWILILVIALWFIELLDVWSTCTQPICAK
WSRTEAEESKKSLSSEGHHIDLPDVVITSLPGSGAEILKQLFFNSSDFLYIRVPTAYIDIPETEFEIDSF
VDACEWKVSDVRSGHFRLLRGWLQSLVQDTKLHLQNIHLHEPSRGKLAQYFTTNKDKKRKLKRRESLPEQ
RSQMKGAFDRDAEYIRALRRHLVYYPSARPVLSLSSGSWTLKLHFFQEVLGTSMRALYIVRDPRAWIYSM
LYNSKPSLYSLKNVPEHLAKLFKIEGGKGKCNLNSAYAFEYEPLRKELSKSKSNAVSLLSHLWLANTAAA
LRINTDLLPTSYQLVKFEDIVHFPQKTTERIFAFLGIPLSPASLNQILFATSTNLFYLPYEGEISPTNTH
VWKQNLPREEIKLIENICWTLMDRLGYPKFVD
>9685
MALMFTGHVLFLALVMFAFSTFEESVSNYSDWAVFAGDVDQFKTQKVQDFKPSQKLKKSMLHPSLYFDAG
EIQAMRQKSRTSHLHLFRAIRSAVTVMLSNPTYYLPPPKHADFAAKWNEIYGNNLPPLALYCLLCPEDKV
AFEFALEYMDRMVGYKDWLVENAPGDEVPVGHSLTGFATAFDFLYNLLDDHRRQKYLEKIGAVTEEMYEY
SKVRSWGKQLLHNHQATNMIALLTGALVTGVEKGSKANIWKQVVVDVMEKTMFLLNHIVDGSLDEGVAYG
SYTAKSVTQYVFLAQRHFSINNLDNNWLKMHFWFYYATLLPGFQRTVGIADSNYNWFYGPESQLVFLDKF
ILKNGAGNWLAQQIRRHRPKDGPMVPSTAQRWSTLHTEYIWYDPQLTPQPPAEYGTAKMHTFPNWGVVTY
GAGLPNTQANTFVSFKSGKLGGRAVYDIVHFQPYSWIDGWRSFNPGHEHPDQNSFTFAPNGQAFVSEALY
GPKLSHLNNVLVFAPSPTSQCNQPWEGQLGECGQWLRWTGEEVGDAAGEIITASQHGEMLFVSGEAVSAY
SSAMKLKSVYRALLLLNSQTLLVVDHVERQDGSPIKSVSAFFHNLDIDFKYIPYRFMNRYNGAMMDVWDA
HYRMFWFDHHGNSPIASIQEAEQAAEFKKRWTQFVNVTFQMESTITRIAYVFYGPYVNVSSCRFVDNSNS
GLQISLNVNNTEHVVSIVTDYHNLKTRFDYLGFGGFANVADQGQITRFGLGTQAIAKPIKQDRVIFPFGF
KFNIAVGLILCVSLVILTFQWRFYLSFRKLMQWILVLVVALWFIELLDVWSTCTQPICAKWARTEAEASP
KPVSSEGPHTDLPSVVVTSLPGSGAEILKQLFFNSSDFLYIRVPTTYIDIPETEFEIDSFVDACEWKASD
IHSVHFRLLRGWLQSLVQDTKLHLQNIHLHEPSRGKLAPYFTANKDKKRKLKRRESLPEQRSRMKGTFDR
DAEYIRALRRHLAYYPSARPVLSLSSGSWTLKLHFFQEVLGASMRALYIVRDPRAWIYSMLYSSKPSLYS
LKNVPEHLAKLFKIERGKGKCNLNSGYALEYESLRKELSKSQSNAVSLLSHLWLANTAAALRINMDLLPA
SYQLIKFEDIVHFPQKTTERIFAFLGIPLSPASLNQILFATSTNLFYLPYEGEISPTNTNVWKQNLPRDE
IRLIENICWTLMERLGYPKFTD
>9940
MALMFTGHCLFLVLVMFAFSTLEESVSNYSDWAVFTDDIDPFKIQRVQDVRANQKLKKSMLHPRLYFDAG
EIQAMRQKSRTTHLHLFRAIRSAVTAMLSNPTYYLPPPKHADFAAKWNEIYGNNLPPLALYCLLCPEDKV
AFEFALEYMDRMVGYKDWLVENAPGDEVPVGHSLTGFATAFDFLYNLLDGRRRQKYLEKIWVITEEMYEY
SKVRSWGKQLLHNHQATNMIALLTGALVTGVDKGTKVNLWKQVVVDVMEKTMFLLNHIVDGSLDEGVAYG
SYTAKSVTQYVFLAQRHFNINNLDNNWLKMHFWFYYATLLPGFQRTVGIADSNYNWFYGPESQLVFLDKF
VLKNGAGNWLAQQIRRHRPKDGPMVPSTAQRWSTLHTEYIWYDPQLTPQPPAEYGTAKMHLFPNWGVVTY
GAGLPNTQTNTFVSFKSGKLGGRAVYDIVHFQPYSWIDGWRSFNPGHEHPDQNSFTFAPNGQVFVSEALY
GPKLSHLNNVLVFAPSPTSQCNKPWEGQLGECAQWLKWTGEEVGDAAGEIITASQHGDMIFVSGEAVSAY
SSAMKLKSVYRALLLLNSQTLLVVDHVEKQEDSPIKSVSAFFHNLDIDFKYIPYRFTNKYNGALMDVWDA
HYKMFWFDHRGSSPVASIQEAEQAAEFKKRWTQFVNVTFQMESAITRIAYVFYGPYVNVSSCRFIDNTKS
GLQLSLNVNNTDHVVSIVTDYQNLKTRFDYLGFGGFATVADQAQVTRFGLGTEAIVKPIRRDRVIFPFGF
KFNVAVGLILCIGLVILTFQWRFYLSFRKLMRWILILVIALWSVELLDVWSACTQPICAKWARPETEVSG
QALAPGGQRTDLPDVVITSLPGSGAEILKQLFFNSSDFLYIRVPTAYIDIPETELEIDSFVDACEWRASD
VHSVRFRLLRGWLQSLVRDTKLHLQNIHLHESGRGKLAQYFTMNKDKKRKLKRRESLAEQRSRMKGAFDR
DAEYVRALRRHLVHYPSARPVLSLGSGSWTLKLHFFHEVLGASMKALYVVRDPRAWVYSMLYSSKPSLYS
LKNVQEHLAKLFKTEGGAGHCTLNSGYAVEYELLRKELLASRPHPVSLLAHAWLANTAAALRINAELLPT
SYQLIKFEDLVLFPQNTTERIFAFLGIPLSPATLNQILFATSTNLFYLPYEGEISPANTNVWKRNLPKDE
VKLIENICWTLMDRLGYPKFMD
>9595
MPKGGAPPWIMALMFTGHLLFLALLMFAFSTFEESVSNYSEWAVFTDDIDQFKTQKVQDFRPNQKLKKSM
LHPSLYFDAGEIQAMRQKSRTSHLHLFRAIRSAVTVMLSNPTYYLPPPKHADFAAKWNEIYGNNLPPLAL
YCLLCPEDKVAFEFVLEYMDRMVGYKDWLVENAPGDEVPIGHSLTGFATAFDFLYNLLDNHRRQKYLEKI
WVITEEMYEYSKVRSWGKQLLHNHQATNMIALLTGALVTGVDKGSKANIWKQAVVDVMEKTMFLLNHIVD
GSLDEGVAYGSYTAKSVTQYVFLAQRHFNINNLDNNWLKMHFWFYYATLLPGFQRTVGIADSNYNWFYGP
ESQLVFLDKFILKNGAGNWLAQQIRKHRPKDGPMVPSTAQRWSTLHTEYIWYDPQLTPQPPADYGTAKIH
TFPNWGVVTYGAGLPNTQTNTFVSFKSGKLGGRAVYDIVHFQPYSWIDGWRSFNPGHEHPDQNSFTFAPN
GQVFVSEALYGPKLSHLNNVLVFAPSPSSQCNKPWEGQLGECAQWLKWTGEEVGDAAGEIITASQHGEMV
FVSGEAVSAYSSAMRLKSVYRALLLLNSQTLLVVDHIERQEDSPINSVSAFFHNLDIDFKYIPYKFMNRY
NGAMMDVWDAHYKMFWFDHHGNSPMASIQEAEQAAEFKKRWTQFVNVTFQMESTITRIAYVFYGPYINVS
SCRFIDSSNPGLQISLNVNNTEHVVSIVTDYHNLKTRFNYLGFGGFASVADQGQITRFGLGTQAIVKPVR
HDRIIFPFGFKFNIAVGLILCISLVILTFQWRFYLSFRKLMRWILILVIALWFIELLDVWSTCSQPICAK
WTRTEAEGSKKSLSSEGHHMDLPDVVITSLPGSGAEILKQLFFNSSDFLYIRVPTAYIDIPETELGIDSF
VDACEWKVSDIRSGHFRLLRGWLQSLVQDTKLHLQNIHLHEPNRGKLAQYFAMNKDKKRKFKRRESLPEQ
RSQMKGAFDRDAEYIRALRRHLVYYPSARPVLSLSSGSWTLKLHFFQEVLGASMRALYIVRDPRAWIYSM
LYNSKPSLYSLKNVPEHLAKLFKIEGGKGKCNLNSGYAFEYEPLRKELSKSKSNAVSLLSHLWLANTAAA
LRINTDLLPASYQLVKFEDIVHFPQKTTERIFAFLGIPLSPASLNQILFATSTNLFYLPYEGEISPTNTN
VWKQNLPRDEIKLIENICWTLMDRLGYPKFMD
>8090
MAGSCTACWFFFLTLFAVGAAFSGVFNFTEKDFFTEDLQQVKLTQAGATEPWKLHSVDSHPSLYFNQADV
LHLRQRSSTTHSHIFKVIRAAVLTMLSNFPLYMPPVKHEEFTSKWNEIYGNNLPPLALYCLLCPEDSAAL
QFLIKFMDRMAEYPDWKVTSAPNDEVPMAHSLTGFATAYDFVYSYLDDRRRGLYLQKIRSETEALYEVSK
YRGWGKQYLQNHQTTNILAILTGAIVVGSHDLPESMIWKQVAVNYMEKTMFLLNHIIDGSLDEGVAYGSY
TAKSITQYVFLAQRHFKIDNTQNNWLRSHFWFYYATLLPGFQRTVGIADSNYNWFYGPESQLVFLDTFVM
KNGTGNWLAQQIRKHRPKDGPMGQSSAQRWATLHTEFLWYSSHLTPQPPQDFGKARMHIFSNWGVVTYGA
GLPTGQGNTFVSFKSSRLGGRAVYDIVHDKPYSWVDGWNSFNPGHEHPDQNSFTFAPNGQVFVSEALYGP
KYSYLNNVLVFGPSPTSQCNSPWEGQLGECAKWLRWTDEGVGDARGEVIVASSHGDSMFVSGEAVWAYSP
AMKLKSVFRALLLLNSQTLLVLDHVEKWGDSPVKSLSAFFHNLDIDFKYVPFKFMERFNGAMMDVWDAHY
KMFWFDSQGQSPETRIQEAEQAAEFKKRWTQYVNVTFPMTGAVSRVAYILHGPYAKVSNCRFIDNSRNGV
RLSLTINNTEKIVSIATNYKDIGARLTYLGFGGHCKVEDRYQITRYGVGTHLIPKQIAADSQLFDIGFTV
NVIAGVVLCVAIGFLTLQRKFYVCFSRLMRYALLSVLLLWIAELLFLSSSCDQLLCGVKWKGAGARSEVN
KQIRLYEQQRLPLPTVLITTLPGSGAELLKHLFYNTSDFVYIRVPTEHVEVPETEFEFDSLVDACEWSRA
DAVNGRFKMIQGWLQSLVHDTKLHLQNIQLAEGSRVKQTQRVGPSRDRKRRSRRREPASELKGTLRASLD
RDAEYIREMRRHVAEYPNARVVLNMRSGSWTLKLPFIQEAVGSSLRTIYVVRDPRAWIYLMVYNGNPSLY
SLKNIPQHLSLIFSKNSVGDGCPVVAPEFKILQRLLSHSETNPILTLAHLWLAHTAAALRVSKSLPEEAH
LLMRFEDLVSFPQETAETIHTFLGVPLSPAALNQLMFTTSTNLYNLMYEGEVSPANINMWRQKMPRKDVR
LIEDVCGAVMKRLGYTRFSR
>9733
MALMFTGHFLFLLLVMFAFSTFEESVSNYSDWAVFPDDIDQLKTQKVQDFRPNQKLKKTMLHPHLYFDAG
EIQAMRQKSRTSHLHLFRAIRSAVMVMLSNPTYYLPPPKHADFAAKWNEIYGNNLPPLALYCLLCPEDKV
AFEFVLEYMDRMVGYKDWLVENAPGDEVPVGHSLTGFATAFDFLYNLLDDHRRQKYLEKIWVITEEMYEY
SKVRSWGKQLLHNHQATNMIALLTGALVTGVDKGSKVNLWKQVVVDVMEKMMFLLNHIVDGTLDEGVAYG
SYTAKSVTQYVFLAQRHFNINNLDNNWLKMHFWFYYATLLPGFQRTVGIADSNYNWFYGPESQLVFLDKF
ILKNGAGNWLAQQIRRHRPKDGPMVPSTAQRWSTLHTEYIWYDPQLTPRPPAEYGTAKMHTFPNWGVVTY
GAGLPNTQTNTFVSFKSGKLGGRAVYDIVHFQPYSWIDGWRSFNPGHEHPDQNSFTFAPNGQVFVSEALY
GPKLSHLNNVLVFAPSPTSQCNKPWEGQLGECAQWLKWTGEEVGDAAGEIITASQHGDMVFVSGEAVSAY
SSAMKLKSVYRALLLLNSQTLLVVDHVERQEDSPIKSVSAFFHNLDIDFKYIPYRFMNRYNGAMMDVWDA
HYKMFWFDHRGSSPIASIQEAEQAAEFKKRWTQFVNVTFQMESTITRIVYVFYGPYVNVSSCRFIDNSNS
GLQISLNVNNTEHVVSIVTDYHNLKTRFDYLGFGGFASVADQVQITRFGLGTQAIVKPVRRDRVIFPFGF
KFNVAVGLILCVSLVILTFQWRFYLSFRKLMRWILTLVIALWFVELVDVWSTCTQPICAKWARPEAEASP
KPLSPQGHRIDLPDIVITSLPGSGAEILKQLFFNSSDFLYIRVPTAYIDIPETDFEIDSFVDACEWKASD
VHGVHFRLLRGWLQSLVQDTKLHLQNIHLHEPSRGKLAQYFTTNKDKKRKLKRRESLPEQRSRMKGAFDR
DAEYIRALRRHLVHYPSARPVLSLNSGSWTLKLHFFHEVLGASMRALYVVRDPRAWIYSMLYSSKPSLYS
LKNIPEHLAKLFKIEGGKGKCNLNSGYASEYESLRKELSKSKPHAVSLLAHVWLANTAAALRINTDLLPT
SYQMIKFEDIVHFPQKTTERIFAFLGIPLSPASLNQILFATSTNLFYLPYEGEISPTNTNVWKQNLPRDE
IKLIENICWTLMDRLGYPKFMD
>127582
MALMFTGHFLFLALVMFGFSTFEESVSNYSEWAVFTDEIDQFKTQKVQDFKPNQNPKKSLLHPSLYFDAG
EIQAMRQKSHTSHLHLFRVIRSAVTVMLSNPTYYLPPPKHADFAAKWNEIYGNNLPPLALYCLLCPEDKV
AFEFVLEYMDRMAGYKDWLVENAPGDEVPVGHSLTGFATAFDFLYNLLDNHRRQKYLEKIWVITEEMYEY
SKVRAWGKQLLHNHQATNMIALLTGALVTGADKGSKANIWKQIVVDVMEKTMFLLNHIVDGSLDEGVAYG
SYTSKSVTQYVFLAQRHFNINNLDNNWLKMHFWFYYATLLPGFQRTVGIADSNYNWFYGPESQLVFLDKF
ILKNGAGNWLAQQIRKHRPKDGPMVPSTAQRWSTLHTEYIWYDPQLTPQPPAEYGTAKMHTFPNWGVVTY
GAGLPNTQTSTFVSFKSGKLGGRAVYDIVHFQPYSWIDGWRSFNPGHEHPDQNSFTFAPNGQVFVSEALY
GPKLSHLNNVLVFAPSPSSQCNKPWEGQLGECSQWLRWTGEEVGDAAGEIITASQHGEMMFVSGEAVSAY
SSAMKLKSVYRALLLLNSQTLLVVDHIEKQEDSPINSVSAFFHNLDIDFKYIPYRFMNRYNGAMMDVWDA
HYKMFWFDHRGNSPMASIQEAEQAAEFKKRWTQFVNVTFPMESTILRIAYIFFGPYVNVSSCKFIDNSKS
GLQISLSVNNTEHVVSIVTDYHSLKTRFSYLGFGGYANVADQGQITRFGLGTQAIVKPVRHDRVIFPFGF
KFNIAVGLILCVSLVILAFQWQFYISFRKLMRWILILVIALWFIELLDVWSTCTQPICAKWTRTEAKASK
KALSSEEHHVSLPDVVITSLPGSGAEILKQLFFNSSDFLYIRVPTAYIDIPETEFEIDSFVDACEWKVSD
IRSGHFRLLRGWLQSLVQDTKLHLQNIHLHEPNRGKLAQYFTTNKDKKRKLKRRESLLEQRSRMKGTFDR
DAEYVRALRRHLVYYPSARPVLSLSSGSWTLKLNFFQEVLGASLRALYIVRDPRAWIYSILYSSKPSLYS
LKNVPEHLAKLFKTEGGKGKCNLNSGYAFEYESLRKELSKSRSNAVSLLSHLWLANTAAALRINTDLLPT
SYQLVKFEDIVHFPQKTTESIFAFLGIPLSLASLNQILFATSTNLFYLPYEGEISPTNINVWKQNLPRDE
IKLIENICWTLMDHLGYPKFMD
>9708
MALMFTGHFLFLALVMFAFSTFEESVSNYSDWAVFTDDIDQFKTQKVQDFKPSQKLKKSMLHPSLYFDAG
EIQAMRQKSRTSHLHLFRAIRSAVTVMLSNPTYYLPPPKHADFAAKWNEIYGNNLPPLALYCLLCPEDKV
AFEFVLEYMDRMVGYKDWLVANAPGDEVPVGHSLTGFATAFDFLHNLLDDHRKQKYLEKVWAVTEEMYEY
SKVRSWGKQLLHNHQATNMIALLTGALVTGVDKGSKANVWKQVVVDVMEKTMFLLNHVVDGSLDEGVAYG
SYTAKSVTQYVFLAQRHFNINNLDNNWLKMHFWFYYATLLPGFQRTVGIADSNYNWFYGPESQLVFLDKF
ILKNGAGNWLAQQIRRHRPKDGPMVPSTAQRWSTLHTEFIWYDPQLTPQPPAEYGTAKMHTFPNWGVVTY
GAGLPNTQTNTFVSFKSGKLGGRAVYDIVHFQPYSWIDGWRSFNPGHEHPDQNSFTFAPNGQVFVSEALY
GPKLSHLNNVLVFAPSPTSQCNKPWEGQLGECAQWLKWTGEEAGDAAGEIVTASQHGEMIFVSGEAVSAY
SSAMKLKSVYRALLLLNSQTLLVVDHVEKQDNSPIKSVSAFFHNLDIDFKYIPYRSMNRYNGAMMDVWDA
HYRMFWFDHHGNSPIASIQEAEQAAEFKKRWTQFVNVTFHMESTITRIAYVFYGPYVNVSSCRFIDNSNS
GLQISLNVNNTEHVVSIVTDYHNLKTRFDYLGFGGFANVADQGQITRFGLGTQAIAKPVRQDRVIFPFGF
KFNIAVGLILCISLVILTFQWRFYLSFRKLMRWILILVIALWFIELLDVWSTCSQPLCAKWARTEAEASP
KSLSSEGHHLDLPYVVITSLPGSGAEILKQLFFNSSDFLYIRVPTAYIDIPETEFEIDSFADACEWKASD
IHSVHFRLLRGWLQSLVQDTKLHLQNIHLHEPSRGKLAPYFTANKDKKRKLKRRESLPEQRSRMKGTFDR
DAEYIRALRRHLVYYPSARPVLSLSSGSWTLKLHFFQEVLGASMRALYIVRDPRAWIYSMLYSSKPSLYS
LKNVPEHLAKLFKIEGGKGKCILNSGYAFEYESLRKELSKSKSNAVSLLSHLWLANTAAALRINTDLLPT
SYQLIKFEDIVHFPQKTTERIFAFLGIPLSPASLNQILFATSTNLFYLPYEGEISPSNTNVWKQNLPRDE
IKLIENICWSLMERLGYPKFMD
>73337
MALMFTGHFLFLALVMFAFSTFEESVSNYSDWAVFTDDIDQFKTQRVQDFRPHEKLKKSMLRPSLYFDAG
EIQAMRQKSRTSHLHLFRAIRNAVTIMLSNPTYYLPPPKHADFAAKWNEIYGNNLPPLALYCLLCPEDRV
AFEFVLEYMDRMVGYKDWLVENAPGDEVPVGHSLTGFATAFDFLYNLLDNHRRQKYLEKIWTITEEMYEY
SKVRSWGKQLLHNHQATNMIALLTGALVTGVDKGSKVNIWKQVVVDVMEKTMFLLNHIVDGSLDEGVAYG
SYTAKSVTQYVFLAQRHFNINNLDNNWLKMHFWFYYATLLPGFQRTVGIADSNYNWFYGPESQLVFLDKF
ILKNGAGNWLAQQIRRHRPKDGPMVPSTAQRWSTLHTEYIWYDPQLTPQPPAEYGTAKMHMFPNWGVVTY
GAGLPNTQTNTFVSFKSGKLGGRAVYDIVHFQPYSWIDGWRSFNPGHEHPDQNSFTFAPNGQVFVSEALY
GPKLSHLNNVLVFAPSPTSQCNKPWEGQLGECAQWLKWIGEEVGDAAGEVITASQQGEMIFVSGEAASAY
SSAMKLKSVYRALLLLNSQTLLVVDHVERQEDSPIKSVSAFFHNLDIDFKYIPYRFMNSYNGAMMDVWDA
HYKMFWFDHHGSSPIASIQEAEQAAEFKKRWTQFVNVTFQMESTITRIAYVFYGPYVNVSSCRFIDNSDS
GLQISLNVNNTEHVVSIVTDYHNLKTRFDYLGFGGFASVADQGQITRFGLGTQAIVKPIRRDRVIFPFGF
KFNIAVGLILCISLVILTFQWRFYLSFRKLMRWILILVVALWFIELLDVWSTCTQPICAKWAKTEAEAST
KSSSPEGHHIDLPDVVITSLPGSGAELLKQLFFNSSDFLYIRVPTAYIDIPETEFEIDSFVDACEWKASD
IHSVHFRLLRGWLQSLVQDTKLHLQNIHLHEPSRSKLAQYFAANKDKKRKLKRRESLPEQRSRMKGAFDR
DAEYIRALRRHLVYYPSARPVLSLSSGSWTLKLHFFQEVLGASMRALYVVRDPRAWIYSMLYSSKPSLYS
LKNVPGHLAKLFKVEGGKGKCNLNSGYAVEYESLRKELSKSTSNAVSLLSHLWLANTAAALRINTDLLPT
SYQLIKFEDIVHFPQKTTEKIFAFLGIPLSPASLNQILFATSTNLFYLPYEGEISPTNTDVWKQNLPREE
IKLIESVCWTLMDRLGYPKFTD
>106582
MCSQTPGKMAGSWVVYSAFLLPLFAVGTAFSGVFNTTDRDVFTDDLLQVKLTQDRASEHWKLQSADSHPN
LYFNQVDVLHLRQRSSTTHSHIFKVIRAAVLTMLSNVPFYLPPVKHEEFTSKWNEIYGNNLPPLALYCLL
CPEDSAALQFLIKFMDRMAEYSDWKVTSAPNDEVPMAHSLTGFATAYDFIYSYLDQRRKDLYLKKIRAET
VELYELSKYRGWGKQYLQNHQTTNILAILTGAIVVGSHDDPESMIWKQVAVNYMEKTMFLLNHVVDGSLD
EGVAYGSYTAKSITQYVFLAQRHFNIDNMQNNWLRGHFWFYYATLLPGFQRTVGIADSNYNWFYGPESQL
VFLDTFIMKNGTGNWLAQQIRKHRPKDGPMGQSSAQRWATLHTEYIWYNSHLTPQPPHDFGKAKMHIFSN
WGVVTYGAGLPNGQSNTFVSFKSGSLGGRAVYDIVHDKPYSWVDGWNSFNPGHEHPDQNSFTFAPNGQVF
VSEALYGPKYSYLNNVLVFSPSPTSQCNNPWEGQLGECAKWLRWTDEGVGDARGEVIAALSHKDTMFVSG
EAVLAYSPAMRLKSVFRALVLLNSQTLLVLDHVEKWGDSPIKSLSAFFHNLDIDFKYVPFRFMDRYNGAM
MDVWDAHYKMFWFDTQGHSPETRIQEAEQAAEFKKRWTQYINVTFQMTGPVSRVAYVLHGPYVKVSNCRF
IDNSKNGVRLSLIINNTEKIVSIATNYKDIGARLSYLGFGGHSKVEDRYQITRYGLGTQILPKQISSDNQ
LFDFGFTVNVIAGVVLCVAIGFLTMQRKFYVCFSRLMRYALLTVLILWIAELLFVSNSCDQLLCGVKWKG
AGAKSEVNKQIRLYEQHRLPLPTVVITTLPGSGSEILKHLFYNSSDFVYIRVPTEHVDIPETEFEFDTLV
DACEWSRSDAVNARFKIIQGWLHSLVHNTKLHLQNIQLVEGSRVKQTQRVSVPRDRKKRSRKREPASDLK
GKLRASLDRDAEYVREMRRHVAEYPNARVVINMQSGSWTLKLPFIQEVVGLSLRTIYLVRDPRAWIYLMV
YNSKPSLYSLKNIPQHLSLIFKEDAVRDGCSAVAPEFKMIQRLLSRYETNPVLILAHLWLAHTAAALRVS
ESLPEESFLRVRFEDVVNFPQETAETIHTFLGVPVSPTALNQLIFTTSTNLYNLMYEGDISPANINIWRQ
KMSRKDVRLIEDVCGSVMKRLGYTRFTS
>9978
MALMFIGHFLFLALVMFGFCTLEESVSNYSEWAVFTDNVDQFKTQKVEDIKPNQKLKKSILHPSLYFDAG
EVQSLRQKSHTSHLHLFRAIRNAVTVMLSNPTYYLPPRKHADFAAKWNEIYGNNLPPLALYCLLCPEDKV
AFEFVLEYMDRMVAYKDWLVENAPGDEVPIGHSLTGFATAFDFLYNLLDNHRRRNYLEKIWVITEEMYEY
SKIRSWGKQLLHNHQATNMIALLTGALVTGVDKDSKANIWKQVVVDVMEKTMFLLNHVVDGSLDEGVAYG
SYTAKSVTQYVFLAQRHFNINNLDNNWLKMHFWFYYATLLPGFQRTVGIADSNYNWFYGPESQLVFLDKF
ILKNGAGNWLAQQIRKHRPKDGPMVPSTAQRWSTLHTEYIWYDPQLTPQPPAEYGTAKMHTFPNWGVVTY
GAGLPNTQANTFVSFKSGKLGGRAVYDIVHFQPYSWIDGWRSFNPGHEHPDQNSFTFAPNGQVFVSEALY
GPKLSHLNNVLVFAPSPSSQCNKPWEGQLGECAQWLKWTGEEVGDAAGEIITASQHGEMIFVSGEAVSAY
SSAMRLKSVYRALLLLNSQTLLVVDHIEREKDSPINSVSAFFHNLDIDFKYIPYKFMNSYNGAMMDVWDA
HYKMFWFDHHGSSPVASIQEAEQAAEFKKRWTQFVNVTFQMESTVTRIAYIFYGPYVNVSGCRFIDNSNS
GLQISLNVNNTEHIVSIVTEYHNLKARFNYLGFGGFANVADEGQITRFGLGTQAIVKPVRHERVIFSFGF
KFNIAVGFILCISLIILTLQWRFYLSFRKLMRWILIFVIALWFIELLDVWSTCTQPICAKWTRTEAEASK
KALSTQGYHVDLPDVVITSLPGSGAEILKQIFFNSSEFLYIRVPTAYIDIPETEFEIDSFVDACEWKVSD
IRSGHFRLLRGWLQSLVQDTKLHLQNIHLHEPSRGKLAQYFAMNKDKRRKSKRKESLPEQRSRMKGAFDR
DAEYIRALRRHLMYYPSARPVISLSSGSWTLKLHFFQEVLGASMRALYVVRDPRAWIYSMLYSSKPSLYS
LKNVPEHLAKLFKIDGDKGKCSLNSGYAFEYEPLRKELSKSKSNAVSLLSHLWLANTAAALRINTELLPT
RYQLVKFEDIVHFPQKTTERIFAFLGIPLSPASLNQILFATSTNLFYLPYEGEISPTNTNIWKQNLPRDE
IKLIESICWTLMDRLGYPKFME
>42254
MALMFTGHFLFLTLVMFAFSTFEESVSNFSDWAVFAEDMDQFKTQKVRDFRPSQKLKKSTLHPSLYFDAG
EIQALRQKSRTSHLHLFRALRSAVTAMLSNPTYYLPPPKHADFAAKWNEIYGNNLPPLALYCLLCPEDKV
AFDFVLEYMDRMVSYKDWLVENAPGDEVPIGHSLTGFATAFDFLCNLLDDHRRQRYLDKIVVITEEMYEY
SKVRSWGKQLLHNHQATNMIALLTGALVIGIDKGPEVNVWKQVVVDVMEKTMFLLNHIVDGSLDEGVAYG
SYTAKSVTQYVFLAQRHFNINNLDNNWLRMHFWFYYATLLPGFQRTVGIADSNYNWFYGPESQLVFLDRF
ILRNGAGNWLAQQIRKHRPKDGPMVPSTAQRWSTLHTEYIWYDPQLTPQPPAEYGTAKMHVFPNWGVVTY
GAGLPNTQTNTFMSFKSGKLGGRAVYDIVHFQPYSWIDGWRSFNPGHEHPDQNSFTFAPNGQVFVSEALY
GPKLSHLNNVLVFAPSPTSQCNKPWEGQLGECAQWLKWTGEEVGDAAGDIITASEQGEMVFVSGEAVSAY
SSAMKLRSVYRALLLLNSQTLLVVDHVEKQRDSPLKSVSAFFHNLDIDFKYIPYKFMNRYNGAMMDVWDA
HYKMFWFDHHGDSPVASIQEAEQAAEFKKRWTQFVNVTFHLDSSMTRIAYVFHGPYVNVSGCRFLDHSTS
GLQISLNVNNTEHVVSIVTDYQNLKTRFDYLGFGGFASVADQGQITRFGLGTQAIVKPIQRDRVIFPFGF
KFNIAVGLILCISLVILTFQWRFYLSFRKLMRWILILVVALWFIELLDVWSTCTQPICAKWARTTEEEAR
TKALQPGGHHGELPDVVIASLPGSGAEILKQLFFNSSDFLYIRVPTAYIDLPETELDIDSFVDACEWKVA
EIRSVQFRLLRGWLQSLVHDTKLHLQNIHLHEPSRGRLAQYSATNKDRKRKVKRRESLPEQRSRMKGAFD
RDAEYIRALRRHLVFYPSARPVLSLSSGSWTLKLRFFQEVLGASMRALYVVRDPRAWVYSMLYSSRPSLY
SLKNVPEHLAKLFKIEGRKGKCNLNAGYAFEYDALREELSKPKSNAVSLLAHLWLANTAAALRINADLLP
ASYQLIKFEDIVHFPQKTTEKIFAFLGIPLSPASLNQILFATSTNLFYLPYEGEISPTNTNVWKQNLPRE
EMKVIENICGTLMERLGYPKLTD
>51337
MALMFTGHFLFLMLVMFGFSTCEKSVSNYSEWAVFADDLDQFKSQKVQDLRHNPELKRMLHPSLYFDAAD
IQAMRLKSRTSHSHLFRALRSAVMAMLSNPTYYLPPPRHADFAAKWNEIYGNNLPPLALYCLLCPEDKVA
FEFVLEYMDRMASYKDWVVENAPGDEVPIGHSLTGFATAFDFLYNLFDDYRKQRYLEKIWVITEDMYEYS
KIRSWGKQLLHNHQATNMMALLIGALVTGVDKESKANIWKQVVVDVMEKTMFLLNHIVDGSLDEGVAYGS
YTAKSVTQYVFLAQRHFNINNLDNNWLKMHFWFYYATLLPGFQRTVGIADSNYNWFYGPESQLVFLDKFV
LKNGAGNWLAQQIRKHRPKDGPMVASTAQRWSTLHTEYIWYDPQLTPQPPAEFGTAKMHTFPNWGVVTYG
AGLPNTQTNTFVSFKSGKLGGRAVYDIVHFQPYSWIDGWRSFNPGHEHPDQNSFTFAPNGQVFVSEALYG
PKLSHLNNVLVFAPSPSSQCNKPWEGQLGECAQWLKWTGDEVGDAAGEIITASQHGEMLFVSGEAVSAYS
SAMRLKSVYRALLLLNSQTLLVVDHIERDVASPVNAVSAFFHNLDIDFKYIPYRFMNRYNGAMMDVWDAH
YKMFWFDHHGHSPVANIQEAEQAAEFKKRWTQFVNVTFQIDSTITRIAYVFYGPYVNVSSCRFVDSSNSG
LQISVNVNNTEQVISIVTDYHNLKSRFSYLGFGGFANVADQGQITRFGLGTQAVIKTMRHDRVIFSFGFK
FNIAVGLILCISLVILTFQWRFYLSFKKLMRWILILVIALWCIELLDVWSTCTQPICTKWTQAEAKASEK
AVTPEGHHVDLPDVVITSLPGSGAEILKQLFFNSSDFLYIRIPTAYIDIPETEFEIDSFVDACEWKASDI
HSGHFRLLRGWLLSLVQDTKLHLQNIHLHEPSRGKLAQYSIMNKDKKRKSKRRESLPEQRSRMKGAFDRD
AEYIKALRRHLVYYPSARPVLSLSSGSWTLKLHFFQEVLGTSLRALYIVRDPRAWIYSMVYGSKPSLYTL
KNVPEHLAKLLKIDEGKGRCNINSGYAFEYESLRKELATSTSSAVTLLSHLWLANTAAALRINTDLLPTS
YHLVKFEDIVYSPQETTERIFAFLGIPLSPASLNQILFATSTNLFYLPYEGEISPTHINVWKKNLPRDEI
KLIENICWTLMNRLGYPKFMD
>9371
MALMFTGHFLFLALVMFGFSTFEESVSNYSEWAVFTDEIEQFKTQKVQDFRPIQKPKKSMLHPSLYFDAG
EIQALRQKSHTSHLHLFRAIRSAVTVMLSNPTYYLPPPKHADFAAKWNEIYGNNLPPLALYCLLCPEDKV
AFEFVLEYMDRMVGYKNWLVENAPGDEVPIGHSLTGFATAFDFLYNLLDNHRRQKYLEKIWVITEEMYEY
SKVRSWGKQLLHNHQATNMIALLTGALVTGTDKGYQANMWKQIVVEVMEKTMFLLNHVVDGSLDEGVAYG
SYTSKSVTQYVFLAQRHFNINNLGNNWLKMHFWFYYATLLPGFQRTVGIADSNYNWFYGPESQLVFLDKF
ILKNGAGNWLAQQIRKHRPKDGPMVPSTAQRWSTLHTEYIWYDPQLTPQPPAEYGTAKMHTFPNWGVVTY
GAGLPNTQTNTFVSFKSGKLGGRAVYDIVHYQPYSWIDGWRSFNPGHEHPDQNSFTFAPNGQVFVSEALY
GPKLSHLNNVLVFAPSPSSQCNKPWEGQLGECAQWLRWTGEEVGDTAGEIITASQHGEMMFVSGEAVSAY
SSAMKLKSVYRALLLLNSQTLLVVDHIEKHENSPINSVSAFFHNLDIDFKYISYRFMNRYNGAMMDVWDA
HYKMFWFDHRGNSPIASIQEAEQAAEFKKRWTQFVNVTFPMESTIMRIAYIFYGPYVNVSSCKFMDNSKS
GLQISLNVNHTEHVVSIVTDYHNLKTRFNYLGFGGYATVTDQVQITRFGLGTQAILMPIRHDRVIFPFGF
KFNIAFGFILCISLVILAFQWQFYISFRKLMRWILILVIALWFIELLDVWSTCTQPICAKWTRTEAKASK
KAVSSEEHHASLPNVVITSLPGSGAEILKQLFFNSSDFLYIRVPTTYIDIPKTEFEIGSFVDACEWKVSD
IHSDRFRLLRGWLQSLAQDTKLHLQNIHLHEPSRGKLAQYFTTNKDKKRKLKRRESLQDQRSKMKGTFDR
DAEYVRALRRHLVYYPSARPVLSLSSGSWTLKLPFFQEVLGASLKALYVIRDPRAWVYSVLYSSKPSLYS
LKNVPEHLAKLFEIEGDKGKCNLDFGYAFEYESLRKEFSKPQANAVSLLSHLWLANTAAALRINTDLLPT
SYQLVKFEDIVHFPQKTTERIFAFLGIPLSLATLNQILFATSTNLFYLSYEGEISPTNINVWKQNLPTEE
IKLIENICWTLMDRLGYPKFMD
>10160
MALMFTGHFLFLTLVMFGFSTLEEPVSNYSEWAVFTDDIDQFKMQKVHDVRPKQKLRRSMLHPSLYFDAG
EIQAMRQKSRTSHSHLFRAIRSAVTVMLSNPTYYLPPPKHADFAAKWNEIYGNNLPPLALYCLLCPEDKV
AFEFVLEYMDRMVGYKDWLVENAPGDEVPIGHSLTGFATAFDFLYNLLDNHRRQEYLEKIWVITEEMYEY
SKVRSWGKQLLHNHQATNMIALLTGALVAGVEKGSKANIWKQVVVDVMEKTMFLLNHIVDGSLDEGVAYG
SYTAKSVTQYVFLAQRHFNINNLDNNWLRMHFWFYYATLLPGFQRTVGIADSNYNWFYGPESQLVFLDKF
ILKNGAGNWLAQQIRKHRPKDGPMVPSTAQRWSTLHTEFVWYDPQHTPQPPAGYGTAKMHVFPNWGVVTY
GAGLPNTQTNTFVSFKSGKLGGRAVYDIVHFQPYSWIDGWRSFNPGHEHPDQNSFTFAPNGQVFVSEALY
GPKLSHLNNVLVFAPSPSSQCNKPWEGQLGECAQWLKWTGEEVGDAAGEIITASQHGEMILVSGEAVSAY
SSAMRLKSVYRALLLLNSQTLLVVDHIERQESSPINSVSAFFHNLDIDFKYIPYRFMNKYNGAMMDVWDA
HYKMFWFDQHGNSPVGSIQEAEQAAEFKKRWTQFVNVTFQMDSTITRIAYIFYGPYVNVSSCRFIDSSNT
GLQISLNVNNTEHVVSIVTDYHNLNTRFRYLGFGGFASVANQNQITRFGLGTEAIVKPARQDRVIFPFGF
KFNLAIGLILCISLVILTFQWRFYLSFRKLMRWILILVIALWFIELLDVWSTCTQPICAKWTKKETEASK
KTVSSEGRYVDLPDVVITSLPGSGAEILKQLFFNSSDFLYIRVPTAYIDIPKTEFEINSFVDACEWKVTD
IHSGHFRLLRGWLQSLVQDTKIHLQNIHLREPSRGKLAQYFTMNKDKKRKLKRRESLLEQRSRMKSSFDR
DAEYIRALRRHLIYYPSARPVLSLSSGSWTLKLPFFQEVLGTSMRALYIVRDPRAWIYSMLYSSKPSLYA
LKNVPEHLAKLFKIGSKGKCGLNSNYAIEYEPLRKELASSQSNAVSLLSHLWLANTAAALRINTNLLPTH
YQLIKFEDLVHFPQTTTERVFAFLGIPLSPASLNQILFATSTNLFYLPYEGEISPSNANVWKQNLPRDEI
KLIEDICWTLMDHLGYPKFMD
>143302
MALMFTGHCLFLTLAVFAFSAFEDSVSNYSDWAVFTDDLDQFKTQEVQEFRPNQKLPKSVPHPSLYFDAG
DIPALRHRSRTSHLHLFRAIRSAVTVMLSNPTYYLPPPKHADFAAKWNEIYGNNLPPLALYCLLCPEDRV
AFAFALEYMDRLVGYKDWLVENAPGDEVPIGHSLTGFATAFDFLYTLLDHPRRQRYLDKIWAVTEEMYEY
SKVRSWGKQLLHNHQATNMLALLTGALVTGAGRGAQVSVWKQVVVDVMEKTMFLLNHVVDGSLDEGVAYG
SYTAKSVTQYVFLAQRHFNINNLDNNWLKMHFWFYYATLLPGFQRTVGIADSNYNWFYGPESQLVFLDKF
ILKNGAGNWLAQQIRKHRPKDGPMVPSTAQRWSTLHTEYIWYDPQFAPQPPPDYGTAKMHMFPNWGVVTY
GAGLPNTQANTFVSFKSGKLGGRAVYDIVHFQPYSWIDGWRSFNPGHEHPDQNSFTFAPNGQVFVSEALY
GPKLSHLNNVLVFAPSPTSQCNQPWEGQLGECAQWLKWTGEEVGDAAGEIVTASQHGDMLFVSGEAASAY
SSAMKLKSVYRALLLLNSQTLLVVDHVERQDDSPIQSVSAFFHNLDIDFKYIPYKFMSRYNGAMMDVWDA
HYKMFWFDQHGRSPVASIQEAEQAAEFKKRWTQFVNVTFQMASTVTRIAYVFYGPYVNVSSCRFIDNSDS
GLQISLHVNNTEHIVSMVTDYPNLKTRFDYLGFGGFASVADQGQITRFGVGTEAIAKPVRRDRVIFPFGF
KFNIAVGLILCISLLILTCQWRFYLSFKKLMRWILILVIALWFIELLDVWTSCTQPICAKWTRTEAAANA
KTSPPEGHHLHLPNVVITSLPGSGAEILKQLFFNSSDFLYIRVPTAYIDIPETEFEIDSFVDACEWRAAD
VRGTRFRLLRGWLQSLVQDTKLHLQNIHLHEPSRGKLAQYFAANKDKKRKLKRRESLPEQRSRMKGAFDR
DAEYIRALRRHLVFYPSARPVLSLSSGSWTLKLPFFQEVLGASMRALYVVRDPRAWVYSMLYGSKPSLYS
LKNVPEHLGKLFKIEGGKGKCNLNYAVEYESLRQELSNSRSSTVSLLSHLWLANTAAALRISTDLRPGSY
QLVKFEDIVRFPQKTTERIFAFLGIPLSPASLNQILFATSTNLFYLPYEGEISATSTHVWKQNLPRDEIK
LIENICWTLMDRLGYPKFRG
>9669
MPKEGTPRWIMALMFTGHFLFLALVMFAFSTFEESVSNYSDWAVFTDDIDQFKTQKVQDFEPHQKLKKSV
LHPSLYFDAGEIQAMRQKSRTSHLHLFRAIRSAVTVMLSNPTYYLPPPRHADFAAKWNEIYGNNLPPLAL
YCLLCPEDKVAFEFVLEYMDRMVGYKDWLVENAPGDEVPIGHSLTGFATAFDFLYNLLDDHRRQKYLEKI
WAVTEEMYEYSKVRSWGKQLLHNHQATNMIALLTGALVTGVDKGSKANIWKQAVVDVMEKTMFLLNHIVD
GSLDEGVAYGSYTAKSVTQYVFLAQRHFNINNLDNNWLKMHFWFYYATLLPGFQRTVGIADSNYNWFYGP
ESQLVFLDKFILKNGAGNWLAQQIRRHRPKDGPMVPSTAQRWSTLHTEFIWYDPQLTPQPPAEYGTAKMH
TFPNWGVVTYGAGLPNTQTNTFVSFKSGKLGGRAVYDIVHFQPYSWIDGWRSFNPGHEHPDQNSFTFAPN
GQVFVSEALYGPKLSHLNNVLVFAPSPTSQCNKPWEGQLGECAQWLKWTGEEAGDAAGEIITASQHGEMI
FVSGEAVSAYSSAMKLKSVYRALLLLNSQTLLVVDHVERQDSSPIKTVSAFFHNLDIDFKYIPYRFLNRY
NGAMMDVWDAHYRMFWFDHRGRSPIASIQEAEQAAEFKKRWTQFVNVTFQMESTITRIAYVFYGPYVNVS
SCRFIDNSNSGLQISLNVNNTEHVVSIVTDYHNLKTRFDYLGFGGFANVADEGQITRFGLGTQAIAKPVR
QDRVIFPFGFKFNIAVGLILCISLVILTFQWRFYLSFRKLMRWILALVIALWFIELLDVWSTCTQPLCAK
WARTEAEASSKSSSSQEHRLHLPDVVITSLPGSGAEILKQLFFNSSDFLYIRVPTTYIEIPETEFEIDSF
VDACEWKASEIHSVHFRLLRGWLQSLVQDTKLHLQNIHLHEPSRGKLAQYFTANKDKKRKLKRRESLPEQ
RSRMKGTFDRDAEYIRALRRHLVYYPSARPVLSLSSGSWTLKLRFFQEVLGASMRALYIVRDPRAWIYSM
LYSSKPSLYSLKNVPEHLAKLFKIEGGKSKCNLNSGYAFEYESLRRELAKPKSDAVSLLSHLWLANTAAA
LRINTDLLPTSYQLIKFEDIVHFPQKTTERIFAFLGIPLSPASLNQILFATSTNLFYLPYEGEISPTNTN
VWKQNLPRDEIKLIENICWTLMERLGYPKFTD
>10181
MALMFTGHFLFLTVVMFGFSTLEESMSNYSEWAVFTDDIHQFKTQKVQDVRPKQKLRRSMLHPSLYFDAG
EIQAMRQKSHTSHLHLFRAIRSAVTIMLSNPTYYLPPPKHADFAAKWNEIYGNNLPPLALYCLLCPEDKV
AFEFVLEYMDRMVGYKDWQVENAPGDEVPIGHSLTGFATAFDFLYNLLDNHRRQKYLEKIWIVTEEMYEY
SKVRSWGKQLLHNHQATNMIALLTGALVTGVEKGSEANIWKQVVVDVMEKTMFLLNHVVDGSLDEGVAYG
SYTAKSVTQYVFLAQRHFNINNLDNNWLKMHFWFYYATLLPGFQRTVGIADSNYNWFYGPESQLVFLDKF
ILKNGAGNWLAQQIRKHRPKDGPMVPSTAQRWSTLHTEYVWYDPQLTPQPPADYGTAKMHMFPNWGVITY
GGGLPNTQTNTFVSFKSGKLGGRAVYDIVHFQPYSWIDGWRSFNPGHEHPDQNSFTFAPNGQVFVSEALY
GPKLSHLNNVLVFAPSPSSQCNKPWEGQLGECAQWLKWTGEEVGDAAGEIITASQHGEMIFVSGEAVSAY
SSAMRLKSVYRALLLLNSQTLLVVDHIERQETSPINSVSAFFHNLDIDFKYIPYRFMNRYNGAMMDVWDA
HYKMFWFDHRGNSPVGSIQEAEQAAEFKKRWTQFVNVTFQMDSTITRIAYVFYGPYVNVSSCRFIDSSNS
GLQISLHVNNTEHIVSIVTDYYNLNTRFSYLGFGGFANVADQNQITRFGMGTEAIVKSVRHDRVIFPFGF
KFNIAVGLILCISLVILTFQWRFYLSFRKLMRWILILVIALWFIELLDVWTTCTQPICAKWTKKEAEASK
KAMSSEGHYLDLPDVVITSLPGSGAEILKQLFFNSSDFLYIRVPTAYIDIPETEFEIDSFIDACEWKVTD
IRSGHFRLLRGWLQSLVQDTKIHLQNIHLHEPSRGKLAQYFTMNKDKKRKLKKKESLLEQRSRMKSSFDR
DAEYIRALRRHLIYYPSARPVLSLSSGSWTLKLPFFQEVLGTSMRALYIVRDPRAWIYSMLYSSKPSLYT
LKNVPEHLAKLFKKEESKGKCGLNSDYAFEYEALQNELARSKLNAVSLLSHLWLANTGAALRINKNLQPT
SYQLIKFEDIVHFPQKTTERIFAFLGIPLSPASLNQILFATSTNLFYLPYEGEISPTNANAWKQNLPRDE
IKLIENICWTLMDRLGYPKFMD
>9031
MALMLTGHTLFLALMMFAVFTFEESVSNYSDWVTFMENLDQYDKEKLDSFGAEQKVKKVSLHPSLYFDAE
DVHVLRQKAHTSHSHIFRTIRSAVMVMLSNPMYYLPPPKYVDFAAKWNEVYGNNLPPLAFYCLLCPEDKA
ALDFTVEYMDRMAAYKNWLVESAPGDEVPLGHSLTGFATAYDFLYNSLENVRRQKYLEKIRSASKEMFEY
SKVRSWGKQLLHNHQATNMLALLTGALVTGVDDGSQANIWKHAVVDVMEKTMFLLNHIVDGSLDEGVAYG
SYTAKSITQYVFLAQRHFGINNLENNWLKMHFWFYYATLLPGFQRTVGVADSNYNWFYGPESQLVFLDKF
VLKNGAGNWLAQQIRKHRPKDGPMVPSTAQRWSTLHTEFIWYSAEITPQPPPDYGTAKMHVFPNWGVVTY
GAGLPSSQTNTFVSFKSGKLGGRAVYDIVHFQPYAWIDGWRSFNPGHEHPDQNSFTFAPNGQVFVSEALY
GPKLSHLNNVLVFAPSPTSQCNQPWEGQLGECAQWLKWIGHEVGDSSGEIITASQSGDMMFVSGEAVSAY
TSAMKLKSVYRILLLLNSQTLLVVDHIEKEADSPVNSVSAFFHNLDIDFKYIPYKFKNKYNGAMMDVWDA
HYKMFWFDHHGSSPVARIQEAEQAAEFKKRWTQFVNVTFPMKSTLTRIVYLFYGPYVNVSNCRLIDNVKS
GFQISLSVNSTENTVSVVTDHQNLKARFDYLGFGGFAKVVHENKVTKFGLGTESVEKLIKNNRVVLPFGF
KVNIIAGLILGVSLVILAFQWRFYVSFSKMLRWILILVITLWLTELVDVWSMCTQPICAKWSSDLTRLEH
DEGNKDKRLEGTSIVFPDVIITSLPASGAEILKQLFFNSSDFLYMRIPTAYLEIPESEFEIDSFVDPCEW
KASDVQNGHFHLLKGWLQSLVRDTKLHLQNIQLYEASRSKITQHSAINKDKKKRSKKRESLLEQRSRARA
SQEKDAEYIRELRRHLVYYPSARTVLSLSSGSWTLKLPFFQEILGPSMRALYVVRDPRAWIYSMLYKNKP
SLYSLKKVPQRLAAMFKWENGKGKCSVNEGYAFEYESLRKEFSNSNSNAVSVLSHLWLANTAAALRINGD
LLPTNYLMVKFEDIVSFPQKTAETIFAFLGIPLPPASLNQILFATSTSLFYLPYEGEISPSSIHAWKQNM
PKKEIRLIEDTCFSLMEHLGYPKFVE
>8839
MALMLTGHTLFLSLMMFAVFTFEESVNNYSDWVTFMENVGQYEKQQKLEGLGAEQKLKKTVLHPNLYFDA
EDVHALRQKAHTSHSHLFRAIRSAVIVMLSNPLYYLPPPKHVDFAAKWNEVYGNNLPPLAFYCLLCPEDK
AAFDFALEYMDRMAGYKNWLVESAPGDEVPLGHSLTGFATAYDFLYNSLENVRRQKYLEKIRSASEEMYE
YSKVRSWGKQLLHNHQATNMLALLTGALVTGVDDGSQANVWKHTVVDVMEKTMFLLNHIVDGSLDEGVAY
GSYTAKSITQYVFLAQRHFGINNLENNWLKMHFWFYYSTLLPGFQRTVGIADSNYNWFYGPESQLVFLDK
FIMKNGAGNWLAQQIRKHRPKDGPMVPSTAQRWSTLHTEFIWYAAEITPQPPPDYGTAKLHVFPNWGVVT
YGAGLPSSQTNTFVSFKSGKLGGRAVYDIVHFQPYAWIDGWRSFNPGHEHPDQNSFTFAPNGQVFVSEAL
YGPKLSHLNNVLVFAPSPTSQCNQPWEGQLGECAQWLKWIGHEVGDSTGEIITASQSGDMMFVSGEAVSA
YTSAMKLKSVYRILLLLNSQTLLVVDHIEKEEDSPVNSVSAFFHNLDIDFKYIPYKFKNKYNGAMMDVWD
AHYKMFWFDHHGSSPVARIQEAEQAAEFKKRWTQFVNVTFPMKSTLARIVYLFYGPYVNVSNCRLIDNAK
SGFQISLSVNNTENTVFVVTEHQNLKTRFDYLGFGGFAKVVHENKVTKFGLGTESVEKRIKNNRVVFPFG
FKVNIIAGLILAVSLVILAFQWQFYISFSKMLRWILILVITLWLIELVDVWSMCTQPICAKWSSDLTRLE
HDKGNKAKQLEGNPVVLPDVIITSLPASGAEILKQVFFNSSDFLYMRIPTAYLEIPESEFEIDSFVDPCE
WKASDVHNGHFRLLKGWLQSLVRDTKLHLQNIHLYEASRSKITQHSAISKDKKKKSKKRESLSEQRIRAR
ASQDKDAEYIRELRRHLVSYPSARPVLSLSSGSWTLKLPFFQEILGPSMRALYVVRDPRAWVYSMLYKNK
PSLYSLKKVPQHLAAMFKWENHKGKCSLSEGYAFEYESLRKELSKSNSNAVSVLSYLWLANTAAALRING
DLLPTNYQMVKFEDIVSFPQKMAETIFAFLGMPLSPASLNQILFATSTSLFYLPYEGEISPSSIHAWKQN
MPKEEIRLIEDICFSLMDHLGYPKFVE
>59894
MALMFMGHTLFLALMVFDVFTFEESVSNYSDWVTFIENVDQYEKQQLEGLSAEQQLKRTVLHPSLYFDAR
DVQALRQKARTSHLHLFRAIRSAVMVMLSNPLYYLPPPKHIDFAAKWNEIYGNNLPPLAFYCLLCPEDKA
AFDFALEYMDRMAGYKNWLVENAPGDEVPLGHSLTGFATAFDFLYNSLENERRQKYLEKIRSVSEEMYEY
SKVRSWGKQLLHNHQATNMLALLIGALVAGVDKGSQANIWKHTVVDVMEKTMFLLNHIVDGSLDEGVAYG
SYTAKSVTQYVFLAQRHFGINNLENNWLKMHFWFYYATLLPGFQRTVGVADSNYNWFYGPESQLVFLDKF
IMKNGAGNWLAQQIRKHRPKDGPMVPSTAQRWSTLHTEFIWYAAEITPQPPPDYGTAKMHVFPNWGVVTY
GAGLPNSQTNTFVSFKSGKLGGRAVYDIVHFQPYRWIDGWRSFNPGHEHPDQNSFTFAPNGQVFVSEALY
GPKLSHLNNVLVFAPSPTSQCNQPWEGQLGECTQWLKWIGDEVGDSTGEIITASQAGDMMFVSGEAVSAY
TSAMKLKSVYRVLLLLNSQTLLVVDHIEKEEDSPVNSVSAFFHNLDIDFKYIPYKFKNKYNGAMMDVWDA
HYKMFWFDHRGSSPVARIQEAEQAAEFKKRWTQFVNVTFPMKNTLTRIVYLFYGPYVNVSNCRLMDNAKS
GFQISLSVNNTENTISVVTEYQNLKARFDYLGFGGFAKVVHENKVTKFGLGTESVKKDMKNNRVVFPFGF
KVNIIAGLILGVSLVILAFQWRFYISFGKMLRWILILVVTLWLIELVDVWSMCTQPICAKWSSDMTRPER
DKGNKAKQLEENPVVFPDVIITSLPASGAEILKQLFYNTSDFLYIRIPTPYLEIPETEFEIDSFVDPCEW
KVSDVQNGNFRLMQGWLQSLVRDTKLHLQNIDLYEASRNKIAQHAALSKEKKKRSKKRESLSEQKSRARG
SQEKDAEYIRELRRHLIYYPNARPVLSLSSGSWTLKLPFFQEILGPSMRALYVVRDPRAWVYSMLYKNKP
SLYSLKNIPQRLAAMFKGENGKEKCRLNEGYAFEFESLRKEISNSNSNAISVLSYLWLANTAAAMRINRD
LLPTNYQLVKFEDIVSFPQKTAETIFAFLGMPLPPASLNQILFATSTSLFYLPYEGEISPSSIHAWKQNM
PHEEIRQIEDICCSLMDHLGYPKFVK
>13146
MALMFTGHALFLALMMFAVLTFEESVSNYSDWVTFVENIDQYEKQQREGLRAEQKPKKAVLHPSLYFDAE
DVQALRQKAHTSHSHLFRAIRSAVIAMLSNPLYYLPPPKHADFAAKWNEIYGNNLPPLAFYCLLCPEDKA
AFDFALEYMDRMAGYKNWLVENAPGDEVPLGHSLTGFATAFDFLYNSLENERRQKYLEKIWSISKEMYEY
SKVRSWGKQLLHNHQATNMLALLIGALVAGVDRGSQANIWKHAVVDVMEKTMFLLNHVVDGSLDEGVAYG
SYTAKSVTQYVFLAQRHFGINNLENNWLKMHFWFYYATLLPGFQRTVGVADSNYNWFYGPESQLVFLDKF
VLKNGAGNWLAQQIRKHRPKDGPMVPSTAQRWSTLHTEFIWYAAEITPQPPPGYGNAKMHVFPNWGVVTY
GAGLPNSQANTFVSFKSGKLGGRAVYDIVHFQPYPWIDGWRSFNPGHEHPDQNSFTFAPNGQVFVSEALY
GPKLSHLNNVLVFAPSPTSQCNQPWEGQLGECAQWLKWIGDEVGDSTGEIITASQVGDMMFVSGEAVFAY
TSAMKLKSVYRVLLLLNSQTLLVVDNIEKEEDSPVNSVSAFFHNLDIDFKYIPYKFKNRYNGAMMDVWDA
HYKMFWFDHHGSSPVARIQEAEQAAEFKKRWTQFVNVTFPMKNTLTRIVYLFYGPYVNVSNCRLTDNAKS
GFQISLSVNNTENTISVVTEYQNLKTRFDYLGFGGFAKVVNENKVTKFGLGTESVKKQIKNNRAVFPFGF
KVNIIAGLILGVSLVILAFQWRFYISFGKMLRWILILVVTLWLIELVDVWSMCTQPICAKWTSGITKLEH
DEGNKAKQLEGNPVVLPDVIITSLPASGAEILKQLFFNSSDFLYIRIPTPYLEIPETEFEIDSFVDPCEW
KVSDVQNGHFRLIQGWLQSLVRGTKLHLQNIHLYETSRSKIAQHFAINKDKKKRSKKRESLSEQRIRARG
NQDKDAEYIRELRRHLSYYPNARPVLSLSSGSWTLKLPFFQEIIGPSMRALYVVRDPRAWIYSMLYKNKP
NLYSLKNVPQHLAAMFKGENGKRKCSLNEGYAFEYESLRKELSNSNSNAVSVLSYLWLANTAAALRINGV
LLPTNYQLVKFEDIVSFPQKTAETIFAFLGIPLPPARLNQILFATSTNLFYLPYEGEISSSSIHSWKQNM
PNEEIRRIEDICYSLMVHLGYPKFIE
>8954
MALMFTGHTLFLALTMFAVFTFEESVSNYSDWVTFVENVDQYEKQQLEGLSAEQKLKKTVLHPSLYFSAE
DVEALRQKAHTSHLHLFRAIRSAVMVMLSNPLYYLPPPKHVDFAAKWNEIYGNNLPPLAFYCLLCPEDKA
AFDFALEYMDRMAGYKNWLVENAPGDEVPLGHSLTGFATAFDFLYNSLEDERRQKYLEKIWSVSEEMYEY
SKVRSWGKQLLHNHQATNMLALLIGALVAGVDRGSQANIWKHTVVDVMEKTMFLLNHIVDGTLDEGVAYG
SYTAKSVTQYVFLAQRHFGINNLENNWLKMHFWFYYATLLPGFQRTVGIADSNYNWFYGPESQLVFLDKF
IMKNGAGNWLAQQIRKHRPKDGPMVPSTAQRWSTLHTEFIWYTAEITPQPPPDYGMAKMHVFPNWGVVTY
GAGLPNSQTNTFVSFKSGKLGGRAVYDIVHFQPYSWIDGWRSFNPGHEHPDQNSFTFAPNGQVFVSEALY
GPKLSHLNNVLVFSPSPTSQCNQPWEGQLGECAQWLKWIGGEVGDSTGEIITASQAGDMMFVSGEAVSAY
TSAMKLKSVYRILLLLNSQTLLVVDHIEKEEDSPVNSVSAFFHNLDIDFKYIPYKFKNRYNGAMMDVWDA
HYKMFWFDHHGSSPVARIQEAEQAAEFKKRWTQFVNVTFPMKNTLTRIAYLFYGPYVNVSDCRLIDNAKY
GFQISLSVNNTENTISVVTEYQNLKTRFDYLGFGGFAKVVHENKVTKFGLGTESMKKQIKNSRVAFPFGF
KVSIIAGLILGVSLVILGFQWRFYVSFGKMLRWILILVVTLWLIELVDVWSMCTQPICAKWSSDMTRLEH
DKGNKAKQLEGNPDVLPDVIITSLPASGAEILKQLFFNSSDFLYIRIPTPYLEIPETEFEIDSFVDPCEW
KVSDVQNGHFHRIQGWLQSLVQDTKLHLQNIHLYEASKSKIAQHSATSKDKKKRTKKRESLSEQRSRTRG
SQDKDAEYIRELRRHLIYYPNARPVLSLSSGSWTLKLPFFQEILGLSMRALYVVRDPRAWIYSMLYKNKP
SLYSLKNVPQHLAAMFKGQNGKGKCSLNEGYAFEYESLRKELSNSNSNAVSVLSYLWLANTAAALRINGD
LLPTNYHLVKFEDIVSFPQKTAETIFAFLGIPLPPASLNQILFATSTSLFYLPYEGEISPSSIHAWKQNM
PNEEIRQIEDICCSLMDHLGYPKFIE
>34839
MALMFTGHFLFLTLAMFGFSTLEESVSNYSEWAVFTDDVDQFKTEKVQDVRPKQKLRRSMLHPSLYFDAG
EIQAMRQKSRTSHSHLFRAIRSAVTVMLSNPTYYLPPPKHADFAAKWNEIYGNNLPPLALYCLLCPEDKV
AFEFVLEYMDRMVGYKDWLVENAPGDEVPVGHSLTGFATAFDFLYNLLDNHRRQRYLEKIWVVTEEMYEY
SKVRSWGKQLLHNHQATNMIALLTGALVTGVEKGSKANIWKQVVVDVMEKTMFLLNHVVDGSLDEGVAYG
SYTAKSVTQYVFLAQRHFNINNLDNNWLRMHFWFYYATLLPGFQRTVGIADSNYNWFYGPESQLVFLDKF
ILKNGAGNWLAQQIRKHRPKDGPMVPSTAQRWSTLHTEYIWYDPQLTPQPPAGYGTAKMHMFPNWGVVTY
GAGLPNTQTNTFVSFKSGKLGGRAVYDIVHFQPYSWIDGWRSFNPGHEHPDQNSFTFAPNGQVFVSEALY
GPKLSHLNNVLVFAPSPSSQCNKPWEGQLGECAQWLRWTGEEVGDAAGEIITASQHGEMVFVSGEAVSAY
SSAMRLKSVYRALLLLNSQTLLVIDHIERQEISPINSVSAFFHNLDIDFKYIPYRFMNRYSGAMMDVWDA
HYKMFWFDHRGNSPVGSIQEAEQAAEFKKRWTQFVNVTFQMDSTITRIAYIFYGPYVNVSSCRFTDSSTT
GLQISLNVNNTEHVVSVVTDYHNLNIRFRYLGFGGFASVADQSQITRFGLGTEAIVKPVRHDRVIFPFGF
KFNVVVGLILCISLVILTFQWRFYLSFRKLMRWILIFVIALWFIELLDVWSTCTQPICATWTKKETEASK
RMVSSEGHYVDLPDVVITSLPGSGAEILKQLFFNSTDFLYIRVPTAYIDIPKTEFEINSFVDACEWKVTD
IHSGHFRLLRGWLQSLVQDTKIHLQNIHLREPSRGKLAQYFAMSKDKKRKLKRRESLLEQRSRMKSSFDR
DAEYIRALRRHLTYYPSARPVLSLSSGSWTLKLPFFQEVLGTSMRALYIVRDPRAWIYSMLYSSKPSLYT
LKNVPEHLAKLFKIEGGKGKCGLNSDYAFEYEPLRKELARSQSNAVSLLSHLWLANTAAALRINMNLLPT
SYQLIKFEDIVHFPQKTTERIFAFLGIPLSPASLNQILFATSTNLFYLPYEGEISPTNANVWKQNLPRDE
IKLIENICWTLMDHLGYPKFTD
>44394
MALMFTGHTLFLALMVFDVFTFEESVSNYSDWVTFIENVDQYEKQQLEGLSAEQNLKRTVLHPSLYFDPQ
DVQALRQKARTSHLHLFRAIRSAVMVMLSNPLYYLPPPKHIDFAAKWNEIYGNNLPPLAFYCLLCPEDKA
AFDFALEYMDRMAGYKNWLVENAPGDEVPLGHSLTGFATAFDFLYNSLENERRQKYLEKIWSVSEEMYEY
SKVRSWGKQLLHNHQATNMLALLIGALVAGVDKGSQANIWKHTVVDVMEKTMFLLNHIVDGSLDEGVAYG
SYTAKSVTQYVFLAQRHFGINNLENNWLKMHFWFYYATLLPGFQRTVGVADSNYNWFYGPESQLVFLDKF
IMKNGAGNWLAQQIRKHRPKDGPMVPSTAQRWSTLHTEFIWYAAEITPQPPPGYGTAKMHVFPNWGVVTY
GAGLPNSQTNTFVSFKSGKLGGRAVYDIVHFQPYRWIDGWRSFNPGHEHPDQNSFTFAPNGQVFVSEALY
GPKLSHLNNVLVFAPSPTSQCNQPWEGQLGECAQWLKWIGDEVGDSTGEIITASQAGDMMFVSGEAVSAY
TSAMKLKSVYRVLLLLNSQTLLVVDHIEKEEDSPVDSVSAFFHNLDIDFKYIPYKFKNKYNGAMMDVWDA
HYKMFWFDHRGSSPVARIQEAEQAAEFKKRWTQFVNVTFPMKNMLTRIVYLFYGPYVNVSNCRLMDNAKS
GFQISLSVNNTENTISVVTEYQNLKARFDYLGFGGFAKVVHGNKVTKFGLGTESVKKDIKNSRVVFPFGF
KVNIIAGLILGVSLVILAFQWRFYISFGRMLRWILILVVTLWLIELVDVWSMCTQPICAKWSTDVTRLER
DKGNKAKQLEGNPVVLPDVIITSLPTSGAEILKQLFFNTSDFLYIRIPTPYLEIPETEFEIDSFVDPCEW
KVSDVPNGNFRLIQGWLQSLVQDTKLHLQNIHLYETSRSKIAQHSALSKDKKKRSKKRESLLEQRSRARG
SQEKDAEYIRELRRHLVYYPNARPVLSLTSGSWTLKLPFFQEILGPSMRALYVVRDPRAWVYSMLYKNKP
SLYSLKNIPQRLAAMFKGENGKGKCSLNEGYASEFESLRKEISNSNSNAISVLSYLWLANTAAAMRINRD
LLPINYQLVKFEDIVSFPQKTAEKIFAFLGIPLPPASLNQILFATSTSLFYLPYEGEISPSSIHAWKQNM
PHEEIRQIEDICCSLMDHLGYPKFIE
>48883
MALMFTGHTLFLALMVFDVFTFKESVSNYSDWVTFMENVDQYEKQQLEGLSAEQKLKRTVLHPSLYFDPQ
DVQALRQKARTSHLHLFRAIRSAVMVMLSNPLYYLPPPKHIDFAAKWNEIYGNNLPPLAFYCLLCPEDKA
AFDFALEYMDRMAGYKNWLVENAPGDEVPLGHSLTGFATAFDFLYNSLEHERRQKYLEKIWSVSEEMYEY
SKVRSWGKQLLHNHQATNMLALLIGALVAGVDKGSQANIWKHTVVDVMEKTMFLLNHIVDGSLDEGVAYG
SYTAKSVTQYVFLAQRHFGINNLENNWLKMHFWFYYATLLPGFQRTVGVADSNYNWFYGPESQLVFLDKF
IMRNGAGNWLAQQIRKHRPKDGPMVPSTAQRWSTLHTEFIWYAAEITPQPPPDYGTAKMHVFPNWGVVTY
GAGLPNSQTNTFVSFKSGKLGGRAVYDIVHFQPYRWIDGWRSFNPGHEHPDQNSFTFAPNGQVFVSEALY
GPKLSHLNNVLVFAPSPTSQCNQPWEGQLGECAQWLKWIGDEVGDSTGEIITASQAGDMMFVSGEAVSAY
TSAMKLKSVYRVLLLLNSQTLLVVDHIEKEEDSPVNSVSAFFHNLDIDFKYIPYKFKNKYNGAMMDVWDA
HYKMFWFDHRGSSPVARIQEAEQAAEFKKRWTQFVNVTFPMKNTLTRIVYLFYGPYVNVSSCRLMDNAKS
GFQISLSVNNTENTISVVTEYQNLKARFDYLGFGGFAKVVHENKVIKFGLGTESVKKDTKNNRVVFPFGF
KVNIIAGLILSISLVILAFQWRFYISFGKMLRWILILVVTLWLIELVDVWSMCTQPICAKWGTDMTRLER
DKGNKAKQLEGNPVVLPDVIITSLPTSGAEILKQLFFNTSDFLYIRIPTPYLEIPETEFEIDSFVDPCEW
KVSDVQNGNFRLIQGWLQSLVQDTKLHLQNIHLYEASRSKIAQHSALSKDKKKRSKKRESLLEQRSRARG
SQEKDAEYIRELRRHLVYYPNARPVLSLTSGSWTLKLPFFQEILGPSMRALYVVRDPRAWIYSMLYKNKP
SFYSLKNIPQRLAAMFKGENGKGKCSLNEGYASEFESLRKEISNSNSNAISVLSYLWLANTAAAMRINRD
LLPRNYQLVKFEDIVSFPQKTAETIFAFLGIPLPPASLNQILFATSTSLFYLPYEGEISPSSIHAWKQNM
PHEEIRQIEDICCSLMDHLGYPKFIE
>8932
MALMFTGHTLFLALMMFAGFTFEESVSNYSDWVTFIENVDQYEKQQLEGLSAEQKLKKVVLHPSLYFDAE
DVQALRQKAHTSHLHLFRAIRSAVMVMLSNPLYYLPPPKHVDFAAKWNEIYGNNLPPLAFYCLLCPEDKA
ALDFALEYMDRMAGYKNWLVENAPGDEVPLGHSLTGFATAFDFLYNSLENERRQKYLEKIWSVSEEMYEY
SKVRSWGKQLLHNHQATNMLALLVGALVAGVDKGSQANIWKHTVVDVMEKTMFLLNHIVDGSLDEGVAYG
SYTAKSITQYVFLAQRHFGINNLENNWLKMHFWFYYATLLPGFQRTVGVADSNYNWFYGPESQLVFLDKF
IMKNGAGNWLAQQIRKHRPKDGPMVPSTAQRWSTLHTEFIWYAAEITPQPPPDYSTAKMHVFPNWGVVTY
GAGLANSQTNTFVSFKSGKLGGRAVYDIVHFQPYAWIDGWRSFNPGHEHPDQNSFTFAPNGQVFVSEALY
GPKLSHLNNVLVFAPSPTSQCNQPWEGQLGECAQWLKWIGDEVGDSTGEIITASQAGDMMFVSGEAVSAY
TSAMKLKSVYRVLLLLNSQTLLVVDHIEKEEDSPVNSVSAFFHNLDIDFKYIPYKFKNKYNGAMMDVWDA
HYKMFWFDHHGSSPVARIQEAEQAAEFKKRWTQFVNVTFPMKNTLTRIVYLFHGPYVNVSNCRLIDNAKS
GFQISLSVNNTENTISVVTEYQDLKTRFDYLGFGGFAKVVHENKVTKFGLGTESVEKRIKNNRVVFPFGF
KVNIVAGLILGVSLVILAFQWQFYISFSKMLRWILILVVTLWLIELVDVWSMCTQPICAKWSSDMTRLEH
DEGNKARQLEGNPVLLPDVIITSLPASGAEILKQLFFNSSDFLYVRIPAPYLEIPETEFEIDSFVDPCEW
KVSDVQNGHFRLIQGWLQSLVRGTKLHLQNIHLYEASRSKIAQHSATSKDKKKRSKKRESLSEQRSRARG
SKEKDAEYIRELRRHLIYYPNARPVLSLSSGSWTLKLPFFQEILGPSMRALYVVRDPRAWIYSMLYKNKP
SLYSLKNIPQHLTAMFKGEDGKGKCSLNEGYAFEYESLRKELSNSDSNAVSVLSYLWLANTAAALRINAD
LQATNYHLVKFEDIVNFPQKTAETIFAFLGIPLPPASLNQILFATSTSLFYLPYEGEISPSSIHAWKQNM
PNEEIKRIEDICCSLMDHLGYQKFIE
>9541
MPKGGAPPWIMALMFTGHLLFLVLLMFALSTFEESVSNYSEWAVFADDIDQFKTQKVQDFRPNQKLKKSM
LHPSLYFDAGEIQAMRQKSRTSHLHLFRAIRSAVTVMLSNPTYYLPPPKHADFAAKWNEIYGNNLPPLAL
YCLLCPEDKVAFEFVLEYMDRMVGYKDWLVENAPGDEVPIGHSLTGFATAFDFLCNLLDNHRRQKYLEKI
WVITEEMYEYSKVRSWGKQLLHNHQATNMIALLTGALVTGVDKGSKANIWKQAVVDVMEKTMFLLNHIVD
GSLDEGVAYGSYTAKSITQYVFLAQRHFNINNLDNNWLKMHFWFYYATLLPGFQRTVGIADSNYNWFYGP
ESQLVFLDKFILKNGAGNWLAQQIRKHRPKDGPMVPSTAQRWSTLHTEYIWYDPQLTPQPPAEYGTAKIH
TFPNWGVVTYGAGLPNTQTNTFVSFKSGKLGGRAVYDIVHFQPYSWIDGWRSFNPGHEHPDQNSFTFAPN
GQVFVSEALYGPKLSHLNNVLVFAPSPSSQCNKPWEGQLGECAQWLKWTGEEVGDAAGEIITASQHGEMI
FVSGEAVSAYSSAMRLKSVYRALLLLNSQTLLVVDHIERQEDSPINSVSAFFHNLDIDFKYIPYKFMNRY
NGAMMDVWDAHYKMFWFDHHGNSPMASIQEAEQAAEFKKRWTQFVNVTFQMESTITRIAYVFYGPYINVS
SCRFIESSDSGLQISLNVNNTEHVVSIVTDYHNLKTRFNYLGFGGFASVADQGQITRFGVGTQAIVKPVR
HDRIIFPFGFKFNIAVGLILCISLVILTFQWRFYLSFRKLMRWILILVIALWFIELLDVWSTCSQPICAK
WTRTEAEGSKKSLSSEGHHVDLPDVVITSLPGSGAEILKQLFFNSSDFLYIRVPTAYIDIPETEFEIDSF
VDACEWKVSDIRSGHFRLLRGWLQSLVQDTKLHLQNIHLHEPNRGKLAQYIAMNKDKKRKFKRRESLPEQ
RSQMKGAFDRDAEYIRALRRHLVYYPSARPVLSLSSGSWTLKLHFFQEVLGASMRALYIVRDPRAWIYSM
LYNSKPSLYSLKNVPEHLAKLFKIEGGKGKCNLNSGYAFEYEPLRKELSKSKSNAVSLLSHLWLANTAAA
LRINTDLLPTSYQLVKFEDLVHFPQKTTERIFAFLGIPLSPASLNQILFATSTNLFYLPYEGEISPTNTN
VWKQNLPRDEIKLIENICWTLMDRLGYPKFMD
>303518
MCSQIPGKMAGSWVVYSAFLLPLFAVGTAFSGVFNTTDRDVFTDDLLQVKLTQDRASEHWKLQSADSHPN
LYFNQVDVLHLRQRSSTTHSHIFKVIRAAVLTMLSNVPFYLPPVKHEEFTSKWNEIYGNNLPPLALYCLL
CPEDSAALQFLIKFMDRMAEYSDWKVTSAPNDEVPMAHSLTGFATAYDFIYSYLDQRRKDLYLKKIRAET
VELYELSKYRGWGKQYLQNHQTTNILAVLTGAIVVGSHDDPESMIWKQVAVNYMEKTMFLLNHVVDGSLD
EGVAYGSYTAKSITQYVFLAQRHFNIDNMQNNWLRGHFWFYYATLLPGFQRTVGIADSNYNWFYGPESQL
VFLDTFIMKNGTGNWLAQQIRKHRPKDGPMGQSSAQRWATLHTEYIWYNSHLTPQPPHDFGKAKMHIFSN
WGVVTYGAGLPNGQSNTFVSFKSGSLGGRAVYDIVHDKPYSWVDGWNSFNPGHEHPDQNSFTFAPNGQVF
VSEALYGPKYSYLNNVLVFSPSPTSQCNNPWEGQLGECAKWLRWTDEGVGDARGEVIAASSHKDTMFVSG
EAALAYSPAMRLKSVFRALVLLNSQTLLVLDHVEKWGDSPIKSLSAFFHNLDIDFKYVPFRFMDRYNGAM
MDVWDAHYKMFWFDTQGHSPETRIQEAEQAAEFKKRWTQYINVTFQMTGPVSRVAYVLHGPYVKVSNCRF
IDNSKNGVRLSLIINNTEKIVSIATNYKDIGARLSYLGFGGHSKVEDRYQITRYGLGTQILPKQISSDNQ
LFDFGFTVNVIAGVVLCVAIGFLTMQRKFYVCFSRLMRYALLTVLILWIAELLFVSNSCDQLLCGVKWKG
AGAKSEVNKQIRLYEQHRLPLPTVVITTLPGSGSEILKHLFYNSSDFVYIRVPTEHVDIPETEFEFDTLV
DACEWSRSDAVNARFKIIQGWLHSLVHNTKLHLQNIQLVEGSRVKQTQRVSVPRDRKKRSRKREPASDLK
GKLRASLDRDAEYVREMRRHVAEYPNARVVINMQSGSWTLKLPFIQEVVGLSLRTIYLVRDPRAWIYLMV
YNSKPSLYSLKNIPQHLSLIFKEDAVRDGCSAVAPEFKMIQRLLSRYETNPVLILAHLWLAHTAAALRVS
ESLPEESFLRVRFEDVVNFPQETAETIHTFLGVPVSPTALNQLIFTTSTNLYNLMYEGDISPANINIWRQ
KMSRKDVRLIEDVCGSVMKRLGYTRFTS
>8083
MAYMWVAHLLFLLPLLRVGTAFSGVFNTTDRDLFTDDSPQVKLEQWKLHSADSHPNLYFNQADVLHLRQR
SSTTHSYIFKVIRAAVLTMLSNAPSYIPPAKHEEFTSKWNEIYGNNLPPLALYCLLCPEDSAALQFLLKF
MDRMANYPDWKVTSAPNDEVPTAHSLTGFATAYDFIYSFLDDSRRDAYLKKIRSETEALYELSKYRAWGK
QYLQNHQTTNILAILTGAIVVGSHNDPESMIWKQVSVNYMEKTMFLLNHIVDGSLDEGVAYGSYTAKSIM
QYVFLAQRHFNIDNMQNNWLRGHFWFYYATLLPGFQRTVGIADSNYNWFYGPESQLAFLDTFVMKNGTGN
WLAQQIRKHRPKDGPMGQSSAQRWATLHTEYIWYNSHLTPQPPHDFGKARMHIFSNWGVVTYGAGLPAGQ
SNTFVSFKSGRLGGRAVYDIVHDKPYSWIDGWNSFNPGHEHPDQNSFTFAPNGQVFVSEALYGPKYSYLN
NVLVFSPSPTSQCNSPWEGQLGECAKWLRWTDEGVGDARGEVIVASEHRDTMFVSGEAVSAYSAAMRLKS
VFRALVLLNSQTLLVLDHVEKWADSPVKSLSAFFHNLDIDFKYVPFRFMDKYNGAMMDVWDAHYKMFWFD
SQGHSPETRIQEAEQAAEFKKRWTQYVNVTFPMTGAVSRVAYVLHGPYVKVSNCRFIDNSKNGVRLSLTI
NNTEKIVSIVTNYKDIGARLAYIGFGGHCKVEDRYQITRYGLGTQHIPKQISNDNQLFDIGFTLNVIAGV
VLCVAIGFLTMQRKFYVCFSRLMRYALLSVLLLWIVELLFVSNSCDQLLCGVKWKSADTKSAVSKQIRLY
EQHRLPLPTVVITALPGSGSEILKHLFYNNSDFVYIRVPTEHVDIPETEFEFDSLVDTCEWSRTDAVHGR
FKIIQSWLHSLVHNTKLHLQNIQLAEGSRVKQPQRASPSKDRKKRSRRREPASELKGRLRASLDRDAEYV
REMRRHVAEYPNAQVVLNMRSGSWTLKLPFIQEVVGVSLRAVYLVRDPRAWIYLMVYNSKPSLYSLKNIP
QHLSLIFKEDSVRGGCPAIAPEFKTIQWLLSRSETNPILILAHLWLAHTAAALRVAESLPEDSYLRVRFE
DVVSFPQETAETIHTFLGVPMSPAALNQLTFTTSTNLYNLMYEGDISPANINVWRQKMPRKDVRLIEDIC
GGVMKRLGYARSAS
>8153
MCSQTPGKMAGSWVVYSAFLLPLFAVGTAFSGVFNTTDRDVFTDDLLQVKLTQDRASEHWKLQSADSHPN
LYFNQVDVLHLRQRSSTTHSHIFKVIRAAVLTMLSNVPFYLPPVKHEEFTSKWNEIYGNNLPPLALYCLL
CPEDSAALQFLIKFMDRMAEYSDWKVTSAPNDEVPMAHSLTGFATAYDFIYSYLDQHRKDLYLKKIRAET
VELYELSKYRGWGKQYLQNHQTTNILAILTGAIVVGSHDDPESMIWKQVAVNYMEKTMFLLNHVVDGSLD
EGVAYGSYTAKSISQYVFLAQRHFNIDNMQNNWLRGHFWFYYATLLPGFQRTVGIADSNYNWFYGPESQL
VFLDTFIMKNGTGNWLAQQIRKHRPKDGPMGQSSAQRWATLHTEYIWYNSHLTPQPPHDFGKAKMHIFSN
WGVVTYGAGLPNGQSNTFVSFKSGSLGGRAVYDIVHDKPYSWVDGWNSFNPGHEHPDQNSFTFAPNGQVF
VSEALYGPKYSYLNNVLVFSPSPTSQCNNPWEGQLGECAKWLRWTDEGVGDARGEVIAASSHKDTMFVSG
EAALAYSPAMRLKSVFRALVLLNSQTLLVLDHVEKWGDSPIKSLSAFFHNLDIDFKYVPFRFMDRYNGAM
MDVWDAHYKMFWFDTQGHSPETRIQEAEQAAEFKKRWTQYINVTFQMTGPVSRVAYVLHGPYVKVSNCRF
IDNSKNGVRLSLIINNTEKIVSIATNYKDIGARLSYLGFGGHSKVEDRYQITRYGLGTQILPKQISSDNQ
LFDFGFTVNVIAGVVLCVAIGFLTMQRKFYVCFSRLMRYALLTVLILWIAELLFVSNSCDQLLCGVKWKG
AGAKSEVNKQIRLYEQHRLPLPTVVITTLPGSGSEILKHLFYNSSDFVYIRVPTEHVDIPETEFEFDTLV
DACEWSRSDAVNARFKIIQGWLHSLVHNTKLHLQNIQLVEGSRVKQTQRVSVPRDRKKRSRKREPASDLK
GKLRASLDRDAEYVREMRRHVAEYPNARVVINMQSGSWTLKLPFIQEVVGLSLRTIYLVRDPRAWIYLMV
YNSKPSLYSLKNIPQHLSLIFKEDAVRDGCSAVAPEFKMIQRLLSRYETNPVLILAHLWLAHTAAALRVS
ESLPEESFLRVRFEDVVNFPQETAETIHTFLGVPVSPTALNQLIFTTSTNLYNLMYEGDISPANINIWRQ
KMSRKDVRLIEDVCGSVMKRLGYTRFAS
>72004
MALMFTGHCLFLVLVMFAFSTLEESVSNYSDWAVFPDDIDPFKTQRVQDVRPNQKPKKSMLHPRLYFDAG
EIQAMRQKSRTTHLHLFRAIRSAVTAMLSNPTYYLPPPKHADFAAKWNEIYGNNLPPLALYCLLCPEDKV
AFEFALEYMDRMVGYKDWLVENAPGDEVPVGHSLTGFATAFDFLYNLLDGRRRQKYLEKIWVITEEMYEY
SKVRSWGKQLLHNHQATNMIALLTGALVTGVDKGTKVNLWKQVVVDVMEKTMFLLNHIVDGSLDEGVAYG
SYTAKSVTQYVFLAQRHFNINNLDNNWLKMHFWFYYATLLPGFQRTVGIADSNYNWFYGPESQLVFLDKF
VLKNGAGNWLAQQIRRHRPKDGPMVPSTAQRWSTLHTEYIWYDPQLTPQPPAEYGTAKMHMFPNWGVVTY
GAGLPNTQTNTFVSFKSGKLGGRAVYDIVHFQPYSWIDGWRSFNPGHEHPDQNSFTFAPNGQVFVSEALY
GPKLSHLNNVLVFAPSPTSQCNKPWEGQLGECAQWLKWTGEEVGDAAGEIITASQHGDMIFVSGEAVSAY
SSAMKLKSVYRALLLLNSQTLLVVDHVEKQEDSPIKSVSAFFHNLDIDFKYIPYRFMNRYNGALMDVWDA
HYKMFWFDHRGSSPLASIQEAEQAAEFKKRWTQFVNVTFQMESAITRIAYVFYGPYVNVSSCRFIDNSNS
GLQLSLNVNNTDHVVSIVTDYQNLKTRFDYLGFGGFATVADQAQVTRFGLGTEAIVKPIRRDRVIFPFGF
KFNVAVGLILCIGLVILTFQWRFYLSFRKLMRWILILVIALWSVELLDVWSACTQPICAKWARPETEASG
QAPAPGGQRTDPPDVVITSLPGSGAEILKQLFFNSSDFLYIRVPTAYIDIPETELEIDSFVDACEWTASE
VHGVRFRLLRGWLQSLVRDTKLHLQNIHLHEPSRGKLAQYFSMNKDKKRKLKRRESLAEQRSRMKGAFDR
DAEYVRALRRHLVHYPSARPVLSLGSGSWTLKLHFFHEVLGASMRALYVVRDPRAWVYSMLYSSKPSLYS
LKNVQEHLAKLFKTEGSAGRCTLNSGYAVEYELLRKELLASRPHPVSLLAHAWLANTAAALRLNADLLPT
SYQLIKFEDLVHFPQNTTERIFAFLGIPLSPATLNQILFATSTNLFYLPYEGEISPANTNVWKRNLPKDE
IKLIENICWTLMDRLGYPKFMD
>59538
MALMFTGHCLFLVLVMFAFSTLEESVSNYSDWAVFTDDIDPFKIQRVQDVRPNQKLKKSMLHPRLYFDAG
EIQAMRQKSRTTHLHLFRAIRSAVTAMLSNPTYYLPPPKHADFAAKWNEIYGNNLPPLALYCLLCPEDKV
AFEFALEYMDRMVGYKDWLVENAPGDEVPVGHSLTGFATAFDFLYNLLDGRRRQKYLEKIWVITEEMYEY
SKVRSWGKQLLHNHQATNMIALLTGALVTGVDKGTKVNLWKQVVVDVMEKTMFLLNHIVDGSLDEGVAYG
SYTAKSVTQYVFLAQRHFNINNLDNNWLKMHFWFYYATLLPGFQRTVGIADSNYNWFYGPESQLVFLDKF
VLKNGAGNWLAQQIRRHRPKDGPMVPSTAQRWSTLHTEYIWYDPQLTPQPPAEYGTAKMHLFPNWGVVTY
GAGLPNTQTNTFVSFKSGKLGGRAVYDIVHFQPYSWIDGWRSFNPGHEHPDQNSFTFAPNGQVFVSEALY
GPKLSHLNNVLVFAPSPTSQCNKPWEGQLGECAQWLKWTGEEVGDAAGEIITASQHGDMIFVSGEAVSAY
SSAMKLKSVYRALLLLNSQTLLVVDHVEKQEDSPIKSVSAFFHNLDIDFKYIPYRFTNKYNGALMDVWDA
HYKMFWFDHRGSSPLASIQEAEQAAEFKKRWTQFVNVTFQMESAITRIAYVFYGPYVNVSSCRFIDNTNS
GLQLSLNVNNTDHVVSIVTDYQNLKTRFDYLGFGGFATVADQAQVTRFGLGTEAIVKPIRRDRVIFPFGF
KFNVAVGFILCIGLVILTFQWRFYLSFRKLMRWILILVIALWSVELLDVWSACTQPICAKWARPETEASG
QALAPGGQRTDPPDVVITSLPGSGAEILKQLFFNSSDFLYIRVPTAYIDIPETELEIDSFVDACEWRASD
VHSVRFRLLRGWLQSLVRDTKLHLQNIHLHEPGRGKLAQYFTMNKDKKRKLKRRESLAEQRSRMKGAFDR
DAEYVRALRRHLVYYPSARPVLSLGSGSWTLKLHFFHEVLGASMKALYVVRDPRAWVYSMLYSSKPSLYS
LKNVQEHLAKLFKTEGGAGRCTLNSGYAVEYELLRKELLASRPHPVSLLAHAWLANTAAALRINADLLPT
SYQLIKFEDLVLFPQNTTERIFAFLGIPLSPATLNQILFATSTNLFYLPYEGEISPANTNVWKRNLPKDE
VKLIENICWTLMDRLGYPKFMD
>7897
MALRFAERSVVWISLLLVVSASSGLLNGSSADTGVLAGDVKQQQGRAQHLGKHSRGRSSDRHPSLYFDAG
EVRILRHKSRTTHSHLFRTIRNAVKEMLSSPHLYIPPPKHEDFAAKWNEIYGNNLPVLTFYCLLNPEDRT
AFNFAQDYMDRMSSYPSWYVKGLSIDEVPVAHSLTGFAIAFDFLYASLDNIRRSKYLDKIRAVSAELYEQ
SKFRSWSKQLLHNHQTTNFVALLIGGLVAGVHNDPQATIWKQVAVEVMEKTMFLLNHIVDGSLDEGVAYG
SYTSKSVTQYVFLAQRHFNINHYQNNWLKVHYWFYYATVLPGFQRTVGVADSNYNWFYGPESQLVFLDTF
VLRNGAGTWLAQQIRKHRPRDGPMVQSVSQRWSTLHTEFIWYDPSIAPQPPKDFGIPKLHVFPNWGVVTY
GASLPSTQANTFVSFKSGKLGGRAVYDIVHLKPYSWLNGWRSFNPGHEHPDQNSFTFAPNGQVFVSEALY
GPKYSYLNNVLVFAPSPTSQCNIPWEGQLGECAHWLKWTTDETGDAAGEIITASYHGEMMFVSGEAVSAY
SSAMKLKSVYRALLLVNSQTLLVVDHIEKQEDSPVNLVSAFFHNLDIDFKYVPYRFTGKYNGAMMDVWDA
HYKMFWFDHYGNSPPANIQEAEQAAEFKKRWTQFANVTFEMKSTVTRIVYVFHGPYVKVSNCTFVEKSTY
GLKIALNVNNSEKIVSIVTQYQDPSIRFNYLGFGGYAKIEDKAQTTRFGLGIEVFSKQKTVTADIYQFGL
RVSLLVTLTLFIGLGLLALHHRFYVSFRRVMHSILVLVLILWFYELLDVWNVCTLPQCARRNSHVTESDI
GKSSKELEGRTFYLPTVVITSLPNSGAEILKHLFYNSTDFVPIKVPTEYLDIPETEFEFDSFVDACEWKT
TDAKSGRFRLIQGWLHSLVQNTKLHLQNTQLHELSTNRITQGSNPSKNRKKRYRNNDSLTEMKRREKIIL
DRNAEYIRELRRHLTSYPSARVVLSLSSGSWTLKLPFLQEVIGPSMRALYIVRDPRAWIYALLHNSKPSI
YSQKNIPQHLAMLFKEMESKEKCSPADYAFEFDSVQKEMSDSDFSAVSLLAHLWQAHTAAALRINGDLLS
TNYQLIKFEDIVTIPQETSEKIFAFLGIPVSPASLNQILFATSTNLVHLPYEGEISPTSINSWKQNMPRK
DILIIENICWTVMNELGYSKFVD
>38654
MALVFTGHILFLALVLFAVSTFEESVSNFSDWVTFTENMDQYEKQKLHGFSASQKLRKPVLHPSLYFDAE
DVPALRQKSRTSHLHLFRAIRSAVTVMLSNPSYYLPPPKHADFAAKWNEIYGNNLPPLAFYCLLCPEDKA
AFDFTLEYMDRMAGYKDWLVENAPGDEVPLGHSLTGFATAFDFLYNSLGNVRRQKYLEKIWSVSEEMYDY
SKVHSWGKQLLHNHQATNMLALLTGALVTGVGKESQANIWKHTVVDVMEKTMFLLNHIVDGSLDEGVAYG
SYTAKSITQYVFLAQRHFGMNNLENNWLKMHFWFYYATLLPGFQRTVGIADSNYNWFYGPESQLVFLDKF
VMKNGAGNWLAQQIRKHRPKDGPMVPSTAQRWSTLHTEYIWYAAELTPQPPPGYGTAKMHMFPNWGVVTY
GAGLPNTQTNTFVSFKSGKLGGRAVYDIVHFQPYSWIDGWRSFNPGHEHPDQNSFTFAPNGQVFVSEALY
GPKFSHLNNVLVFAPSPTSQCNQPWEGQLGECGQWLKWTGDEVGDASGEIITASQYGEMMFVSGEAVSAY
TSEMKLRSVYRALLLLNTQTLLVVDHIEREEDSPISSVSAFFHNLDIDFKYIPYKFKNKYNGAMMDVWDA
HYKMFWLDHHGSSPVARIQEAEQAAEFKKRWTQFVNVTFSIKNTVKRIAYLFYGPYVNVSNCRFIDDSKS
GFQISLDVNNTENIVSVVTDYQNLRTRFNYLGFGGFAKVADESKVIKFGLGTEAIEKHITSDRTVFPFGF
KVNMIAGLILGISLVILAFQWRFYISFSKMLRWILLLVIILWLIELVDVWSTCTQPICAKWNSDTTSVEP
DTTHRAKQSEQNPVVLPDVVITSLPGSGAEILKQLFFNSSDFIYIRIPTGYLDVPETEFEIDSFVDACEW
KASDVQHGHFRLLRGWLQSLVQDTRLHLQNIHLYEASRTKVAQHSTISKDRKRRSRKRESLSEQKSKMRG
NMDKDAEYIRELRRHLVYYPNARPVLSFNSGSWTLKLPFFQEIIGPSMRALYVVRDPRAWIYSMLYNSKP
SLYSLKNIPQHLAKLFKVENGKGKCSLNSGYTFEYESLREELSASNSNPVSVLSHLWIANTAAALRVNGD
LLPTNYQLVKFEDIVNSPQQTAETIFAFLGIPLSPASLNQILFATSTNLFYLPYEGEISPISIHAWKQNM
PTEEIRLIEDICCSLMDHLGYPKFTD
>13735
MALMFTLLVLAMFALSTFEESVSNYSDWVTFAENVAQYEKQKLQDFSADQKLKKVVLHPSLYFDAEDVQT
LRQKSRTSHLHLFRAIRGAVTVMLSNPSYYLPPPKHADFAAKWNEIYGNNLPPLAFYCLLCPEDKAAFDF
VLEYMDRMSGYKDWLVENAPGDEVPLGHSLTGFATAFDFLYSSLDNIRRQKYLKKIWAVSEEMYEYSKVR
SWGKQLLHNHQATNMLALLTGALVTGVDKESQTNVWKHAVVDMMEKTMFLLNHIVDGSLDEGVAYGSYTA
KSVTQYVFLAQRHFGINNLENNWLKMHFWFYYATLLPGYQRTVGIADSNYNWFYGPESQLVFLDKFVLKN
GAGNWLAQQIRKHRPKDGPMVPSTAQRWSTLHTEYIWYAAELTPQPPLDYGTAQMHVFPNWGVVTYGAGL
PNTQTNTFLSFKSGKLGGRAVYDIVHFQPYSWIDGWRSFNPGHEHPDQNSFTFAPNGQVFVSEALYGPKF
SHLNNVLVFAPSPTSQCNQPWEGQLGECAQWLKWTGDEVGDSAGEIITASQYGEMMFVSGEAASAYSSAM
KLKSVYRTLLLLNAQTLLVVDHIEKEKDSPLSSVSAFFHNLDIDFKYIPYMFMNKYNGAMMDVWDAHYKM
FWFDHHGSSPVARIQEAEQAAEFKKRWTQFINVTFPMKTTVTRIAYVFHGPYVNVSNCRFIDDSKYGFQI
FLNVNNTENIVSVVTEYHSLRTRFNYLGFGGFAKVADQNKVIKFGLGTETVQRQTTNNSIVFPFGFKVNI
IVGLVLSISLVILAFQWRFYISFSKLLRWILILVITLWFIELMDVWSTCTQPICAKWNSDIINVDPDAGN
KAKQSEGNPVVLPDVVITSLPSSGAEILKQLFFNSSDFIYIRIPTTYLDIPETEFEIDSFVDACEWKASD
VQSGHFHVLRGWLQSLVQDTKLHLQNIHLHEGSRSKVAQHSIVNKDKKRRARKRESLSEQRSRARGKLDK
DAEYVRELRRHLAYYPNARPVLSLSSGSWTLKLPFFQEIIGPSMRALYVVRDPRAWIYSMLHKSKPSLYS
LKNVPQHLAMMFKVEDGKEKCSLNSGYAFEYEALREELMDSRSNAVSVLSHLWLANTAAALRVNGYLLQT
NYQLVKFEDIVSSPQKTAERIYAFLGIPLSPASLNQILFATSTNLFYLPYEGEISPISIQAWEQDMPVED
IRLIEDICCTVMGHLGYPKFTV
>419612
MALVFTGHFLLLALVMFAFSTFEESVSNYSDWAVFTDDIDQFKTQKVQDTRPNQKLKKSMLHPRLYFDAG
EIQAMRQKSRTSHLHLFRAIRSAVTVMLSNPTYYLPPPKHADFAAKWNEIYGNNLPPLALYCLLCPEDKV
AFEFVLEYMDRMVGYKDWLVENAPGDEVPVGHSLTGFATAFDFLYNLLDDHRRQKYLEKIWVITEEMYEY
SKVRSWGKQLLHNHQATNMIALLTGALVTGVDKGSKVNIWKQVVVDVMEKTMFLLNHIVDGSLDEGVAYG
SYTAKSVTQYVYLAQRHFNINNLDNNWLKMHFWFYYATLLPGFQRTVGIADSNYNWFYGPESQLVFLDKF
ILKNGAGNWLAQQIRRHRPKDGPMVPSTAQRWSTLHTEYIWYDPQLTPQPPAEYGTAKMHTFPNWGVVTY
GAGLPNTQTNTFVSFKSGKLGGRAVYDIVHFQPYSWIDGWRSFNPGHEHPDQNSFTFAPNGQVFVSEALY
GPKLSHLNNVLVFAPSPTSQCNQPWEGQLGECAQWLRWTGEEAGDAAGEIITASQHGEMVFVSGEAASAY
SSAMKLKSVYRALLLLNSQTLLVVDHVSRQDDSPIKSVSAFFHNLDIDFKYIPYRFMNRYNGAMMDVWDA
HYKMFWFDHRGGSPVASIQEAEQAAEFKKRWTQFVNVTFQMESTITRIAYVFYGPYVNVSSCRFIDNSNS
GLQISLNVNNTEHVVSIVTDYHNLKTRFDYLGFGGFASVADQTQVTRFGLGTQATVKPVRRDRVIFPFGF
KFNVAVGLILCISLVILAFQWRFYLSFRKLMRWILLLVVALWFVELLDVWSACTQPICATWARTGAEASA
KPLSPEGYHIRLPDVVITSLPGSGAEILKQLFFNSSDFLYIRVPTAYIDIPETEFEIDSFVDACEWKASD
VHSVHFRLLRGWLQSLVQDTKLHLQNIHLHEPSRGKLAQYFATNKDKKRKLKRRESLPEQRNRMKGAFDR
DAEYIRALRRHLVSYPSARPVLSLSSGSWTLKLHFFQEVLGASMRALYVVRDPRAWIYSMLYSSKPSLYS
LKNVPEHLAKLFRIEGGKGQCSLNSGYAFEYESLRKELSKPKPHAVSLLAHLWRANTAAALRINTDLLPT
GYRLIKFEDIVHFPQKTTERIFAFLGIPLSPASLNQILFATSTNLFYLPYEGEISPTNTNVWRQNLPRDE
IKLIENICWTLMARLGYPKFTD
>30538
MALVFTGHFLLLALVMFAFSTFEESVSNYSDWAVFTDDIDQFKTQKVQDTRPNQKLKKSMLHPRLYFDAG
EIQAMRQKSRTSHLHLFRAIRSAVTVMLSNPTYYLPPPKHADFAAKWNEIYGNNLPPLALYCLLCPEDKV
AYEFVLQYMDRMVGYRDWLVENAPGDEVPVGHSLTGFATAFDFLYNLLDDHRRQKYLEKIWVITEEMYEY
SKVRAWGKQLLHNHQATNMVALLTGALVTGVDKGSKVNIWKQVVVDVMEKTMFLLNHIVDGSLDEGVAYG
SYTAKSVTQYVYLAQRHFNINNLDNNWLKMHFWFYYATLLPGFQRTVGIADSNYNWFYGPESQLVFLDKF
ILKNGAGNWLAQQIRRHRPKDGPMVPSTAQRWSTLHTEYIWYDPQLTPQPPAEYGTAKMHTFPNWGVVTY
GAGLPNTQTNTFVSFKSGKLGGRAVYDIVHFQPYSWIDGWRSFNPGHEHPDQNSFTFAPNGQVFVSEALY
GPKLSHLNNVLVFAPSPTSQCNQPWEGQLGECAQWLRWTGEEAGDAAGEIITASQHGEMVFVSGEAASAY
SSAMKLKSVYRALLLLNSQTLLVVDHVSRQDDSPIKSVSAFFHNLDIDFKYIPYRFMNRYNGAMMDVWDA
HYKMFWFDHRGGSPVASIQEAEQAAEFKKRWTQFVNVTFQMESTITRIAYVFYGPYVNVSSCRFIDNSNS
GLQISLNVNNTEHVVSIVTDYHNLKARFDYLGFGGFASVADQIQVTRFGLGTQAIVKPVRRDRVIFPFGF
KFNVAVGLILCISLVILTFQWRFYLSFRKLMRWILILVVALWFVELLDVWSACTQPICATWARTGAEASA
KPPSPEGYHVHLPDIVITSLPGSGAEILKQLFFNSSDFLYIRVPTAYIDIPETEFEIDSFVDACEWKVSD
VHSVHFRLLRGWLQSLVQDTKLHLQNIHLHEPSRGKLAQYFATNKDKKRKLKRRESLPEQRSRMKGAFDR
DAEYIRALRRHLVSHPSARPVLSLSSGSWTLKLHFFQEVLGASMRALYVVRDPRAWIYLMLYSSKPSLYS
LKNVPEHLAKLFRIEGGKGQCSLNSGYAFEYESLRKELSKPKPHAVSLLAHLWRANTAAALRINTDLLPT
SYRLIKFEDIVHFPQKTTERIFAFLGIPLSPASLNQILFATSTNLFYLPYEGEISPTNTNVWRQNLPRDE
IKLIENICWTLMARLGYPKFTD
>246437
MALMFTGHFLFLALVMFGFSTFEESVSNYSEWAVFTDDIDQFKMQKVQDFRPNQKLKKSMLHPSLYFDAG
EVQAMRQKSRTSHLHLFRAIRSAVTVMLSNPTYYLPPPKHADFAAKWNEIYGNNLPPLALYCLLCPEDKV
AFEFVLEYMDRMVGYKDWQVENAPGDEVPIGHSLTGFATAFDFLYNLLDNHRRQTYLEKIWVITEEMYEY
SKVRSWGKQLLHNHQATNMIALLTGALVTGVDKGSTSNIWKQVVVDVMEKTMFLLNHIVDGSLDEGVAYG
SYTAKSITQYVFLAQRHFNINNLDNNWLKMHFWFYYATLLPGFQRTVGIADSNYNWFYGPESQLVFLDKF
ILKNGAGNWLAQQIRKHRPKDGPMVPSTAQRWSTLHTEYIWYDPQLTPXXXXXXXXXXXAEYGTAKMHMF
PNWGVVTYGAGLPNTQTNTFVSFKSGKLGGRAVYDIVHFQPYSWIDGWRSFNPGHEHPDQNSFTFAPNGQ
VFVSEALYGPKLSHLNNVLVFAPSPSSQCNKPWEGQLGECAQWLKWTGEEVGDAAGEIITASQHGEMLFV
SGEAVSAYSSVMRLKSVYRALLLLNSQTLLVVDHIERQGDSPIHSVSAFFHNLDIDFKYIPYRFMNRYNG
AMMDVWDAHYKMFWFDHRGNSPMATIQEAEQAAEFKKRWTQFVNVTFQMESTITRIAYVFYGPYVNVSSC
KFIDNSNSGLQISLNVNNTEHVVSIVTDYRNLKTRFNYLGFGGFANVADQGQITRFGLGTQAIVKPVKHD
RVIFPFGFKFNIAIGLILCISLVILTFQWRFYLSFRKLMRWILLLVIALWFIELLDVWSTCTQPICAKWT
RTEDEASKKTLPSEGQRVDLPDVVITSLPGSGAEILKQLFFNSSDFLYIRVPTAYIDIPETEFEIDSFVD
ACEWKVSDIHSGHFRLLRGWLQSLVQDTKLHLQNIHLHEPSRGKQAQYFTMNKDKKRKLKRRESLPEQRS
RMKGAFDRDAEYIRALRRHLVYYPSARPVLSLSSGSWTLKLHFFQEVLGASMRALYIVRDPRAWIYSMLY
SSKPSLYSLKNVPEHLAKLFKIEGGKGKCNLNSGYAFEYEVLRKELSKSKSNAVSLLSHLWLANTAAAMR
INTDLLPTSYQLVKFEDIVHFPQKTTERIFAFLGIPLSPASLNQILFATSTNLFYLPYEGEISPTSTNVW
KQNLPRDEITLIESICWTLMDRLGYPKFMD
>8496
MALVFTGHTLFLALVLFAVSTFEESVSNFSDWVTFTENMDQYEKQKLHGFSASQKLRKPVLHPSLYFDAE
DVPALRQKSRTSHLHLFRAIRSAVTVMLSNPSYYLPPPKHADFAAKWNEIYGNNLPPLAFYCLLCPEDKA
AFDFTLQYMDRMAGYKDWLVENAPGDEVPLGHSLTGFATAFDFLYNSLGNVRRQKYLEKIWSVSEEMYDY
SKVHSWGKQLLHNHQATNMLALLTGALVTGVGKESQANIWKHTVVDVMEKTMFLLNHIVDGSLDEGVAYG
SYTAKSITQYVFLAQRHFGMNNLENNWLKMHFWFYYATLLPGFQRTVGIADSNYNWFYGPESQLVFLDKF
VMKNGAGNWLAQQIRKHRPKDGPMVPSTAQRWSTLHTEYIWYAAELTPQPPPGYGTAKMHMFPNWGVVTY
GAGLPNTQTNTFVSFKSGKLGGRAVYDIVHFQPYSWIDGWRSFNPGHEHPDQNSFTFAPNGQVFVSEALY
GPKFSHLNNVLVFAPSPTSQCNQPWEGQLGECGQWLKWTGDEVGDASGEIITASQYGEMMFVSGEAVSAY
TSEMKLRSVYRALLLLNTQTLLVVDHIEREEDSPISSVSAFFHNLDIDFKYIPYKFKNKYNGAMMDVWDA
HYKMFWLDHHGSSPVARIQEAEQAAEFKKRWTQFVNVTFSIKNTVKRIAYLFYGPYVNVSNCRFIDDSKS
GFQISLNVNNTENIVSVVTDYQNLRTRFNYLGFGGFAKVADESKVIKFGLGTEAVEKHITSDRTVFPFGF
KVNMIAGLILGISLVILAFQWRFYISFSKMLRWILLLVIILWLIELVDVWSTCTQPICAKWNSDTTSVEP
DTTHRAKQSEQNPVVLPDIVITSLPGSGAEILKQLFFNSSDFIYIRIPTGYLDVPETEFEIDSFVDACEW
KASDVQRGHFRLLRGWLQSLVQDTRLHLQNIHLYEASRTKVAQHSTISKDRKRRSRKRESLSEQKSKMRG
NVDKDAEYIRELRRHLVYYPNARPVLSFNSGSWTLKLPFFQEIIGPSMRALYVVRDPRAWIYSMLYNSKP
SLYSLKNIPQHLAKLFKVENGKGKCSLNSGYTFEYESLREELSASNSNPVSVLSHLWIANTAAALRVNGD
LLSTNYQLVKFEDIVNSPQQTAETIFAFLGIPLSPASLNQILFATSTNLFYLPYEGEISPTSIHAWKQNL
PTEEIRLIEDICCSLMDHLGYPKFTD
>7918
MALRFMGRSVVLLSFLALGTAFSGVFNSSDKEIFNDDLEQAEQKKLIDYNTIEQWTHVAPNLHPNLYFDP
GDISSLRQKSTTTHSHIFKVIRTAVITMLSNSQLYLPPVKHEEFSAKWNEIYGNNLPPLALYCLICPDDT
AAFQFLVKFMDRMAEYPNWMVTSAPNDEVPMAHSLTGFATAFDFIYANLDSSRREKFLKKILSVTEELYE
VSKYRAWGKQFLQNHQTTNILAILIGAIVAGMHNNQETMMWKQVAVNYMEKTMFLLNHIVDGSLDEGVAY
GSYTAKSVTQYVFLALRHFNIDNTQNNWLKEHVWFYYATLLPGFQRTVGIADSNYNWFYGPESQLVFLDT
FVLKNGTGNWLAQQIRKHRPKDSPMGQSTAQRWTTLHTEYIWYNAHLNSQPPHGSGSPRMHIFSNWGVVT
YGAALPNSQGNTFVSFKSGKLGGRAVYDIVHMKPYSWIDDWNNFNPGHEHPDQNSFTFAPNGQVFVSEAL
YGPKYSYLNNVLVFAPSPTSQCNEPWEGQMGECAKWLRWTDDKVGDTAGEVITASYHKDMMFIAGEAGPA
YSPAMKLKSVYRALVLLNSQTLLVVDHVEKEENSPINLISAFFHNLDIDFKYVPYRFMERYSGALMDVWD
AHYKMFWFDHQGSSPVPNIQEAEQAAEFKKRWTQFVNVTFQMKSTVSRMVYVLHGPYVKLTNCRFLDNSK
NGLKLGVTINNTEKIVSIVTQYRDLGARLSYLGFGGYAKVEDRQQVTRFGLGTQPVLNPSTTDSTLLDFG
FVVNLIAGVTLCVAIGFLTLQRKFYICFSKIMRYALITVLLLWIIELLFVSNSCDQLLCGVKWSGIITDP
DANVETKLSKQHPFLLPTVVITTLPGSGAEILKHLFYNNSDFIYLRIPTEHLDLPETDFEFDSFVDVCEW
SRSDALNGRFKIIQGWFHSLVHNPKIHLQNIQLHEMSRGKLTQRGSALKDKKKRIKRKEPLTEQKGRAKG
SLDRDAEYIKELRRHIGLYQNARVVLSLRSGSWALKLPFIQEVIGPSLRALYVVRDPRAWIYLMLYNSKP
NLYTLKNIPQHLSMIFKGDNNGDSCHPSLGCTPEFKTLHRLLSHSESNPVLLLAHLWLAHTSAAQRINNN
LLPVNYLLVKFEDIVHYPQETAEKVHTFLGIPVTPAAINQLLFATQTNMFSLLYEGDISPTNINTWRQKM
PRKDIKIIEDVCWSVMKKLGYLKFTS
>32507
MCSQTPGNMAGSWVVYSAFLLPLFAVGTAFSGVFNTTDRDVFTDDLLQVKLTQDRASEHWKLQSADSHPN
LYFNQVDVLHLRQRSSTTHSHIFKVIRAAVLTMLSNVPFYLPPVKHEEFTSKWNEIYGNNLPPLALYCLL
CPEDSAALQFLIKFMDRMAEYSDWKVTSAPNDEVPMAHSLTGFATAYDFIYSYLDQRRKDLYLKKIRAET
VELYELSKYRGWGKQYLQNHQTTNILAILTGAIVVGSHDDPESMIWKQVAVNYMEKTMFLLNHVVDGSLD
EGVAYGSYTAKSITQYVFLAQRHFNIDNMQNNWLRSHFWFYYATLLPGFQRTVGIADSNYNWFYGPESQL
VFLDTFVMKNGTGNWLAQQIRKHRPKDGPMGQSSAQRWATLHTEYIWYNSHLPPQPPHDFGKAKMHIFSN
WGVVTYGAGLPNGQSNTFVSFKSGSLGGRAVYDIVHDKPYSWVDGWNSFNPGHEHPDQNSFTFAPNGQVF
VSEALYGPKYSYLNNVLVFGPSPTSQCNNPWEGQLGECAKWLRWTDEGVGDARGEVIAASSHKDTMFVSG
EAALAYSPAMRLKSVFRALVLLNSQTLLVLDHVEKWGDSPIKSLSAFFHNLDIDFKYVPFRFMDRYNGAM
MDVWDAHYKMFWFDTQGHSPETRLQEAEQAAEFKKRWTQYINVTFQMTGPVSRVAYVLHGPYVKVSNCRF
IDNSKNGVRLSLIINNTEKIVSIATNYKDIGARLSYLGFGGHSKVEDRYQITRYGLGTQILPKQISSDNQ
LFDFGFTVNVIAGVVLCVAIGFLTMQRKFYVCFSRLMRYALLTVLLLWIAELLFVSNSCDQLLCGVKWKG
AGAKSEVNKQIRLYEQHRLPLPTVVITTLPGSGSEILKHLFYNSSDFVYIRVPTEHVDIPETEFEFDTLV
DACEWSRSDAVNARFKIIQGWLHSLVHNTKLHLQNIQLVEGSRVKQTQRASVPRDRKKRSRKREPASDLK
GKLRASLDRDAEYVREMRRHVAEYPNARVVINMQSGSWTLKLPFIQEVVGLSLRTIYLVRDPRAWIYLMV
YNSKPSLYSLKNIPQHLSLIFKEDAVRDGCSAVAPEFKMIQRLLSRYETNPVLILAHLWLAHTAAALRVS
ESLPEESFLRVRFEDVVNFPQETAETIHTFLGVPVSPTALNQLIFTTSTNLYNLMYEGDISPANINIWRQ
KMSRKDLRLIEDVCGSVMKRLGYTRFAS
>225400
MALMFTGHFLFLALVMFAFSTFEESVSNYSDWAVFADDIDQFKTQKVQDFGSNQKLKKSMLHPSLYFDAG
EIPTMRQKSRTSHLHLFRAIRSAVTVMLSNPTYYLPPPKHADFAAKWNEIYGNNLPPLALYCLLCPEDKV
AFEFVLEYMDRMVGYKDWLVENAPGDEVPIGHSLTGFATAFDFLYTLLDDHRRQKYLEKIWVITEEMYEY
SKVRSWGKQLLHNHQATNMIALLTGALVTGVERESKVNLWKQVVVDVMEKTMFLLNHVVDGSLDEGVAYG
SYTAKSVTQYVFLAQRHFNINNLDNNWLKMHFWFYYATLLPGFQRTVGIADSNYNWFYGPESQLVFLDKF
ILKNGAGNWLAQQIRRHRPKDGPMVPSTAQRWSTLHTEYIWYDPQLTPQPPADYGTAKMHTFPNWGVVTY
GAGLPNTQTNTFVSFKSGKLGGRAVYDIVHFQPYSWIDGWRSFNPGHEHPDQNSFTFAPNGQVFVSEALY
GPKLSHLNNVLVFAPSPTSQCNKPWEGQLGECAQWLKWTSEEVGDAAGEIITASQHGEMIFVSGEAVSAY
SSAMKLKSVYRALLLLNSQTLLVVDHIEKQDDSPIKSVSAFFHNLDIDFKYIPYRFMNKYNGAMMDVWDA
HYKMFWFDHHGNSPVASIQEAEQAAEFKKRWTQFVNVTFQMESTITRIAYVFHGPYVNVSSCRFTDNSNS
GLQISLNVNNTEHVVSIVTDYYNLNTRFSYLGFGGFANVADQGQITRFGLGSQAIVRPVRQDQVIFPFGF
KFNIAIGLILCISLLILTFQWRFYLSFRKLMRWILILVVVLWFIELLDVWSTCTQPICAKWARTEMEAST
KSVSSQGHHVDRPDVVITSLPGSGAEILKQLFFNSSDFLYIRVPTAYIDIPETEFEIDSFVDACEWKASD
IHSVHFRLLRGWLQSLVQDTKLHLQNIHLHESSRGKLAQYFIVNKDKKRKSKRRESLSEQRSRMKGAFDR
DAEYIRALRRHLVYFPSARPVLSLSSGSWTLKLHFFQEVLGSSLRALYVVRDPRAWIYSMLYSSKPSLYS
LKNIPERLAKLFKVEGGKGRCSLNSGYALEYESLRKELSKPKSNAVSLLSHLWLAHTAAALRINADLLPT
SYQLIKFEDIVHFPQKTTERIFAFLGIPLSPASLNQILFATSTNLFNLPYEGEISPSNNNVWKQNLPRDK
IKQIENICWTLMDRLGYPKFMD
>9713
MALMFTGHFLFLALVMFAFSTFEESVSNYSDWAVFTDDIDQFKTQKVQDFKPNQKLKKSMLHPSLYFDAG
EIQAMRQKSRTSHLHLFRTIRSAVTVMLSNPTYYLPPPKHADFAAKWNEIYGNNLPPLALYCLLCPEDKV
AFEFVLEYMDRMVGYKDWLVENAPGDEVPVGHSLTGFATAFDFLYNLLDDHRRPKYLEKIWAVTEEMYEY
SKVRSWGKQLLHNHQATNMIALLTGALVTGVDKGSKANVWKQVVVDVMEKTMFLLNHVVDGSLDEGVAYG
SYTAKSVTQYVFLAQRHFNINNLDNNWLKMHFWFYYATLLPGFQRTVGIADSNYNWFYGPESQLVFLDKF
ILKNGAGNWLAQQIRRHRPKDGPMVPSTAQRWSTLHTEFIWYDPQLTPQPPAEYGTAKMHTFPNWGVVTY
GAGLPNTQSNTFVSFKSGKLGGRAVYDIVHFQPYSWIDGWRSFNPGHEHPDQNSFTFAPNGQVFVSEALY
GPKLSHLNNVLVFAPSPTSQCNEPWEGQLGECAQWLKWSGEEAGDAAGEIVTASQHGEMIFVSGEAVSAY
SSAMKLKSVYRALLLLNSQTLLVVDHVEKQDNSPIKSVSAFFHNLDIDFKYIPYRFMNRYNGAMMDVWDA
HYRMFWSDHRGSSPIASIQEAEQAAEFKKRWTQFVNVTFQMESAITRIAYVFYGPYVNVSSCRFIDNSNS
GLQISLNVNNTEHVVSIVTDYHNLKTRFDYLGFGGFASVADQGQITRFGLGTQTIAKPIRQDRVIFPFGF
KFNIAVGLILCISLVILTFQWRFYLSFRKLMRWILILVIALWFIELLDVWSACTQPLCAKWARTEAEASR
KSLSSEGHHLDLPDVVITSLPGSGAEILKQLFFNSSDFLYIRVPTTYIDIPETEFEIDSFADACEWKASD
IHSVHFRLLRGWLQSLVQDTKLHLQNIHLHEPSRGKLAPYFTANKDKKRKLKRRESLPEQRSRMKGTFDR
DAEYIRALRRHLVYYPSARPVLSLSSGSWTLKLHFFQEVLGASMRALYIVRDPRAWIYSMLYSSKPSLYS
LKNVPEHLARLFKIEGGKGKCNLNSGYAFEYESLRKELSKSTSSAVSLLSHLWLANTAAALRINTDLLPT
SYQLIKFEDIVHFPQKTTERIFAFLGIPLSPASLNQILFATSTNLFYLPYEGEISPSNTNVWKQNLPRDE
IKLIENICWTLMERLGYPKFMD
>28737
MRWILILVIALWCIELLDVWSTCTQPICAKWTRTLASAARKAPSSEEHHVSLPSVVITSLPGSGAEILKQ
LFFNSSDFLYIRVPTPYIDIPETEFEVDSFVDACEWKASDVRSGHFRLLRGWLQSLVQDTKLHLQNIHLH
EPSRGKLTQYLPANKDRKRKSKRRESLQEQRSRMKSTFDRDAEYIRALRRHLVCYPSARPVLSLSSGSWT
LKLNFFQEVLGASLRALYVVRDPRAWVYSVLYSSKPSLYSLKNVPEHLGKLFKIEDGKEKCNLDSGYAFE
YESLRKEFSKSQSNAVSLLSHLWLANTAAALRINTDLLPTSYQLVKFEDIVHFPQKTTERIFAFLGIPLS
PASLNQILFATSTNLFYLPYEGEVSPTNINIWKQNLPRDEIKLIENICWTLMDRLGYPKFLD
>10224
MKVSKVMWVLLLFVLITTCFCYQLQSPFSGHPMLYFGSEDVANLRRKAVTTHRHIAAVLSDAANSMLEKP
DYYLPSTDYDVFAARWNEVYGNNLCALAFYCVLFPDDVKARKLAIQFMDNLVELPQWQVKEIPKDEVPVA
HTFIGLTTAFDFLHEYLDEGRHERMLNRIKQETKEFDRFARIRSWGKFYLQNHVATNYLALIHGCLVVQQ
YDDAADKWMQEAVTKFERTMFLLNFIVDGSLDEGVAYGTYTSRSLTQYAFLSLRHWNIDHTKDFWFQQHF
WFFYNTMLPGFQRNVAIADSNHNWFYGPESQLVFLDAFIMRNGYGNWLANEIRQHRPTVKELKHISASSS
QKWCTIHTEFLWYDASIKPKPPPEYENGNLHTFTDWGVVTYSKISSQDDKETFLAFKSAKIHGRAIFDIV
NSDRYKSWINGWSSFNPGHEHPDQNMFIFAPNGQLFISDALYGPKYTFLNNVLTFGPSELSECFEPWIGQ
LGECSKWLQWKKPEVGKSNGEVITATKVDEMVHMSGEAKNAYHSDLGLQSVYRNLILLNSKSLVVNDHIA
VTSLSSVKHVSAFFHNTDVPFQSDSFGEKAQGAKITVNGEDYQMFWMKYGDLSEVPVKLPNVVVTSLPGA
GAEIVSQMFYPNPDFVYLTVPSPAIRNVETELQMDGFVDACTWKDVNEPRFSRLSNWLRTLLENPATLTI
EKTIESTDNDKNGNAKPVNDELNLSPLQPSDVNFKEYNDKMMLEHLEEHPHALPVLHLSSGTWPLKLPWL
HRNLGDNLHSLYIICDPRLWISNILASSDSKSIYNHLNLQQYLQNMFEEIDKNTFCGPNNGYVWHFEQLR
RILSNANPPPHRILAFLWLSHVQAVMDNIKTKTDREMIVKFENIINHPEETLKEVYKFLDMPVRPMVTHQ
LIQAAKTGAFAIPYLGVVNQDSTQLWKKHLSTDQIQDIEHICSSLMKQFKYKKWKQ
>185453
MALMFTGHFLFLALVMFGFSTFEESVSNYSEWAVFTDEINQFETQKVQDFRPNQRPKKSMLHPSLYFDAG
EIQAMRQKSRTSHLQLFRAIRSAVTVMLSNPTYYLPPPKHADFAAKWNEIYGNNLPPLALYCLLCPEDKV
AFEFVLEYMDRMVAYKDWLVENAPGDEVPVGHSLTGFATAFDFLYNLLDNHRRQKYLEKIWVVTEEMYEY
SKVRSWGKQLLHNHQATNMMALLTGALVTGADKGSKANIWKQIVVDVMEKTMFLLNHIVDGSLDEGVAYG
SYTSKSVTQYVFLAQRHFNINNLENNWLKMHFWFYYATLLPGFQRTVGIADSNYNWFYGPESQLVFLDKF
VLKNGAGNWLAQQIRKYRPKDGPMVPSTAQRWSTLHTEYIWYDPQLTPQPPADYGTAKMHIFPNWGVVTY
GAGLPYTQANTFVSFKSGKLGGRAVYDIVHFQPYSWIDGWRSFNPGHEHPDQNSFTFAPNGQVFVSEALY
GPKLSHLNNVLVFAPSPSSQCNKPWEGQLGECAQWLRWTGEEVGDAAGEIITASQHGERMFVSGEAVSAY
SSAMKLKSVYRALLLLNSQTLLVVDHIDKHEDSPISSVSAFFHNLDIDFKYISYRFMNRYNGAMMDVWDA
HYKMFWFDHHGHSPMASIQEAEQAAEFKKRWTQFVNVTFPMQSTSMRIAYVFYGPYVNVSSCRFIDNSQS
GLQISLNVNNTEHVVSIVTDYHDLKTRFSYLGFGGYATVTDQGQITRFGLGTQTVGKPIRHDRVIFPFGF
KFNIAVGLILCISLVILAFQWQFYISFRKLMRWILLLVIALWFIELLDVWGTCTQPICAKWTRPEAKTSK
KSLSSEEHYIHLPDVVITSLPGSGAEILKQLFFNSSDFLYIRVPTTYIDIPETEFEIDSFVDACEWKASD
VRSGHFRLLRGWLQSLVQDTKLHLQNIHLHEPSRGKLTQYFAANKDKKRKLRRRESLQEQRTRMKGTFDR
DAEYVRALRRHLAFYPSARPVLSLSSGSWTLKLPFFQEVLGTSLKALYVIRDPRAWIYSILYSSRPSLYS
LKNVPEHLSKLFKIEAGKGKCNLDSGYAFEYESLRKELSKSNSNAVSLLSHLWLANTAAAMRINTDLLAA
SYQLVKFEDIVHFPQKTTERIFAFLGIPLSPASLNQILFATSTNLFYLPYEGEISPTNINVWKQNLPREE
IKVIENICWTLMARLGYPKFMN
>9402
MALMFTGHFLFLALVMFAFSTFEESVSNYSDWALFTDDIDQFKTQKVQDFRPNQKLKKSMLHPSLYFDAG
EIQAMRQKSRTSHLHLFRAIRSAVTVMLSNPTYYLPPPKHADFAAKWNEIYGNNLPPLALYCLLCPEDKV
AFEFVLEYMDRMVGYKDWLVENAPGDEVPVGHSLTGFATAFDFLYNLLDDHRRQKYLEKIWVITEEMYEY
SKVRSWGKQLLHNHQATNMIALLTGALVTGVDKGSEVNLWKQVVVDVMEKTMFLLNHIVDGSLDEGVAYG
SYTAKSVTQYVFLAQRHFNINNLDNNWLKMHFWFYYATLLPGFQRTVGIADSNYNWFYGPESQLVFLDKF
ILKNGAGNWLAQQIRRHRPKDGPMVPSTAQRWSTLHTEYIWYDPQLTPQPPSEYGTAKMYTFPNWGVVTY
GAGLPNTQTNTFVSFKSGKLGGRAVYDIVHFQPYSWIDGWRSFNPGHEHPDQNSFTFAPNGQVFVSEALY
GPKLSHLNNVLVFAPSPTSQCNKPWEGQLGECAQWLKWTSEEVGDAAGEIITASQHGEMIFVSGEAVSAY
SSAMKLRSVYRALLLLNSQTLLVVDHVERQADSPIKSVSAFFHNLDIDFKYIPYRFMNRYNGAMMDVWDA
HYKMFWFDDRGTSPVASIQEAEQAAEFKKRWTQFVNVTFQMESPITRIAYVFYGPYVNVSSCRFTDNSNS
GLQISLNVNNSEHVVSIVTDYRNLNTRFSYLGFGGFANVADQGQITRFGLGTQAIVKPVRHDQVIFPFGF
KFNIAIGLILCISLLILTFQWRFYLSFRKLMRWILTLVVALWFIELLDVWSTCTQPICAKWARTEAGPGT
QSLSSPGHHAYLPDVVIASLPGSGAEILKQLFFNSSDFLYIRVPTAYIDIPETEFEIDSFVDACEWKASD
VRSSHFRLLRGWLQSLVQDTKLHLQNIHLREPSRGKLAQYFTVNKDKKRKLRKRESLPEQRSRMKGAFDR
DAEYIRALRRHLVYYPGARPVLSLSSGSWTLKLRFFQEVLGTSLRALYIVRDPRAWIYSMLYSSKPSLYS
LKSIPERLAKLFKVDGGKGRCSLNSGYALEYEALRKELSKPKSDAVSLLSHLWLANTAAALRINTDLLHT
SYQLVKFEDIVHFPQKTTERIFAFLGIPLSPASLNQILFATSTNLFYLPYEGEISPSNTNVWKQNLPRDE
IKLIENICWTLMDRLGYPKFMD
>230844
MALMFTGHFLFLILMVFSFSTCEESVSNYSGWAVFTDDIQQFKNHKVQDFKPNQKLHPNLYFDSGDIQTM
RQKSRTSHLHLFRAIKSAVTIMLSNPTYYLPPPKHADFAAKWNEIYGNNLPPLALYCLLCPEDKVAFEFV
LEYMDRMVSYKDWLVENAPGDEVPVGHSLTGFATAFDFLYNLLSNHRKQKYLEKIRIVTEEMYEYSKIRS
WGKQLLHNHQATNMIALLIGALVAGVDKGSKTNIWKQDVVDVMEKTMFLLNHIVDGSLDEGVAYGSYTSK
SVTQYVFLAQRHFNINNLDNNWLKMHFWFYYATLLPGYQRTIGVADSNYNWFYGPESQLVFLDKFILRNG
AGNWLAQQIRKHRPKDGPMVPSTSQRWSTLHTEYIWYDPKLTPQPPVDFGTAKMHTFPNWGVVTYGAGLP
NTQTNTFVSFKSGKLGGRAVYDIVHFQPYSWIDGWRSFNPGHEHPDQNSFTFAPNGQVFVSEALYGPKLS
HLNNVLVFAPSPSSQCNKPWEGQLGECAQWLKWTGEEVGDAAGEVITASQHGEMMFVSGEAVSAYSSSMR
LKSVYRALLLLNSQTLLVVDHIERQETSPINLVSAFFHNLDIDFKYIPYRFMNRYNGAMMDVWDAHYKMF
WFDHHGNTPVANIQEAEQAAEFKKRWTQFVNVTFHMESTITRIAYVFYGPYINVSSCRFIDSSTSGLQIS
LNVNNTEHSVSVVTDYQNLKSRFDYLGFGGFASVANQGQITRFGLGTQAIVNPVRYDRVIFPFGFKFNIA
IGFILCISLVILTLQWWFYLSFRKLMRCVLMLVIALWFIELLDVWSTCTQPICAKWTRTETKANEKTIIS
EGKHIDLPDVVITSLPGSGADILKQLFFNSSDFLYIRIPTAYIDIPETELEIDSFVDACEWKVSDIHTGH
FRLLRGWLLSLVHDTKLHLQNIHLHETSRNKLVQYFAANKDKKRKLKRRESLQEQRSRMKGAFDRDAEYI
RALRRHLVYYPSARPVLSLSSGSWTLKLHFFQEVLGTSMRALYIVRDPRAWIYSMLYGSKPSLYSLKNVP
EHLAKLFKIEEGKSKCNFNSGYAFEYESLKKELETSQSNTVSLLSHLWLANTAAALRINTDLLPTSYQLV
KFEDIVHFPQKTTESIFAFLGIPLSPASLNQILFATSTNLFYLPYEGEISPSNTNIWKKNLPRDEIKLIE
NICWTLMDRLGYPKFMD
>74533
MALMFTGHVLFLALVMFAFSTFEESVSNYSDWAVFADDVDQFKTQKVQDFKPNQKLKKSMLHPSLYFDAG
EIQAMRQKSRTSHLHLFRAIRSAVTVMLSNPTYYLPPPKHADFAAKWNEIYGNNLPPLALYCLLCPEDKV
AFEFALEYMDRMVGYKDWLVENAPGDEVPVGHSLTGFATAFDFLYNLLDDHRRQKYLEKIGAVTEEMYEY
SKVRSWGKQLLHNHQATNMIALLTGALVTGVEKGSKANIWKQVVVDVMEKTMFLLNHIVDGSLDEGVAYG
SYTAKSVTQYVFLAQRHFSINNLDNNWLKMHFWFYYATLLPGFQRTVGIADSNYNWFYGPESQLVFLDKF
ILKNGAGNWLAQQIRRHRPKDGPMVPSTAQRWSTLHTEYIWYDPQLTPQPPAEYGTAKMHTFPNWGVVTY
GAGLPNTQANTFVSFKSGKLGGRAVYDIVHFQPYSWIDGWRSFNPGHEHPDQNSFTFAPNGQVFVSEALY
GPKLSHLNNVLVFAPSPTSQCNQPWEGQLGECGQWLRWTGEEVGDAAGEIITASQHGEMIFVSGEAVSAY
SSAMKLKSVYRALLLLNSQTLLVVDHVERQDGSPINSVSAFFHNLDIDFKYIPYRFMNRYNGAMMDVWDA
HYRMFWFDHHGNSPIASIQEAEQAAEFKKRWTQFVNVTFQMESTITRIAYVFYGPYVNVSSCRFVDNSNS
GLQISLNVNNTEHVVSIVTDYHNLKTRFDYLGFGGFANVADQGQITRFGLGTQAIAKPIKQDRVIFPFGF
KFNIAVGLILCISLVILTFQWRFYLSFRKLMRWILVLVVALWFIELLDVWSTCTQPICAKWARTEAEASP
KPLSSEGPHTDLPSVVVTSLPGSGAEILKQLFFNSSDFLYIRVPTTYIDIPETEFEIDSFVDACEWKASD
IHSVRFRLLRGWLQSLVQDTKLHLQNIHLHEPSRGKLAPYFTANKDKKRKLKRRESLPEQRSRMKGTFDR
DAEYIRALRRHLVYYPSARPVLSLSSGSWTLKLHFFQEVLGASMRALYIVRDPRAWIYSMLYSSKPSLYS
LKNVPEHLAKLFKIERGKGKCNLNSGYALEYESLRKELSKSQSNAVSLLSHLWLANTAAALRINTDLLPA
SYQLIKFEDIVHFPQKTTERIFAFLGIPLSPASLNQILFATSTNLFYLPYEGEISPTNTNVWKQNLPRDE
IRLIENICWTLMERLGYPKFTD
>8469
MALMFTVHILFLGLAMFALSTFEDSVSNYSDWVTFTENMDQYEKQKLQDFSADEKLKKAVLHPSLYFDAE
DIQALRQKSRTSHLHLFRAIRGAVTVMLSNPSYYLPPPKHADFAAKWNEIYGNNLPPLAFYCLLCPEDKA
AFDFVLEYMDRMAGYKDWLVENAPGDEVPLGHSLTGFATAFDFLYSSLDNIRRQKYLKKIWVVSEEMYEY
SKVRSWGKQLLHNHQATNMLALLTGALVTGVDKKSQTNIWKHAVVDVMEKTMFLLNHIVDGSLDEGVAYG
SYTAKSVTQYVFLAQRHFGINNLENNWLKMHFWFYYSTLLPGYRRTVGIADSNYNWFYGPESQLVFLDKF
VMKNGAGNWLAQQIRKHRPKDGPMVPSTAQRWSTLHTEYIWYAAELTPQPPPDYGTAKMHVFPNWGVVTY
GAGLPNTQTNTFVSFKSGKLGGRAVYDIVHFQPYSWIDGWRSFNPGHEHPDQNSFTFAPNGQVFVSEALY
GPKFSHLNNVLVFAPSPTSQCSQPWEGQLGECAQWLKWIGDEVGDSAGEIITASQYGEMMFVSGEAASAY
SSAMKLKSVYRALLLLNAQTLLVVDHIEKEKDSPLSSVSAFFHNLDIDFKYIPYKFMNKYSGAMMDVWDA
HYKMFWFDHHGSSPVARIQEAEQAAEFKKRWTQFINVTFPMKTTVTRIAYVFYGPYVNVSNCRFIDDSKY
GVQIFLNVNNSENIVSIVTEYHSLRTRFNYLGFGGFAKVADQNKVIKFGLGTEAVREQITNNRAIFPFGF
KINIIAGLVLGISLVILAFQWRFYISFSKLLRWILILVITLWFIELVDVWSTCTQPICAKWSSDIINVDP
DTGNTAKQLEGNPVVLPDVVITSLPSSGADILKQLFFNSSDFIYIRIPTTYLDIPETEFEMDSFVDACEW
KASDIQSGRFRLLRGWLQSLVQDTKLHLQNIHLHEASRSKLAQHPPLSKDKKRRSRKKESLSEQRSTTRG
RLDKDAEYIRELRRHLAYYPSARPVLSLSSGSWTLKLPFFQEIIGPSMRALYVVRDPRAWIYSMLYKSKP
SLYSLKNVPQHLAMLFKVEGGKEKCGLNSGYAFEYESLREELLDSRSNAVSVLSHLWLANTAAALRVNGD
LLQANYQLVKFEDIVSSPQKTAEAIYAFLGIPLSPASLNQILFATSTNLFYLPYEGEISPTSIHAWEQNM
PIEEVRLIEDICCTLMDRLGYPKFTV
>9755
MALMFTGHFLFLLLVMFACSTFEESVSNSSDWAVFPDDRDQLKTQKVRDFRPNQKLKKSMLHPHLYFDAG
EIQAMRQKSRTSHLHLFRAIRSAVTVMLSNPTYYLPPPKHADFAAKWNEIYGNNLPPLALYCLLCPEDKV
AFEFVLEYMDRMVGYKDWLVENAPGDEVPVGHSLTGFATAFDFLYNLLDDHRRQKYLEKIWVITEEMYEY
SKVRSWGKQLLHNHQATNMIALLTGALVTGVDKGSKVNLWKQVVVDVMEKMMFLLNHIVDGTLDEGVAYG
SYTAKSVTQYVFLAQRHFNINNLDNNWLKMHFWFYYATLLPGFQRTVGIADSNYNWFYGPESQLVFLDKF
VLKNGAGNWLAQQIRRHRPKDGPMVPSTAQRWSTLHTEYIWYDPQLTPRPPAEYGTAKMHTFPNWGVVTY
GAGLPNTQTNTFVSFKSGKLGGRAVYDIVHFQPYSWIDGWRSFNPGHEHPDQNSFTFAPNGQVFVSEALY
GPKLSHLNNVLVFAPSPTSQCNKPWEGQLGECAQWLKWTGEEAGDAAGEIITASQHEDMVFVSGEAASAY
SSAMRLKSVYRALLLLNSQTLLVVDHVERQEDSPIKSVSAFFHNLDIDFKYIPYRFMNRYNGAMMDVWDA
HYKMFWFDHRGSSPIARIQEAEQAAEFKKRWTQFVNVTFQMESTITRIVYVFYGPYVNVSSCRFIDNSKS
GLQISLNVNSTEHVVSVVTDYHNLRTRFDYLGFGGFASVADQVQITRFGLGTQAIVKPVRRDRVIFPFGF
KFNVAVGLILCVSLVILTFQWRFYLSFRKLVRWLLTLVIALWFVELVDVWSTCAQPICAKWARPEAQASA
KPVPPPGHRIDLPDIVITSLPGSGAEILKQLFFNSSDFLYIRVPAAYIDIPETDFEIDSFVDACEWKASD
VHGGHFRLLRGWLQSLVQDTKLHLQNIHLHEPSRGKLAQYFTTNKDKKRKLKRRESLPEQRSRMKGAFDR
DAEYIRALRRHLVRYPSARPVLSLNSGSWTLKLHFFHEVLGASMRALYVVRDPRAWIYSMLYSSKPSLYS
LKNVPEHLAKLFKIDGGKGKCNVNSGYASEYESLRKELAKSKPHAVSLLAHLWLANTAAALRINTDLLPT
SYQVIRFEDIVHFPQKTTERIFAFLGIPLSPASLNQILFATSTNLFYLPYEGEISPTNTNVWKQNLPRDE
IKLIESICWTLMARLGYPKFMD
>89462
MALMFTGHCLFLVLVMFAFSTLEESVSNYSDWAVFPDDIDPFKTQRVQDVRPNQKPKKSTLHPRLYFDAG
EIQAMRQKSRTTHLHLFRAIRSAVTAMLSNPTYYLPPPKHADFAAKWNEIYGNNLPPLALYCLLCPEDKV
AFEFALEYMDRMVGYKDWLVENAPGDEVPVGHSLTGFATAFDFLYNLLDGRRRQKYLEKIWVITEEMYEY
SKVRSWGKQLLHNHQATNMIALLTGALVTGVDKGTKVNLWKQVVVDVMEKTMFLLNHIVDGSLDEGVAYG
SYTAKSVTQYVFLAQRHFNINNLDNNWLKMHFWFYYATLLPGFQRTVGIADSNYNWFYGPESQLVFLDKF
VLKNGAGNWLAQQIRRHRPKDGPMVPSTAQRWSTLHTEYIWYDPQLTPQPPAEYGTAKMHMFPNWGVVTY
GAGLPNTQTNTFVSFKSGKLGGRAVYDIVHFQPYSWIDGWRSFNPGHEHPDQNSFTFAPNGQVFVSEALY
GPKLSHLNNVLVFAPSPTSQCNKPWEGQLGECAQWLKWTGEEVGDAAGEIITASQHGDMIFVSGEAVSAY
SSAMKLKSVYRALLLLNSQTLLVVDHVEKQEDSPIKSVSAFFHNLDIDFKYIPYRFMNRYNGALMDVWDA
HYKMFWFDHRGSSPLASIQEAEQAAEFKKRWTQFVNVTFQMESAITRIAYVFYGPYVNVSSCRFIDNSNS
GLQLSLNVNNTDHVVSIVTDYQNLKTRFDYLGFGGFATVADQAQVTRFGLGTEAIVKPIRHDRVIFPFGF
KFNVAVGLILCIGLVILTFQWRFYLSFRKLMRWILILVIALWSIELLDVWSACTQPICAKWARPETEATG
QALAPGGQRTDPPDIVITSLPGSGAELLKQLFFNSSDFLYIRVPTAYIDIPETELEIDSFVDACEWTASE
VHSVRFRLLRGWLQSLVRDTKLHLQNIHLHEPSRGKLAQYFTMNKDKKRKLKRRESLAEQRSRMKGAFDR
DAEYVRALRRHLVHYPSARPVLSLGSGSWTLKLHFFHEVLGASMRALYVVRDPRAWVYSMLYSSKPSLYS
LKNVQEHLAKLFKTEGSAGRCTLNSGYAVEYELLRKELLASRPHPVSLLAHAWLANTAAALRLNADLLPT
SYQLIKFEDLVHFPQNTTERIFAFLGIPLSPATLNQILFATSTNLFYLPYEGEISPANTNLWKRNLPKDE
IKLIENICWTLMDRLGYPKFMD
>310752
MALMFTGHFLFLLLVMFAFSTFEESVSNYSDWAVFPDDVDQLKTQKVQDFRPSQKLKKSMLHPHLYFDAG
EIQAMRQKSRTSHVHLFRAIRSAVTVMLSNPTYYLPPPKHADFAAKWNEIYGNNLPPLALYCLLCPDDRV
AFEFVLEYMDRMLGYKDWLVENAPGDEVPVGHSLTGFATAFDFLYNVLDDHRRQKYLEKIWVITEEMYEY
SKVRSWGKQLLHNHQATNMIALLTGALVTGADKGSQVNLWKRVVVDVMEKMMFLLNHIVDGTLDEGVAYG
SYTAKSVTQYVFLAQRHFNINNLDNNWLRMHFWFYYATLLPGFQRTVGIADSNYNWFYGPESQLVFLDKF
VLKNGAGNWLAQQIRRHRPKDGPMVPSTAQRWSTLHTEYIWYDPQLTPRPPAEYGTAKMHTFPNWGVVTY
GAGLPNTQTNTFVSFKSGKLGGRAVYDIVHFQPYSWIDGWRSFNPGHEHPDQNSFTFAPNGQVFVSEALY
GPKLSHLNNVLVFAPSPTSQCNKPWEGQLGECAQWLKWTGEEVGDAAGEIITASQHGDMVFVSGEAVSAY
SSAMKLKSVYRALLLLNSQTLLVVDHVERQEDSPIKSVSAFFHNLDIDFKYIPYRFMNRYNGAMMDVWDA
HYKMFWFDHRGSSPIASIQEAEQAAEFKKRWTQFVNVTFQMESTITRIVYVFYGPYVNVSSCRFIDNSNS
GLQISLNVNNTEHVVSIVTDYHNLKTRFDYLGFGGFASVADQVQITRFGLGTQAIVKPIRHDRVIFPFGF
KFNVAVGLILCISLVILTFQWRFYLSFRKLMRWILTLVIALWFVELVDVWSTCTQPICAKWARPEAEASA
KPVSPQGHRIYLPDIVITSLPGSGAEILKQLFFNSSDFLYIRVPTAYMDIPETDFEMDSFVDACEWKASD
VHGVHFRLLRGWLQSLVQDTKLHLQNIHLHEPSRGKLAQYLSTNKDKKRKLKRRESLPEQRSRMKGAFDR
DAEYIRALRRHLVHYPSARPVLSLTSGSWTLKLHFFHEVLGASMRALYVVRDPRAWIYSMLYSSKPSLYS
LKNVPEHLAKMFKIEGGKGKCNLNSGYASEYESLRKELSKSKPHAVSLLAHVWLANTAAALRINTDLLPT
SYQMIKFEDIVHFPQKTTERIFAFLGIPLSPASLNQILFATSTNLFYLPYEGEISPTNTNVWKQNLPRDE
IKLIENICWTLMDRLGYPKFMD
>176946
MALMFTGHSIFLALVMLAVSTFEESVSNYSDWVTFTDDVDQYEKQRLEGLGANQKMKKTVLYPNLYFSAE
EIPALRQKSHASHLHLFRAIRSAVSMMLSNPSYYLPPPKHADFAAKWNEIYGNNLPPLAFYCLLCPEDKA
AFDFVVEYMDRMAGYKNWLVENAPGDEVPLGHSLTGFATAFDFLYASLDDVRRQKYSAKIWAVTEEMFEY
SKVRSWGKQLLHNHQATNMLALLIGALVTGGGIESQANAWKHTVIDVMEKTMFLLNHIVDGSLDEGVAYG
SYTAKSITQYIFLAQRHFGINNLENHWLKMHFWFYYATLLPGFQRTVGIADSNYNWFYGPESQLVFLDRF
VLKNGVGNWLAQQIRKHRPKDGPMVPSTAQRWSTLHTEYIWYDPRLTPHPPPDYGKAKMHVFPNWGVVTY
GGGLPNTQTNTFVSFKSGKLGGRAVYDIVHFQPYSWIDGWRSFNPGHEHPDQNSFTFAPNGQVFVSEALY
GPKLSHLNNVLVFAPSPTSQCNQPWEGQLGECMQWLKWTGDEVGDASGEIITSSQHEEMMFVSGEAASAY
SSAMKLKSVYRSLLLLNPQTLLVVDHVEKEEDSPIDAISAFFHNLDIDFKYVPYKFMNKYNGAMMDVWDA
HYKMFWFDHRGSSPVARIQEAEQAAEFKKRWTQFVNVTFSTKSNIARIAYVFYGPYVNISSCRFIDDTQS
GYRISLNVNNTEIIYSVVTEYLNLWTRFRYLGFGGYATVTTPGKVMRFGLGTKMIEKQGLVHRPVFPFGF
KVNVIAGLVLGISLAILAFQWRFYISFGKLLRWILILVITLWFIELVDVWSSCTQLICAKWTSSMTNMEV
SEREDQGHPGSLPDVIITSLPSSGAEILKQLFFNSSDFVYIKIPTGYLDIPETEFDVDSFVDACEWKASD
VQSGRFRILQGWLHSLVKDTKLHLQNIHLHETSRSKLGQRSSTSRDRRRRPRKRESIVEQRNRLRISDKE
AEYIRELRQHLAFYPNARPVLSLSSGSWTIKLPFLQEVIGPSLRALYVVRDPRAWIYSMLYKNQPSLYSL
RKVPQHLTMLFKGDSREEKCGLNSGYAFEYEALREKLSASNSNAVSVMSHLWLANTAAALRVNRGLLPAN
YQLLKFEDIVNSPQKMAEAVYDFLGMPLAPASLNQILFATSTSLFYLPYEGEISPAGIHAWQHNMPPEEI
KQIEDICSTLMDHLGYPKFTDLKAAGQQ
>118797
MALMFTGHFLFLLLVMFAFSTFEESVSNYSDWAVFRDDIDQLKTQKVQDFRPNQKLKKSMLHPHLYFDAG
EIQAMRQKSRTSHLHLFRAIRSAVTVMLSNPTYYLPPPKHADFAAKWNEIYGNNLPPLALYCLLCPEDKV
AFEFVLEYMDRMVGYKDWLVENAPGDEVPVGHSLTGFATAFDFLYNLLDDHRRQKYLEKIWVITEEMYEY
SKVRSWGKQLLHNHQATNMIALLTGALVTGVDKGSKVNLWKQVVVDVMEKMMFLLNHIVDGTLDEGVAYG
SYTAKSVTQYVFLAQRHFNINNLDNNWLKMHFWFYYATLLPGFQRTVGIADSNYNWFYGPESQLVFLDKF
VLKNGAGNWLAQQIRRHRPKDGPMVPSTAQRWSTLHTEYIWYDPQLAPRPPAEYGTAKMHTFPNWGVVTY
GAGLPNTQTNTFVSFKSGKLGGRAVYDIVHFQPYSWIDGWRSFNPGHEHPDQNSFTFAPNGQVFVSEALY
GPKLSHLNNVLVFAPSPTSQCNKPWEGQLGECAQWLKWTGEEAGDAAGEIITASQHGDMVFVSGEAVSAY
SSAMKLKSVYRALLLLNSQTLLVVDHVERQEDSPIKSVSAFFHNLDIDFKYVPYRFMNRYNGAMMDVWDA
HYKMFWFDHRGSSPIASIQEAEQAAEFKKRWTQFVNVTFQMESTITRIVYVFYGPYVNVSSCRFIDNSNS
GLQISLNVNNTEHVVSIVTDYHNLKTRFDYLGFGGFASVADQVQITRFGLGTQAIVKPVRRDRVIFPFGF
KFNVAVGLILCISLVILTFQWRFYLSFRKLMRWILTLVIALWFVELVDVWSTCTQPICAKWARPEAEASA
KPVSPQGHRIDLPDIVITSLPGSGAEILKQLFFNSSDFLYIRVPTAYIDIPETDFEIDSFVDACEWKASD
VHGVHFRLLRGWLQSLVQDTKLHLQNIHLHEPGRGKLAPYFTTNKDKKRKLKRRESLPEQRSRMKGAFDR
DAEYIRALRRHLVHYPSARPVLSLNSGSWTLKLHFFHEVLGASMRALYVVRDPRAWIYSMLYSSKPSLYS
LRNVPEHLAKLFKIEGGKGKCNLNSGYASEYESLRKELSKSKPHAVSLLAHVWLANTAAALRINTDLLPT
SYQMIKFEDIVHFPQKTTERIFAFLGIPLSPASLNQILFATSTNLFYLPYEGEISPTNTNVWKQNLPRDE
IKLIENICWTLMDRLGYPKFMD
>48698
MAYMWVAHLLFLLPLLRVGTAFSGVFNTTDRDVFTDDSPRVKLERWKLHTADSHPNLYFNQADVLHLRQR
SSTTHSYIFKVIRAAVLTMLSNAPSYIPPAKHEEFTSKWNEIYGNNLPPLALYCLLCPEDSAALQFLLKF
MDRMANYPDWKVTSAPNDEVPTAHSLTGFATAYDFIYSFLDENRRDTYLKKIHSETEALYELSKFRAWGK
QYLQNHQTTNILAILTGAIVVGSHNDPESMIWKQVSVNYMEKTMFLLNHIVDGSLDEGVAYGSYTAKSIT
QYVFLAQRHFNIDNMQNNWLRGHFWFYYATLLPGFQRTVGIADSNYNWFYGPESQLAFLDTFVLKNGTGN
WLAQQIRKHRPKDGPMGQSSAQRWATLHTEYIWYNSHLTPQPPHDFGKARMHIFSNWGVVTYGAGLPAGQ
SNTFVSFKSGRLGGRAVYDIVHDKPYSWVDGWNSFNPGHEHPDQNSFTFAPNGQVFVSEALYGPKYSYLN
NVLVFSPSPTSQCNSPWEGQLGECAKWLRWTDEGVGDARGEVIVASEHRDTMFVSGEAVSAYSPAMRLKS
VFRALVLLNSQTLLVLDHVEKWADSPVKSLSAFFHNLDIDFKYVPFRFMDKYNGAMMDVWDAHYKMFWFD
SQGHSPETRIQEAEQAAEFKKRWTQYVNVTFPMTGAVSRVAYVFHGPYVKVSSCRFIDNSKNGVRLSLTI
NNTEKIVSIVTNYKDIGARLAYIGFGGHCKVEDRYQITRYGLGTQHIPKQISNDNQLFDIGFTLNVVAGV
VLCVAIGFLTMQRKFYVCFSRLMRYALLSVLVLWIVELLFVSNSCDQLLCGVKWKGADTKSEASKQIRLY
EQHRLPLPTVVITALPGSGSEILKYLFYNNSDFVYIRVPTEHVDIPETEFEFDSLVDTCEWSRTDALHGR
FKIIQSWLHSLVHNTKLHLQNIQLAEGSRAKQPQRASPSRDRKKRSRRREPASELKGRLKASLDRDTEYV
REMRRHVAEYPNAQVVLNMRSGSWTLKLPFIQEVVGISLRAVYLVRDPRAWIYLMVYNSKPSLYSLKNIP
QHLSLIFKEDSVRAGCPAIAPEFKTIQWLLSRSETNPILILAHLWLAHTVAALRVAETLPEDSYLRVRFE
DVVSFPQETAETIHTFLGVPMSPAALNQLTFTTSTNLYNLMYEGDISPANINIWRQKMPRKDVTLIEDIC
GGVMKRLGYARSAS
>9365
MAVMFTGHFLVLTLVLFAFSTFEESVSNYSDWAIFTDDLDQYKTQKVQELRPNPKPKKSMPHPSLYFDTG
EIHLLRHKSRTSHLHLFRAIRSAVTAMLSNPTYYLPPPKHEDFTAKWNEIYGNNLPPLALYCLLCPEDKV
ALDFILEYMDRMASYRDWLVENAPGDEVPMGHSLTGFATAFDFLYSLLDDHRRQRYLEKIWVITEEMYEY
SKVRSWGKQLLHNHQATNMMALLTGALVAGVDKGPKVQTWKQVAVDVMEKTMFLLNHVVDGSLDEGVAYG
SYTAKSVTQYVFLAQRHFNINNLDNHWLKMHFWFYYATLLPGFQRTVGIADSNYNWFYGPESQLVFLDKF
VLKNGAGNWLAQQIRKHRPKDGPMVPSTAQRWSTLHTEYIWYDPQLVPQPPADYGPPRMHVFPNWGVVTY
GAGLPNTQANTFVSFKSGKLGGRAVYDIVHFQPYSWIDGWRSFNPGHEHPDQNSFTFAPNGQVFVSEALY
GPKLSHLNNVLVFAPSPTSQCNQPWEGQLGECAQWLKWTGEEVGDAAGEVVTASQLGEMMFVSGEAVSAY
SSALKLRSVYRALLLLNSQTLLVVDHVERQSDSPVKSLSAFFHNLDIDFKYIPYKFMNRYHGAMMDVWDA
HYKMFWFDHRGNSPAASIQEAEQAAEFKKRWTQYVNVTFPMDSTITRVAYVFYGPYVNVSSCRFIDNSNS
GLQISLNVNNTEHVVSMVTDYLHLKARFNYLGFGGFASVADQGQITRFGLGTQAVMQPLRRERVIFPFGF
KFNIAVGLILCVSLVILTFQWRFYLSFRKLMRWILVLVIALWFVELLDVWSTCTQPICAKWARSTEAEAD
TGALPSGTHLPDVVITSLPGSGAEILKQLFFNSSDFLYIRVPTAYIEIPETELEIDTVVDACEWRAEDVP
GVRFRLLRGWLQSLVRDTKLHLQNIHLHEPSRGRLAQYLMTNKDKKRKLKRRESLPEQRSRMKGTFDRDA
EYIRALRRHLAIYPSARPVLSLSSGSWTLKLHLFQEVLGASMRALYVVRDPRAWIYSMLYSSKPSLYSLK
NVPEHLGRMFTRNGGKGRCHLNVAYASEYESLRKELTQPDAHAVSLLSHLWLANTAAALRINSALLPANY
QLIKFEDLVQLAQSTTERIFAFLGIPLSPASLNQILFATSTNLFYLPYEGEISPSSMHIWKQNLPREEIK
LIESICWPLMDRLGYPKLMD
>7868
MAQRNILIPILLLLVRGWAEEDSDHGVGVHHHHHHQPGGDLYHQQGDVYWERSGFSEDQQQQSGSPRAEP
PHPLLYFPPGEVGSLRQKARGSHSHLSKALRSAARDMVAKPTLYLPPDDPQLFAAKWNEVYGNNLGALAL
HCLLSPEDNAAWRLALQYMDKMAAYPRWQVRDAPNDEVPVAHSLTGFATAFDFLYPWLDEARRASYLEKI
RSVTMELYGFSKYRAWGKHFLHNHQTTNTLALLVGALVLAPHHPQSSLLCKQVAIDVMEKTLFLLDHVVD
GSLDEGVAYGSYTSKSITQYVFLALRHFHLNHTASPWLKQHFWFYYATVLPGFQRSVGIADSNYNWFYGP
ESQLVFLDRYVLRNGNGNWLAKQIRKHRPKDGPMEPSSAQRWCTLHTEYIWYDPQLTPQPPTGYGTPQLH
VFPNWGVATYGGGLPNTPDNTFVSFKSGKLGGRAVYDIVHSATYSWIDGWRNFNPGHEHPDQNSFTFAPN
GQVFVSEALYGPKYSYLNNVLVFAPSPTSQCNQPWEGQLGECGQWLRWTAGEAGDSAGELVSASQLGQMM
FVSGEASSSYSSALRLKSVYRALVLLNPQTLLVIDHVERSQGSPAQLVSAFFHNLDIDFKYVPYGGGGEK
GGASGGRLRGAMMDVWDAQYKMFWLDQRGNSPAASIQEAEQAAEFKKRWTQFVNVTFPLAGPLTRVAYVF
HGPRVKVTNLRFVDDSEHGVRVALTVNDTKTVVWVATQHSDPAARFTYLGFGGYAKVEEAGGVTTRFGLG
VGTGEGRASQRAAGVFFRFGWTAKALLGVAACAGLGLLAARWRLRVSSGKLLHLALLLLIALWFVELAVV
WSSCSPRPLCGVNWEPEQPQPQPEAQPGQWDERLAAFSPLVITSLPGSGAEILTQLFTNSTDFVYMRVPT
EHLDMPEVEFDFDSFVDACEWRLSEAQEGRYRLIQGWLQSLLHNTKLHLQDIQLHEVGRGGFGALGPGGD
RKWKPRRKKPPVPGLGHESAAGGAERDAENIRELRRHLAKYPNARVVLSLSSGSWTLKLPFVQGVVGPLM
KALYVVRDPRAWIYSLLYSSKPSLYALRNIPQHLALLFQQGSEQERCDKDSGYASEYEELRRELTSPGKT
AVSLLAHLWLANTRASLRINRKLPPASLHMLKFEDLVHFPQDTAEKIYAFLGFPLPPAVLNKVLFATTTN
LYHLPFEGEVSPVSINSWREKMSRKDIHTIEEICWPAMNLLDYSRLAG
>1230840
MALMFTGHFLFLALMMFGFSTFEESVSNYSEWAVFTDQIEQFKTQKVQDFRPSQKLKKNMLHPSLYFDAG
EIQVMRQKSHTSHLHLFRAIRSAVTVMLSNPTYYLPPPKHADFAAKWNEIYGNNLPPLALYCLLCPEDKV
AFEFVLEYMDRMVGYKDWLVENAPGDEVPVGHSLTGFATAFDFLYNLLDNHRRQKYLEKIWVITEEMYEY
SKVRSWGKQLLHNHQATNMIALLTGALVTGTDKGSKANIWKQIVVDVMEKTMFLLNHIVDGSLDEGVAYG
SYTSKSVTQYVFLAQRHFNINNLDNNWLKMHFWFYYATLLPGFQRTVGIADSNYNWFYGPESQLVFLDKF
ILRNGAGNWLAQQIRKHRPKDGPMVPSTAQRWSTLHTEYIWYDPQLTPQPPAEYGTAKLHTFPNWGVVTY
GAGLPNTQTNTFVSFKSGKLGGRAVYDIVHFQPYSWIDGWRSFNPGHEHPDQNSFTFAPNGQVFVSEALY
GPKLSHLNNVLVFAPSPSSQCNKPWEGQLGECAQWLRWTGEEVGDAAGEIITASQHGEMMFVSGEAVSAY
SSAMKLKSVYRALLLLNSQTLLVVDHIEKQEDSPINSVSAFFHNLDIDFKYIPYRFMNKYNGAMMDVWDA
HYKMFWFDHRGNSPIAGIQEAEQAAEFKKRWTQFVNVTFPMESTVMRIAYIFYGPYVNLSSCKFIDNSKS
GLQISLNVNNSEHVVSIVTDYHNLKTRFSYLGFGGYANVADQGQITRFGLGTQAIVKPVRRDRVIFPFGF
KFNIAVGLILCVSLVILAFQWQFYISFRKLMRWILILVIALWFIELLDVWSTCTQPICAKWTRTEAKASK
KTLSSEEHQVSLPDVVITSLPGSGAEILKQLFFNSSDFLYIRVPTAYIDIPETEFEIDSFVDACEWKVSD
IRSGHFRLLRGWLQSLVQDTKLHLQNIHLHEPSRGKLAQYFTTNKDKKRKLKRRESLQEQRSRMKGTFDR
DAEYIRALRRHLVSYPSARPVLSLSSGSWTLKLHFFQEVLGASLKALYVVRDPRAWIYSVLYSSKPSLYS
LKNVPVHLAKLFKIEGGKGKCNLNSGYAFEYESLRKELTKSRPNAVSLLSHLWLANTAAALRINTDLLPT
SYQLVKFEDIVHFPQKTTERIFAFLGIPLSPASLNQILFATSTNLFYLPYEGEISPTNINVWKQNLPRDE
IKLIENICWTLMDRLGYPKFMD
>60711
MPKGGAPPWIMALMFTGHLLFLVLLMFALSTFEESVSNYSEWAVFADDIDQFKTQKVQDFRPNQKLKKSM
LHPSLYFDAGEIQAMRQKSRTSHLHLFRAIRSAVTVMLSNPTYYLPPPKHADFAAKWNEIYGNNLPPLAL
YCLLCPEDKVAFEFVLEYMDRMVGYKDWLVENAPGDEVPIGHSLTGFATAFDFLCNLLDNHRRQKYLEKI
WVITEEMYEYSKVRSWGKQLLHNHQATNMIALLTGALVTGVDKGSKANIWKQAVVDVMEKTMFLLNHIVD
GSLDEGVAYGSYTAKSITQYVFLAQRHFNINNLDNNWLKMHFWFYYATLLPGFQRTVGIADSNYNWFYGP
ESQLVFLDKFILKNGAGNWLAQQIRKHRPKDGPMVPSTAQRWSTLHTEYIWYDPQLTPQPPAEYGTARIH
TFPNWGVVTYGAGLPNTQTNTFVSFKSGKLGGRAVYDIVHFQPYSWIDGWRSFNPGHEHPDQNSFTFAPN
GQVFVSEALYGPKLSHLNNVLVFAPSPSSQCNKPWEGQLGECAQWLKWTGEEVGDAAGEIITASQHGEMI
FVSGEAVSAYSSAMRLKSVYRALLLLNSQTLLVVDHIERQEDSPINSVSAFFHNLDIDFKYIPYKFMNRY
NGAMMDVWDAHYKMFWFDHHGNSPMASIQEAEQAAEFKKRWTQFVNVTFQMESAITRIAYVFYGPYINVS
SCRFIDSSDSGLQISLNVNNTEHVVSIVTDYHNLKTRFNYLGFCGFASVADQGQITRFGLGTQAIVKPVR
HDRIIFPFGFKFNIAVGLILCISLVILTFQWRFYLSFRKLMRWILILVIALWFIELLDVWSTCSQPICAK
WTRTEAEGSKKSLSSEGHHVDLPDVVITSLPGSGAEILKQLFFNSSDFLYIRVPTAYIDIPETEFEIDSF
VDACEWKVSDIRSGHFRLLRGWLQSLVQDTKLHLQNIHLHEPNRGKLAQYIAMNKDKKRKFKRRESLPEQ
RSQMKGAFDRDAEYIRALRRHLVYYPSARPVLSLSSGSWTLKLHFFQEVLGASMRALYIVRDPRAWIYSM
LYNSKPSLYSLKNVPEHLAKLFKIEGGKGKCNLNSGYAFEYEPLRKELSKSKSNAVSLLSHLWLANTAAA
LRINTDLLPTSYQLVKFEDIVHFPQKTTERIFAFLGIPLSPASLNQILFATSTNLFYLPYEGEISPTNTN
VWKQNLPRDEIKLIENICWTLMDRLGYPKFMD
>28377
MALLFTGHSLFLALAMLAVCTFEESVSNYSDWVTFTENVDQYEKQRLEDFKADQKMKRTIPHPSLYFSAE
EVPALRQKSHTSHLHLFRAIRSAVSVMLSNPSYYLPPLKHADFAAKWNEIYGNNLPPLAFYCLLCPEDKA
AFEFVLEYMDRLAGYKDWLVENAPGDEVPLGHSLTGFATAFDFLYSTLDDDRRQNYLAKILAVSEEMYEY
SKVRSWGKQLLHNHQATNMVALLIGALVTEGGIEAQANIWKHTVVDVMEKTMFLLNHIVDGSLDEGVAYG
SYTSKSITQYIFLAQRHFGINNFENHWLKMHFWFYYATLLPGFQRTVGIADSNYNWFYGPESQLVFLDRF
VLKNGIGNWLAQQIRKHRPKDGPMVPSTAQRWSTLHTEYLWYDPGLTPHPPPDYGSAKMHVFPNWGVVTY
GAGLPYGQTNTFVSFKSGKLGGRAVYDIVHFQPYSWIDGWRSFNPGHEHPDQNSFTFAPNGQVFVSEALY
GPKLSHLNNVLVFAPSPTSQCNQPWEGQLGECTQWLKWTGDEVGDAAGEIITSSQHEDMMFVSGEAASTY
SSAMKLKSVYRSLLLLNHQTLLVVDHVEKEVDSPINSISAFFHNLDIDFKYVPYKFMNKYNGAMMDVWDA
HYKMFWFDHHGSSPVARIQEAEQAAEFKKRWTQFVNVTFSAKSTTARIAYVFYGPYVNVSSCRFVDDAQA
GFRISLNVNNTETVFSVVTDYLNLGTRFNYLGFGGYAKVTTQGKVTRFGLGTEAVKKQALNNKTVFPFGF
KVNIIAGLILGISLVILAIQWRFYISFGKLLRWTLILVILLWFVELIDVWSSCTQPICAKWSSDVASTEG
NAEKDQGHPVTLPDIVITSLPNSGAEILKQLFFNSSDFIYIRIPTGYLDVPETEFEIDSFVDACEWKASD
VQSGHFRLLQGWLHSLVKDTKLHLQNIHLHEPSRSKSAQHPSPSKDKKRRPRKRESIAEQRTRLRGSSDK
EAEYIRDLRRHLAFYPNARPVLSLSSGSWTLKLPFFQEIIGLSLRALYVVRDPRAWVHSILYKSQPSLYS
LRKVPQRLARLFKPDGKRKDKCHLNSGYALEYEPLREELSHSNSNAVSVMSHLWLANTAAALRLNGDLLP
ANYRLLKFEDIVNFPHKVAEAVYAFLGIPLSPASLNQILFATSTNLFYLPYEGEVSPVSIHAWRHDLPLE
EIKLIEDICSTLMDRLGYPKFTDLDAAGQQ
>1868482
MPKEGTPPWIMALMFTGHFLFLALLMFGFSTFEESVSNYSEWAVFTDDIDQFKTQKVQDFRPNQKPKKSM
LHPGLYFDAGDILALRQKSRTSHLHLFRAIRSAVTVMLSNPTYYLPPPKHADFAAKWNEIYGNNLPPLAL
YCLLCPEDKVAFEFVLEYMDRMVGYKDWLVENAPGDEVPVGHSLTGFATAFDFLYNLLDNHRRQKYLEKI
WVITEEMYEYSKVRSWGKQLLHNHQATNMIALLTGALVSGVDKGSKANIWKQVVVDVMEKTMFLLNHIVD
GSLDEGVAYGSYTAKSITQYVFLAQRHFNINNLQNNWLKMHFWFYYATLLPGFQRTVGIADSNYNWFYGP
ESQLVFLDKFILKNGAGNWLAQQIRKHRPKDGPMVPSTAQRWSTLHTEYIWYDPQLTPQPPAEYGTAKMH
TFPNWGVVTYGAGLPNTQTNTFLSFKSGKLGGRAVYDIVHFQPYSWIDGWRSFNPGHEHPDQNSFTFAPN
GQVFVSEALYGPKLSHLNNVLVFAPSPSSQCNKPWEGQLGECAQWLKWTGEEVGDAAGEIITASQHGEMI
FVSGEAVSAYSSTMRLKSVYRALLLLNSQTLLVVDHIERQEDSPINSVSAFFHNLDIDFKYIPYRFMNRY
NGAMMDVWDAHYKMFWFDHHGSSPLASIQEAEQAAEFKKRWTQFVNVTFQMESKITRIAYVFYGPYVNVS
SCSFIDNSNSGLQISLNVNNTEHVVSIVTDYHNLKTRFSYLGFGGFANVADQDQITRFGLGTQAIVKPVR
HDRVIFPFGFKFNIAVGLILCVSLVILTFQWRFYLSFRKLMRWILTLVIALWFIELLDVWSTCTQPICAK
WTRTEASKKPSSSEGHHIDLPDVVITSLPGSGAEILKQLFFNSSDFLYIRVPTAYIDIPETEFEIDSFVD
ACEWKVSDIRSGHFRLLRGWLQSLVQDTKLHLQNIHLHEPSRGKLAQYFTMNKDKKRKLKRRESLPEQRN
RMKGAFDRDAEYIRALRRHLVYYPSARPVLSLSSGSWTLKLHFFQEVLGASMRALYVVRDPRAWIYSMLY
SSKPSLYSLKNVPEHLAKLFKIEGGKGKCNSNSGYAFEYEPLRKELSKSKPNAVTLLSHLWLANTAAALR
INTDLLPTSYQLVKFEDIVHFPQKTTERIFTFLGIPLSPAGLNQILFATSTNLFYLPYEGEISPINTNIW
KQNLPRDEIKLIENICWTLMDHLGYPKFMD
>29078
MALMFTGHFLFLALVMFAFSTFEESVSNYSDWAVFADDIDQFKTQKVQDFRSNQKLKKSMLHPSLYFDAG
EIQAMRQKSRTSHLHLFRAIRSAVTVMLSNPTYYLPPPKHADFAAKWNEIYGNNLPPLALYCLLCPEDKV
AFEFVLEYMDRMVGYKDWLVENAPGDEVPVGHSLTGFATAFDFLYNLLDDHRRQKYLEKIWVVTEEMYEY
SKVRSWGKQLLHNHQATNMIALLTGALVTGVEKESKVNLWKQVVVDVMEKTMFLLNHIVDGSLDEGVAYG
SYTAKSVTQYVFLAQRHFNINNLDNNWLKMHFWFYYATLLPGFQRTVGIADSNYNWFYGPESQLVFLDKF
ILKNGAGNWLAQQIRRHRPKDGPMVPSTAQRWSTLHTEYIWYDPQLTPQPPAEYGTAKMHTFPNWGVVTY
GAGLPNTQTNTFVSFKSGKLGGRAVYDIVHFQPYSWIDGWRSFNPGHEHPDQNSFTFAPNGQVFVSEALY
GPKLSHLNNVLVFAPSPTSQCNKPWEGQLGECAQWLKWTSEEVGDAAGEIITASQNGEMIFVSGEAVSAY
SSAMKLKSVYRALLLLNSQTLLVVDHIEKQDDSPIKSVSAFFHNLDIDFKYIPYRFMNKYNGAMMDVWDA
HYKMFWFDHHGSSPVASIQEAEQAAEFKKRWTQFVNVTFQMESTITRIAYVFYGPYVNVSSCRFTDNSNS
GLQISLNVNNTEHVVSIVTDYYNLNTRFNYLGFGGFANVADQGQITRFGLGSQAIVRPVRQDKVIFPFGF
KFNIAIGLILCIGLLILTFQWRFYLSFRKLMRWILILVVVLWFIELLDVWSTCTQPICAKWARTEVEASA
TSVSSQGHHVDRPDVVITSLPGSGAEILKQLFFNSSDFLYIRVPTAYIDIPETEFEIDSFVDACEWKASD
IHSVHFRLLRGWLQSLVQDTKLHLQNIHLHESSRGKLAQYFTVNKDKKRKPKRRESLSEQRSRMKGAFDR
DAEYIRALRRHLVYFPSARPVLSLSSGSWTLKLHFFQEVLGSSLRALYVVRDPRAWIYSMLYSSKPNLYS
LKNIPERLAKLFKVEGGKGKCSLNSGYALEYESLRKELSKPKSNAVSLLSHLWLAHTAAALRINTDLLPT
SYQLIKFEDIVHFPQKTTERIFAFLGIPLSPASLNQILFATSTNLFNLPYEGEISPSNTNVWKQNLPRDK
IKQIENICWTLMDRLGYPKFMD
>144197
MCAQTPGNMAGNWVVYPLFLLPLFAVGTAFSGVFNATDRDIFTDDLLQVKLTQDRATEQWKLQSADSHPN
LYFNQVDVLHLRQRSSTTHSHIFKVIRAAVLTMLSNVPFYMPPVKHEEFTSKWNEIYGNNLPPLALYCLL
CPEDSAALQFLIKFMDRMAEYPDWKVTSAPNDEVPMAHSLTGFATAYDFIYSYLDKRRRDVYLKKIHSQT
EELYELSKYRGWGKQYLQNHQTTNILAVLTGAIVVGSHDNPESMIWKQVAVNYMEKTMFLLNHVVDGSLD
EGVAYGSYTAKSITQYVFLAQRHFNIDNMQNNWLRGHFWFYFATLLPGFQRTVGIADSNYNWFYGPESQL
VFLDTFVMRNGTGNWLAQQIRKHRPKDGPMGQSSAQRWATLHTEYIWYNSHLTPQPPHEFGKARMHIFSN
WGVVTYGAGLPNGQSNTFVSFKSGRLGGRAVYDIVHDKPYSWVDGWNSFNPGHEHPDQNSFTFAPNGQVF
VSEALYGPKYSYLNNVLVFSPSPTSQCNSPWEGQLGECAKWLRWTDEGVGDARGEVIVASSHRDTMFVSG
EAVAAYSPAMRLKSVFRALVLLNSQTLLVLDHVEKWADSPVTSLSAFFHNLDIDFKYVPFRFMDRYNGAM
MDVWDAHYKMFWFDSQGHSPDTRIQEAEQAAEFKKRWTQYVNVTFQMTGTVSRVAYVLHGPYVKVSNCRF
MDNSKNGVRLSLTINNTEKIVSIATNYKDIGARMTYLGFGGHSKVEDRYQITRYGLGTQLIPKQINTDNQ
LFDFGFTVNVIAGVVLCVAIGFLTMQRKFYVCFSRLMRYALLSVLILWIAELLFVSNSCDQLLCGVKWKG
AGAKSEVNKQIRLYEQHRLPLPTVVITTLPGSGSEILKHLFYNSSDFVYIRVPTEHVDIPETEFEFDSLV
DACEWSRSDAVHGRFKIIQGWLHSLVHNTKLHLQNIQLAEGSRVKLPQRATPSRDRKKRSRRREPSAELK
GKLRASLDRDAEYVREMRRHVAEYPNARVVLNMRSGSWALKLPFIQEVVGPSLRTIYLVRDPRAWIYLMV
YNSKPSLYSLKNIPQHLSLIFKEDAVRDGCPAVAPEFKIIQRLLSRSETNPVLILAHLWLAHTAAVLRVS
EGLPEESYLQVRFEDVVNFPQETAETIHTFLGVPVSPAALNQLIFTTSTNLYNLMYEGDISPANINMWRQ
KMPRKDIRLIEDVCGSVMKGLGYTRFAS
>244447
MQFKMAFNWVLHAVFLLPLLAVASAFSGVFNTTDRDMFTDDLLQVTLTQDRASEQWKLHSVVDSHPNLYF
NQADVPHLRQRSTTTHSHIFKVIRAAVLTMLANVPFYIPPVKHEEFTSKWNEIYGNNLPPLALYCLLCPE
DSAALQFLIRFMDRMADYPDWKVTSAPNDEVPMAHSLTGFATAYDFIYSQLDERRRSFYLKKIRSETVEL
YELSKYRGWGKQYLQNHQTTNILAILTGAIVVGSHDDPESMLWKQVAVNYMEKTMFLLNHIVDGSLDEGV
AYGSYTAKSITQYVFLAQRHFSIDNTQNNWLQGHFWFYYATLLPGFQRTVGIADSNYNWFYGPESQLVFL
DTFVIRNGTGNWLAQQIRKHRPKDGPMGQSSAQRWATLHTEYIWFNPHLTPQPPHDFGRARMHIFSNWGV
VTYGAGLPNGQGNTFVSFKSSRLGGRAVYDIVHDKPYSWVDGWNSFNPGHEHPDQNSFTFAPNGQVFVSE
ALYGPKYSYLNNVLVFSPSPTSQCNNPWEGQLGECGKWLRWTDEGVGDARGEVIVASSHRDTMFVSGEAV
SAYSPAMRLKSVFRALVLLNSQTLLVVDHVEKSEQSPLKYFSTFFHNLDIDFKYVPFRFMDRFNGAMMDV
WDAHYKMFWFDTQGHSPDTRIQEAEQAAEFKKRWTQYVNVTFPMTGTVSRVAYVLHGPYVKVSNCKFIDN
GKNGVRLSLIINNTEKIVSIATNYKDIGARLSYLGFGGHCKVEDGYQITRFGLGTQLIPKQISADNQLFD
FGFAVNVIAGVVLCVAIGFLTMQRKFYVCFSRFMRYALLSVLILWIAELLFVSNSCDQLLCGVKWKGAGA
RSEVNKQIRLYEQHRLPLPTVVITTLPGSGSEILKHLFYNNSDFLYIRVPTEHVDIPETEFEFDSLVDAC
EWSRLDAVNGRFKIIQGWLHSLVHNVKLHLQNIQLVESSRVKQPQRVTTSRDRKKRSRRREQTSELKGKL
RASLDRDAEYVREMRHHIAQYPDARVVLSMRSGSWAIKLPFIQEVVGTSLRSIYLVRDPRAWIYLMLYNS
KPSLYSLKNIPQHLSLIFKEDTVKDGCPSVAPEFKIIQRLLSRSETNPVLILAHLWLAHTAAVLRVSESL
PEESYLQVRFEDVVNFPQETAETIHEFLGVPVSPAALNQLIFTTSTNLYNLMYEGDISPSNINMWRRNMP
RRDIRLIEDVCLSVMKRLGYVRFGS
>8081
MAYMWVAHLLFLLPLLRVGTAFSGVFNTTDRDVFTDDLPRVKLERWKLHSADSHPSLYFNQADVLHLRQR
SSTTHSYIFKVIRAAVLTMLSNAPSYIPPAKHEEFTSKWNEIYGNNLPPLALYCLLCPEDSAALQFLLKF
MDRMANYPDWKVTSAPNDEVPTAHSLTGFATAYDFIYSFLDESRRDAYLKKIRSETEALYELSKYRAWGK
QYLQNHQTTNILAILTGAIVVGSHNDPESMIWKQVSVNYMEKTMFLLNHIVDGSLDEGVAYGSYTAKSIT
QYVFLAQRHFNIDNMQNNWLRGHFWFYYATLLPGFQRTVGIADSNYNWFYGPESQLAFLDTFVLKNGTGN
WLTQQIRKHRPKDGPMGQSSAQRWATLHTEYIWYNSHLTPQPPHDFGKARMHIFSNWGVVTYGAGLPAGQ
SNTFVSFKSGRLGGRAVYDIVHDKPYSWVEGWNSFNPGHEHPDQNSFTFAPNGQVFVSEALYGPKYSYLN
NVLVFSPSPTSQCNSPWEGQLGECAKWLRWTDEGVGDARGEVIVASEHRDTMFVSGEAVSAYSPAMRLKS
VFRALVLLNSQTLLVLDHVEKWADSPVKSLSAFFHNLDIDFKYVPFRFMDKYNGAMMDVWDAHYKMFWFD
SQGHSPETRIQEAEQAAEFKKRWTQYVNVTFPMTGAVSRVAYVLHGPYVKVSSCRFIDNSKNGVRLSLTI
NNTEKIVSIVTNYKDIGARLTYIGFGGHCKVEDRYQITRYGLGTQHIPKQISNDNQLFDIGFTLNVVAGV
VLCVAIGFLTMQRKFYVCFSRLMRYALLSVLVLWIVELLFVSNSCDQLLCGVKWKGADTKSEASKQIRLY
EQHRLPLPTVVITALPGSGSEILKHLFYNNSDFVYIRVPTEHVDIPETEFEFDSLVDTCEWSRTDAVHGR
FKIIQSWLHSLVHNTKLHLQNIQLAEGSRVKQPQRASPSRDRKKRSRRREPASELKGRLRASLDRDAEYV
REMRRHVAEYPNAQVVLNMRSGSWTLKLPFIQEVVGISLRAVYLVRDPRAWIYLMVYNSKPSLYSLKNIP
QHLSLIFKEDSVRGGCPAIAPEFKTIQWLLSRSETNPILILAHLWLAHTAASLRVAESLPEDSYLRVRFE
DVVSFPQETAETIHTFLGVPMSPAALNQLTFTTSTNLYNLMYEGDISPANINIWRQKMPRKDVRLIEDIC
GGVMKRLGYARSAS
>9244
MALMFMGHTLFLALMMFAVLTFEESVSNYSDWVTFIEKVDQYEKQQPEHLDAEQKLKKTVLHPSLYFNAE
DVQALRLKAHTSHSHLFRAIRNAVTIMLSNPLYYLPPPKHVDFSAKWNEIYGNNLPPLAFYCLLCPEDKA
AFDFVLEYMDRMAGYKNWLVENAPGDEVPLGHSLTGFATAFDFLYNSLENETRQKYLEKIWSVSEEMYEY
SKVRSWGKQLLHNHQATNMLALLIGALVAGVDKGSQANIWKHTVVDVMEKTMFLLNHVVDGSLDEGVAYG
SYTAKSVTQYVFLAHRHFGINNLENNWLKMHFWFYYATLLPGFQRTVGVADSNYNWFYGPESQLVFLDKF
IMKNGAGNWLAQQIRKHRPKDGPMVPSTAQRWSTLHTEFIWYAAEITPQPPPGYGTAKMHVFPNWGVVTY
GAGLPNSQTNTFVSFKSGKLGGRAVYDIVHFQPYGWIDGWRSFNPGHEHPDQNSFTFAPNGQVFVSEALY
GPKLSHLNNVLVFAPSPTSQCNQPWEGQLGECAQWLKWIGDEVGDSAGEIITASQAGDMMFVSGEAVSAY
TSAMKLKSVYRVLLLLNSQTLLVVDHIEKEEDSPVNSVSAFFHNLDIDFKYVPYKFKNKYNGAMMDVWDA
HYKMFWFDHHGSSPVARIQEAEQAAEFKKRWTQFVNVTFPMKNTLTRIVYLFHGPYVNVSNCRLIDNAKS
GFQISLSVNNTESTISVVTEYQNLKTRFDYLGFGGFAKVVHENEVTKFGLGTEFVEKQIKNNRAVFPFGF
KVNIVAALILGVSLVILAFQWRFYVSFSKMLRWILILVVTLWLIELVDVWSMCTQPICAKWSSDMTRLEN
GKGNKAKQLEGNPVVLPDVIITSLPASGAEILKQLFFNSSDFLYVRIPTPYLEIPETEFEIDSFVDPCEW
KISDVQNGHFRLIQGWLQSLVRGTKLHLQNIHLYEASRSKIAQNSAIIKDKKKRSKKRESLSEQRSRVRG
SKDKEAEYIRELRRHLIDYPNARPVLSLSSGSWTLKLPFFQEILGPSMRALYVVRDPRAWIYSMLYKNKP
SLYSLKNVPQHLAAMFKGENGKGKCSVNEGYAFEYELLRKEFSSANSNAVSVLSHLWLANTAAALRINAA
LQPTNYLLVKFEDIVSFPQKTAETIFAFLGIPLPPSSLNQILFATSTSLFYLPYEGEISPSSIHAWKQNM
PNEEIRRIEDICCSLMDHLGYPKFME
>9798
MALMFTGHFLFLVLAMFAFSTFEESVSNYSDWAVFTDDIDQFKTQKVQDFRPNQKLKKSLLRPSLYFDAG
EIQAMRQKSRTSHLHLFRAIRNAVTVMLSNPTYYLPPPKHADFAAKWNEIYGNNLPPLALYCLLCPEDKV
AFEFVLEYMDRMVGYKDWLVENAPGDEVPVGHSLTGFATAFDFLYNLLDGHRRQKYLEKIWIITEEMYEY
SKVRSWGKQLLHNHQATNMIALLTGALVTGVDKGSKVNLWKQVVVDVMEKTMFLLNHIVDGSLDEGVAYG
SYTAKSVTQYVFLAQRHFNINNLDNNWLKMHFWFYYATLLPGFQRTVGIADSNYNWFYGPESQLVFLDKF
ILKNGAGNWLAQQIRRHRPKDGPMVPSTAQRWSTLHTEYIWYDPQLTPQPPAEYGTAKMHIFPNWGVVTY
GAGLPNTQTNTFVSFKSGKLGGRAVYDIVHFQPYSWIDGWRSFNPGHEHPDQNSFTFAPNGQVFVSEALY
GPKLSHLNNVLVFAPSPTSQCNNPWEGQLGECAQWLKWTGEEVGDAAGEIITASQHGEMIFVSGEAVSAY
SSAMKLKSVYRALLLLNSQTLLVVDHIEKQEDSPIESVSAFFHNLDIDFKYIPYRFMSRYNGAMMDVWDA
HYKMFWFDHHGNSPIASIQEAEQAAEFKKRWTQFVNVTFQMESRITRIAYVFYGPYVNVSSCRFIDNSDS
GLQISLNVNNTEQVVSIVTDYHNLKTRFDYLGFGGFANVADQGQITRFGLGTQAIVKPRRHDRVIFPFGF
KFNIAVGLILCISLVILTFQWRFYLSFRKLMRWILILVIALWFIELLDVWSTCTQPICAKWARTEAEASA
KTSSSEGHHIDLPDVVITSLPGSGAEILKQLFFNSSDFLYIRVPTAYIDIPETEFEIDSFVDACEWKASD
IRTMHFRLLRGWLQSLVQDTKLHLQNIHLHEPSRAKLAQYFTMNKDKKRKLKRRESLPEQRSRMKGAFDR
DAEYIRALRRHLVYYPSARPVLSLSSGSWTLKLHFFQEVLGASMRALYIVRDPRAWIYSMLYSSKPSLYS
LKNVPGHLAKLFKIEGGKGKCNLNSGYALEYESLRKELSKSTSSAVSLLAHLWLANTAAALRINTDLLPA
SYQLIKFEDIVHFPQKTTERIFAFLGIPLSPASLNQILFATSTNLFYLPYEGEISPTNINVWKQNLPRDE
VKLIESICWTLMDHLGYPKFVD
>482537
MALMFSGHFLFLTLVTFGFSTFEESVSNYSEWAVFTDDIGQFKMQKVQDFRPNPKLKKSMLHPSLYFDTG
EIQAMRQKSRTSHLHLFRTIRSAVTVMLSNPTYYLPPPKHADFAAKWNEIYGNNLPPLALYCLLCPEDKV
AFEFVLEYMDRMVGYKDWLVENAPGDEVPIGHSLTGFATAFDFLYNLLDNHRRQKYLEKIWVITEEMYEY
SKVRSWGKQLLHNHQATNMIALLTGALVTGVDKGSKANVWKQVVVDVMEKTMFLLNHIVDGSLDEGVAYG
SYTAKSVTQYVFLAQRHFNINNLDNNWLKMHFWFYYATVLPGFQRTVGIADSNYNWFYGPESQLVFLDKF
ILKNGAGNWLAQQIRKHRPKDGPMVPSTAQRWSTLHTEYIWYDPQLTPQPPAEYGTAKMHMFPNWGVVTY
GAGLPNTQTNTFVSFKSGKLGGRAVYDIVHFQPYSWIDGWRSFNPGHEHPDQNSFTFAPNGQVFVSEALY
GPKLSHLNNVLVFAPSPSSQCNKPWEGQLGECAQWLKWTGEEVGDAAGEIITASQHGEMIFVSGEAVSAY
SSAMRLKSVYRALLLLNSQTLLVVDHIEKQEDSPINSVSAFFHNLDIDFKYIPYRFMNKYNGAMMDVWDA
HYKMFWFDHHGNSPVASIQEAEQAAEFKKRWTQFVNVTFQMESTITRIAYVFYGPYVNVSSCRFIDNSNS
GLQISVNVNNTEQVVSIVTDYHNLQTRFNYLGFGGFANVADQGRITRFGLGTQTIVKPVRQDRVIFPFGF
KFNVAVGLILCISLVILTFQWRFYLSFRKLMRWILILVIALWFIELLDVWSTCTQPICAKWTKTKVETSK
KSLSFEGHHVDLPDVVITSLPGSGAEILKQLFFNSSDFLYIRVPTAYIDIPETEFEIDSFVDACEWKVSE
IQSGHFRLLRGWLQSLVQDTKLHLQNIHLHEPSRNKLAQYFAMNKDKKRKLKRRESLPEQKSRMKGAFDR
DAEYIRALRRHLVYYPSARPVLSLSSGSWTLKLHFFQEVLGASMRALYVVRDPRAWVYAMLYSSKPSLYS
LKNVPEHLAKLFKIERGKSKCNLNSGFAFEYEPLRKELSKSRSSAVSLLSHLWLANTAAALRINTDLLPT
SYQLVKFEDIVHFPQRTTERIFAFLGIPLSPASLNQILFATSTNLFYLPYEGEISPSNTNIWKQNLPRDE
IKLIENICWTLMDRLGYPKFMD
>29073
MALMFTGHFLFLALVMFAFSTFEESVSNYSDWAVFTDDIDPFKTQKVQDFKPNQKPKKSMLHPSLYFDAG
EIQAMRQKSRTSHLHLFRAIRSAVTVMLSNPTYYLPPPKHADFAAKWNEIYGNNLPPLALYCLLCPEDKV
AFEFVLEYMDRMVGYKDWLVENAPGDEVPVGHSLTGFATAFDFLYNLLDDHRRQKYLEKIWAVTEEMYEY
SKVRSWGKQLLHNHQATNMIALLTGALVTGVDKGSKANIWKQVVVDVMEKTMFLLNHIVDGSLDEGVAYG
SYTAKSVTQYVFLAQRHFNINNLDNNWLKMHFWFYYATLLPGFQRTVGIADSNYNWFYGPESQLVFLDKF
ILKNGAGNWLAQQIRRHRPKDGPMVPSTAQRWSTLHTEFIWYDPQLTPQPPAEYGTAKMHTFPNWGVVTY
GAGLPNTQTNTFVSFKSGKLGGRAVYDIVHFQPYSWIDGWRSFNPGHEHPDQNSFTFAPNGQVFVSEALY
GPKLSHLNNVLVFAPSPTSQCNKPWEGQLGECAQWLKWTGEEAGDAAGEIITASQHGEMIFVSGEAVSAY
SSAMKLKSVYRALLLLNSQTLLVVDHVERQDNSPIKSVSAFFHNLDIDFKYIPYRFMNRYNGAMMDVWDA
HYRMFWFDHRGNSPIASIQEAEQAAEFKKRWTQFVNVTFQMESTITRIAYVFYGPYVNVSSCRFIDNSNS
GLQISLNVNNTEHVVSVVTDYHNLKTRFDYLGFGGFANVADQGQITRFGLGTQAIAKPIRQDRVIFPFGF
KFNIAVGLILCISLVILTFQWRFYLSFRKLMRWILILVIALWFIELLDVWSTCTQPLCAKWARTEAEASP
KSLSSEGHHLDLPDVVITSLPGSGAEILKQLFFNSSDFLYIRVPTTYIDIPDTEFEIDSFVDACEWKASD
IHSVHFRLLRGWLQSLVQDTKLHLQNIHLHEPSRGKLAQYFTANKDKKRKLKRRESLPEQKSRMKGTFDR
DAEYIRALRRHLVYYPSARPVLSLSSGSWTLKLHFFQEVLGASMRALYIVRDPRAWIYSMLYSSKPSLYS
LKNVPEHLAKLFKVDGGKGKCNLNSGYAVEYESLRKELSKSKSSAVSLLSHLWLANTAAALRINTDLLPT
SYQLIKFEDIVHFPQKTTERIFAFLGIPLSPASLNQILFATSTNLFYLPYEGEISPTNTNVWKQNLPRDE
IKLIENICWTLMERLGYPKFMD
>1026970
MPKESSSPWIMAVMFTGHFLFLTLVVFPFSTCEESVSNYSEWAVFTEDIEQFKTQKVQDLRLNQKLHPRL
YFDAGEIQAMRQRSRTSHLHLFRAIRNAVTIMLSNPTYYLPPPKHVDFAAKWNEIYGNNLPPLALYCLLS
PEDKVAFEFVLEYMDRMVGYKDWLVENAPGDEVPVGHSLTGFATAFDFLYNLLDNHRKQKYLEKIWIVTE
EMYEYSKIRSWGKQLLHNHQATNMIALLIGALVTGVDKGSKANIWKQVVVDVMEKTMFLLNHVVDGSLDE
GVAYGSYTSKSVTQYVFLAQRHFNINNLDNNWLKMHFWFYYGTLLPGYQRTVGIADSNYNWFYGPESQLV
FLDKFILKNGAGNWLAQQIRKHRPKDGPMVPSTAQRWSTLHTEYIWYDPKLTPQPPVEYGTAKMHTFPNW
GVVTYGAGLPNTQTNTFVSFKSGKLGGRAVYDIVHFQPYSWIDGWRSFNPGHEHPDQNSFTFAPNGQVFV
SEALYGPKLSHLNNVLVFAPSPSSQCNKPWEGQLGECAQWLKWTGEEVGDAAGEIITASQHGEMMFVSGE
AVSAYSSAMRLKSVYRALLLLNSQTLLVVDHIERQEASPINSVSAFFHNLDIDFKYIPYRFMNRYNGAMM
DVWDAHYKMFWFDHHGNSPVANIQEAEQAAEFKKRWTQFVNVTFQMESTITRIAYVFYGPYVNVSSCRFI
DSSDSGLQISLNVNNTEHIVSVVTDYQNLKNRFNYLGFGGFANVADQGQITQFGLGTQAIVKSVRHEKTV
FPFGFKFNIAVGFILCISLVILTFQWRFYLSFRKLMRYILILVIALWFIELLDVWSTCTQPICTKWTRTE
VKEREKAVTSERHLVDLPDVVITSLPGSGAEILKQLFFNSSDFLYIRVPTAYIDIPETEFEIDSFVDACE
WKVSDIHSGHFRLLRGWLLSLVQDTKLHLQNIHLHEPNRGKLTQYFTANKDKKRKLKRRESLPEQRSRMK
GAFDRDAEYIRALRRHLDYYPSARTVLSLSSGSWTLKLHFFQEVLGTSMRALYIVRDPRAWIYSMLYSSK
PSLYTLKNVPEHLAKLFKIEEGKSKCNLNSGYAFEYESLKKELEKSQSSAVSLLSHLWLANTAAALRINT
DLLPTSYHLVKFEDIVHFPQKTTERIFAFLGIPLSPASLNQILFATSTNLFYLPYEREISPTNTNIWKQN
LPRDEIKVIENICWTLMDRLGYPKFMD
>57421
MALMFTGHTLFLALMMFAVFTSEESVSNYSDWVTFIENVDQYEKRQLEGLSAEQKLKKPVLHPSLYFDAE
DVQALRQKARSSHSHLFRAIRSAVTIMLSNPLYYLPPPKHADFAAKWNEIYGNNLPPLAFYCLLCPEDKA
AFDFALEYMDRMAGYKNWLVENAPGDEVPLGHSLTGFATAFDFLYNSLEEERRQKYLEKIWSVSEEMYEY
SKVRSWGKQLLHNHQATNMLALLIGALVAGVDRGSRANIWKHTVVDVMEKTMFLLNHVVDGSLDEGVAYG
SYTAKSVTQYVFLAQRHFGINNLGNNWLKMHFWFYYATLLPGFQRTVGVADSNYNWFYGPESQLVFLDKF
ILKNGAGNWLAQQIRKHRPKDGPMVPSTAQRWSTLHTEFIWYAAEIPPQPPPDYGTAKMHVFPNWGVVTY
GAGLPNSQANTFVSFKSGKLGGRAVYDIVHFQPYAWIDGWRSFNPGHEHPDQNSFTFAPNGQVFVSEALY
GPKLSHLNNVLVFAPSPTSQCNQPWEGQLGECAQWLKWIGDEVGDSAGEIITASQAGEMMFVSGEAISAY
TSAMRLRSVYRVLLLLNSQTLLVVDHIEKEDDSPVNSVSAFFHNLDIDFKYIPYKFKNKYNGAMMDVWDA
HYKMFWFDHHGSSPVARIQEAEQAAEFKKRWTQFVNVTFPMKNTLTRIVYLFHGPYVNVSNCRLIDNAKS
GFQIALSVNNTENTISVVTEYQNLKTRFDYLGFGGFAKVVHEDKVTKFGLGTESVKKQMKNNRVIFPFGF
KVNVIAGLILGVSLVVLAFQWRFYISFGKMLRWILILVVTLWLIELVDVWSVCTQPICAKWSSDMTRLEH
DKGNKAKQLEGNPVVLPDVIITSLPASGAEILKQLFFNSSDFLYIRIPTPYLEIPETEFEIDSFVDPCEW
KVSDVQNGHFRLIQGWLRSLVQGTKLHLQNIHLYEASRSKFAQHSPTSKDKKKRSKKRESLSEQRSRARG
GPDKDAEYIRELRRHLAYYPNARPVLSLSSGSWTLKLPFFQEILGPSMRALYVVRDPRAWIYSMLYKNKP
SLYSLKNVPQHLAAMFKGEDGKGKCHLNEGYAFEYESLRNELSNSNSNAVSVLSYLWLANTAAALRVNRD
LLPTNYQLVKFEDIVSFPQKTAERIFTFLGIPLPPASLNQILFATSTSLFYLPYEGEISPSSIHAWKENM
PSEEIRQVEDICCSLMDHLGYPKFVE
>9483
MPKEGAPPWIMAVMFTGHLLFLALLMFAFSTFEESVSNYSEWAVFTDDIDQFKTQRVQDFRPKQKLKKSM
LHPSLYFDGGEIQAMRQKSRTSHLHLFRAIRSAVTVMLSNPTYYLPPPKHADFAAKWNEIYGNNLPPLAL
YCLLCPEDKVAFEFVLEYMDRMVGYKDWLVENAPGDEVPIGHSLTGFATAFDFLYNLLDNHRRQKYLEKI
WVITEEMYEYSKVRSWGKQLLHNHQATNMIALLTGALVTGVDKGSKANIWKQVVVDVMEKTMFLLNHIVD
GSLDEGVAYGSYTAKSITQYVFLAQRHFNINNLDNNWLKMHFWFYYATLLPGFQRTVGIADSNYNWFYGP
ESQLVFLDKFILKNGAGNWLAQQIRKHRPKDGPMVPSTAQRWSTLHTEYIWYDPQLIPQPPAEYGTAKIH
TFPNWGVVTYGAGLPNTQTNTFVSFKSGKLGGRAVYDIVHFQPYSWIDGWRSFNPGHEHPDQNSFTFAPN
GQVFVSEALYGPKLSHLNNVLVFAPSPSSQCNKPWEGQLGECAQWLKWTGEEVGDAAGEIITASQHGEMI
FVSGEAVSAYSSAMRLKSVYRALLLLNSQTLLVVDHIERQEDSPINSVSAFFHNLDIDFKYIPYRFMNRY
NGAMMDVWDAHYKMFWFDHHGNSPMASIQEAEQAAEFKKRWTQFVNVTFQMESTITRIAYVFYGPYINVS
SCRFIDNSNSGLQISLNVNNTEHVVSIVTDYHNLKTRFSYLGFGGFASVADQGQITRFGLGTQAIVKPVR
HDRVILPFGFKFNIAVGLILCISLVILTFQWRFYLSFRKLMRWILILVIALWFIELLDVWSTCTQPICAK
WTRTEAEESKKSLSSEGHHIDLPDIVITSLPGSGAEILKQLFFNSSDFLYIRVPTAYIDIPETEFEIDSF
VDACEWKVSDIRSGHFRLLRGWLQSLVQDTKLHLQNIHLHEPSRGKLAQYFTMNKDKKRKLKRRESLPEQ
RSQMKGAFDRDAEYIRALRRHLFYYPSARPVLSLSSGSWTLKLHFFQEVLGASMRALYIVRDPRAWIYSM
LYNSKPSLYSLKNVPEHLAKLFKIEGGKGKCNLNSAYAFEYEPLRKELSKSKSNAVSLLSHLWLANTAAA
LRINTDLLPTSYQLVKFEDIVHFPQKTTERIFAFLGIPLSPASLNQILFATSTNLFYLPYEGEISPTNTH
VWKQNLPREEIKVIENICWTLMDRLGYPKFMD
>9218
WIMALMFTGHTLFLALMMFAVFTFEESVSNYSDWVTFIENVDQYEKQQLEGLSAEQKLKKTVLYPSLYFD
AEDVQALRQKARTSHSHLFRAIRSAVMVMVSNPLYYLPPPKHVDFAAKWNEIYGNNLPPLAFYCLLCPED
KAALDFALEYMDRMAGYKNWLVENAPGDEVPLGHSLTGFATAFDFLYNSLENERRQKYLEKIWSVTEEMY
EYSKVRSWGKQLLHNHQATNMLALLIGALVAGVDKGSQANIWKHTVVDVMEKTMFLLNHVVDGSLDEGVA
YGSYTAKSVTQYVFLAQRHFGINNLENNWLKMHFWFYYATLLPGFQRTVGVADSNYNWFYGPESQLVFLD
KFIMKNGAGNWLAQQIRKHRPKDGPMVPSTAQRWSTLHTEFIWYAAEITPQPPPDYGTAKMHVFPNWGVV
TYGAGLPNSQTNTFVSFKSGKLGGRAVYDIVHFQPYAWIDGWRSFNPGHEHPDQNSFTFAPNGQVFVSEA
LYGPKLSHLNNVLVFAPSPTSQCNQPWEGQLGECAQWLKWIGDEVGDSTGEIITASQTGDMMFVSGEAVS
AYASAMKLKSVYRVLLLLNSQTLLVVDHIEKEEDSPVSSVSAFFHNLDIDFKYIPYKFKNKYNGAMMDVW
DAHYKMFWFDHHGSSPVARIQEAEQAAEFKKRWTQFVNVTFPMKNTLTRIVYLFYGPYVNVSNCRLIDNA
KSGFQISLSVNNTENTISVVTEYQNLKTRFDYLGFGGFAKVVHENKVTKFGLGTESVEKRLKNSGVVFPF
GFKVNIIAGLILGVSLVILAFQWRFYISFSKMLRWILILVVTLWLIELVDVWSMCTQPICAKWSSDMTRL
EHDKGNKAKQLEGNPVVLPDVIITSLPTSGAEILKQLFFNSSDFLYVKIPTPYLEIPETEFEIDSFVDPC
EWKVSDVQNGRFRLIQGWLQSLVRDTKLHLQNIHLYEASRSKIAQHSAVSKDKKKRSKKRESLLEQRSRA
RGSQDKDAEYIRELRRHLIYYPNARPVLSLSSGSWTLKLPFFQEILGPSMRALYVVRDPRAWIYSMLYKN
KPSLYSLKNVPQHLAAMFKGENGKGKCSLNEGYAFEYESLRKELSNSNSDAVSVLSYLWLANTAAALRIN
GDLQPTNYLLVKFEDIVSFPQKSAETIFAFLGIPLPPASLNQILFATSTSLFYLPYEGEISPSSIHAWKQ
NMPNEEIRRIEDICCSLMDHLGYPKFIE
>57068
MALMFTGHTLFLALMMFAVFTFEESVSNYSDWVTFIENVDQYEKQQLEGLSAEKKLKKQVLHPSLYFDAQ
DVQALRQKARTSHLHLFRAIRNAVTVMLSNPLYYLPPPKHVDFAAKWNEIYGNNLPPLAFYCLLCPEDKA
AFDFALEYMDRMAGYKNWLVENAPGDEVPLGHSLTGFATAFDFLYNSLENERRQKYLEKIWSVSEEMYEY
SKVRSWGKQLLHNHQATNMLALLIGALVVGVDKGSQANIWKHTVVDAMEKTMFLLNHIVDGSLDEGVAYG
SYTAKSVTQYVFLAQRHFGINNLENNWLKMHFWFYYATLLPGFQRTVGIADSNYNWFYGPESQLVFLDKF
IMKNGAGNWLAQQIRRHRPKDGPMVPSTAQRWSTLHTEFIWYAAEITPRPPPDYGTAKMHVFPNWGVITY
GAGLPNSQANTFVSFKSGKLGGRAVYDIVHFQPYTWIEGWRSFNPGHEHPDQNSFTFAPNGQVFVSEALY
GPKLSHLNNVLVFAPSPTSQCNQPWEGQLGECAQWLKWIGDEVGDSTGEIITASQAGDMMFVSGEAVSAY
TSAMKLKSVYRILLLLNSQTLLVVDHIEKEEDSPVNSVSAFFHNLDIDFKYIPYKFKNKYNGAMMDVWDA
HYKMFWFDHRGSSPVARIQEAEQAAEFKKRWTQFVNVTFPMKNTLTRIVYLFYGPYVNVSNCRLIDNAKS
GFQISLSVNNTENTIYVVTEYQNLKARFDYLGFGGFAKVVNENKVTKFGLGTESVKKQMKNNRVVFPFGF
KVNVIAGLILGVSLVILAFQWRFYISFGKMLRWILILVVTLWLIELVDVWSMCTQPICAKWSSDMTRLEH
DKGNKAKQLEGNPVVLPDVIITSLPASGAEILKQLFFNTSDFLYIRIPTPYLEIPETEFEIDSFVDPCEW
KVSDVQNGNFRLIQGWLQSLVRDTKLHLQNIHLYEASRSKIAQHSTLSKEKKKRSKKRESLSEQRSRARG
SQEKDAEYIRELRRHLIYYPNARPVLSLSSGSWTLKLPFFQKILGPSMKALYVVRDPRAWIYSMLYKNKP
NLYSLKSVPQHLAAMFKGENGKEKCSLNEGYAFEYESLRKELSNSNSNAISVLSYLWLANTAAAMRINGD
LLPTNYQLVKFEDIVSFPQKTAEKIFAFLGIPLPPASLNQILFATSTSLFYLPYEGEISPSSIHAWKKNM
PHEEIRQIEDICCSMMDHLGYPKFIE
>9135
MALMFTGHTLFLALMVFDVFTFEESVSNYSDWMTFIENVDQYEKQQLEGLSTEQKLKGTVLHPSLYFDPQ
DVQALRQKAHTSHLHLFRAIRSAVMVMLSNPLYYLPPPKHIDFAAKWNEIYGNNLPPLAFYCLLCPEDKA
AFDFALEYMDRMAGYKNWLVENAPGDEVPLGHSLTGFATAFDFLYNSLGNERRQKYLEKIWSVSEEMYEY
SKVRSWGKQLLHNHQATNMLALLIGALVAGVDRGSQANIWKHTVVDVMEKTMFLLNHIVDGSLDEGVAYG
SYTAKSVTQYVFLAQRHFGINNLENNWLKMHFWFYYATLLPGFQRTVGVADSNYNWFYGPESQLVFLDKF
IMKNGAGNWLAQQIRKHRPKDGPMVPSTAQRWSTLHTEFIWYAAEITPQPPPDYGTAKMHVFPNWGVVTY
GAGLPNSQTNTFVSFKSGKLGGRAVYDIVHFQPYRWIDGWRSFNPGHEHPDQNSFTFAPNGQVFVSEALY
GPKLSHLNNVLVFAPSPTSQCNQPWEGQLGECAQWLKWIGDEVGDSTGEVVTASQAGDMMFVSGEAVSAY
TSAMKLKSVYRVLLLLNSQTLLVVDHIEKEEDSPVNSVSAFFHNLDIDFKYIPYKFKNKYNGAMMDVWDA
HYKMFWFDHRGSSPVARIQEAEQAAEFKKRWTQFVNVTFPMKNVLTRIVYLFYGPYVNVSNCRLMDNAKS
GFQISLSVNNTENTISVVTEYQNIKARFDYLGFGGFAKVVHENKVTKFGLGTESVKKDRKNNRVVFPFGF
KVNIIAGLILGVSLIILAFQWRFYISFGKMLRWILILVVTLWLIELVDVWSMCTQPICAKWSVDVTRLEH
DKGNKAKPLEGNPVVLPDVIITSLPTSGAEILKQLFFNTSDFLYIRIPTPYLEIPETEFEIDSFVDPCEW
KVSDVQNGNFRLIQGWLQSLVQDTKLHLQNIHLYESSRSKVAQHSALSKDKKKRSKKRESLLEQRSRARG
SQEKDAEYIRELRRHLIYYPNARPVLSLTSGSWTLKLPFFQEILGPSMRALYVVRDPRAWVYSMLYKNKP
SLYSLKNIPQRLAAMFKGENGKEKCSLNEGYASEFESLRKEVSNSNSNAISLLSYLWLANTAAAMRINRD
LLPTNYRLVKFEDIVTFPQKTAETIFAFLGVPLPPASLNQILFATSTSLFYLPYEGEISPSSIHAWKQNM
PHKEIRQIEDICCSLMDHLGYPKFIE
>9233
MALMFTGHTLFLALMMFAVFTFEESVSNYSDWVTFIENVDQYEKQQLEGLSAEQKLKKTVLHPSLYFDAE
DVQALRQKAHTSHSHLFRAIRSAVTVMLSNPLYYLPPPKHVDFAAKWNEIYGNNLPPLAFYCLLCPEDKA
AFDFALEYMDRMAGYKNWLVENAPGDEVPLGHSLTGFATAFDFLYNSLENERRQRYLEKIWSVSEEMYEY
SKVRSWGKQLLHNHQATNMLALLIGALVAGVDKGSQANIWKHTVVDVMEKTMFLLNHIVDGSLDEGVAYG
SYTAKSVTQYVFLAQRHFGINNLENNWLKMHFWFYYATLLPGFQRTVGVADSNYNWFYGPESQLVFLDKF
IMKNGAGNWLAQQIRKHRPKDGPMVPSTAQRWSTLHTEFIWYAAEITPQPPPDYGTAKMHVFPNWGVVTY
GAGLPNSQTNTFVSFKSGKLGGRAVYDIVHFQPYAWIDGWRSFNPGHEHPDQNSFTFAPNGQVFVSEALY
GPKLSHLNNVLVFAPSPTSQCNQPWEGQLGECAQWLKWIGDEVGDSTGEIITASQAGDMMFVSGEAVSAY
TSAMKLKSVYRVLLLLNSQTLLVVDHIEKEEDSPVNSVSAFFHNLDIDFKYIPYKFKNKYNGAMMDVWDA
HYKMFWFDHHGSSPVARIQEAEQAAEFKKRWTQFVNVTFPMKNTLTRVVYLFYGPYVNVSNCRLIDNAKS
GFQISLSVNNTENTISVVTEYQNLKTRFDYLGFGGFAKVVHENKVTKFGLGTESVEKWIKNNRVVFPFGF
KVNIIAGLILGVSLVILAFQWRFYISFSKMLRWILILVVILWLIELVDVWSMCTQPICAKWSSDMTRLEH
DKGNKAKQLEGNPVVLPDVIITSLPASGAEILKQLFLNSSDFLYIRIPTPYLEIPDTEFEIDSIVDPCEW
KVSDVQNGHFRLIQGWLQSLVRGTKLHLQNIHLYEASRSKIAQHSAMSKDKKKRSKRRESLSEQRSRARG
SQDKDAEYIRELRRHLIYYPNARPVLSLSSGSWTLKLPFFQEILGPSMRALYVVRDPRAWIYSMLYKNKP
SLYSLKNVPQHLAAMFKGENGKGKCSLNEGYAFEYESLRKELSNSNSNAVSVLSYLWLTNTAAALRINGD
LQPTNYQLVKFEDIVSFPQKTAETVFAFLGIPLPPASLNQILFATSTSLFYLPYEGEISPSSIHAWKQNM
PNEEIRQIEDICCSLMDHLGYPKFIE
>9238
MALMFTGHTLFLALMMFAVFTFEESVSNYSDWVTFIENIDQYEKQQLEGLSAEQKLKKTVLRPSLYFDAE
DVQALRQKAHTSHSHLFRAIRSAVTVMLSNPLYYLPPPKHVDFAAKWNEIYGNNLPPLAFYCLLCPEDKA
AFDFALEYMDRMAGYKNWLVENAPGDEVPLGHSLTGFATAFDFLYNSLENERRQKYLEKIWSVSEEMYEY
SKVRSWGKQLLHNHQATNMLALLIGALVAGVDKGSQANIWKHAVVDVMEKTMFLLNHIVDGSLDEGVAYG
SYTAKSVTQYVFLAQRHFGINNLENNWLKMHFWFYYATLLPGFQRTVGVADSNYNWFYGPESQLVFLDKF
IMKNGAGNWLAQQIRKHRPKDGPMVPSTAQRWSTLHTEFIWYAAEITPQPPPDYGTAKMHVFPNWGVVTY
GAGLPNSQTNTFVSFKSGKLGGRAVYDIVHFQPYAWIDGWRSFNPGHEHPDQNSFTFAPNGQVFVSEALY
GPKLSHLNNVLVFAPSPTSQCNQPWEGQLGECAQWLKWIGDEVGDSTGEIITASQAGDMMFVSGEAVSAY
TSAMKLKSVYRVLLLLNSQTLLVVDHIEKEEDSPVNSVSAFFHNLDIDFKYIPYKFKNKYNGAMMDVWDA
HYKMFWFDHHGSSPVARIQEAEQAAEFKKRWTQFVNVTFPMKNTLTRIVYLFYGPYVNVSNCRLIDNAKS
GFQISLSVNNTENTISVVTEYQNLKTRFDYLGFGGFAKVVHENKLTKFGLGTESVEKWVKNNRVVFPFGF
KVNIIAGLILGVSLVILAFQWRFYISFSKMLRWILILVVILWLIELVDVWSMCTQPICAKWSSDMTRLEH
DKGNKAKQLEGNPVVLPDVIITSLPASGTEILKQLFFNSSDFLYIRIPTPYLEIPETEFEIDSIVDPCEW
KVSDVQNGHFRLIQGWLQSLVRGTKLHLQNIHLYEASRSKIAQHSAMSKDKKKRSKKRESLSEQRSRARG
SQDKDAEYIRELRRHLIYYPNARPVLSLSSGSWTLKLPFFQEILGPSMRALYVVRDPRAWIYSMLYKNKP
SLYSLKNVPQRLAAMFKGENGKGKCSLNEGYAFEYESLRKELSNSNSNAVSVLSYLWLTNTAAALRINGD
LQPANYQLVKFEDIVSFPQKTAETIFAFLGIPLPPASLNQILFATSTSLFYLPYEGEISPSSIHAWKQNM
PNEEIRQIEDICCSLMDHLGYPKFIE
>36300
MALMFTGHTLFLALMMFAVFTFEESVSNYSDWVTFIENVDQYEKQQLEGLNAEQKLKKTVLHPSLYFDAE
DVQALRQKAHTSHSHLFRAIRSAVTVMLSNPLYYLPPPKHVDFAAKWNEIYGNNLPPLAFYCLLCPEDKA
AFDFALEYMDRMAGYKNWLVENAPGDEVPLGHSLTGFATAFDFLYNSLENKRRQKYLEKIWSVSEEMYEY
SKVRSWGKQLLHNHQATNMLALLIGALVSGVDKGSQANIWKHTVVDVMEKTMFLLNHIVDGSLDEGVAYG
SYTAKSVTQYVFLAQRHFGINNLENNWLKMHFWFYYATLLPGFQRTVGVADSNYNWFYGPESQLVFLDKF
IMKNGAGNWLAQQIRKHRPKDGPMVPSTAQRWSTLHTEFIWYAAEITPQPPPDYGTAKMHVFPNWGVVTY
GAGLPNSQTNTFVSFKSGKLGGRAVYDIVHFQPYAWIDGWRSFNPGHEHPDQNSFTFAPNGQVFVSEALY
GPKLSHLNNVLVFAPSPTSQCNQPWEGQLGECAQWLRWIGDEVGDSTGEIITASQAGDMMFVSGEAVSAY
TTAMKLKSVYRVLLLLNSQTLLVVDHIEKEEDSPVNSVSAFFHNLDIDFKYIPYKFKNKYNGAMMDVWDA
HYKMFWFDHHGSSPVARIQEAEQAAEFKKRWTQFVNVTFPVKNTPTRIVYLFYGPYVNVSNCRLIDNAKS
GFQISLSVNNTENTISVVTEYQNLKARFDYLGFGGFAKVVHENKVTKFGLGTESVEKWIKNNKVVFPFGF
KVNIIAGLILGVSLVILAFQWRFYISFSKMLRWILILVVTLWLIELVDVWSMCTQPICAKWSSDMTRLEH
DKGNKAKQLEGNRVVLPDVIITSLPASGAEILKQLFFNSSDFLYIRIPTPYLEIPETEFEIDSFVDPCEW
KVSDVQNGHFRLIQGWLQSLVRGTKLHLQNIHLYEASRSKIAQHSVVSKDKKKRSKKRESLSEQRSRARR
SQDKDAEYIRELRRHLIYYPNARPVLSLSSGSWTLKLPFFQEILGPSMRALYVVRDPRAWIYSMLYKNKP
SLYSLKNVPQRLAAMFKGKNGKGKCSLNEGYAFEYESLKKELSNSNSNAVSVLSYLWLTNTAAALRINGD
LQPTNYQLVKFEDIVSFPQKTAETIFAFLGIPLPPASLNQILFATSTSLFYLPYEGEISPSSIHAWKQNM
PNEEIRRIEDICCSLMDHLGYPKFIE
>128390
MALMFTGHTLFLALMMFAVFTLEESVSNYSDWVTFIENVDQYEKQQLEGLTAEQKLKKTVLHPSLYFDAE
DVQALRQKAHTSHSHLFRAIRTAVTVMLSNPLYYLPPPKHVDFAAKWNEIYGNNLPPLAFYCLLCPEDKA
AFDFALEYMDRMAGYKNWLVENAPGDEVPLGHSLTGFATAFDFLYNSLENERRQKYLEKIWSVSEEMYEY
SKVRSWGKQLLHNHQATNMLALLIGALVAGVDKGSQANIWKHTVVDIMEKTMFLLNHIVDGSLDEGVAYG
SYTAKSVTQYVFLAQRHFGINNLENNWLKMHFWFYYATLLPGFQRTVGVADSNYNWFYGPESQLVFLDKF
IMKNGAGNWLAQQIRKHRPKDGPMVPSTAQRWSTLHTEFIWYAAEITPQPPPDYSTAKMHVFPNWGVVTY
GAGLPNGQTNTFVSFKSGKLGGRAVYDIVHFQPYAWIDGWRSFNPGHEHPDQNSFTFAPNGQVFVSEALY
GPKLSHLNNVLVFAPSPTSQCNQPWEGQLGECAQWLKWIGDEVGDSTGEIITASQAGDMMFVSGEAVSAY
TSAMKLKSVYRILLLLNSQTLLVVDHIEKEEDSPVNSVSAFFHNLDIDFKYIPYKFKNKYNGAMMDVWDA
HYKMFWFDHHGSSPVARIQEAEQAAEFKKRWTQFVNVTFPMKNTLTRIVYLFYGPYVNVSNCRLIDNAKS
GFQISLSVNNTENTISVVTEYQNLKTRFDYLGFGGFAKVVHENKVTKFGLGTESVEKGIKNNRVVFPFGF
KVNIIAGLILGVSLVILAFQWRFYISFSKMLRWILILVVTLWLIELVDVWSMCTQPICAKWSSDMTRLEH
DKGNKAKQLEGNPVVLPDVIITSLPASGAEILKQLFFNSSDFLYVRIPTPYLEIPETEFEIDSFVDPCEW
KVSDVQNGHFRLIQGWLQSLVRGTKLHLQNINLYEASRSKIAQHSAISKDKRKRSKKRESLSEQRSRARG
NQDKDAEYIRELRRHLIYYPNARPVLSLTSGSWTLKLPFFQGILGSSMRALYVVRDPRAWIYSMLYKNKP
SLYSLKNVPQRLAAMFKGESGKGKCSLNEGYAFEYESLRKELSNSNSNAVSVLSYLWLTNTAAALRINGD
LQPANYQLVKFEDIVSFPQKTAETIFAFLGIPLPPSSLNQILFATSTSLFYLPYEGEISPSSIHAWKQNM
PSEEIRRIEDICCSLMDHLGYPKFIE
>9209
MALMFTGHTLFLALMMFAVFTFEESVSNYSDWVTFIENVDQYEKQQPEGVSAEEKLKKTVLHPSLYFDAG
DVQALRQKAHTSHSHLFRAIRSAVTVMLSNPLYYLPPPKHADFAAKWNEIYGNNLPPLAFYCLLCPEDKA
AFDFALEYMDRMAGYKNWLVENAPGDEVPLGHSLTGFATAFDFLYNSLENGRRQKYLEKIWSVSEEMYEY
SKVRAWGKQLLHNHQATNMLALLIGALVAGVDKGSQANIWKHTVVDAMEKTMFLLNHIVDGSLDEGVAYG
SYTAKSVTQYVFLAQRHFGINNLENHWLKMHFWFYYATLLPGFQRTVGIADSNYNWFYGPESQLVFLDKF
VMKNGAGNWLAQQIRKHRPKDGPMVPSTAQRWSTLHTEFIWYAAEITPRPPPDYGSAKMHVFPNWGVVTY
GAGLPNSLTNTFVSFKSGKLGGRAVYDIVHFQPYAWIDGWRSFNPGHEHPDQNSFTFAPNGQVFVSEALY
GPKLSHLNNVLVFAPSPTSQCNHPWEGQLGECAQWLKWMGDEVGDSTGEIITASQAGDMMFVSGEAVSAY
TSAMKLKSVYRVLLLLNSQTLLVVDHIEKEEDSPVNSVSAFFHNLDIDFKYIPYKFKNKYNGAMMDVWDA
HYKMFWFDHHGSSPVAKIQEAEQAAEFKKRWTQFVNVTFPMKNTLTRIVYLFYGPYVNVSNCRLTDNGKS
GFQISLSVNNTENTISVVTEYQNLKTRFDYLGFGGFAKVVHENKVTKFGLGTESVEKQVKNNRVVFPFGF
KVNIIAGLILGVSLVILAFQWRFYISFSKMLRWILILVVTLWLIELVDVWSMCTQPICAKWSSDMTRLEH
DKGNKAKQLEGNPVVLPDVIITSLPASGAEILKQLFFNSSDFLYIRIPTPYLEIPATEFEIDSFVDPCEW
KVSDVQNGHFHLIQGWLQSLVQGTKLHLQNIPLYEASRSKITQHSAVGKDKKKRSKKGESLSEQRSRARG
NQDKDAEYIRELRRHLLYYPNARPVLSLSSGSWTLKLPFFQEILGPSMRALYVVRDPRAWIYSMLYKNKP
SLYSLKNVPQHLAAMFKGENGKGKCSLNQGYAFEYESLRKELSNSNSNAVSVLSYLWLTNTAAALRINGD
LQPTNYRLVRFEDIVSFPQKTAETIFAFLGIPLPPASLNQILFATSTSLFYLPYEGEISPSSIHAWKQNM
PAEEIRQIEDICNSLMDHLGYPKFIE
>55661
MALMFTGHTLFLALMMFAVFTFEESVSNYSDWVTFVENVDQYEKQQLEGLSSEQKLKKTVLHPSLYFDAE
DVPALRQKAHTSHSHLFRAIRSAVTVMLSNPLYYLPPPKHVDFAAKWNEIYGNNLPTLAFYCLLCPEDKA
AFDFALEYMDRMSGYENWLVENAPGDEVPLGHSLTGFATAFDFLYNSLENERRQKYLEKIWSVSEEMYEY
SKIRSWGKQLLHNHQATNMLALLIGALVAGVDKGNQANIWKHTVVEVMEKAMFLLNHIVDGSLDEGVAYG
SYTSKSVTQYVFLAQRHFGINNLDNNWLKMHFWFYYATLLPGFQRTVGIADSNYNWFYGPESQLVFLDKF
IMKNGAGNWLAQQIRKHRPKDGPMVPSTAQRWSTLHTEFIWYAAEISPQPPPDYGTAKMHVFPNWGVVTY
GAGLPNSQTNTFVSFKSGKLGGRAVYDIVHFQPYAWIDGWRSFNPGHEHPDQNSFTFAPNGQVFVSEALY
GPKLSHLNNVLVFAPSPTSQCNQPWEGQLGECAQWLKWIGDEVGDSAGEIITASQAGDMMFVSGEAVSAY
TSAMKLKSVYRILLLLNSQTLLVVDHIEKEEDSPVNSVSAFFHNLDIDFKYIPYKFKNKYNGAMMDVWDA
HYKMFWFDHHGSSPVARIQEAEQAAEFKKRWTQFVNVTFPMKNTLTRIVYLFYGPYVNVSNCRLIDNAKS
GFQISLSVNNTENTISVVTEYQNLKTRFDYLGFGGFAKVVHENKVTKFALGTESVEKRIQNMRIIFPFGF
KVNIIAGLVLGVSLIILAFHWRFYISFSKILRWILILVVTLWIIELVDVWSTCTQPICAKWNGDMTRLEH
DKGNKAKQLEGNPVVLPDVIITSLPTSGAEILKQLFFNSSDFLYIRIPTPYLEIPETEFGINSFVDPCEW
KVSHVQNGHFRLIQGWLQSLVRDTKLHLQNIHLYEASKSKIAQHSAISKDKKKRSRKRESLSEQRSRARG
SQDKDAEYIRELRRHLNYYPNARPVLSLSSGSWTLKLPFFQEILGPSMRALYVVRDPRAWIYSMLYKNKP
SLYSLKNVPQHLAAMFKLQNGKGKCSLNEGYAFEYESLRKELSNSNSNAVSILSYLWLANTAAALRINGD
LLPTNYQLVKFEDIVSFPQKTAETIFAFLGIPLSPASLNQILFATSTSLFYLPYEGEISPSSIHAWKQNM
PNEEIRQIEDICCSLMDHLGYPKFVE
>30455
MALMFTGHTLFLALMMFAVFTSEESVSNYSDWVTFIENVDQYEKQQLEGLSAEQKLKKTVLYPSLYFDAE
DVQALRQKAHTSHSHLFRSIRSAVTVMLSNPLYYLPPPKHVDFAAKWNEIYGNNLPCLAFYCLLCPEDKA
AFDFALEYMDRMAGYKNWLVENAPGDEVPLGHSLTGFATAFDFLYNSLENERRQKYLEKIWSVSEEMYEY
SKVRSWGKQLLHNHQATNMLALLIGALVAGVDKGSQANIWKHAVVDVMEKTMFLLNHIVDGSLDEGVAYG
SYTAKSVTQYVFLAQRHFGINNLENNWLKTHFWFYYATLLPGFQRTVGIADSNYNWFYGPESQLVFLDKF
IMKNGAGNWLAQQIRKHRPKDGPMVPSTAQRWSTLHTEFIWYAAEIAPQPPPDYGNAKMHVFPNWGVVTY
GAGLPNSQTNTFVSFKSGKLGGRAVYDIVHFQPYAWIDGWRSFNPGHEHPDQNSFTFAPNGQVFVSEALY
GPKLSHLNNVLVFAPSPTSQCNQPWEGQLGECAQWLKWIGDEVGDSTGEIITASQAGDMMFVSGEAVSAY
TSAMKLKSVYRVLLLLNSQTLLVVDHIEKEEDSPVNSVSAFFHNLDIDFKYIPYKFKNKYNGAMMDVWDA
HYKMFWFDHHGSSPVARIQEAEQAAEFKKRWTQFVNVTFPMKNTLTRIVYLFYGPYVNVSNCRLIDNAKS
GFQILLSVNNTENTISVVTEYQNLKTRFDYLGFGGFAKVVHENKVTKFGLGTESVEKRVKHNRVVFPFGF
KVNIIAGLILGVSLVILAFQWRFYISFSKMLRWILILVVILWLIELVDVWSMCTQPICAKWSSDVTRLEH
DKGNKAKQVEGNPLVLPDVIITSLPASGAEILKQLFFNSSDFLYVRIPTPYLEIPETEFEIDSFVDPCEW
KVSDVQNGHFRLIQGWLQSLVRGTKLHLQNIHLYEASRSKIAQHSAISKDKKKRSKKRESLSEQRSRARG
SQDKDAEYIRELRRHLTYYPNARPVLSLSSGSWTLKLPFFQEILGPSMRALYVVRDPRAWIYSMLYKNKP
SLYSLKNVPQRLAAMFKGENGKGKCSLNEGYAFEYESLRKELSNSNSNAVSVLSYLWLTNTAAALRINGD
LQPTNYQLVKFEDIVSFPQKTAETIFAFLGIPLPPASLNQILFATSTSLFYLPYEGEISPSSIHAWKQNM
PSEEIRQIEDICCSLMDHLGYPKFIE
>441894
MALMFTGHTLFLALMFFAVFTFEESVSNYSDWVTFIENVDRYEKQKLQGLSAEQKLKKTVLHPSLYFDAE
DVQTLRQKAHTSHLHLFRAIRSAVTVMLSNPLYYLPPPKHVDFAAKWNEIYGNNLPPLAFYCLLCPEDKA
AFDFVLEYMDRMAGYKNWLVENAPGDEVPLGHSLTGFATAFDFLYNSLENGRRQKYWEKIRSVSEEMYEY
SKVRAWGKQLLHNHQATNMLALLTGALVTGVDKESQANIWKHTVVDVMEKTMFLLNHIVDGSLDEGVAYG
SYTAKSVTQYVFLAQRHFGINNLENNWLKMHFWFYYATLLPGFQRTVGIADSNYNWFYGPESQLVFLDKF
VMKNGAGNWLAQQIRKHRPKDGPMVPSTAQRWSTLHTEFIWYAAELTPQPPPDYGTAKMHVFPNWGVVTY
GAGLPNSQTNTFVSFKSGKLGGRAVYDIVHFQPYAWIDGWRSFNPGHEHPDQNSFTFAPNGQVFVSEALY
GPKFSHLNNVLVFAPSPTSQCNQPWEGQLGECAQWLKWIGDEVGDSTGEIITASQSEDMMFVSGEAASAY
TSSMKLKSVYRILLLLNSQTLLVVDHIEKEEDSPVNSVSAFFHNLDIDFKYMPYKFKNKYNGAMMDVWDA
HYKMFWFDHHGSSPVARIQEAEQAAEFKKRWTQFVNVTFPMKTTLKRIVYLFSGPYVNVSSCRFIDNARS
GFQISLNVNNTENTISVVTDYQDLKTRFSYLGFGGFAKVVREDKVTKFGLGTESLEKRINNNRMVFPFGF
KVNIIAGLILGVSLVILAFQWRFYISFSKMLRWILILVITLWLIELVDVWSTCTQPICAKWSSDMTRLEH
DKGNKAKQLEGNPVVLPDVIITSLPGSGAEILKQLFFNSSDFLYIRIPTAYLEIPETGFEIDSFVDQCEW
KISDVRNGHFRLLQGWFQSLVRDTKLHLQNINLYEASRSKIAQHSTISKDKKKRSKKRESLSEQRSRART
SQDKDAEYIRDLRRHLVYYPNARPVLSLSSGSWTLKLPFFQEILGSSMRALYVVRDPRAWIYSMLYKNKP
SLYSLKNVPQRLAAMFKWQNGKGKCSLNEGYAFEYESLREELANSNSDAVSVLSYLWLANTAAALRINGD
LLPTNYQLLKFEDIVNFPQKVAETIFAFLGVPLSPASLNQILFATSTSLFYLPYEGEISPSSIHAWKQNM
PSKEIRLIEDICCSLMDHLGYPKFIE
>188379
MALMFTGHTLFLALTMFAVFTFEESVSNYSDWVTFVENVDQYEKQQLEGLSAEQKLKKTVLHPSLYFNAE
DVQTLRQKAHTSHSHLFRAIRSAVTVMLSNPLYYLPPPKHVDFAAKWNEIYGNNLPPLAFYCLLCPEDKA
ALDFALEYMDRMAGYKNWLVENAPGDEVPLGHSLTGFATAFDFLYNSLENERRQKYLEKIWSVSEEMYEY
SKVRSWGKQLLHNHQATNMLALLIGALVAGVDKGSQANIWKHTVVDVMEKTMFLLNHIVDGSLDEGVAYG
SYTAKSVTQYVFLAQRHFGINNLENNWLKMHFWFYYATLLPGFQRTVGVADSNYNWFYGPESQLVFLDKF
IMKNGAGNWLAQQIRKHRPKDGPMVPSTAQRWSTLHTEFIWYAAEITPQPPPDYGTAKVHVFPNWGVVTY
GAGLPNSQTNTFVSFKSGKLGGRAVYDIVHFQPYAWIDGWRSFNPGHEHPDQNSFTFAPNGQVFVSEALY
GPKLSHLNNVLVFAPSPTSQCNQPWEGQLGECAQWLKWIGDEVGDSTGEIVTASQAGDMMFVSGEAVSAY
ASTMKLKSVYRVLLLLNSQTLLVVDHIEKEEDSPVNSVSAFFHNLDIDFKYIPYKFKNKYNGAMMDVWDA
HYKMFWFDHHGSSPVARIQEAEQAAEFKKRWTQFVNVTFPMKSMLTRIVYLFYGPYVNVSNCRLIDNAKS
GFQILLSVNNTENTISVVTEYQNLKARFDYLGFGGFAKVVNENKVIKFGLGTESMEKQIKNNRMGFPFGF
KVNIIAGLILGVSLIILAFQWRFYISFSKMLRWILVVVVTLWLIELVDVWSMCTQPICAKWSSDMTRLEH
DKGNKAKQLEGNPVVLPDVIITSLPASGAEILKQLFFNSSDFLYIRIPTPYLEIPETEFEIDSFVDPCEW
KVSDVQNGHFRLIQGWLQSLVRGTKLHLQNIHLYEGSRSKIAQHSAASKDKKKRSKKRESLSEQRSRTRG
SQDKDAEYIRELRRHLVYYPHARPVLSLSSGSWTLKLPFFQEILGPSMRALYVVRDPRAWIYSMLYKNKP
SLYSLKNVPQRLAAMFKGKNGKGECSLNEGYAFEYESLRKELSNPNSNAVSVLSYLWLTNTAAALRINGD
LQPTNYQLVKFEDIVSFPQKTAETIFAFLGIPLPPASLNQILFATSTSLFYLPYEGEISPSSIHAWKQNM
PNEEIRQIEDICCSLMDHLGYPKFIE
>54380
MALMFTGHTLFLALMMFAVFTFEESVSNYSDWVTFIENVDQYEKQQLEGLSAEQKLKKSVLHPSLYFDAE
DVQALRQKAHTSHSHLFRAIRSAVTVMLSNPLYYLPPPKHVDFAAKWNEIYGNNLPPLAFYCLLCPEDKA
AFDFALEYMDRMAGYKNWLVENAPGDEVPLGHSLTGFATAFDFLYNSLEDERRQKYLEKIWSVSEEMYEY
SKVRSWGKQLLHNHQATNMLALLIGALVAGVDKGSQANIWKHAVVDVMEKAMFLLNHIVDGSLDEGVAYG
SYTAKSVTQYVFLAQRHFGINNLENNWLKMHFWFYYATLLPGFQRTVGVADSNYNWFYGPESQLVFLDKF
IMKNGAGNWLAQQIRRHRPKDGPMVPSTAQRWSTLHTEFIWYAAEIAPQPPPGYGTAKMHVFPNWGVVTY
GAGLPNSQTNTFVSFKSGRLGGRAVYDIVHFQPYAWIDGWRSFNPGHEHPDQNSFTFAPNGQVFVSEALY
GPKLSHLNNVLVFAPSPTSQCNQPWEGQLGECAQWLKWIGDEVGDSTGEVVTASQAGDMMFVSGEAVSAY
TSAMKLKSVYRVLLLLNSQTLLVVDHIEKEEDSPVNSVSAFFHNLDIDFKYIPYKFKNRYSGAMMDVWDA
HYKMFWFDHHGSSPVARIQEAEQAAEFKKRWTQFVNVTFPMKNTLTRIVYLFYGPYVNVSNCRLVDNAKS
GFQISLSVNNTENTISVVTEYQNLKTRFDYLGFGGFCKVVHENKVTKFGLGTESVKKEMKIDRVVFPFGF
KVNIIAGLILGVSLVILAFQWRFYISFGKMLRWILILVVTLWLIELVDVWSVCTQPICAKWSSDMTRLEH
DKGNKAKQLEGNPVVLPDVIITSLPASGAEILKQLFFNSSDFLYIRIPTPYLEIPETEFEIDSFVDPCEW
KASDVQNGHFRLIQGWLQSLVRGTKLHLQNLRLYEASRSKIAQHSAISKDKKRRSKKRESLSEQRSRARG
SQDKDAEYIRELRRHLLYYPNARPVLSLSSGSWTLKLPFFQEILGPSMRALYVVRDPRAWVYSMLYKNKP
SLYSLKNVPQHLAAMFKGEDGNGKCSLNEGYAFEYESLRKELSNSNSNAVSVLSYLWLANTAAALRINGD
LLPTNYQLVKFEDIVSFPQKTAETIFAFLGIPLPPASLNQILFATSTSLFYLPYEGEISLSSIHAWKQNM
PSEEIRRIEDICCSLMDHLGYPKFIE
>37040
MALMFTGHTLFLVLVMFAVFTFEESVSNYSDWVTFVENVDQYEKQQLEGLSAEQKLKKPVLHPSLYFDAE
DVQALRLKAHTSHSHLFRAIRSAVTVMLSNPLYYLPPPKHVDFAAKWNEIYGNNLPPLAFYCLLCPEDKA
AFDFALEYMDRMAGYKNWLVENAPGDEVPLGHSLTGFATAFDFLYNSLENERRQKYLEKIRSVSEEMYEY
SKVRSWGKQLLHNHQATNMLALLIGALVAGVDKGSQANIWKHTVVDVMEKTMFLLNHIVDGSLDEGVAYG
SYTAKSVTQYVFLAQRHFGINNLENNWLKMHFWFYYATLLPGFQRTVGVADSNYNWFYGPESQLVFLDKF
IMKNGAGNWLAQQIRKHRPKDGPMVPSTAQRWSTLHTEFIWYAAEITPQPPPDYGTAKMHVFPNWGVVTY
GAGLPNSQTNTFVSFKSGKLGGRAVYDIVHFQPYAWIDGWRSFNPGHEHPDQNSFTFAPNGQVFVSEALY
GPKLSHLNNVLVFAPSPTSQCNQPWEGQLGECAQWLKWIGDEVGDSAGEIITASQAGDMMFVSGEAVSAY
TSAMKLKSVYRVLLLLNSQTLLVADHIEKEEDSPVNSVSAFFHNLDIDFKYIPYKFKNKYNGAMMDVWDA
HYKMFWFDHHGSSPVARIQEAEQAAEFKKRWTQFVNVTFPMKNTLTRIVYLFYGPYVNVSNCRLIDNAKS
GFQILLGINNTENTISVVTEYQNLKTRFDYLGFGGFAKVVHENKVTKFGLGTESVEKQVKNNTVVFPFGF
KVNIIAGLILGVSLVILAFQWRFYISFSKMLRWILILVVTLWLIELVDVWSMCTQPICARWSSDMTRLEH
DKGNKAKQLEGNPVVLPDIIITSLPGSGAEILKQLFFNSSDFLYIRIPTPYLEIPETEFEIDSFVDPCEW
KVSDVQNGHFHLIQGWLQSLIRGTKLHLQNIHLYEASRSKIAQHSAISKDKKKRSKKRESLSEQRSRVRG
SQDRDAEYIRELRRHLIYYPNARPVLSLSSGSWTLKLPFFQEILGPSMRALYVVRDPRAWIYSMLYKNKP
SLYSLKNVPQRLAAMFKGENGKGKCSLNEGYAFEYESLRKELSNSNSNAVSVLSYLWLTNTAAALRINGD
LQPTNYQLVKFEDIVNFPQKTTETIFAFLGIPLPPASLNQILFATSTNLFYLPYEGEISPSSIHAWKQNM
PYEEIRQIEDICCSLMDHLGYPKFIK
>57397
MALMFTGHTLFLALMMFAVFTFEESVSNYSDWVTFIENVDQYEKQQLEGLSAEQKLKKTILHPSLYFDAE
DVQVLRQKAHTSHSHLFRAIRSAVTVMLSNPLYYLPPPKHADFSAKWNEIYGNNLPPLAFYCLLCPEDKV
AFDFALEYMDRMAGYKNWLVENAPGDEVPLGHSLTGFATAFDFLYNSLENERRQKYLEKIWSVSEEMYEY
SKVRSWGKQLLHNHQATNMLALLIGALVAGVDKGSQANIWKHAVVDVMEKTMFLLNHIVDGSLDEGVAYG
SYTAKSVTQYVFLAQRHFGINNLENNWLKMHFWFYYATLLPGFQRTVGIADSNYNWFYGPESQLVFLDKF
ILKNGAGNWLAQQIRKHRPKDGPMVPSTAQRWSTLHTEFIWYAAEITPQPPPDYGSAKMHVFPNWGVVTY
GAGLPNSQTNTFVSFKSGKLGGRAVYDIVHFQPYAWIDEWRSFNPGHEHPDQNSFTFAPNGQVFVSEALY
GPKLSHLNNVLVFAPSPTSQCNQPWEGQLGECAQWLKWIGEEVGDSAGEIVTASQAGDMMFVSGEAVSAY
TSAMKLKSVYRILLLLNSQTLLVVDHIEKEEDSPVNSVSAFFHNLDIDFKYIPYKFKNKYNGAMMDVWDA
HYKMFWFDHHGSSPVARIQEAEQAAEFKKRWTQFVNVTFPMKNMLTRIVYLFYGPYVNVSNCRLIDNAKS
GFQISLSVNNTENTISVVTEYQNLKTRFDYLGFGGFAKVVHENSVTKFGLGTESVKKQIKNNKVVFPFGF
KVNIVAGLILGVSLVILAFQWRFYISFGKMLRWILILVVTLWLIELVDVWSTCTRPICAKWGSDMTKLEH
DKGNKAKQLEGNPVALPDVIITSLPASGAEILKQLFFNSSDFLYIRIPTPYLEIPETEFGIDSFVDPCEW
KVSDVQSGHFHLIQGWLQSLVRGTKLHLQNIHLYEASRSKIAQRSTINKDKKKRSKKRESLSEQRSRARG
SQDKDAEYIRELRRHLIYYPSARPVLSLSSGSWTLKLPFFQEILGPSMRALYVVRDPRAWVYSMLYKNKP
SLYSLKNVPQHLAAMFKGDNGKGRCSLNEGYAFEYESLRKELSNSNSNAVSVLSYLWLANTAAALRINGD
LLPTNYHLVKFEDIVSFPQKTAETIFAFLGIPLPPASLNQILFATSTNLFYLPYEGEISPSSIHAWKQNL
PSEEIRQIEDICCSLMDHLGYPKFIE
>118200
MALMVSGHTLFLALMMVAVFTFEESVRNYSDWVTFIEDIDQYEKQKLEGLSAEQKLKKNVLHPSLYFNAE
DVQVLRQKAHTSHSHLFRAIRSAVMVMLSNPLYYLPPPKHVDFAAKWNEIYGNNLPPLAFYCLLCPEDKA
AFDFALEYMDRMAGYKNWLVENAPGDEVPLGHSLTGFATAFDFLYNSLENERRQKYLEKILSVSEEMYEY
SKVRSWGKQLLHNHQATNMLALLIGALVSGGDKESQANIWKHTVVDVMEKTMFLLNHVVDGSLDEGVAYG
SYTAKSVTQYVFLAQRHFGINNLGNNWLKMHFWFYYATLLPGFQRTVGIADSNYNWFYGPESQLVFLDKF
ILRNGAGNWLAQQIRKHRPKDGPMVPSTAQRWSTLHTEFIWYAAEITPQPPPDYGTAKMHVFPNWGVVTY
GAGLPNSQTNTFVSFKSGKLGGRAVYDIVHFQPYAWIDGWRSFNPGHEHPDQNSFTFAPNGQVFVSEALY
GPKLSHLNNVLVFSPSPTSQCNQPWEGQLGECAQWLKWIGDEVGDSTGEIITASQAGDMMFVSGEAVSAY
SSAMKLKSVYRVLLLLNSQTLLVVDHIEKEEDSPVDSVSAFFHNLDIDFKYIPYKFKNKYSGAMMDVWDA
HYKMFWFDHHGSSPVARIQEAEQAAEFKKRWTQFVNVTFPMKSTLTRIVYLFYGPYVNVSNCRLTDNAKS
GFQISLSVNNTENTISVVTDYQNLKTRFDYLGFGGFAKVVHENRVTRFGLGTESVKKLVKNNRVVFPFGF
KVNVIAGLVLGISLVVLAFQWRFYISFGKMLRWILVLVVTLWLIELVDVWSMCTQPICAKWSSDMTRLEH
DKGNKAKQLEGNPVVLPDVIITSLPTSGAEILKQLFFNSSDFLYIRIPTPYLEIPETEFEIDSFVDPCEW
KVSDVQNGHFRLIQGWLQSLVQGTKLHLQNIRLHEASRSKIAQHSAISKDKKKRSKKRESLSEQRGRARG
SQDKDAEHIRELRRHLIYYPNARPVLSLSSGSWTLKLPFFQEILGPTMRALYVVRDPRAWIYSMLYKSKP
SLYSLKNVPQHLAAIFKGENGKGKCNLNEGYASEYESLRKELSNSNSNAVSVLSHLWLANTAAALRINSN
LLPTNYQLVKFEDIVSFPQKTAETIFAFLGIPLPPASLNQILFATSTNLFYLPYEGEISPSSIHAWKENM
PSEEIRQIEDICCSLMDHLGYPKFIE
>50402
MALMFMGHTLFLALMMFAVFTFEESVSNYSDWVTFTENVDRYEKQQLEGLSAEQKLKKTVLHPSLYFDAE
DVQALRQKAHTSHSHLFRAIRSAVMVMLSNPSYYLPPPKHADFAAKWNEIYGNNLPPLAFYCLLCPEDKA
AFDFALEYMDRMAGYKNWLVENAPGDEVPLGHSLTGFATAFDFLYNSLGNERRQKYLEKIWSVSEEMYEY
SKVRSWGKQLLHNHQATNMLALLIGALVAGVDKGSQANIWKHTVVDVMEKTMFLLNHIVDGSLDEGVAYG
SYTAKSVTQYVFLAQRHFGINNLENNWLKAHFWFYYATLLPGFQRTVGVADSNYNWFYGPESQLVFLDKF
VMKNGAGNWLAQQIRKHRPKDGPMVPSTAQRWSTLHTEFIWYAAEITPQPPPDYGTAKMHVFPNWGVVTY
GAGLPNSQTNTFVSFKSGKLGGRAVYDIVHFQPYAWIDGWRSFNPGHEHPDQNSFTFAPNGQVFVSEALY
GPKLSHLNNVLVFAPSPTSQCNQPWEGQLGECAQWLKWIGDEVGDSTGEIITASQAGDMMFVSGEAVSAY
TSAMKLKSVYRVLLLLNSQTLLVVDHIEKEEDSPVNSVSAFFHNLDIDFKYIPYKFKNKYNGAMMDVWDA
HYKMFWFDHHGSSPVARIQEAEQAAEFKKRWTQFVNVTFPMKNTLTRIVYLFYGPYVNVSNCRLIDNAKS
[truncated: 3,008 more rows]
