# Supplementary material for: The structure of human dermatan sulfate epimerase 1 emphasizes the importance of C5-epimerization of glucuronic acid in higher organisms
Source: Chem Sci. 2020 Dec 8;12(5):1869–85. doi: 10.1039/d0sc05971d (PMC8006597; doi:10.1039/d0sc05971d)
Supplement: Supplementary file 11 [file SC-012-D0SC05971D-s011.xlsx]

## Sheet: Sheet1
			Supplementary Table 7. Dali search results using catalytic domains of DS-epi1 crystal.
PDB ID	Uniprot Acc	Macromolecule Name	Source	Taxonomy ID	Z score (Dali)	rmsd	Alignment length	Number of residues	%id (sequence)	Pfam ID	Pfam Description	CATH ID [Res Range]	Cath Description	SCOP ID [Res Range]	Scop Domain	Scop Fold	PFAM Acc [Res Range]
3A0O	A9CEJ9	Oligo alginate lyase	Agrobacterium fabrum	1176649	27.2	4.3	581	764	17	DUF4962, Hepar_II_III	Domain of unknown function (DUF4962), Heparinase II/III-like protein						PF16332 [51-452], PF07940 [492-664]
2FUQ	C6XZB6	heparinase II protein	Pedobacter heparinus	984	24.3	5.6	575	747	15	DUF4962, Hepar_II_III	Domain of unknown function (DUF4962), Heparinase II/III-like protein						PF16332 [107-263], PF07940 [402-458]
1RWG	P84141	chondroitin AC lyase	Paenarthrobacter aurescens	43663	14.6	6.7	539	754	9	Lyase_8, Lyase_8_N, Lyase_8_C	Polysaccharide lyase family 8, super-sandwich domain, Polysaccharide lyase family 8, N terminal alpha-helical domain, Polysaccharide lyase family 8, C-terminal beta-sandwich domain	1.50.10.100 [4-372], 2.70.98.10 [373-643], 2.60.220.10 [644-757]	Chondroitin AC/alginate lyase, Hyaluronate lyase-like, C-terminal domain	97981 [4-372], 97982 [645-757], 97983 [373-644]	Chondroitinase AC, Chondroitinase AC, Chondroitinase AC	alpha/alpha toroid, Hyaluronate lyase-like, C-terminal domain, Supersandwich	PF02278 [376-633], PF08124 [16-336], PF02884 [648-710]
4OJZ	Q21FJ0	Putative alginate lyase	Saccharophagus degradans	86304	26.4	3.5	561	706	14	Alginate_lyase, Hepar_II_III	Alginate lyase, Heparinase II/III-like protein						PF05426 [53-298], PF07940 [379-654]
1LXM	Q53591	HYALURONATE Lyase	Streptococcus agalactiae	1311	16.5	7.7	540	794	9	Lyase_8, Lyase_8_N, Lyase_8_C	Polysaccharide lyase family 8, super-sandwich domain, Polysaccharide lyase family 8, N terminal alpha-helical domain, Polysaccharide lyase family 8, C-terminal beta-sandwich domain	2.60.40.1380 [173-248], 2.60.220.10 [903-981], 1.50.10.100 [249-622], 2.70.98.10 [628-902]	E set domains; domain 4, Hyaluronate lyase-like, C-terminal domain, Chondroitin AC/alginate lyase	78296 [249-619], 78297 [173-248], 78298 [912-984], 78299 [620-911]	Hyaluronate lyase, Hyaluronate lyase precatalytic domain, Hyaluronate lyase, Hyaluronate lyase	alpha/alpha toroid, Immunoglobulin-like beta-sandwich, Hyaluronate lyase-like, C-terminal domain, Supersandwich	PF02278 [626-900], PF08124 [259-583], PF02884 [915-979]
1W3Y	Q54873	HYALURONATE LYASE	Streptococcus pneumoniae	1313	16.2	6.7	547	721	11	Lyase_8, Lyase_8_N, Lyase_8_C	Polysaccharide lyase family 8, super-sandwich domain, Polysaccharide lyase family 8, N terminal alpha-helical domain, Polysaccharide lyase family 8, C-terminal beta-sandwich domain	2.70.98.10 [548-804], 1.50.10.100 [170-542], 2.60.220.10 [805-890]	Chondroitin AC/alginate lyase, Hyaluronate lyase-like, C-terminal domain	109168 [170-540], 109169 [815-890], 109170 [541-814]	Hyaluronate lyase, Hyaluronate lyase, Hyaluronate lyase	alpha/alpha toroid, Hyaluronate lyase-like, C-terminal domain, Supersandwich	PF02278 [546-801], PF08124 [181-503], PF02884 [817-880]
1HM3	Q59288	CHONDROITINASE AC	Pedobacter heparinus	984	14.5	6.7	509	674	7	Lyase_8, Lyase_8_N, Lyase_8_C	Polysaccharide lyase family 8, super-sandwich domain, Polysaccharide lyase family 8, N terminal alpha-helical domain, Polysaccharide lyase family 8, C-terminal beta-sandwich domain	1.50.10.100 [27-338], 2.70.98.10 [344-589], 2.60.220.10 [590-699]	Chondroitin AC/alginate lyase, Hyaluronate lyase-like, C-terminal domain	61086 [26-335], 61087 [600-699], 61088 [336-599]	Chondroitinase AC, Chondroitinase AC, Chondroitinase AC	alpha/alpha toroid, Hyaluronate lyase-like, C-terminal domain, Supersandwich	PF02278 [340-586], PF08124 [27-329], PF02884 [601-667]
4MMH	Q59289	Heparinase III protein	Pedobacter heparinus	984	22.4	3.8	421	637	10	Hepar_II_III_N, Hepar_II_III	Heparinase II/III N-terminus, Heparinase II/III-like protein						PF16889 [34-376], PF07940 [390-629]
5JMF	Q89YS4	Heparinase III protein	Bacteroides thetaiotaomicron	818	23.5	5.8	514	638	10	Hepar_II_III, Hepar_II_III_N	Heparinase II/III-like protein, Heparinase II/III N-terminus						PF07940 [397-634], PF16889 [29-383]
1N7Q	Q8CWU3	HYALURONIDASE	Streptococcus pneumoniae	1313	15.4	7.1	543	720	11	Lyase_8, Lyase_8_N, Lyase_8_C	Polysaccharide lyase family 8, super-sandwich domain, Polysaccharide lyase family 8, N terminal alpha-helical domain, Polysaccharide lyase family 8, C-terminal beta-sandwich domain	2.60.220.10 [805-889], 1.50.10.100 [171-542], 2.70.98.10 [548-804]	Hyaluronate lyase-like, C-terminal domain, Chondroitin AC/alginate lyase	80265 [170-540], 80266 [815-890], 80267 [541-814]	Hyaluronate lyase, Hyaluronate lyase, Hyaluronate lyase	alpha/alpha toroid, Hyaluronate lyase-like, C-terminal domain, Supersandwich	PF02278 [546-801], PF08124 [181-503], PF02884 [817-880]
1X1I	Q9AQS0	xanthan lyase	Bacillus sp, GL1	84635	14.4	6.4	534	752	8	Lyase_8_N, Lyase_8_C, Lyase_8	Polysaccharide lyase family 8, N terminal alpha-helical domain, Polysaccharide lyase family 8, C-terminal beta-sandwich domain, Polysaccharide lyase family 8, super-sandwich domain	2.60.220.10 [660-777], 2.70.98.10 [387-659], 1.50.10.100 [26-386]	Hyaluronate lyase-like, C-terminal domain, Chondroitin AC/alginate lyase	121584 [26-386], 121585 [660-777], 121586 [387-659]	Xanthan lyase, Xanthan lyase, Xanthan lyase	alpha/alpha toroid, Hyaluronate lyase-like, C-terminal domain, Supersandwich	PF08124 [36-349], PF02884 [663-727], PF02278 [391-648]
4F10	Q9KWU1	Alginate lyase	Sphingomonas sp,	28214	19.4	3.7	279	353	11	Alginate_lyase	Alginate lyase	1.50.10.100 [4-356]	Chondroitin AC/alginate lyase				PF05426 [40-293]
3NNB	A7LV19	alginate lyase	Bacteroides ovatus	28116	18.9	3.7	291	380	10	Alginate_lyase	Alginate lyase						PF05426 [65-343]
3VW5	P0DKY4	Cellobiose 2-epimerase	Ruminococcus albus	1264	17.6	3.4	286	389	8	GlcNAc_2-epim	N-acylglucosamine 2-epimerase (GlcNAc 2-epimerase)						PF07221 [28-361]
3WKF	F8WRK9	Cellobiose 2-epimerase	Rhodothermus marinus	29549	17.5	3.4	285	407	9	GlcNAc_2-epim	N-acylglucosamine 2-epimerase (GlcNAc 2-epimerase)						PF07221 [42-382]
4OZW	Q06749	Alginate lyase	Pseudomonas aeruginosa	287	17.4	3.8	260	334	11	Alginate_lyase	Alginate lyase						PF05426 [63-303]
3WKG	F8WRK9	Cellobiose 2-epimerase	Rhodothermus marinus	29549	17.3	3.4	288	410	9	GlcNAc_2-epim	N-acylglucosamine 2-epimerase (GlcNAc 2-epimerase)						PF07221 [42-382]
4OZV	Q06749	Alginate lyase	Pseudomonas aeruginosa	287	17.2	3.7	262	333	11	Alginate_lyase	Alginate lyase						PF05426 [63-303]
4XUV	G2QVG2	Glycoside hydrolase family 105 protein	Thielavia terrestris	35720	17.2	3.6	272	332	10	Glyco_hydro_88	Glycosyl Hydrolase Family 88						PF07470 [27-376]
2GH4	O34559	Putative glycosyl hydrolase yteR	Bacillus subtilis	1423	17.1	3.6	274	363	9	Glyco_hydro_88	Glycosyl Hydrolase Family 88	1.50.10.10 [11-373]					PF07470 [17-366]
4Z4L	A4XGA6	Cellobiose 2-epimerase	Caldicellulosiruptor saccharolyticus	44001	16.8	3.5	281	392	8	GlcNAc_2-epim	N-acylglucosamine 2-epimerase (GlcNAc 2-epimerase)						PF07221 [32-370]
3K11	Q8A045	Putative glycosyl hydrolase	Bacteroides thetaiotaomicron	818	16.4	3.9	285	439	6	Glyco_hydro_88	Glycosyl Hydrolase Family 88						PF07470 [62-434]
3VXD	Q8E372	Putative uncharacterized protein gbs1889	Streptococcus agalactiae	1311	16.4	3.5	263	358	9	Glyco_hydro_88	Glycosyl Hydrolase Family 88						PF07470 [64-392]
4WU0	Q97M41	Similar to yteR (Bacilus subtilis)	Clostridium acetobutylicum	1488	16.2	3.7	273	360	7	Glyco_hydro_88	Glycosyl Hydrolase Family 88						PF07470 [14-360]
3PMM	A6TB44	Putative cytoplasmic protein	Klebsiella pneumoniae	573	16.1	3.9	274	381	10	Glyco_hydro_88	Glycosyl Hydrolase Family 88	1.50.10.10 [-1-379]					PF07470 [38-377]
3QWT	A0A0H2WND1	Putative GH105 family protein	Salmonella enterica	28901	16	3.8	270	378	9	Glyco_hydro_88	Glycosyl Hydrolase Family 88	1.50.10.10 [2-378]					PF07470 [37-376]
5NOA	Q8A1H4	Family 88 glycosyl hydrolase	Bacteroides thetaiotaomicron	818	16	3.9	277	354	6	Glyco_hydro_88	Glycosyl Hydrolase Family 88						PF07470 [37-375]
4Q88	A6L195	Uncharacterized protein	Bacteroides vulgatus	821	16	3.9	276	350	5	Glyco_hydro_88	Glycosyl Hydrolase Family 88						PF07470 [35-372]
3GT5	B2I5L9	N-acetylglucosamine 2-epimerase	Xylella fastidiosa	2371	15.5	3.8	277	391	9	GlcNAc_2-epim	N-acylglucosamine 2-epimerase (GlcNAc 2-epimerase)	1.50.10.10 [9-399]					PF07221 [39-389]
3WUX	Q8E372	Unsaturated chondroitin disaccharide hydrolase	Streptococcus agalactiae	1311	15.4	3.4	258	376	8	Glyco_hydro_88	Glycosyl Hydrolase Family 88						PF07470 [64-392]
3WIW	C6Y1N7	Glycosyl hydrolase family 88	Pedobacter heparinus	984	15.4	3.9	266	371	10	Glyco_hydro_88	Glycosyl Hydrolase Family 88						PF07470 [71-388]
1L2A	P0C2S5	cellobiohydrolase	Ruminiclostridium thermocellum	1515	15.3	3.6	276	642	8	Glyco_hydro_48	Glycosyl hydrolase family 48	4.10.870.10 [575-640], 2.170.160.10 [122-167], 2.170.160.10 [183-251], 2.170.160.10 [328-342], 1.50.10.10 [32-121], 1.50.10.10 [168-182], 1.50.10.10 [252-326], 1.50.10.10 [343-574], 1.50.10.10 [641-662]	Endo-1,4-beta-glucanase f. Domain 3, Endo-1,4-beta-glucanase f. Domain 2, Endo-1,4-beta-glucanase f. Domain 2, Endo-1,4-beta-glucanase f. Domain 2	73493	Processive endocellulase CelF (Cel48F)	alpha/alpha toroid	PF02011 [40-661]
1AGM	P69327	GLUCOAMYLASE-471	Aspergillus awamori	105351	15.3	4	285	470	11	Glyco_hydro_15	Glycosyl hydrolases family 15	1.50.10.10 [1-471]		18824	Glucoamylase	alpha/alpha toroid	PF00723 [13-425]
3EQA	P69328	Glucoamylase	Aspergillus niger	5061	15.3	3.8	281	458	12	Glyco_hydro_15	Glycosyl hydrolases family 15	1.50.10.10 [30-487]					PF00723 [37-449]
2ZBL	Q8ZKT7	Putative isomerase	Salmonella enterica	90371	15.3	3.7	276	416	11	GlcNAc_2-epim	N-acylglucosamine 2-epimerase (GlcNAc 2-epimerase)	1.50.10.10 [1-421]					PF07221 [32-387]
2RGK	P32140	Uncharacterized sugar isomerase yihS	Escherichia coli	562	15.3	3.7	276	409	10	GlcNAc_2-epim	N-acylglucosamine 2-epimerase (GlcNAc 2-epimerase)	1.50.10.10 [1-413]					PF07221 [32-387]
2ZZR	Q3DUP2	Unsaturated glucuronyl hydrolase	Streptococcus agalactiae	1311	15.3	3.4	261	397	7	Glyco_hydro_88	Glycosyl Hydrolase Family 88	1.50.10.10 [2-398]					PF07470 [64-392]
1W6J	P48449	LANOSTEROL SYNTHASE	Homo sapiens	9606	15.2	3.5	268	727	8	SQHop_cyclase_N, SQHop_cyclase_C	Squalene-hopene cyclase N-terminal domain, Squalene-hopene cyclase C-terminal domain	1.50.10.20 [72-97], 1.50.10.20 [383-732], 1.50.10.20 [98-382]		114269 [6-99], 114269 [379-732], 114270 [100-378]	Lanosterol synthase, Lanosterol synthase, Lanosterol synthase	alpha/alpha toroid, alpha/alpha toroid, alpha/alpha toroid	PF13249 [84-325], PF13243 [384-720]
1DOG	P69327	GLUCOAMYLASE-471	Aspergillus awamori	105351	15.2	4.1	286	470	11	Glyco_hydro_15	Glycosyl hydrolases family 15	1.50.10.10 [1-471]		18823	Glucoamylase	alpha/alpha toroid	PF00723 [13-425]
2AFA	Q8ZKT7	NAG isomerase	Salmonella enterica	90371	15.2	3.7	274	408	10	GlcNAc_2-epim	N-acylglucosamine 2-epimerase (GlcNAc 2-epimerase)	1.50.10.10 [3-415]		126668 [4-415]	Putative NAG isomerase YihS	alpha/alpha toroid	PF07221 [34-390]
2F6D	P08017	Glucoamylase GLU1	Saccharomycopsis fibuligera	4944	15.1	4	286	492	7	Glyco_hydro_15	Glycosyl hydrolases family 15	1.50.10.10 [1-492]		133039 [1-492]	Glucoamylase	alpha/alpha toroid	PF00723 [28-482]
1GAI	P69327	GLUCOAMYLASE-471	Aspergillus awamori	105351	15.1	4.1	286	472	11	Glyco_hydro_15	Glycosyl hydrolases family 15	1.50.10.10 [1-473]		18819	Glucoamylase	alpha/alpha toroid	PF00723 [13-425]
3GLY	P69327	GLUCOAMYLASE-471	Aspergillus awamori	105351	15.1	4.1	287	470	11	Glyco_hydro_15	Glycosyl hydrolases family 15	1.50.10.10 [1-471]		18822	Glucoamylase	alpha/alpha toroid	PF00723 [13-425]
3OS7	Q97L65	galactose mutarotase-like protein	Clostridium acetobutylicum	1488	15.1	2.9	203	338	5	Aldose_epim	Aldose 1-epimerase						PF01263 [19-335]
1AYX	P08017	GLUCOAMYLASE	Saccharomycopsis fibuligera	4944	15	4	284	492	8	Glyco_hydro_15	Glycosyl hydrolases family 15	1.50.10.10 [1-492]		18825	Glucoamylase	alpha/alpha toroid	PF00723 [28-482]
2FBA	P08017	Glucoamylase GLU1	Saccharomycopsis fibuligera	4944	15	4	286	492	7	Glyco_hydro_15	Glycosyl hydrolases family 15	1.50.10.10 [1-492]		133239 [1-492]	Glucoamylase	alpha/alpha toroid	PF00723 [28-482]
1FP3	P17560	N-ACYL-D-GLUCOSAMINE 2-EPIMERASE	Sus scrofa	9823	15	3.7	282	402	7	GlcNAc_2-epim	N-acylglucosamine 2-epimerase (GlcNAc 2-epimerase)	1.50.10.10 [1-402]		18842	N-acyl-D-glucosamine 2-epimerase	alpha/alpha toroid	PF07221 [37-376]
4CE7	L7P9J4	UNSATURATED 3S-RHAMNOGLYCURONYL HYDROLASE	Nonlabens ulvanivorans	906888	14.9	3.8	265	345	5	Glyco_hydro_88	Glycosyl Hydrolase Family 88						PF07470 [43-361]
3ANI	Q8E372	Putative uncharacterized protein gbs1889	Streptococcus agalactiae	1311	14.7	3.3	254	378	6	Glyco_hydro_88	Glycosyl Hydrolase Family 88	1.50.10.10 [2-398]					PF07470 [64-392]
1VD5	Q9RC92	unsaturated glucuronyl hydrolase	Bacillus sp, GL1	84635	14.6	3.5	257	381	9	Glyco_hydro_88	Glycosyl Hydrolase Family 88	1.50.10.10 [1-377]		108518	Unsaturated glucuronyl hydrolase	alpha/alpha toroid	PF07470 [18-366]
3ANK	Q8E372	Putative uncharacterized protein gbs1889	Streptococcus agalactiae	1311	14.6	3.3	252	377	5	Glyco_hydro_88	Glycosyl Hydrolase Family 88	1.50.10.10 [2-398]					PF07470 [64-392]
3MWX	P39840	Aldose 1-epimerase	Bacillus subtilis	1423	14.6	3	204	322	9	Aldose_epim	Aldose 1-epimerase	2.70.98.10 [2-323]					PF01263 [16-318]
2AHF	Q9RC92	unsaturated glucuronyl hydrolase	Bacillus sp, GL1	84635	14.5	3.8	258	377	8	Glyco_hydro_88	Glycosyl Hydrolase Family 88	1.50.10.10 [1-377]					PF07470 [18-366]
4V1S	Q8A3K5	ALPHA-1,6-MANNANASE	Bacteroides thetaiotaomicron	818	14.5	4.2	275	359	8	Glyco_hydro_76	Glycosyl hydrolase family 76						PF03663 [136-306]
3ANJ	Q8E372	Putative uncharacterized protein gbs1889	Streptococcus agalactiae	1311	14.4	3.4	252	376	5	Glyco_hydro_88	Glycosyl Hydrolase Family 88	1.50.10.10 [2-398]					PF07470 [64-392]
4V1R	Q8A3K5	ALPHA-1,6-MANNANASE	Bacteroides thetaiotaomicron	818	14.4	4.2	275	361	8	Glyco_hydro_76	Glycosyl hydrolase family 76						PF03663 [136-306]
4BZG	P39840	ALDOSE 1-EPIMERASE	Bacillus subtilis	1423	14.4	3	204	322	9	Aldose_epim	Aldose 1-epimerase						PF01263 [16-318]
5HSS	E1XUJ2	Linalool dehydratase/isomerase	Castellaniella defragrans	75697	14.3	3.8	258	366	9	Ldi	Linalool dehydratase/isomerase						PF18566 [141-336]
4BZE	P39840	ALDOSE 1-EPIMERASE	Bacillus subtilis	1423	14.3	3.1	204	322	9	Aldose_epim	Aldose 1-epimerase						PF01263 [16-318]
1K1X	O32462	4-ALPHA-GLUCANOTRANSFERASE	Thermococcus litoralis	2265	14.1	6.2	253	636	7	DUF1925, Glyco_hydro_57, DUF1926	Domain of unknown function (DUF1925), Glycosyl hydrolase family 57, Domain of unknown function (DUF1926)	2.70.98.10 [386-659]		84279 [311-384], 84280 [385-659], 84281 [1-310]	4-alpha-glucanotransferase, domain 2, 4-alpha-glucanotransferase, C-terminal domain, 4-alpha-glucanotransferase, N-terminal domain	immunoglobulin/albumin-binding domain-like, Supersandwich, 7-stranded beta/alpha barrel	PF09094 [311-383], PF03065 [7-290], PF09095 [392-655]
2GZ6	A4UA16	N-acetyl-D-glucosamine 2-epimerase	Anabaena sp, CH1	360069	14.1	3.8	270	372	9	GlcNAc_2-epim	N-acylglucosamine 2-epimerase (GlcNAc 2-epimerase)	1.50.10.10 [3-388]					PF07221 [34-368]
5G1W	E1XUJ2	LINALOOL DEHYDRATASE/ISOMERASE	Castellaniella defragrans	75697	14.1	3.7	255	364	9
5DGR	Q6LUT2	Putative endoglucanase-related protein	Photobacterium profundum+13:69	74109	14	3.9	286	573	8	Glyco_hydro_9	Glycosyl hydrolase family 9						PF00759 [98-509]
5NOK	E2N9D0	BACCELL_00875	Bacteroides cellulosilyticus	246787	14	4	259	668	8
5I3T	E1XUJ2	Linalool dehydratase/isomerase	Castellaniella defragrans	75697	14	3.8	262	362	8
1H12	Q8RJN8	ENDO-1,4-BETA-XYLANASE	Pseudoalteromonas haloplanktis	228	13.9	4	274	403	5	Glyco_hydro_8	Glycosyl hydrolases family 8	1.50.10.10 [1-404]		83447	Endo-1,4-beta-xylanase	alpha/alpha toroid	PF01270 [59-392]
4MU9	Q8A184	Glycoside hydrolase family 73	Bacteroides thetaiotaomicron	818	13.9	3.7	263	359	6	Glyco_hydro_76	Glycosyl hydrolase family 76						PF03663 [71-364]
4BOK	Q9Z4P9	ALPHA-1,6-MANNANASE	Bacillus circulans	1397	13.9	4	263	340	9	Glyco_hydro_76	Glycosyl hydrolase family 76						PF03663 [38-371]
5AGD	Q9Z4P9	ALPHA-1,6-MANNANASE	Bacillus circulans	1397	13.9	3.8	258	333	10	Glyco_hydro_76	Glycosyl hydrolase family 76						PF03663 [39-371]
